# Supplementary material for: iTRAQ-Based Quantitative Proteomic Analysis of the Initiation of Head Regeneration in Planarians
Source: PLoS One. 2015 Jul 1;10(7):e0132045. doi: 10.1371/journal.pone.0132045 (PMC4488856; doi:10.1371/journal.pone.0132045)
Supplement: S2 Table — (XLS) [file pone.0132045.s002.xls]

## Sheet: S2 Table
S2 Table. Details for the identified proteins.
Accession	Description	MW [kDa]	calc. pI	Coverage	Unique Peptides	Proteins	Molecular Function	Cellular Component	Biological Process	Pfam IDs	Expression Abundance			2h/0h		6h/0h
											0h	2h	6h	ratio	p-value	ratio	p-value
F1LNS7	Protein Dnah5 (Fragment) OS=Rattus norvegicus GN=Dnah5 PE=4 SV=1 - [F1LNS7_RAT]	441.712	5.75732	0.44	2	34	nucleotide binding; catalytic activity; motor activity	cytoskeleton; membrane	cellular component movement; metabolic process	Pf03028; Pf07728; Pf08385; Pf08393; Pf12774; Pf12775; Pf12777; Pf12780; Pf12781	2.47936	1.80825	2.07636	0.729321	0.0529527	0.837458	0.206204
F1R7N8	Uncharacterized protein OS=Danio rerio GN=ttna PE=2 SV=1 - [F1R7N8_DANRE]	3484.59	6.45557	0.63	13	9	catalytic activity; enzyme regulator activity; protein binding; nucleotide binding	membrane	metabolic process; cell communication; regulation of biological process; response to stimulus	Pf00041; Pf00047; Pf00069; Pf02463; Pf02480; Pf05262; Pf07679; Pf07686; Pf07714; Pf08204; Pf10243	2.52566	3.24939	2.06298	1.28655	0.0939113	0.816805	0.14364
A5X6X6	Titin b OS=Danio rerio GN=ttnb PE=2 SV=1 - [A5X6X6_DANRE]	3198.24	6.32861	0.7	14	9	catalytic activity; enzyme regulator activity; protein binding; nucleotide binding; transporter activity	nucleus; membrane	metabolic process; transport; cell differentiation; cell organization and biogenesis; cell communication; regulation of biological process; response to stimulus	Pf00041; Pf00047; Pf00069; Pf02029; Pf07679; Pf07686; Pf07714; Pf08729; Pf09507; Pf10243	0.796647	0.991655	0.995755	1.24479	0.138768	1.24993	0.0279302
F1Q4X1	Uncharacterized protein OS=Danio rerio GN=col6a3 PE=2 SV=1 - [F1Q4X1_DANRE]	338.682	7.88428	0.97	2	2	enzyme regulator activity; protein binding	membrane		Pf00014; Pf00092; Pf01391	1.12765	1.20125	1.30919	1.06527	0.5745	1.16099	0.12706
F1Q9H9	Uncharacterized protein OS=Danio rerio GN=mtor PE=2 SV=1 - [F1Q9H9_DANRE]	285.957	6.99072	0.99	2	4	nucleotide binding; protein binding; catalytic activity		metabolic process	Pf00454; Pf02259; Pf02260; Pf08771; Pf11865	0.587578	0.211425	0.478253	0.359825	1.43529e-11	0.81394	0.136152
Q642I4	Ubr5 protein (Fragment) OS=Danio rerio GN=ubr5 PE=2 SV=1 - [Q642I4_DANRE]	198.13	5.42725	1.06	2	11	RNA binding; catalytic activity; metal ion binding; protein binding	nucleus; cytoplasm	metabolic process; cell communication; regulation of biological process; response to stimulus	Pf00632; Pf00658; Pf02207	0.962522	0.453106	0.923743	0.470749	8.59042e-07	0.959711	0.855618
F1RCR6	E3 ubiquitin-protein ligase TRIP12 OS=Danio rerio GN=trip12 PE=2 SV=1 - [TRIPC_DANRE]	222.904	8.36768	1.18	2	3	catalytic activity	nucleus; organelle lumen; cytoplasm; membrane	metabolic process; response to stimulus; development; cell organization and biogenesis; regulation of biological process	Pf00632; Pf02825	1.00548	0.982305	0.910338	0.976952	0.959552	0.905378	0.519068
E7FBD3	Uncharacterized protein OS=Danio rerio PE=4 SV=1 - [E7FBD3_DANRE]	495.672	5.63037	1.18	3	1	transporter activity	cytoplasm; cytoskeleton; membrane	cell organization and biogenesis; transport	Pf01347; Pf06160; Pf06448; Pf07083; Pf09172	1.43237	1.51015	1.33612	1.0543	0.616845	0.932804	0.683428
O35821	Myb-binding protein 1A OS=Rattus norvegicus GN=Mybbp1a PE=2 SV=2 - [MBB1A_RAT]	152.191	8.95361	1.56	2	1	DNA binding; catalytic activity	nucleus; organelle lumen; cytoplasm	metabolic process; regulation of biological process; transport; cell communication; response to stimulus; cell death	Pf04931	0.246866	0.0843561	0.132656	0.341708	1.18873e-12	0.537362	1.68706e-06
D5LXF2	Chromodomain helicase DNA-binding protein 4 OS=Schmidtea mediterranea PE=2 SV=1 - [D5LXF2_SCHMD]	214.477	6.12549	1.66	3	1	DNA binding; catalytic activity; protein binding; nucleotide binding; metal ion binding	nucleus; membrane	metabolic process; regulation of biological process	Pf00176; Pf00271; Pf00385; Pf00628; Pf04851; Pf06461; Pf06465; Pf08073; Pf08074	2.16162	2.91227	2.10507	1.34726	0.0515088	0.973835	0.947432
F1QDL1	Uncharacterized protein OS=Danio rerio GN=col1a1b PE=2 SV=1 - [F1QDL1_DANRE]	136.83	5.52881	1.86	2	3	structural molecule activity; protein binding	extracellular		Pf00093; Pf01391; Pf01410	0.764789	1.08473	0.75174	1.41834	0.0244121	0.982938	0.992716
F1RCV0	Uncharacterized protein (Fragment) OS=Danio rerio GN=abcc2 PE=3 SV=1 - [F1RCV0_DANRE]	173.912	7.21045	1.87	2	4	nucleotide binding; transporter activity; catalytic activity	membrane	metabolic process; transport	Pf00005; Pf00664	1.41733	1.20445	1.35605	0.849803	0.372156	0.956764	0.836493
F1LNH3	Protein Col6a2 (Fragment) OS=Rattus norvegicus GN=Col6a2 PE=2 SV=1 - [F1LNH3_RAT]	109.359	6.60986	1.95	2	2	protein binding	membrane		Pf00092; Pf01391	0.459204	0.778854	0.745272	1.69609	0.000946664	1.62296	4.70633e-06
F1QYN0	Uncharacterized protein (Fragment) OS=Danio rerio GN=LOC100331428 PE=4 SV=1 - [F1QYN0_DANRE]	178.227	8.39697	1.99	2	1	enzyme regulator activity; protein binding	extracellular; membrane	metabolic process; regulation of biological process	Pf00207; Pf01759; Pf01821; Pf01835; Pf07677; Pf07678; Pf07703; Pf10569	1.35972	1.33193	1.33384	0.979559	0.947027	0.980964	0.993611
D3ZJX7	Protein Sf3b2 OS=Rattus norvegicus GN=Sf3b2 PE=2 SV=1 - [D3ZJX7_RAT]	98.299	5.50342	2.16	2	4		nucleus		Pf02037; Pf04037; Pf04046	1.49883	1.17716	1.5871	0.78538	0.152663	1.05889	0.491949
D5JG39	Decapping enzyme like-1 protein (Fragment) OS=Dugesia japonica GN=DCPL-1 PE=2 SV=1 - [D5JG39_DUGJA]	95.2739	6.52197	2.23	2	1		membrane			2.33617	2.33064	2.37708	0.997636	0.861593	1.01751	0.745883
G3V6H2	Pre-mRNA processing factor 8, isoform CRA_a OS=Rattus norvegicus GN=Prpf8 PE=4 SV=1 - [G3V6H2_RAT]	273.443	8.83643	2.31	5	5	protein binding	nucleus; spliceosomal complex	metabolic process	Pf01398; Pf08082; Pf08083; Pf08084; Pf10596; Pf10597; Pf10598; Pf12134	2.08202	1.8361	2.10932	0.881883	0.522369	1.01311	0.775974
F1M7S9	Uncharacterized protein OS=Rattus norvegicus PE=2 SV=1 - [F1M7S9_RAT]	1408.29	6.34131	2.34	22	5	protein binding	cytoplasm	development; cell differentiation; cell organization and biogenesis	Pf00041; Pf00047; Pf07679; Pf07686; Pf09042	0.473093	0.874687	0.90992	1.84887	0.000136271	1.92334	9.10009e-10
B2GV09	Llgl2 protein OS=Rattus norvegicus GN=Llgl2 PE=2 SV=1 - [B2GV09_RAT]	113.952	7.53271	2.53	2	1	protein binding	cytoplasm	regulation of biological process	Pf08366	1.45354	1.44131	1.33453	0.991588	0.889872	0.918125	0.593512
F1RCY6	Uncharacterized protein OS=Danio rerio GN=upf1 PE=2 SV=1 - [F1RCY6_DANRE]	122.001	6.68311	2.55	2	2	DNA binding; catalytic activity; nucleotide binding; metal ion binding	cytoplasm	metabolic process; transport	Pf00448; Pf04851; Pf09416	0.628227	0.637428	0.653166	1.01465	0.783996	1.0397	0.602673
D3ZIE9	Protein Aldh18a1 OS=Rattus norvegicus GN=Aldh18a1 PE=4 SV=1 - [D3ZIE9_RAT]	87.275	7.56201	2.64	2	4	catalytic activity	cytoplasm; mitochondrion	metabolic process	Pf00171; Pf00696	1.45161	1.75643	1.49151	1.20999	0.189154	1.02749	0.679634
D5JG54	Eukaryotic initiation factor-4G OS=Dugesia japonica GN=eIF4G PE=2 SV=1 - [D5JG54_DUGJA]	64.9324	7.85498	2.65	2	1	DNA binding; RNA binding; protein binding		metabolic process	Pf02847; Pf02854	2.07747	2.12392	2.17934	1.02236	0.749872	1.04904	0.547144
F8WG57	Protein TBRG4 OS=Rattus norvegicus GN=Tbrg4 PE=4 SV=1 - [F8WG57_RAT]	67.7809	8.48486	2.67	2	2	catalytic activity	membrane	metabolic process	Pf06743; Pf08368; Pf08373	1.85549	1.93055	1.97124	1.04046	0.672781	1.06238	0.473256
F1M8X9	Protein Gbf1 (Fragment) OS=Rattus norvegicus GN=Gbf1 PE=4 SV=1 - [F1M8X9_RAT]	200.245	5.74463	2.71	4	4	enzyme regulator activity	cytoplasm; mitochondrion; endoplasmic reticulum; organelle lumen; Golgi; membrane	transport; cell communication; regulation of biological process; response to stimulus	Pf01369; Pf12783	1.90952	1.60006	1.74205	0.837942	0.322998	0.912296	0.558999
Q1JUB3	L1-like cell adhesion molecule OS=Dugesia japonica GN=DjLCAM PE=2 SV=1 - [Q1JUB3_DUGJA]	151.355	6.62451	2.74	3	1	protein binding			Pf00041; Pf00047; Pf07679	1.69824	1.61491	1.80207	0.950929	0.900103	1.06114	0.479859
B0UYD6	Uncharacterized protein OS=Danio rerio GN=qars PE=4 SV=1 - [B0UYD6_DANRE]	87.7821	7.6499	2.84	2	8	nucleotide binding; catalytic activity	cytoplasm	metabolic process	Pf00749; Pf03950; Pf04557; Pf04558	1.76377	1.86279	1.80226	1.05614	0.609625	1.02182	0.716924
F8W3Z4	Uncharacterized protein OS=Danio rerio GN=xirp2a PE=2 SV=1 - [F8W3Z4_DANRE]	88.7731	4.99561	2.85	2	1	metal ion binding			Pf00412	0.93336	1.05216	1.00776	1.12728	0.370627	1.07972	0.387242
D3ZKZ9	Unconventional myosin-Id OS=Rattus norvegicus GN=Myo1d PE=2 SV=1 - [D3ZKZ9_RAT]	108.511	9.48096	2.88	2	2	nucleotide binding; catalytic activity; motor activity; protein binding	membrane; cytoskeleton		Pf00063; Pf06017	0.267693	0.416652	0.329036	1.55646	0.00512722	1.22916	0.0407994
D3ZZA8	Protein Sec24a OS=Rattus norvegicus GN=Sec24a PE=4 SV=1 - [D3ZZA8_RAT]	118.792	7.59131	3.12	3	3	metal ion binding	cytoplasm; membrane	transport	Pf00626; Pf04810; Pf04811; Pf04815; Pf08033	1.16475	1.12902	0.77915	0.969326	0.996431	0.668941	0.00230123
F1M6Z1	Apolipoprotein B-100 OS=Rattus norvegicus GN=Apob PE=2 SV=1 - [F1M6Z1_RAT]	509.376	7.21045	3.13	11	3	transporter activity; protein binding	extracellular; cytoplasm; endoplasmic reticulum; membrane; organelle lumen	development; metabolic process; transport; reproduction; response to stimulus; cell differentiation; regulation of biological process; cellular component movement; cell organization and biogenesis	Pf01347; Pf06448; Pf09172; Pf12491	0.513123	0.724585	0.526706	1.41211	0.0261072	1.02647	0.686272
E7FA67	Uncharacterized protein OS=Danio rerio GN=lratb PE=4 SV=1 - [E7FA67_DANRE]	75.5567	7.56201	3.15	2	1		membrane		Pf07287	1.2054	1.51007	1.03188	1.25275	0.129005	0.856049	0.275845
P52632	Signal transducer and activator of transcription 5B OS=Rattus norvegicus GN=Stat5b PE=2 SV=1 - [STA5B_RAT]	90.1667	6.20166	3.31	2	4	DNA binding; signal transducer activity; metal ion binding; protein binding	nucleus; cytoplasm; cytosol	metabolic process; development; reproduction; response to stimulus; cell differentiation; regulation of biological process; defense response; cell communication; transport; cell proliferation; cell death; cellular component movement	Pf00017; Pf01017; Pf02864; Pf02865	0.651609	0.602438	0.676915	0.92454	0.750867	1.03884	0.607949
P47197	RAC-beta serine/threonine-protein kinase OS=Rattus norvegicus GN=Akt2 PE=1 SV=1 - [AKT2_RAT]	55.508	6.3667	3.33	2	45	nucleotide binding; catalytic activity; protein binding	nucleus; organelle lumen; cytoplasm; cytosol; membrane	metabolic process; regulation of biological process; transport; cell death; response to stimulus; development; cell communication; cellular component movement; cell differentiation; cell organization and biogenesis; cellular homeostasis	Pf00069; Pf00169; Pf00433; Pf07714	1.96771	1.55826	1.96211	0.791917	0.16955	0.997157	0.888682
P02454	Collagen alpha-1(I) chain OS=Rattus norvegicus GN=Col1a1 PE=1 SV=5 - [CO1A1_RAT]	137.869	5.92236	3.44	2	2	structural molecule activity; protein binding	extracellular; cytoplasm	development; cell differentiation; response to stimulus; cell organization and biogenesis; regulation of biological process; transport; cellular component movement; metabolic process; cell communication	Pf00093; Pf01391; Pf01410	0.354999	0.599676	0.333375	1.68924	0.0010307	0.939089	0.722996
B5DE37	Putative uncharacterized protein (Fragment) OS=Danio rerio GN=gcn1l1 PE=2 SV=1 - [B5DE37_DANRE]	292.444	6.7417	3.45	4	3	protein binding			Pf12074	0.83805	1.04094	0.942515	1.2421	0.142207	1.12465	0.216423
Q5BLE8	Putative all-trans-retinol 13,14-reductase OS=Danio rerio GN=retsat PE=2 SV=1 - [RETST_DANRE]	67.8944	8.23584	3.46	2	1	catalytic activity	cytoplasm; endoplasmic reticulum; membrane	metabolic process	Pf01593	0.888254	0.936836	0.856136	1.05469	0.615292	0.963841	0.88246
D4ABS2	Dynamin-1-like protein OS=Rattus norvegicus GN=Dnm1l PE=2 SV=1 - [D4ABS2_RAT]	80.8947	7.38623	3.46	2	4	nucleotide binding; catalytic activity	membrane	metabolic process	Pf00350; Pf01031; Pf02212	1.37099	1.43881	1.33971	1.04946	0.636069	0.977182	0.969139
B7ZUU8	Si:ch211-129c21.6 OS=Danio rerio GN=ap3d1 PE=2 SV=1 - [B7ZUU8_DANRE]	140.141	6.99072	3.53	3	2		cytoplasm; membrane	transport	Pf01602; Pf06375	2.16904	2.03889	2.35242	0.939996	0.838037	1.08455	0.365313
D3ZT15	Oxysterol-binding protein OS=Rattus norvegicus GN=Osbp PE=2 SV=1 - [D3ZT15_RAT]	84.8762	7.29834	3.6	3	4	protein binding		transport	Pf00169; Pf01237	0.433051	0.472226	0.365032	1.09046	0.484339	0.842931	0.225383
E7FFM8	Uncharacterized protein OS=Danio rerio PE=4 SV=1 - [E7FFM8_DANRE]	86.9597	5.71924	3.61	2	2	protein binding			Pf00092; Pf08487	0.588741	0.749112	0.653487	1.2724	0.107432	1.10997	0.26425
B1WB97	LOC556726 protein (Fragment) OS=Danio rerio GN=ctnnd1 PE=2 SV=1 - [B1WB97_DANRE]	100.012	7.03467	3.65	2	4	protein binding			Pf00514; Pf04826	1.04022	1.2407	0.883999	1.19273	0.219335	0.849818	0.251085
F1Q6P3	Uncharacterized protein (Fragment) OS=Danio rerio GN=col6a1 PE=4 SV=1 - [F1Q6P3_DANRE]	107.988	6.34131	3.86	2	1	protein binding		development	Pf00092; Pf01391	1.20583	1.46014	1.06905	1.2109	0.187659	0.886563	0.417046
F1Q6Z9	Uncharacterized protein (Fragment) OS=Danio rerio PE=4 SV=1 - [F1Q6Z9_DANRE]	84.8938	5.24951	3.89	3	4	catalytic activity	membrane	metabolic process	Pf01055	1.38306	1.41507	1.33478	1.02315	0.746428	0.965097	0.890629
Q1LUQ3	Uncharacterized protein OS=Danio rerio GN=timm44 PE=4 SV=1 - [Q1LUQ3_DANRE]	50.734	7.88428	3.98	2	2	transporter activity	cytoplasm; membrane; mitochondrion	transport	Pf04280	1.08108	0.951517	1.17475	0.880151	0.513688	1.08664	0.356087
F1RB36	Uncharacterized protein OS=Danio rerio GN=hacl1 PE=2 SV=1 - [F1RB36_DANRE]	61.5345	6.53662	4.23	2	2	metal ion binding; catalytic activity		metabolic process	Pf00205; Pf02775; Pf02776	1.19847	1.16225	1.17046	0.969776	0.994245	0.976632	0.96558
E7F1L7	Uncharacterized protein OS=Danio rerio GN=CU302436.1 PE=4 SV=1 - [E7F1L7_DANRE]	291.466	6.43018	4.27	2	2	protein binding	membrane		Pf00307; Pf00630	0.890244	0.449219	1.42408	0.504602	8.67673e-06	1.59965	8.76145e-06
E7FFC4	Uncharacterized protein OS=Danio rerio GN=LOC557507 PE=4 SV=1 - [E7FFC4_DANRE]	40.4448	7.76709	4.29	2	1	catalytic activity		metabolic process	Pf07992	1.32578	1.48259	1.33572	1.11828	0.396443	1.00749	0.81504
F1QFW5	Uncharacterized protein (Fragment) OS=Danio rerio GN=rpn2 PE=2 SV=1 - [F1QFW5_DANRE]	68.8549	5.38916	4.29	2	4	catalytic activity	cytoplasm; endoplasmic reticulum; membrane	metabolic process	Pf05817	1.38483	1.49608	1.39245	1.08034	0.51939	1.0055	0.829059
A1L226	Zgc:158605 OS=Danio rerio GN=zgc:158605 PE=2 SV=1 - [A1L226_DANRE]	54.501	6.88818	4.3	2	2	catalytic activity		metabolic process	Pf00561; Pf05577	1.01194	0.870034	1.10414	0.859765	0.416249	1.09111	0.336923
A1L258	D-2-hydroxyglutarate dehydrogenase, mitochondrial OS=Danio rerio GN=d2hgdh PE=2 SV=1 - [D2HDH_DANRE]	58.6769	6.99072	4.32	2	3	catalytic activity	cytoplasm; mitochondrion	metabolic process	Pf01565; Pf02913	2.09137	2.00998	2.21025	0.961083	0.957666	1.05685	0.503124
A3KPS7	Uncharacterized protein OS=Danio rerio GN=ugt5c2 PE=4 SV=1 - [A3KPS7_DANRE]	60.6211	7.94287	4.33	2	4	catalytic activity		metabolic process	Pf00201; Pf04101	1.30059	1.99517	1.19355	1.53405	0.00666009	0.917705	0.591003
F1QM18	Uncharacterized protein OS=Danio rerio GN=zgc:136858 PE=2 SV=1 - [F1QM18_DANRE]	75.1617	7.44482	4.43	2	2	catalytic activity; metal ion binding		metabolic process	Pf00294; Pf04227	1.53952	1.56124	1.4294	1.01411	0.786404	0.928471	0.656489
Q504K4	Cytochrome P450, family 1, subfamily A OS=Danio rerio GN=cyp1a PE=2 SV=1 - [Q504K4_DANRE]	58.4175	7.6792	4.44	2	3	catalytic activity; metal ion binding		metabolic process; response to stimulus	Pf00067	1.0278	0.987752	1.08466	0.961033	0.957387	1.05532	0.511563
Q68FT3	Pyridine nucleotide-disulfide oxidoreductase domain-containing protein 2 OS=Rattus norvegicus GN=Pyroxd2 PE=2 SV=1 - [PYRD2_RAT]	62.8394	8.17725	4.48	2	1	catalytic activity		metabolic process	Pf00890; Pf01134; Pf01266; Pf01593; Pf01946; Pf07992	0.537533	0.801694	0.502246	1.49143	0.0108618	0.934353	0.693131
Q8AYF3	Cathepsin (Fragment) OS=Danio rerio GN=ctsl1a PE=2 SV=1 - [Q8AYF3_DANRE]	35.2505	6.7124	4.52	2	20	catalytic activity		metabolic process	Pf00112; Pf08246	1.58127	1.44631	1.71702	0.914649	0.695901	1.08585	0.359551
Q6P2A9	Far upstream element (FUSE) binding protein 1 OS=Danio rerio GN=fubp1 PE=2 SV=1 - [Q6P2A9_DANRE]	66.6846	7.62061	4.52	2	2	RNA binding			Pf00013	1.29059	1.06278	0.985275	0.823483	0.268276	0.763429	0.0456021
D3ZNA2	Sec1 family domain-containing protein 1 OS=Rattus norvegicus GN=Scfd1 PE=2 SV=1 - [D3ZNA2_RAT]	67.3044	5.84619	4.54	2	6			transport	Pf00995	0.831635	0.782875	0.701593	0.941368	0.845818	0.84363	0.227913
P11466	Peroxisomal carnitine O-octanoyltransferase OS=Rattus norvegicus GN=Crot PE=1 SV=3 - [OCTC_RAT]	70.2573	6.72705	4.58	2	2	protein binding; catalytic activity	cytoplasm; mitochondrion	transport; metabolic process; response to stimulus	Pf00755	1.12832	1.0193	0.869325	0.903377	0.634474	0.770461	0.0540742
Q6NX98	Suppression of tumorigenicity 13 (Colon carcinoma) (Hsp70 interacting protein) OS=Danio rerio GN=st13 PE=2 SV=1 - [Q6NX98_DANRE]	39.8356	5.26221	4.7	2	1	protein binding			Pf00515	1.07542	0.97207	1.07176	0.903895	0.63726	0.996592	0.892768
E7FAN5	Uncharacterized protein OS=Danio rerio GN=f2 PE=3 SV=1 - [E7FAN5_DANRE]	71.774	7.45947	4.72	3	3	catalytic activity; metal ion binding	extracellular	metabolic process; coagulation; response to stimulus	Pf00051; Pf00089; Pf00594; Pf09342; Pf09396	1.12746	1.0428	1.13784	0.924909	0.752935	1.00921	0.803058
F1R349	Uncharacterized protein OS=Danio rerio GN=abcd3a PE=2 SV=1 - [F1R349_DANRE]	74.9711	9.43701	4.73	3	2	nucleotide binding; catalytic activity; transporter activity	membrane	metabolic process; transport	Pf00005; Pf06472	1.46381	1.26244	1.43176	0.862433	0.428468	0.978106	0.975125
I1ZID5	Ubiquilin-1 OS=Schmidtea mediterranea PE=2 SV=1 - [I1ZID5_SCHMD]	57.8627	5.47803	4.74	2	1				Pf00240; Pf11976	1.88849	1.81188	1.99399	0.959433	0.948329	1.05586	0.508554
A0JMP7	Zgc:154106 OS=Danio rerio GN=mccc1 PE=2 SV=1 - [A0JMP7_DANRE]	77.9933	6.56592	4.78	2	4	catalytic activity; nucleotide binding; metal ion binding		metabolic process	Pf00289; Pf00364; Pf01071; Pf02222; Pf02655; Pf02785; Pf02786; Pf07478; Pf08443	1.20774	1.83107	1.22762	1.51612	0.00819386	1.01646	0.753017
Q5RKI0	WD repeat-containing protein 1 OS=Rattus norvegicus GN=Wdr1 PE=1 SV=3 - [WDR1_RAT]	66.1399	6.62451	4.79	3	1	protein binding	cytoplasm; cytoskeleton		Pf00400; Pf04762; Pf08662	0.773999	0.661247	0.743952	0.854324	0.391859	0.96118	0.865158
F1LM66	Protein Eftud2 OS=Rattus norvegicus GN=Eftud2 PE=2 SV=1 - [F1LM66_RAT]	109.408	4.99561	4.84	3	5	nucleotide binding; catalytic activity	nucleus; organelle lumen; cytoplasm; spliceosomal complex	metabolic process	Pf00009; Pf00679; Pf03144; Pf03764	0.895859	0.802535	1.04647	0.895827	0.594252	1.16812	0.113753
Q08CB4	Zgc:153296 OS=Danio rerio GN=dak PE=2 SV=1 - [Q08CB4_DANRE]	59.7219	6.99072	4.86	3	2	catalytic activity; nucleotide binding		metabolic process	Pf02733; Pf02734	1.11253	1.21753	0.961595	1.09438	0.471209	0.864332	0.310952
I1ZI73	Peptidyl prolyl cis trans isomerase FKBP-1 OS=Schmidtea mediterranea PE=2 SV=1 - [I1ZI73_SCHMD]	48.0541	5.40186	4.88	2	1	catalytic activity		metabolic process	Pf00254	1.43839	1.4129	1.45913	0.982276	0.934021	1.01441	0.767013
F1QP35	Uncharacterized protein (Fragment) OS=Danio rerio GN=si:dkey-222h21.3 PE=4 SV=3 - [F1QP35_DANRE]	82.4762	6.39209	4.88	2	190				Pf05729	1.46813	1.51659	1.67228	1.03301	0.70399	1.13905	0.176378
D4A0D1	Dynamin-3 OS=Rattus norvegicus GN=Dnm3 PE=2 SV=1 - [D4A0D1_RAT]	96.5613	8.35303	4.9	3	15	nucleotide binding; catalytic activity; protein binding		metabolic process	Pf00169; Pf00350; Pf01031; Pf02212	1.7995	1.77503	1.89693	0.986399	0.91439	1.05414	0.518114
G3V6L4	Kinesin family member 5C (Predicted) OS=Rattus norvegicus GN=Kif5c PE=3 SV=1 - [G3V6L4_RAT]	109.115	6.18896	4.92	4	12	nucleotide binding; catalytic activity; motor activity; protein binding	cytoplasm; cytoskeleton	cellular component movement; cell differentiation; cell organization and biogenesis; development; response to stimulus	Pf00225; Pf12128	1.78112	1.50123	1.79867	0.842858	0.342918	1.00986	0.798514
E9QI62	Uncharacterized protein OS=Danio rerio GN=flna PE=2 SV=1 - [E9QI62_DANRE]	272.38	5.75732	4.94	3	4	protein binding	membrane		Pf00307; Pf00630	1.70268	1.57183	1.40308	0.923151	0.743101	0.824041	0.163821
A7MC16	Zgc:171945 protein OS=Danio rerio GN=cyp2aa12 PE=2 SV=1 - [A7MC16_DANRE]	57.1343	7.03467	4.99	2	20	catalytic activity; metal ion binding		metabolic process	Pf00067	1.37398	1.21863	1.29644	0.886937	0.548031	0.943571	0.751509
Q5RGX8	Glycogen synthase 2 OS=Danio rerio GN=gys2 PE=2 SV=1 - [Q5RGX8_DANRE]	80.5301	6.56592	4.99	3	3	catalytic activity	cytoplasm; cytosol; cytoskeleton	metabolic process; response to stimulus	Pf00534; Pf05693	1.09512	0.987534	1.37883	0.901756	0.625768	1.25907	0.0235385
O35796	Complement component 1 Q subcomponent-binding protein, mitochondrial OS=Rattus norvegicus GN=C1qbp PE=1 SV=2 - [C1QBP_RAT]	30.9775	4.86865	5.02	2	1	protein binding	extracellular; nucleus; cytoplasm; mitochondrion; organelle lumen; membrane	response to stimulus	Pf02330	0.377714	0.267129	0.313961	0.707226	0.0319411	0.831213	0.185665
F1QMP5	Uncharacterized protein OS=Danio rerio GN=si:dkeyp-88f5.1 PE=2 SV=1 - [F1QMP5_DANRE]	272.17	5.84619	5.05	5	2	transporter activity	membrane	transport	Pf01347; Pf06448; Pf09172	1.23421	1.3152	1.19582	1.06562	0.573183	0.968902	0.915372
F6NMD4	Uncharacterized protein OS=Danio rerio GN=si:ch211-288g17.4 PE=4 SV=1 - [F6NMD4_DANRE]	61.4313	5.79541	5.1	2	1	catalytic activity		metabolic process		1.68342	1.38094	1.79081	0.820316	0.257078	1.06379	0.465831
Q6DG20	Zgc:153860 protein (Fragment) OS=Danio rerio GN=slc27a1b PE=2 SV=1 - [Q6DG20_DANRE]	69.9156	8.14795	5.1	3	1	catalytic activity		metabolic process	Pf00501	0.834357	0.990895	0.936414	1.18762	0.228995	1.12232	0.223542
F1QUV7	Uncharacterized protein (Fragment) OS=Danio rerio GN=gars PE=2 SV=1 - [F1QUV7_DANRE]	86.2649	7.15186	5.1	3	2	nucleotide binding; catalytic activity	cytoplasm; membrane	metabolic process	Pf00458; Pf00587; Pf03129	0.896047	0.979881	1.014	1.09356	0.473945	1.13163	0.196199
Q9W7R9	Alpha1 type II collagen OS=Cynops pyrrhogaster PE=2 SV=1 - [Q9W7R9_CYNPY]	134.984	7.84033	5.15	6	10	structural molecule activity	extracellular		Pf01391; Pf01410	0.439072	0.813531	0.606206	1.85284	0.000129449	1.38065	0.00190668
Q5PRD9	Zgc:101540 OS=Danio rerio GN=zgc:101540 PE=2 SV=1 - [Q5PRD9_DANRE]	69.8722	8.104	5.16	3	2	catalytic activity		metabolic process	Pf00501	1.02072	1.10589	1.08553	1.08345	0.50845	1.0635	0.467364
F1RE17	Uncharacterized protein OS=Danio rerio GN=acad11 PE=2 SV=1 - [F1RE17_DANRE]	85.5815	8.07471	5.2	3	2	catalytic activity		metabolic process	Pf00441; Pf01636; Pf02770; Pf02771; Pf02958; Pf08028	1.09873	1.01373	1.13907	0.92264	0.740246	1.03671	0.621053
D4A8P9	Uncharacterized protein OS=Rattus norvegicus PE=3 SV=1 - [D4A8P9_RAT]	113.973	7.18115	5.25	4	1	nucleotide binding; catalytic activity	cytoplasm; mitochondrion; membrane	metabolic process; regulation of biological process	Pf00133; Pf06827; Pf08264; Pf09334	1.56152	1.13732	1.22065	0.728341	0.0518383	0.781706	0.0701142
A0AUR3	Cel.2 protein OS=Danio rerio GN=cel.2 PE=2 SV=1 - [A0AUR3_DANRE]	60.3864	6.55127	5.27	2	4	catalytic activity	extracellular; cytoplasm; cytosol	metabolic process	Pf00135; Pf07859	1.02492	1.16007	1.0292	1.13186	0.357987	1.00418	0.838448
D4A1F1	Transferrin receptor protein 2 OS=Rattus norvegicus GN=Tfr2 PE=2 SV=1 - [D4A1F1_RAT]	79.0892	6.30322	5.31	3	2	catalytic activity	membrane	metabolic process	Pf02225; Pf04253; Pf04389	0.487981	0.463336	0.517655	0.949497	0.891973	1.06081	0.481615
P19527	Neurofilament light polypeptide OS=Rattus norvegicus GN=Nefl PE=1 SV=3 - [NFL_RAT]	61.298	4.65283	5.35	2	21	catalytic activity; motor activity; structural molecule activity; protein binding	cytoskeleton; cytoplasm; cytosol	cell organization and biogenesis; response to stimulus; cellular component movement; transport; cell differentiation; development; regulation of biological process; cell death	Pf00038; Pf01576; Pf12128	0.684721	0.940307	0.777744	1.37327	0.0393941	1.13586	0.184705
G3V8G2	Proteasome (Prosome, macropain) 26S subunit, non-ATPase, 5 (Predicted), isoform CRA_a OS=Rattus norvegicus GN=Psmd5 PE=4 SV=1 - [G3V8G2_RAT]	55.8179	5.2749	5.36	2	1	protein binding	proteasome	metabolic process	Pf10508	1.14538	1.23123	1.18708	1.07496	0.538661	1.03641	0.622933
Q6NZU0	Heat shock protein 4 OS=Danio rerio GN=hspa4b PE=2 SV=1 - [Q6NZU0_DANRE]	94.6724	5.16064	5.36	2	3	nucleotide binding		cell organization and biogenesis; response to stimulus	Pf00012; Pf06723	1.06379	0.806566	1.06657	0.758201	0.0948376	1.00262	0.849541
D3ZVQ0	Ubiquitin carboxyl-terminal hydrolase OS=Rattus norvegicus GN=Usp5 PE=3 SV=1 - [D3ZVQ0_RAT]	95.7183	5.0083	5.36	5	3	catalytic activity; protein binding; metal ion binding		metabolic process; regulation of biological process	Pf00443; Pf00627; Pf02148	1.58806	1.3516	1.67556	0.851102	0.377762	1.0551	0.512795
F1R416	Adenylosuccinate synthetase OS=Danio rerio GN=adssl PE=2 SV=1 - [F1R416_DANRE]	50.582	7.6792	5.41	2	3	nucleotide binding; metal ion binding; catalytic activity	cytoplasm	metabolic process	Pf00709	1.09251	1	1.10289	0.915321	0.699608	1.0095	0.801029
F1QTP9	Uncharacterized protein (Fragment) OS=Danio rerio PE=4 SV=1 - [F1QTP9_DANRE]	62.08	5.23682	5.43	3	1	catalytic activity		metabolic process	Pf01735	1.36152	1.21167	1.30055	0.88994	0.563496	0.955223	0.826513
P38650	Cytoplasmic dynein 1 heavy chain 1 OS=Rattus norvegicus GN=Dync1h1 PE=1 SV=1 - [DYHC1_RAT]	531.916	6.45557	5.45	23	5	nucleotide binding; catalytic activity; motor activity; protein binding	cytoplasm; Golgi; cytoskeleton	metabolic process; transport; cellular component movement; cell organization and biogenesis	Pf03028; Pf04156; Pf07246; Pf07728; Pf08385; Pf08393; Pf12774; Pf12775; Pf12777; Pf12780; Pf12781	1.49141	1.47225	1.54413	0.98715	0.910828	1.03535	0.629565
Q86M46	Intermediate filament protein OS=Dugesia japonica GN=Djf-1 PE=2 SV=1 - [Q86M46_DUGJA]	66.034	6.52197	5.46	2	2	structural molecule activity	extracellular; cytoskeleton	transport; metabolic process	Pf00038; Pf00932; Pf01442	1.36864	1.13001	1.33749	0.825644	0.276081	0.977244	0.969543
Q6NSN5	Adenylosuccinate synthetase isozyme 1 OS=Danio rerio GN=adssl1 PE=1 SV=1 - [PURA1_DANRE]	50.342	8.48486	5.48	2	1	nucleotide binding; metal ion binding; catalytic activity	cytoplasm	metabolic process	Pf00709	0.42393	0.508081	0.842977	1.1985	0.208826	1.98848	1.29402e-10
G3V7I6	O-acyltransferase OS=Rattus norvegicus GN=Soat2 PE=3 SV=1 - [G3V7I6_RAT]	60.5299	8.57275	5.53	2	3	catalytic activity	cytoplasm; endoplasmic reticulum; membrane	response to stimulus; metabolic process; transport; cell organization and biogenesis; regulation of biological process	Pf03062	1.08425	0.924895	1.27555	0.853024	0.386141	1.17643	0.0997276
I1ZI94	Glucose-6-phosphate 1-dehydrogenase (Fragment) OS=Schmidtea mediterranea PE=2 SV=1 - [I1ZI94_SCHMD]	57.7369	8.04541	5.59	2	1	nucleotide binding; catalytic activity		metabolic process	Pf00479; Pf02781	1.6893	1.59285	1.72693	0.942905	0.854537	1.02228	0.713902
Q6PH34	Nop56 protein (Fragment) OS=Danio rerio GN=nop56 PE=2 SV=1 - [Q6PH34_DANRE]	52.83	8.99756	5.61	2	7			development	Pf01798; Pf08060; Pf08156	1.2119	1.10399	1.71861	0.910959	0.67563	1.41811	0.000813179
I3NN31	Collagen type I alpha 2 OS=Ambystoma mexicanum GN=col1a2 PE=4 SV=1 - [I3NN31_AMBME]	127.673	8.73389	5.65	6	1	structural molecule activity	extracellular		Pf01391; Pf01410	0.457284	0.767627	0.573268	1.67866	0.00117466	1.25364	0.0260669
Q45QL4	Guanine nucleotide binding protein beta 3 (Fragment) OS=Rattus norvegicus GN=Gnb3 PE=2 SV=1 - [Q45QL4_RAT]	34.1125	5.97314	5.75	2	3	signal transducer activity; protein binding			Pf00400	1.90122	1.9505	2.08239	1.02592	0.734371	1.09529	0.319676
F1M9V7	Protein Npepps OS=Rattus norvegicus GN=Npepps PE=2 SV=1 - [F1M9V7_RAT]	103.279	5.77002	5.76	4	3	catalytic activity; metal ion binding		metabolic process; response to stimulus	Pf01433	1.49455	1.45495	1.84595	0.973502	0.976197	1.23512	0.0366469
A4QNV1	6-phosphofructokinase OS=Danio rerio GN=pfkmb PE=2 SV=1 - [A4QNV1_DANRE]	84.1119	7.79639	5.8	2	4	nucleotide binding; catalytic activity	cytoplasm; cytosol	metabolic process	Pf00365	1.32697	1.72227	1.46633	1.29789	0.0841831	1.10502	0.282088
F1QU85	Uncharacterized protein OS=Danio rerio GN=si:ch211-14a17.10 PE=2 SV=1 - [F1QU85_DANRE]	125.641	5.2876	5.8	5	2				Pf12128	1.04086	1.03448	0.984006	0.993873	0.879152	0.945376	0.763059
A0JPQ8	Alkylglycerol monooxygenase OS=Rattus norvegicus GN=Agmo PE=2 SV=1 - [ALKMO_RAT]	51.6646	7.62061	5.82	2	1	metal ion binding; catalytic activity	cytoplasm; endoplasmic reticulum; membrane	metabolic process	Pf04116	0.700385	0.59934	0.572352	0.85573	0.398089	0.817197	0.144684
Q6IFW5	Keratin, type I cytoskeletal 12 OS=Rattus norvegicus GN=Krt12 PE=2 SV=1 - [K1C12_RAT]	48.79	4.76709	5.92	2	3	catalytic activity; motor activity; structural molecule activity	cytoskeleton	development	Pf00038; Pf01576; Pf12128	0.264464	0.572074	0.54087	2.16315	2.1243e-06	2.04516	2.32665e-11
Q91145	Collagen alpha-1(XII) chain (Fragment) OS=Notophthalmus viridescens PE=2 SV=1 - [COCA1_NOTVI]	101.585	5.45264	5.92	5	1	protein binding	extracellular		Pf00041; Pf00092	0.679758	1.18198	0.916494	1.73883	0.000554919	1.34826	0.00387524
Q6IG09	Protein Krt85 OS=Rattus norvegicus GN=Krt85 PE=2 SV=1 - [Q6IG09_RAT]	53.2672	6.72705	5.93	2	16	structural molecule activity	cytoskeleton		Pf00038	0.151659	0.284093	0.328969	1.87324	9.93744e-05	2.16914	5.19611e-13
D3ZIN5	Protein RGD1308772 OS=Rattus norvegicus GN=Vwa8 PE=4 SV=1 - [D3ZIN5_RAT]	213.63	6.87354	5.93	10	3	nucleotide binding; protein binding; catalytic activity	cytoplasm; mitochondrion; membrane	metabolic process	Pf00092; Pf07728; Pf12128	0.396273	0.274948	0.547023	0.693833	0.0228728	1.38042	0.0019166
A2Q0R5	Putative indoleamine 2,3-dioxygenase OS=Danio rerio GN=ido1 PE=2 SV=1 - [A2Q0R5_DANRE]	48.9182	6.3667	5.98	2	2	catalytic activity			Pf01231	1.35478	1.2805	1.54142	0.945174	0.867419	1.13776	0.179695
F8W4C0	Uncharacterized protein OS=Danio rerio GN=sptbn2 PE=4 SV=1 - [F8W4C0_DANRE]	269.679	5.36377	5.99	5	2	protein binding; structural molecule activity	cytoplasm; cytoskeleton; membrane		Pf00169; Pf00307; Pf00435; Pf11971; Pf12128	1.11486	1.03548	1.23388	0.928793	0.774733	1.10675	0.275741
D5JG81	Vasa PlVAS1-like protein (Fragment) OS=Dugesia japonica GN=VAS-1 PE=2 SV=1 - [D5JG81_DUGJA]	92.8235	8.52881	6.23	4	2	nucleotide binding; catalytic activity	membrane		Pf00270; Pf00271	2.12175	1.90509	1.92725	0.897888	0.605148	0.908334	0.535983
A5PMZ3	Uncharacterized protein OS=Danio rerio GN=scinlb PE=4 SV=1 - [A5PMZ3_DANRE]	79.4167	6.45557	6.25	3	2	protein binding			Pf00626	1.02765	1.10004	0.953899	1.07044	0.555212	0.928231	0.655006
P30835	6-phosphofructokinase, liver type OS=Rattus norvegicus GN=Pfkl PE=2 SV=3 - [K6PL_RAT]	85.2844	7.40088	6.28	2	2	nucleotide binding; catalytic activity; protein binding; metal ion binding	cytoplasm; cytosol	metabolic process; response to stimulus; cell communication; regulation of biological process; transport; cell organization and biogenesis	Pf00365	1.15743	0.70428	1.31442	0.608489	0.00152006	1.13564	0.185272
E7F022	Uncharacterized protein OS=Danio rerio GN=xdh PE=4 SV=1 - [E7F022_DANRE]	148.078	6.55127	6.29	6	6	catalytic activity; metal ion binding		metabolic process	Pf00111; Pf00941; Pf01315; Pf01799; Pf02738; Pf03450	1.26285	1.14131	1.28447	0.903753	0.636499	1.01712	0.74858
E7FGK9	Uncharacterized protein OS=Danio rerio GN=ogdhl PE=4 SV=1 - [E7FGK9_DANRE]	114.89	6.66846	6.35	2	1	catalytic activity		metabolic process	Pf00676; Pf02779	1.60224	1.7376	1.61862	1.08448	0.504833	1.01022	0.79597
D5JG82	GTPase activating protein OS=Dugesia japonica PE=2 SV=1 - [D5JG82_DUGJA]	43.3245	6.02393	6.37	2	2	nucleotide binding		transport	Pf00076; Pf02136	1.89908	1.70236	1.98917	0.896412	0.597336	1.04744	0.556449
Q23960	Y-box protein OS=Dugesia japonica PE=2 SV=1 - [Q23960_DUGJA]	30.3849	9.59814	6.39	2	1	DNA binding		metabolic process; regulation of biological process	Pf00313	2.58399	2.70694	2.55103	1.04758	0.64365	0.987243	0.96097
Q1JUB4	Contactin/TAG-1 cell adhesion molecule OS=Dugesia japonica GN=DjCTCAM PE=2 SV=1 - [Q1JUB4_DUGJA]	129.497	7.37158	6.4	6	1	protein binding			Pf00041; Pf00047; Pf07679; Pf07686	2.13144	1.98951	2.25296	0.933413	0.800774	1.05701	0.502211
O73756	Complement component BfB (Fragment) OS=Danio rerio GN=bfb PE=2 SV=1 - [O73756_DANRE]	40.8514	5.5542	6.41	2	8	protein binding			Pf00084; Pf00092	0.76922	0.871472	0.874168	1.13293	0.355079	1.13643	0.183176
A2BFN6	Uncharacterized protein OS=Danio rerio GN=hmbsa PE=3 SV=1 - [A2BFN6_DANRE]	38.9755	7.13721	6.42	2	10	catalytic activity		metabolic process	Pf01379; Pf03900	0.66231	0.745411	1.15088	1.12547	0.375722	1.73768	1.99669e-07
I1ZIJ8	FERM domain containing-1 (Fragment) OS=Schmidtea mediterranea PE=2 SV=1 - [I1ZIJ8_SCHMD]	59.7386	6.32861	6.55	4	1	protein binding	cytoplasm; cytoskeleton; membrane		Pf00373; Pf00769; Pf09380	2.16736	1.96588	2.29697	0.907043	0.654283	1.0598	0.487021
Q6DI20	Dipeptidylpeptidase 3 OS=Danio rerio GN=dpp3 PE=2 SV=1 - [Q6DI20_DANRE]	81.8248	5.16064	6.6	3	1	catalytic activity	cytoplasm	metabolic process	Pf03571	1.59942	1.31515	1.4125	0.822268	0.263947	0.883133	0.3996
F1QL44	Uncharacterized protein OS=Danio rerio GN=flncb PE=2 SV=1 - [F1QL44_DANRE]	294.373	5.73193	6.6	4	4	protein binding	membrane	cell organization and biogenesis	Pf00307; Pf00630	1.64744	1.49656	1.61909	0.908415	0.661741	0.982792	0.993794
B0S739	Uncharacterized protein OS=Danio rerio GN=si:dkey-4e7.3 PE=4 SV=1 - [B0S739_DANRE]	34.5425	5.66846	6.62	2	3				Pf01156	0.993217	1.0115	1.03941	1.01841	0.767278	1.04651	0.561878
F1QQ87	Uncharacterized protein OS=Danio rerio GN=apobb PE=2 SV=1 - [F1QQ87_DANRE]	412.436	5.23682	6.62	20	3	transporter activity	membrane	transport	Pf01347; Pf06448; Pf09172	0.974857	0.987068	0.995354	1.01253	0.793501	1.02103	0.722242
A9JSU3	Fads2 protein OS=Danio rerio GN=fads2 PE=2 SV=1 - [A9JSU3_DANRE]	49.4519	8.80713	6.65	2	3	metal ion binding; catalytic activity	cytoplasm; endoplasmic reticulum; membrane	metabolic process; transport	Pf00173; Pf00487; Pf09818	1.18333	1.20072	1.27079	1.01469	0.783782	1.07391	0.414774
P17712	Glucokinase OS=Rattus norvegicus GN=Gck PE=1 SV=2 - [HXK4_RAT]	52.0826	5.24951	6.67	2	2	nucleotide binding; metal ion binding; catalytic activity; protein binding	nucleus; organelle lumen; cytoplasm; mitochondrion; cytosol; cytoskeleton	cellular homeostasis; metabolic process; response to stimulus; cell communication; regulation of biological process; transport	Pf00349; Pf03727	1.19482	1.57723	1.25497	1.32005	0.0677252	1.05034	0.53966
F1M110	Glycylpeptide N-tetradecanoyltransferase (Fragment) OS=Rattus norvegicus GN=Nmt2 PE=2 SV=1 - [F1M110_RAT]	55.5501	9.42236	6.69	3	10	catalytic activity		metabolic process	Pf01233; Pf02799	1.19013	1.1154	1.25495	0.937202	0.822205	1.05446	0.516351
Q66HY4	Zgc:92214 OS=Danio rerio GN=cyp8b3 PE=2 SV=1 - [Q66HY4_DANRE]	51.7478	6.63916	6.7	2	4	catalytic activity; metal ion binding		metabolic process	Pf00067	1.04429	1.15753	1.36167	1.10844	0.426129	1.30392	0.0097804
A8E5E5	Annexin OS=Danio rerio GN=anxa3b PE=2 SV=1 - [A8E5E5_DANRE]	37.6163	5.24951	6.76	2	4	enzyme regulator activity; metal ion binding			Pf00191	1.34154	1.12817	1.20834	0.840952	0.335115	0.900713	0.492838
F1QAK5	Uncharacterized protein OS=Danio rerio GN=nt5c2b PE=3 SV=1 - [F1QAK5_DANRE]	65.0562	5.85889	6.76	3	3	metal ion binding			Pf05761	1.01886	1.04072	0.955782	1.02146	0.753837	0.938087	0.716653
B8JLZ4	Uncharacterized protein OS=Danio rerio GN=pmpca PE=4 SV=1 - [B8JLZ4_DANRE]	57.5522	7.37158	6.77	2	2	catalytic activity; metal ion binding	membrane	metabolic process	Pf00675; Pf05193	1.2541	1.36717	1.44293	1.09016	0.48535	1.15057	0.148828
F1LMW6	Protein Psmd14 (Fragment) OS=Rattus norvegicus GN=Psmd14 PE=2 SV=1 - [F1LMW6_RAT]	32.9027	6.40479	6.8	2	4	protein binding; enzyme regulator activity		metabolic process; regulation of biological process	Pf01398	0.943536	0.988868	0.895277	1.04804	0.641778	0.948853	0.785379
Q64HD0	Sex hormone binding globulin OS=Danio rerio GN=shbg PE=2 SV=1 - [Q64HD0_DANRE]	42.0446	5.90967	6.82	2	1				Pf00054; Pf02210	1.13597	1.29074	1.09481	1.13625	0.346162	0.963768	0.881985
G3V8L9	Polymerase I and transcript release factor OS=Rattus norvegicus GN=Ptrf PE=4 SV=1 - [G3V8L9_RAT]	43.882	5.51611	6.89	2	5	RNA binding; transcription regulator activity	membrane; nucleus; cytoplasm; mitochondrion; endoplasmic reticulum; cytosol	metabolic process; regulation of biological process; cell organization and biogenesis		1.43132	1.28565	1.49112	0.89822	0.606911	1.04178	0.590051
G8JLT0	Nucleobindin-1 OS=Rattus norvegicus GN=Nucb1 PE=4 SV=1 - [G8JLT0_RAT]	44.3462	5.18604	6.9	2	3	metal ion binding				0.750542	0.533943	0.43253	0.711411	0.0352997	0.576291	2.31351e-05
F8W5T8	Uncharacterized protein OS=Danio rerio GN=zgc:152945 PE=2 SV=1 - [F8W5T8_DANRE]	49.3519	6.25244	6.9	2	3	metal ion binding			Pf00045	1.37426	1.05608	1.45085	0.768471	0.114417	1.05573	0.509282
F1QVH2	Uncharacterized protein OS=Danio rerio GN=ppp2r5cb PE=4 SV=1 - [F1QVH2_DANRE]	49.2894	6.53662	6.9	3	14	enzyme regulator activity		cell communication; regulation of biological process; response to stimulus	Pf01603	1.5107	1.3147	1.60043	0.870258	0.465265	1.0594	0.489222
Q6P3G1	Ceruloplasmin OS=Danio rerio GN=cp PE=2 SV=1 - [Q6P3G1_DANRE]	124.306	6.87354	6.9	6	3	metal ion binding; catalytic activity		metabolic process	Pf07731; Pf07732	1.03509	1.0797	1.22412	1.0431	0.661881	1.18262	0.0902735
Q91Y81	Septin-2 OS=Rattus norvegicus GN=Sept2 PE=1 SV=1 - [SEPT2_RAT]	41.5663	6.59521	6.93	2	12	nucleotide binding; catalytic activity; enzyme regulator activity; protein binding; structural molecule activity	cytoplasm; nucleus; organelle lumen; cytoskeleton; membrane; cell surface	regulation of biological process; transport; metabolic process; cell organization and biogenesis; cell communication; response to stimulus; cell differentiation; development; cell division	Pf00071; Pf00735	1.04276	1.67546	1.03072	1.60676	0.00282076	0.988457	0.952051
Q803W1	Secernin-3 OS=Danio rerio GN=scrn3 PE=2 SV=1 - [SCRN3_DANRE]	46.9438	5.10986	6.95	2	2	catalytic activity		metabolic process	Pf03577	0.834021	0.603579	0.735766	0.723697	0.0468002	0.882191	0.394873
F1QKS4	Uncharacterized protein OS=Danio rerio GN=canx PE=2 SV=1 - [F1QKS4_DANRE]	67.8326	4.50049	7	3	2	metal ion binding; protein binding	cytoplasm; endoplasmic reticulum	metabolic process	Pf00262; Pf10136	1.13475	1.32085	1.07809	1.164	0.278167	0.950071	0.793226
A5HUF2	Adaptor-related protein complex 2 mu 2 subunit OS=Dugesia japonica GN=Djmu2 PE=2 SV=1 - [A5HUF2_DUGJA]	50.4802	9.5835	7.01	2	1	protein binding	cytoplasm; membrane	transport	Pf00928; Pf01217	1.52367	1.49231	1.71616	0.979415	0.947718	1.12633	0.211408
F1LQ09	Protein Atl2 OS=Rattus norvegicus GN=Atl2 PE=2 SV=1 - [F1LQ09_RAT]	66.1531	5.5415	7.03	2	2	catalytic activity; nucleotide binding; protein binding	cytoplasm; endoplasmic reticulum; membrane	metabolic process; transport; cell organization and biogenesis	Pf02263	0.755445	0.642678	0.65118	0.850728	0.376145	0.861982	0.300737
Q66WT9	Clathrin-assembly lymphoid myeloid leukemia protein OS=Rattus norvegicus GN=Picalm PE=2 SV=1 - [Q66WT9_RAT]	64.6731	9.01221	7.04	3	25	protein binding	nucleus; cytoplasm; endosome; Golgi; membrane; cytoskeleton	transport; cell differentiation; cell organization and biogenesis; development; regulation of biological process; metabolic process	Pf01417; Pf07651	0.606764	0.612384	0.661671	1.00926	0.808232	1.09049	0.33953
D4A9D6	DEAH (Asp-Glu-Ala-His) box polypeptide 9 (Predicted) OS=Rattus norvegicus GN=Dhx9 PE=4 SV=1 - [D4A9D6_RAT]	131.647	6.354	7.07	6	3	nucleotide binding; protein binding; RNA binding; catalytic activity	nucleus; organelle lumen; cytoplasm; cytoskeleton	response to stimulus; metabolic process; regulation of biological process	Pf00035; Pf00270; Pf00271; Pf04408; Pf07717	1.34644	1.18391	1.24181	0.879289	0.50939	0.92229	0.61862
G3V9E4	Acylamino-acid-releasing enzyme OS=Rattus norvegicus GN=Apeh PE=4 SV=1 - [G3V9E4_RAT]	81.3154	5.73193	7.24	4	2	catalytic activity	cytoplasm; membrane; nucleus	metabolic process	Pf00326; Pf00561; Pf01738; Pf05448; Pf12695; Pf12697	1.00168	1.144	1.05306	1.14209	0.330907	1.0513	0.53416
Q1LYJ2	Novel protein OS=Danio rerio GN=si:dkeyp-89c11.1 PE=4 SV=1 - [Q1LYJ2_DANRE]	45.9331	6.72705	7.28	3	9	catalytic activity		metabolic process	Pf01738; Pf04775; Pf08840; Pf12697	1.25552	1.35274	1.39216	1.07743	0.529736	1.10883	0.268273
Q99J82	Integrin-linked protein kinase OS=Rattus norvegicus GN=Ilk PE=2 SV=1 - [ILK_RAT]	51.3399	8.07471	7.3	3	2	nucleotide binding; catalytic activity; signal transducer activity; protein binding	cytoskeleton; cytoplasm; membrane	cell growth; cell organization and biogenesis; regulation of biological process; development; metabolic process; cell communication; response to stimulus; cell proliferation; cell death; cellular component movement; cellular homeostasis; cell differentiation	Pf00023; Pf00069; Pf07714; Pf12796	0.527826	0.479663	0.654027	0.908753	0.663581	1.2391	0.0340961
A1L1R7	Aldehyde dehydrogenase 16 family, member A1 OS=Danio rerio GN=aldh16a1 PE=2 SV=1 - [A1L1R7_DANRE]	83.0821	6.06201	7.31	4	4	catalytic activity		metabolic process	Pf00171	0.953921	0.956122	0.849791	1.00231	0.839984	0.89084	0.439325
Q5EAP4	Guanine nucleotide binding protein, alpha 14 OS=Rattus norvegicus GN=Gna14 PE=2 SV=1 - [Q5EAP4_RAT]	41.4152	6.30322	7.32	3	17	nucleotide binding; protein binding; catalytic activity; signal transducer activity	membrane	metabolic process; cell communication; regulation of biological process; response to stimulus	Pf00025; Pf00503	1.84473	1.5766	1.97823	0.854653	0.393312	1.07237	0.422314
F1M4A0	Protein Tjp1 (Fragment) OS=Rattus norvegicus GN=Tjp1 PE=4 SV=1 - [F1M4A0_RAT]	195.251	6.58057	7.34	9	4	protein binding	nucleus; cytoplasm; Golgi; membrane	development; response to stimulus; cellular homeostasis	Pf00595; Pf00625; Pf00791; Pf07653	0.826478	0.858703	0.945322	1.03899	0.678859	1.1438	0.164571
E9QH31	Aldehyde dehydrogenase OS=Danio rerio GN=aldh3a2b PE=3 SV=2 - [E9QH31_DANRE]	55.0244	8.6167	7.35	2	2	catalytic activity	membrane	metabolic process	Pf00171; Pf05893	0.671911	0.519911	0.67608	0.773778	0.125597	1.0062	0.824125
P61621	Protein transport protein Sec61 subunit alpha isoform 1 OS=Rattus norvegicus GN=Sec61a1 PE=2 SV=2 - [S61A1_RAT]	52.2305	8.06006	7.35	4	6	transporter activity	cytoplasm; endoplasmic reticulum; membrane	transport; defense response; response to stimulus	Pf00344; Pf10559	0.673879	0.588401	0.714335	0.873155	0.479233	1.06004	0.48578
B0JZJ9	Zgc:113194 protein OS=Danio rerio GN=acss1 PE=2 SV=1 - [B0JZJ9_DANRE]	76.6499	7.63525	7.36	3	3	catalytic activity; nucleotide binding		metabolic process	Pf00501; Pf11930	0.998843	0.922821	0.941011	0.923891	0.747238	0.942102	0.74214
P35559	Insulin-degrading enzyme OS=Rattus norvegicus GN=Ide PE=1 SV=1 - [IDE_RAT]	117.635	6.60986	7.36	7	4	nucleotide binding; protein binding; catalytic activity; metal ion binding	extracellular; nucleus; cytoplasm; mitochondrion; organelle lumen; cytosol; membrane; cell surface; proteasome	metabolic process; development; cellular homeostasis; cell organization and biogenesis; regulation of biological process	Pf00675; Pf05193	0.420169	0.354311	0.403297	0.843258	0.344566	0.959844	0.85648
Q6DH98	CNDP dipeptidase 2 (Metallopeptidase M20 family) OS=Danio rerio GN=cndp2 PE=2 SV=1 - [Q6DH98_DANRE]	53.1778	5.66846	7.38	2	1	catalytic activity		metabolic process	Pf01546; Pf07687	1.53512	1.83898	1.86726	1.19794	0.209831	1.21637	0.0511445
B3DFN3	Lamin B2 OS=Danio rerio GN=lmnb2 PE=2 SV=1 - [B3DFN3_DANRE]	65.8935	5.26221	7.38	4	2	catalytic activity; motor activity; structural molecule activity	nucleus; cytoskeleton		Pf00038; Pf00932; Pf01576; Pf12128	1.21059	1.26572	1.22087	1.04554	0.651932	1.00849	0.808034
F1LPD2	Transmembrane 9 superfamily member 2 OS=Rattus norvegicus GN=Tm9sf2 PE=2 SV=1 - [F1LPD2_RAT]	75.5024	7.44482	7.39	4	6		membrane	transport	Pf02990; Pf07690	0.947731	0.953376	0.959136	1.00596	0.823257	1.01203	0.783409
H2DL20	Bcl2-3 OS=Schmidtea mediterranea PE=2 SV=1 - [H2DL20_SCHMD]	23.0637	4.94482	7.43	2	1		membrane	cell death; regulation of biological process	Pf00452	2.16776	1.73511	2.10775	0.800418	0.193321	0.97232	0.937593
D5JG75	TIA1-like protein (Fragment) OS=Dugesia japonica GN=TIAL-1 PE=2 SV=1 - [D5JG75_DUGJA]	48.4212	7.06396	7.44	2	1	nucleotide binding	membrane		Pf00076	1.66764	1.52247	1.84272	0.912952	0.68656	1.10499	0.282189
Q6IG02	Keratin, type II cytoskeletal 2 epidermal OS=Rattus norvegicus GN=Krt2 PE=2 SV=1 - [K22E_RAT]	69.0852	7.69385	7.45	2	3	structural molecule activity	cytoplasm; Golgi; cytoskeleton	cell differentiation; development; cell proliferation; cellular component movement	Pf00038; Pf05701	1.62697	1.76119	1.82486	1.0825	0.511768	1.12163	0.225672
F1R588	Uncharacterized protein (Fragment) OS=Danio rerio GN=ephx1l PE=2 SV=1 - [F1R588_DANRE]	53.4003	8.33838	7.49	3	2	catalytic activity	membrane	metabolic process; response to stimulus	Pf00561; Pf06441; Pf12697	1.2581	1.07907	1.20253	0.857703	0.406919	0.95583	0.830442
F1LSF1	Solute carrier family 2, facilitated glucose transporter member 2 (Fragment) OS=Rattus norvegicus GN=Slc2a2 PE=2 SV=1 - [F1LSF1_RAT]	56.7286	6.93213	7.5	4	6	transporter activity	membrane	transport	Pf00083; Pf01770; Pf07690	1.03188	1.20379	0.899255	1.1666	0.272387	0.87147	0.343172
F1MAR6	Protein Prodh OS=Rattus norvegicus GN=Prodh PE=4 SV=1 - [F1MAR6_RAT]	68.0783	7.26904	7.51	3	2	catalytic activity	cytoplasm; mitochondrion; membrane	metabolic process	Pf01619	1.24605	1.27116	1.31418	1.02016	0.759554	1.05467	0.515146
E9QCG6	Uncharacterized protein OS=Danio rerio GN=col1a2 PE=2 SV=1 - [E9QCG6_DANRE]	127.193	9.36377	7.54	7	3	structural molecule activity	extracellular		Pf01391; Pf01410	0.768393	0.819428	0.755856	1.06642	0.570194	0.983684	0.987203
F1R2W1	Uncharacterized protein OS=Danio rerio GN=dhrs13a.3 PE=2 SV=1 - [F1R2W1_DANRE]	34.8821	8.17725	7.55	2	2	nucleotide binding; catalytic activity		metabolic process	Pf00106; Pf08659	1.18027	1.50805	1.13022	1.27772	0.102159	0.957599	0.84191
A8E7H0	Uncharacterized protein OS=Danio rerio GN=si:ch211-117n7.6 PE=4 SV=1 - [A8E7H0_DANRE]	38.6761	8.89502	7.56	2	1	catalytic activity			Pf00561; Pf12695; Pf12697	0.924931	0.800593	0.981445	0.865571	0.443055	1.0611	0.480067
E7FB58	NADPH:adrenodoxin oxidoreductase, mitochondrial OS=Danio rerio GN=LOC100536115 PE=3 SV=1 - [E7FB58_DANRE]	52.9744	7.59131	7.61	2	1	nucleotide binding; catalytic activity	cytoplasm; mitochondrion; organelle lumen	metabolic process	Pf07992	1.05182	0.999244	1.09805	0.950018	0.894931	1.04395	0.576994
O70371	Annexin (Fragment) OS=Rattus norvegicus GN=Anxa5 PE=2 SV=1 - [O70371_RAT]	33.9444	5.10986	7.62	2	3	metal ion binding; protein binding	cytoplasm; membrane; cell surface; extracellular	coagulation; response to stimulus; cell death; regulation of biological process; cell organization and biogenesis	Pf00191	0.792108	0.727151	0.849505	0.917996	0.714405	1.07246	0.42185
B8JIF1	Uncharacterized protein OS=Danio rerio GN=as3mt PE=4 SV=1 - [B8JIF1_DANRE]	41.5854	5.12256	7.69	2	2	catalytic activity	cytoplasm	metabolic process	Pf01135; Pf01209; Pf03848; Pf05148; Pf05175; Pf06325; Pf07021; Pf08241; Pf08242; Pf12847	1.23738	1.22951	1.22398	0.993638	0.880251	0.989166	0.946846
B2RZC6	Ilf2 protein OS=Rattus norvegicus GN=Ilf2 PE=2 SV=1 - [B2RZC6_RAT]	43.0352	5.26221	7.69	2	3	DNA binding; RNA binding; nucleotide binding; catalytic activity	nucleus; organelle lumen; cytoplasm	metabolic process; response to stimulus; regulation of biological process	Pf07528	0.726044	0.658257	0.592917	0.906635	0.652072	0.816641	0.143204
F1QZ48	Uncharacterized protein OS=Danio rerio GN=pacsin3 PE=2 SV=1 - [F1QZ48_DANRE]	44.1274	5.74463	7.69	2	4				Pf00611	1.18464	0.952976	1.004	0.804443	0.205296	0.847516	0.2423
A4V6L7	DEAD box polypeptide 48 protein (Fragment) OS=Dugesia japonica PE=2 SV=1 - [A4V6L7_DUGJA]	43.1444	7.82568	7.71	2	2	nucleotide binding; DNA binding; catalytic activity			Pf00270; Pf00271; Pf04851	1.7827	2.93376	1.79313	1.64568	0.00176077	1.00585	0.826638
A4V6L9	Fragile X mental retardation protein (Fragment) OS=Dugesia japonica PE=2 SV=1 - [A4V6L9_DUGJA]	47.5657	8.71924	7.71	3	2	RNA binding			Pf00013	1.62759	1.59888	1.60266	0.982361	0.933617	0.984683	0.979824
Q5BK17	Iodotyrosine dehalogenase 1 OS=Rattus norvegicus GN=Iyd PE=2 SV=1 - [IYD1_RAT]	32.8252	6.55127	7.72	2	1	antioxidant activity; catalytic activity	membrane	metabolic process	Pf00881	0.579017	1.05779	0.657273	1.82687	0.00018095	1.13515	0.18658
Q6P6Q7	Signal transducer and activator of transcription 1 OS=Rattus norvegicus GN=Stat1 PE=2 SV=1 - [Q6P6Q7_RAT]	83.0583	6.15088	7.72	5	4	DNA binding; signal transducer activity; protein binding; metal ion binding	nucleus; organelle lumen; cytoplasm	cell proliferation; regulation of biological process; metabolic process; cell death; cell communication; response to stimulus; development; cellular component movement; defense response	Pf00017; Pf01017; Pf02864; Pf02865	1.60819	1.50475	1.5147	0.935678	0.813577	0.941865	0.740633
F1QBA8	Uncharacterized protein (Fragment) OS=Danio rerio GN=slc27a6 PE=2 SV=1 - [F1QBA8_DANRE]	71.3945	8.104	7.73	5	2	catalytic activity	membrane	metabolic process	Pf00501	0.81894	0.728936	0.824665	0.890097	0.564307	1.00699	0.818584
F1RDM7	Uncharacterized protein OS=Danio rerio GN=LOC100537965 PE=4 SV=1 - [F1RDM7_DANRE]	44.7435	6.48096	7.75	2	5	metal ion binding; catalytic activity			Pf06079	1.39935	1.5506	1.26485	1.10808	0.427235	0.903886	0.510614
A3KP88	Atl2 protein (Fragment) OS=Danio rerio GN=atl2 PE=2 SV=1 - [A3KP88_DANRE]	67.0728	5.2749	7.76	2	6	catalytic activity; nucleotide binding		metabolic process	Pf02263	1.19852	1.39884	1.2809	1.16713	0.271203	1.06873	0.440436
Q63120	Canalicular multispecific organic anion transporter 1 OS=Rattus norvegicus GN=Abcc2 PE=2 SV=1 - [MRP2_RAT]	173.274	8.80713	7.79	10	3	nucleotide binding; transporter activity; protein binding; catalytic activity	membrane	metabolic process; transport; response to stimulus; cellular homeostasis	Pf00005; Pf00664	0.541413	0.544784	0.575763	1.00623	0.822031	1.06344	0.467665
D3ZD23	ATP-binding cassette, sub-family E (OABP), member 1 OS=Rattus norvegicus GN=Abce1 PE=3 SV=1 - [D3ZD23_RAT]	67.257	8.33838	7.85	3	4	nucleotide binding; catalytic activity	cytoplasm; mitochondrion	metabolic process	Pf00005; Pf04068	1.44613	1.30388	1.44893	0.901634	0.625115	1.00194	0.854348
Q2L6M8	Innexin7 OS=Dugesia japonica GN=inx7 PE=4 SV=1 - [Q2L6M8_DUGJA]	47.4832	8.77783	7.86	4	1				Pf00876	1.90431	1.88139	1.97299	0.987965	0.90697	1.03606	0.625099
F1R9P3	Uncharacterized protein (Fragment) OS=Danio rerio GN=ttc38 PE=4 SV=1 - [F1R9P3_DANRE]	51.6537	6.06201	7.88	3	4	protein binding				1.16685	1.09273	1.16842	0.936477	0.8181	1.00134	0.858634
Q1ECW0	LOC100004228 protein (Fragment) OS=Danio rerio GN=slc27a2b PE=2 SV=1 - [Q1ECW0_DANRE]	70.0899	8.22119	7.93	4	2	catalytic activity		metabolic process	Pf00501	1.27769	1.20821	1.33375	0.945621	0.869959	1.04387	0.577469
F1R2A3	Uncharacterized protein (Fragment) OS=Danio rerio GN=pfkpa PE=2 SV=1 - [F1R2A3_DANRE]	35.7813	7.02002	7.95	2	7	nucleotide binding; catalytic activity	cytoplasm; cytosol; membrane	metabolic process	Pf00365	1.38413	0.723397	1.52725	0.522638	2.57384e-05	1.10341	0.288078
E7FB67	Uncharacterized protein OS=Danio rerio GN=LOC100006895 PE=2 SV=1 - [E7FB67_DANRE]	159.192	5.59229	7.95	2	7	enzyme regulator activity	extracellular	metabolic process; regulation of biological process	Pf00207; Pf01835; Pf05326; Pf07677; Pf07678; Pf07703; Pf10569	1.07657	1.13259	1.07783	1.05204	0.625792	1.00117	0.859838
Q5U1Y4	1,5-anhydro-D-fructose reductase OS=Rattus norvegicus GN=Akr1e2 PE=2 SV=1 - [AKCL2_RAT]	34.478	7.60596	7.97	2	1	catalytic activity		metabolic process	Pf00248	0.669168	0.672566	0.642377	1.00508	0.827272	0.959964	0.857261
D3ZUX1	Protein Agphd1 OS=Rattus norvegicus GN=Agphd1 PE=4 SV=1 - [D3ZUX1_RAT]	42.4482	5.64307	7.98	3	1	catalytic activity			Pf01636	0.809452	0.43606	0.348946	0.538711	6.29106e-05	0.431089	6.24877e-11
Q68FT7	Phenylalanyl-tRNA synthetase, beta subunit OS=Rattus norvegicus GN=Farsb PE=2 SV=1 - [Q68FT7_RAT]	65.6094	7.04932	7.98	4	1	nucleotide binding; metal ion binding; RNA binding; catalytic activity	cytoplasm	metabolic process	Pf03483; Pf03484	0.868383	0.805143	0.862149	0.927175	0.765643	0.992821	0.92013
Q5TZ85	Uncharacterized protein OS=Danio rerio GN=cyp2p9 PE=4 SV=1 - [Q5TZ85_DANRE]	56.9024	8.01611	8.06	2	5	catalytic activity; metal ion binding		metabolic process	Pf00067	1.09664	1.10801	1.35269	1.01037	0.803223	1.23349	0.0377425
Q6TEN9	Copine III OS=Danio rerio GN=cpne1 PE=2 SV=1 - [Q6TEN9_DANRE]	59.1769	5.84619	8.07	3	5	protein binding			Pf00168; Pf07002	0.911304	0.871943	0.958016	0.956808	0.933464	1.05126	0.534404
Q04462	Valine--tRNA ligase OS=Rattus norvegicus GN=Vars PE=2 SV=2 - [SYVC_RAT]	140.28	7.60596	8.07	8	1	nucleotide binding; catalytic activity; protein binding	cytoplasm; mitochondrion	metabolic process; regulation of biological process	Pf00043; Pf00133; Pf08264; Pf09334	0.849679	0.766431	0.819348	0.902025	0.627207	0.964303	0.885461
E7CXR8	Epidermal growth factor receptor OS=Rattus norvegicus GN=Egfr PE=2 SV=1 - [E7CXR8_RAT]	134.839	7.03467	8.11	8	9	nucleotide binding; protein binding; catalytic activity; receptor activity; signal transducer activity; enzyme regulator activity	nucleus; cytoplasm; endosome; membrane; cell surface	cell communication; metabolic process; regulation of biological process; response to stimulus; cell organization and biogenesis; development; cell proliferation; cellular component movement; transport; reproduction; cell death; cell differentiation	Pf00069; Pf00757; Pf01030; Pf07714	1.16457	1.09264	1.19141	0.938232	0.82804	1.02305	0.708801
D4A8D5	Filamin, beta (Predicted) OS=Rattus norvegicus GN=Flnb PE=4 SV=1 - [D4A8D5_RAT]	275.144	5.73193	8.11	11	3	protein binding	cytoskeleton; cytoplasm; membrane	development	Pf00307; Pf00630	0.583219	0.689499	0.526365	1.18223	0.239539	0.902517	0.502914
F1QPC1	Uncharacterized protein OS=Danio rerio GN=cyp3c1 PE=2 SV=1 - [F1QPC1_DANRE]	57.507	8.00146	8.12	3	4	catalytic activity; metal ion binding		metabolic process	Pf00067	0.945557	1.42118	1.51339	1.50301	0.00952182	1.60053	8.56005e-06
G3V9Y0	Transmembrane protein 33 OS=Rattus norvegicus GN=Tmem33 PE=4 SV=1 - [G3V9Y0_RAT]	27.8657	9.65674	8.13	2	3		membrane; cytoplasm		Pf03661	0.633264	0.85153	0.692927	1.34467	0.052887	1.09421	0.324067
Q7SY54	Ethanolamine-phosphate phospho-lyase OS=Danio rerio GN=agxt2l1 PE=2 SV=1 - [AT2L1_DANRE]	54.7008	7.1665	8.13	4	2	catalytic activity	cytoplasm; mitochondrion	metabolic process; development	Pf00202	0.958346	1.22674	1.1668	1.28005	0.0999165	1.21751	0.0501331
Q6P3I8	Glutaryl-Coenzyme A dehydrogenase OS=Danio rerio GN=gcdh PE=2 SV=1 - [Q6P3I8_DANRE]	48.8538	8.11865	8.16	2	2	catalytic activity		metabolic process	Pf00441; Pf02770; Pf02771; Pf08028	1.00751	0.882868	0.861299	0.87629	0.49455	0.854881	0.271097
A9JRW0	Catenin (Cadherin-associated protein), alpha OS=Danio rerio GN=ctnna1 PE=2 SV=1 - [A9JRW0_DANRE]	100.469	6.20166	8.16	2	4	structural molecule activity; protein binding	cytoplasm; cytoskeleton; membrane		Pf01044	1.60376	1.67925	1.40735	1.04707	0.6457	0.877533	0.371933
F1QCW3	Uncharacterized protein (Fragment) OS=Danio rerio GN=wu:fd55e03 PE=2 SV=1 - [F1QCW3_DANRE]	37.0492	9.05615	8.16	3	2	nucleotide binding; catalytic activity		metabolic process	Pf00106; Pf08659	0.99096	1.04763	1.0167	1.05719	0.605534	1.02597	0.689514
E9PTQ6	Protein Stt3b OS=Rattus norvegicus GN=Stt3b PE=2 SV=1 - [E9PTQ6_RAT]	93.3559	9.36377	8.16	6	4	catalytic activity	cytoplasm; endoplasmic reticulum; membrane	metabolic process	Pf02516	1.31981	1.44884	1.19712	1.09777	0.460072	0.907042	0.528563
F8W3C5	Phytanoyl-CoA dioxygenase domain-containing protein 1 OS=Danio rerio GN=phyhd1 PE=2 SV=1 - [F8W3C5_DANRE]	29.0825	6.17627	8.2	2	2				Pf05721	1.1665	1.32464	0.97116	1.13557	0.347985	0.832543	0.189919
Q6NXC1	Uncharacterized protein OS=Danio rerio GN=rbm4.3 PE=2 SV=1 - [Q6NXC1_DANRE]	38.2112	9.27588	8.21	2	1	nucleotide binding; catalytic activity		metabolic process	Pf00076	1.59282	1.51839	1.57711	0.953273	0.913412	0.99014	0.939709
Q5PRA2	Probable 2-oxoglutarate dehydrogenase E1 component DHKTD1, mitochondrial OS=Danio rerio GN=dhtkd1 PE=2 SV=2 - [DHTK1_DANRE]	102.899	6.93213	8.26	6	2	catalytic activity	cytoplasm; mitochondrion	metabolic process	Pf00676; Pf02779	1.21159	1.14215	1.06648	0.942683	0.853281	0.880233	0.385142
Q4G5V8	Reticulon 4-n OS=Danio rerio GN=rtn4a PE=2 SV=1 - [Q4G5V8_DANRE]	21.6897	8.66064	8.29	2	8		cytoplasm; endoplasmic reticulum	development; cell differentiation; cell organization and biogenesis; response to stimulus	Pf02453	1.24336	1.22752	1.17743	0.987261	0.910301	0.946975	0.773309
Q6IMF3	Keratin, type II cytoskeletal 1 OS=Rattus norvegicus GN=Krt1 PE=2 SV=1 - [K2C1_RAT]	64.7911	7.86963	8.32	4	3	structural molecule activity; transporter activity	cytoskeleton; membrane	defense response; metabolic process; regulation of biological process; response to stimulus; transport	Pf00038; Pf01496	1.82358	1.77688	1.91207	0.97439	0.971903	1.04852	0.550138
Q6NWF0	Uncharacterized protein OS=Danio rerio GN=zgc:85777 PE=2 SV=1 - [Q6NWF0_DANRE]	47.7697	8.51416	8.33	3	2	catalytic activity		metabolic process	Pf00441; Pf02770; Pf02771; Pf08028	1.25065	1.2504	1.21982	0.999799	0.851561	0.975349	0.95726
A8WGN9	Lipase OS=Danio rerio GN=lipf PE=2 SV=1 - [A8WGN9_DANRE]	44.6854	6.32861	8.33	4	2	catalytic activity		response to stimulus; metabolic process	Pf00561; Pf04083; Pf12697	1.16202	1.18708	1.3173	1.02157	0.753352	1.13362	0.190709
F1LSP9	Protein Fggy OS=Rattus norvegicus GN=Fggy PE=2 SV=1 - [F1LSP9_RAT]	60.2144	6.44287	8.33	5	3	catalytic activity		metabolic process; cellular homeostasis	Pf00370; Pf02782	0.42857	0.224734	0.409511	0.524381	2.84525e-05	0.955528	0.828484
Q6AXS5	Plasminogen activator inhibitor 1 RNA-binding protein OS=Rattus norvegicus GN=Serbp1 PE=1 SV=2 - [PAIRB_RAT]	44.7273	8.54346	8.35	3	2	RNA binding	nucleus; cytoplasm; membrane	cell death; regulation of biological process	Pf04774	0.73001	0.771467	0.872537	1.05679	0.607077	1.19524	0.0733492
F1QIL6	Uncharacterized protein OS=Danio rerio GN=acad9 PE=3 SV=1 - [F1QIL6_DANRE]	69.5969	8.07471	8.41	4	4	catalytic activity	membrane	metabolic process	Pf00441; Pf02770; Pf02771; Pf08028	0.965089	1.09118	0.90777	1.13065	0.361296	0.940608	0.732632
E7F3G6	Uncharacterized protein OS=Danio rerio GN=CR854964.1 PE=4 SV=1 - [E7F3G6_DANRE]	30.0373	5.60498	8.42	2	1	protein binding			Pf01398	1.09319	1.23282	1.20485	1.12772	0.369399	1.10214	0.292848
F1QJX7	Uncharacterized protein OS=Danio rerio GN=gnas PE=4 SV=1 - [F1QJX7_DANRE]	44.4486	7.62061	8.44	2	24	nucleotide binding; signal transducer activity		cell communication; regulation of biological process; response to stimulus	Pf00025; Pf00503; Pf08477	1.08919	1.05869	1.04693	0.972	0.983461	0.961207	0.865334
F1QAC1	Uncharacterized protein (Fragment) OS=Danio rerio GN=iqgap2 PE=4 SV=1 - [F1QAC1_DANRE]	173.648	6.20166	8.45	5	3	enzyme regulator activity; protein binding; DNA binding	membrane	metabolic process; regulation of biological process; cell communication; response to stimulus	Pf00307; Pf00616; Pf03836	1.04378	0.947521	0.989759	0.907775	0.658259	0.94824	0.78144
Q1LYJ7	Uncharacterized protein OS=Danio rerio GN=kng1 PE=4 SV=1 - [Q1LYJ7_DANRE]	36.9547	6.02393	8.46	2	2	enzyme regulator activity			Pf00031	1.08276	1.11559	0.976421	1.03031	0.715456	0.901786	0.49882
A0PGL6	Cytochrome P450 CYP2X10 OS=Danio rerio GN=cyp2x10.2 PE=2 SV=1 - [A0PGL6_DANRE]	56.7762	7.23975	8.47	2	11	catalytic activity; metal ion binding		metabolic process	Pf00067	1.54636	1.55528	1.49512	1.00577	0.824109	0.966863	0.902113
A5WWM0	Uncharacterized protein OS=Danio rerio GN=vps4b PE=3 SV=1 - [A5WWM0_DANRE]	48.8682	7.10791	8.47	4	10	nucleotide binding; catalytic activity; RNA binding		metabolic process	Pf00004; Pf00910; Pf01078; Pf01695; Pf04212; Pf04389; Pf06068; Pf07724; Pf07728; Pf09336	1.84318	1.61841	1.79162	0.878057	0.503274	0.972029	0.935701
Q7ZUJ4	B-cell receptor-associated protein 31 OS=Danio rerio GN=bcap31 PE=2 SV=1 - [Q7ZUJ4_DANRE]	28.0218	8.55811	8.5	2	2		cytoplasm; endoplasmic reticulum; membrane	transport	Pf05529; Pf12004	0.81597	0.744668	0.749978	0.912617	0.684722	0.919125	0.59951
Q502P4	Zgc:152809 protein (Fragment) OS=Danio rerio GN=crp PE=2 SV=1 - [Q502P4_DANRE]	23.8899	5.13525	8.53	2	9				Pf00354	0.820122	1.28313	0.811543	1.56456	0.00466092	0.98954	0.944105
F1REH8	Annexin OS=Danio rerio GN=anxa13 PE=2 SV=1 - [F1REH8_DANRE]	35.2276	4.64014	8.54	3	3	metal ion binding			Pf00191	0.932262	0.996048	0.593103	1.06842	0.562696	0.636198	0.000567113
O97031	DjVLGA OS=Dugesia japonica GN=DjvlgA PE=2 SV=1 - [O97031_DUGJA]	81.1699	8.25049	8.54	4	2	nucleotide binding; DNA binding; catalytic activity			Pf00270; Pf00271; Pf04851	1.82011	1.80652	1.62734	0.992532	0.885439	0.894086	0.456605
I3ISH4	Uncharacterized protein OS=Danio rerio GN=lypla2 PE=4 SV=1 - [I3ISH4_DANRE]	23.8211	6.62451	8.56	2	4	catalytic activity			Pf00561; Pf01738; Pf02230; Pf03959; Pf07859; Pf12695; Pf12697	1.25369	1.45135	1.10599	1.15766	0.292696	0.882185	0.394845
Q4QRF7	UPF0762 protein C6orf58 homolog OS=Danio rerio GN=zgc:77778 PE=2 SV=1 - [CF058_DANRE]	39.4663	6.1001	8.59	4	2		extracellular	development	Pf05612	1.30313	1.28003	1.33853	0.982275	0.934029	1.02717	0.681729
Q6NSN3	Ubiquinol-cytochrome c reductase core protein I OS=Danio rerio GN=uqcrc1 PE=2 SV=1 - [Q6NSN3_DANRE]	52.0792	6.63916	8.65	3	3	catalytic activity; metal ion binding		metabolic process	Pf00675; Pf05193	1.07556	1.02703	1.04887	0.954874	0.922495	0.975178	0.956149
D5JG77	TIA1-like protein OS=Dugesia japonica GN=TIAL-3 PE=2 SV=1 - [D5JG77_DUGJA]	36.1448	6.7124	8.67	2	1	nucleotide binding			Pf00076	1.92147	1.81582	1.87668	0.945018	0.866537	0.976692	0.965969
F1RBY6	Uncharacterized protein OS=Danio rerio GN=ap1g1 PE=2 SV=1 - [F1RBY6_DANRE]	91.0361	6.771	8.67	5	5	transporter activity	cytoplasm; Golgi; membrane	transport	Pf01602; Pf02883	1.05449	1.05006	1.46199	0.995802	0.870135	1.38645	0.00167465
D4ABK8	Protein Ctnnd1 OS=Rattus norvegicus GN=Ctnnd1 PE=2 SV=1 - [D4ABK8_RAT]	92.4067	7.15186	8.67	6	4	protein binding	nucleus; cytoplasm; membrane	development	Pf00514	1.41729	1.1257	1.21183	0.79426	0.175895	0.855031	0.271702
F1QH12	Uncharacterized protein OS=Danio rerio GN=acaca PE=2 SV=1 - [F1QH12_DANRE]	265.743	6.53662	8.7	8	9	catalytic activity; nucleotide binding; metal ion binding	membrane	metabolic process	Pf00289; Pf00364; Pf01039; Pf02785; Pf02786; Pf07478; Pf08326	1.11649	1.18699	1.08055	1.06315	0.582564	0.967808	0.908262
Q6TH07	Flotillin 1 OS=Danio rerio GN=flot1b PE=2 SV=1 - [Q6TH07_DANRE]	47.1783	6.72705	8.71	3	7	protein binding	cytoplasm; membrane		Pf00769; Pf01145	1.60298	1.50116	1.47851	0.936476	0.818094	0.922348	0.618973
F1R8N2	Uncharacterized protein (Fragment) OS=Danio rerio GN=sb:cb37 PE=2 SV=1 - [F1R8N2_DANRE]	159.837	5.5415	8.72	3	5	enzyme regulator activity	extracellular; membrane	metabolic process; regulation of biological process	Pf00207; Pf01835; Pf05326; Pf07677; Pf07678; Pf07703; Pf10569; Pf11974	1.23794	1.25586	1.16653	1.01448	0.784745	0.942321	0.743535
F1RCA1	Uncharacterized protein OS=Danio rerio GN=uba1 PE=2 SV=1 - [F1RCA1_DANRE]	118.174	5.5542	8.79	2	3	nucleotide binding; catalytic activity		metabolic process	Pf00899; Pf02134; Pf09358; Pf10585	1.19671	1.24848	1.28981	1.04326	0.661217	1.0778	0.396198
Q08CQ0	Zgc:152830 OS=Danio rerio GN=alas2 PE=2 SV=1 - [Q08CQ0_DANRE]	55.4864	7.76709	8.79	4	4	catalytic activity; metal ion binding	cytoplasm	metabolic process	Pf00883	1.34759	1.38001	1.59125	1.02406	0.742472	1.18081	0.0929556
D2Z0E0	DjPiwiC OS=Dugesia japonica GN=DjpiwiC PE=2 SV=1 - [D2Z0E0_DUGJA]	109.117	8.99756	8.8	6	2	protein binding			Pf02170; Pf02171	2.03832	1.92581	2.15413	0.944804	0.865319	1.05682	0.503282
A4IGB9	Microsomal triglyceride transfer protein OS=Danio rerio GN=mtp PE=2 SV=1 - [A4IGB9_DANRE]	96.9681	8.26514	8.82	6	5	transporter activity		transport; metabolic process	Pf01347	0.996357	0.974429	1.08531	0.977993	0.954547	1.08928	0.344677
F1RE15	Uncharacterized protein OS=Danio rerio GN=mogat3a PE=4 SV=1 - [F1RE15_DANRE]	26.4796	9.5835	8.9	2	2	catalytic activity	membrane		Pf03982	1.48042	1.34289	1.50825	0.907098	0.654585	1.01879	0.737226
Q5SGE0	Leucine-rich PPR motif-containing protein, mitochondrial OS=Rattus norvegicus GN=Lrpprc PE=1 SV=1 - [LPPRC_RAT]	156.554	6.60986	8.91	12	8	DNA binding; RNA binding; protein binding	chromosome; nucleus; organelle lumen; membrane; cytoplasm; mitochondrion; cytoskeleton	metabolic process; regulation of biological process; transport		1.09972	1.36056	0.958203	1.23719	0.148661	0.871318	0.342469
Q5BJX2	Pdhx protein (Fragment) OS=Rattus norvegicus GN=Pdhx PE=2 SV=1 - [Q5BJX2_RAT]	40.8647	8.68994	8.95	3	3	catalytic activity	cytoplasm; mitochondrion	metabolic process	Pf00198; Pf02817	0.954097	1.02675	0.779023	1.07614	0.534373	0.816503	0.142838
F1RBN6	Uncharacterized protein OS=Danio rerio GN=ethe1 PE=4 SV=1 - [F1RBN6_DANRE]	30.6868	7.76709	8.96	2	2	catalytic activity			Pf00753	1.07373	1.2108	1.03619	1.12765	0.369588	0.965031	0.8902
Q6S3A0	Plectin OS=Rattus norvegicus GN=Plec PE=2 SV=1 - [Q6S3A0_RAT]	533.498	5.90967	8.96	31	21	protein binding; structural molecule activity	cytoplasm; cytoskeleton; membrane	reproduction; response to stimulus; cell differentiation; cell organization and biogenesis	Pf00307; Pf00681; Pf03501; Pf07812; Pf11971	0.382708	0.601129	0.652785	1.57073	0.00433378	1.7057	4.89374e-07
Q5PR98	Protein NDRG2 OS=Danio rerio GN=ndrg2 PE=2 SV=1 - [NDRG2_DANRE]	40.442	5.65576	8.97	3	1		cytoplasm	development; cell communication; regulation of biological process; response to stimulus; cell differentiation	Pf03096; Pf12697	1.34673	1.28774	1.33988	0.956197	0.929997	0.994914	0.904918
Q7ZWJ6	Zgc:56466 OS=Danio rerio GN=nipsnap3 PE=2 SV=1 - [Q7ZWJ6_DANRE]	28.8327	9.40771	9.02	2	2				Pf07978	1.36811	1.27879	1.44614	0.934713	0.80812	1.05704	0.502064
Q3MU74	Complement component C3-1 OS=Danio rerio GN=c3b PE=2 SV=1 - [Q3MU74_DANRE]	184.64	6.72705	9.02	11	8	enzyme regulator activity; protein binding	extracellular	metabolic process; regulation of biological process; response to stimulus	Pf00207; Pf01759; Pf01821; Pf01835; Pf07677; Pf07678; Pf07703; Pf10569; Pf11974	1.02755	1.0788	1.14916	1.04988	0.634408	1.11835	0.23605
A8WGT4	Putative uncharacterized protein (Fragment) OS=Danio rerio PE=2 SV=1 - [A8WGT4_DANRE]	23.4715	5.14795	9.05	2	2	metal ion binding	extracellular		Pf00811	1.15569	1.07015	1.2649	0.925976	0.758913	1.09449	0.322932
B6RK61	Myosin heavy chain 7B OS=Rattus norvegicus GN=Myh7b PE=2 SV=1 - [B6RK61_RAT]	221.494	5.90967	9.07	3	1	nucleotide binding; catalytic activity; motor activity; protein binding	membrane; cytoskeleton		Pf00063; Pf01576; Pf02736; Pf04156; Pf12128	0.654636	0.949292	0.843891	1.45011	0.0172516	1.2891	0.0131625
F1QQC5	Uncharacterized protein OS=Danio rerio GN=slc27a2a PE=2 SV=1 - [F1QQC5_DANRE]	68.9084	7.98682	9.12	5	3	catalytic activity	membrane	metabolic process	Pf00501	1.01263	1.15509	0.995214	1.14068	0.334549	0.982798	0.99375
P48675	Desmin OS=Rattus norvegicus GN=Des PE=1 SV=2 - [DESM_RAT]	53.424	5.2749	9.17	2	27	structural molecule activity; protein binding	cytoplasm; cytoskeleton; membrane		Pf00038; Pf03962; Pf04732	0.764743	1.05837	0.830852	1.38395	0.035225	1.08645	0.356926
A4V6M2	HnRNP K protein OS=Dugesia japonica PE=2 SV=1 - [A4V6M2_DUGJA]	37.5377	7.88428	9.2	2	1	RNA binding			Pf00013	1.11747	1.11464	0.871063	0.997471	0.862362	0.779496	0.0667041
F1M7P5	Protein LOC100359558 OS=Rattus norvegicus GN=Fam177a1 PE=2 SV=1 - [F1M7P5_RAT]	55.3464	8.1333	9.2	4	3	nucleotide binding; catalytic activity; RNA binding	cytoplasm	metabolic process; transport	Pf00448; Pf02881; Pf02978; Pf03205; Pf09974	1.31813	1.13627	1.27245	0.862032	0.426621	0.965346	0.892249
E7FCY5	Uncharacterized protein OS=Danio rerio GN=acsbg1 PE=4 SV=1 - [E7FCY5_DANRE]	75.0071	6.06201	9.2	5	1	catalytic activity		metabolic process	Pf00501	1.11416	1.12639	1.19781	1.01098	0.800468	1.07508	0.409115
Q4R1A4	Protein Tfg OS=Rattus norvegicus GN=Tfg PE=2 SV=1 - [Q4R1A4_RAT]	31.0063	4.95752	9.22	2	3	signal transducer activity; protein binding		cell communication; regulation of biological process; response to stimulus	Pf00564; Pf08232	0.845532	0.883584	0.834846	1.045	0.654102	0.987363	0.960088
B2RYG6	Ubiquitin thioesterase OTUB1 OS=Rattus norvegicus GN=Otub1 PE=1 SV=1 - [OTUB1_RAT]	31.2504	4.94482	9.23	2	1	catalytic activity; protein binding	cytoplasm	metabolic process; response to stimulus; cell organization and biogenesis; regulation of biological process	Pf02338; Pf10275	0.665452	0.683159	0.746527	1.02661	0.731395	1.12183	0.225036
Q6DHQ3	Aspartoacylase-2B OS=Danio rerio GN=acy3.2 PE=2 SV=1 - [ACY3B_DANRE]	35.2308	6.37939	9.24	2	4	metal ion binding; catalytic activity	cytoplasm; membrane	metabolic process	Pf04952	1.58052	1.66837	1.45561	1.05558	0.611802	0.920966	0.6106
D4AD15	Protein Eif4g1 OS=Rattus norvegicus GN=LOC680559 PE=2 SV=1 - [D4AD15_RAT]	174.851	5.36377	9.24	10	12	DNA binding; RNA binding; enzyme regulator activity; protein binding	cytoplasm	metabolic process; regulation of biological process; development; response to stimulus	Pf00566; Pf02020; Pf02847; Pf02854	0.672756	0.677777	0.590702	1.00746	0.816394	0.878034	0.374366
O35760	Isopentenyl-diphosphate Delta-isomerase 1 OS=Rattus norvegicus GN=Idi1 PE=2 SV=2 - [IDI1_RAT]	26.3793	5.8335	9.25	2	1	metal ion binding; catalytic activity	cytoplasm; mitochondrion	metabolic process; response to stimulus	Pf00293	0.425473	0.295742	0.474945	0.695089	0.0236225	1.11627	0.242815
D3Z9J3	Protein Atp11c-ps1 OS=Rattus norvegicus GN=Atp11c-ps1 PE=4 SV=1 - [D3Z9J3_RAT]	127.944	6.88818	9.4	9	16	nucleotide binding; metal ion binding; catalytic activity; transporter activity	membrane	transport; metabolic process	Pf00122; Pf00702	0.687945	0.568795	0.64036	0.826803	0.28032	0.930831	0.671127
B0UYL0	Uncharacterized protein OS=Danio rerio GN=ndufa10 PE=4 SV=1 - [B0UYL0_DANRE]	38.5108	7.50342	9.41	2	4	nucleotide binding; catalytic activity		metabolic process	Pf01712	0.638737	0.683481	1.22491	1.07005	0.556639	1.91771	1.07575e-09
Q6AXI9	Zgc:101129 OS=Danio rerio GN=zgc:101129 PE=2 SV=1 - [Q6AXI9_DANRE]	31.6902	6.23975	9.44	2	1	catalytic activity		metabolic process	Pf02567	0.696118	0.646725	0.697075	0.929044	0.776149	1.00137	0.858392
A4V6K9	DEAD box polypeptide protein (Fragment) OS=Dugesia japonica PE=2 SV=1 - [A4V6K9_DUGJA]	40.634	4.83057	9.44	2	1	protein binding			Pf00622	1.91105	1.62181	2.06622	0.848651	0.367219	1.0812	0.380417
Q6IQU1	Zgc:86611 OS=Danio rerio GN=akr1b1 PE=2 SV=1 - [Q6IQU1_DANRE]	35.461	6.46826	9.52	3	7	catalytic activity		metabolic process	Pf00248	1.41371	1.27339	1.31856	0.90074	0.620329	0.932694	0.682744
Q63555	SP120 OS=Rattus norvegicus GN=Hnrnpu PE=2 SV=1 - [Q63555_RAT]	87.6936	6.23975	9.52	6	2	transporter activity; protein binding	cytoplasm; nucleus; spliceosomal complex	transport; metabolic process; regulation of biological process	Pf00622	0.718868	0.72342	0.675495	1.00633	0.821549	0.939664	0.726642
P97633	Casein kinase I isoform alpha OS=Rattus norvegicus GN=Csnk1a1 PE=2 SV=1 - [KC1A_RAT]	37.4712	9.5249	9.54	3	7	nucleotide binding; metal ion binding; protein binding; catalytic activity	chromosome; nucleus; cytoplasm; cytoskeleton; organelle lumen	cell organization and biogenesis; metabolic process; cell communication; regulation of biological process; response to stimulus; cell division	Pf00069; Pf07714	1.98363	1.80169	1.93193	0.908275	0.660983	0.973936	0.948088
F1Q7H1	Uncharacterized protein OS=Danio rerio GN=cyp27a7 PE=2 SV=2 - [F1Q7H1_DANRE]	59.8481	8.90967	9.54	4	10	catalytic activity; metal ion binding		metabolic process	Pf00067	0.985943	0.910072	1.27487	0.923047	0.742523	1.29304	0.0121703
Q6NYV3	Uncharacterized protein OS=Danio rerio GN=h1f0 PE=2 SV=1 - [Q6NYV3_DANRE]	21.1935	10.8579	9.55	2	3	DNA binding	chromosome; nucleus	cell organization and biogenesis; metabolic process	Pf00538	5.6083	1.37233	1.56298	0.244696	6.32439e-21	0.278691	1.49634e-23
Q66H15	Regulator of microtubule dynamics protein 3 OS=Rattus norvegicus GN=Rmdn3 PE=2 SV=1 - [RMD3_RAT]	52.28	5.021	9.55	4	1	protein binding	cytoskeleton; nucleus; cytoplasm; mitochondrion; membrane	cellular homeostasis; cell death; cell differentiation		0.96982	1.64	1.36535	1.69104	0.00100795	1.40784	0.00103064
D4A7N1	Coiled-coil-helix-coiled-coil-helix domain-containing protein 6, mitochondrial OS=Rattus norvegicus GN=Chchd6 PE=2 SV=1 - [CHCH6_RAT]	29.1928	7.94287	9.58	2	2		cytoplasm; mitochondrion; membrane	response to stimulus; cell organization and biogenesis	Pf05300; Pf06747	0.222756	0.326432	0.198356	1.46542	0.0145535	0.890462	0.437333
A8E7G0	Uncharacterized protein OS=Danio rerio GN=dhdhl PE=4 SV=1 - [A8E7G0_DANRE]	36.7547	6.7124	9.58	2	2	nucleotide binding; catalytic activity		metabolic process	Pf01408; Pf02894; Pf03807	1.32481	1.47772	1.32614	1.11542	0.404918	1.001	0.861047
D3ZRA3	Acetyl-CoA carboxylase 1 OS=Rattus norvegicus GN=Acaca PE=2 SV=1 - [D3ZRA3_RAT]	264.213	6.3667	9.58	10	10	catalytic activity; nucleotide binding; metal ion binding	membrane	metabolic process	Pf00289; Pf00364; Pf01039; Pf02222; Pf02655; Pf02785; Pf02786; Pf07478; Pf08326	0.650142	0.482419	0.564425	0.742022	0.0691335	0.868156	0.32799
Q498C8	Protein RER1 OS=Rattus norvegicus GN=Rer1 PE=2 SV=1 - [RER1_RAT]	22.9729	9.51025	9.69	2	3		cytoplasm; Golgi; membrane	transport	Pf03248	0.99059	1.03915	0.967569	1.04902	0.637854	0.976761	0.966411
Q9JLA3	UDP-glucose:glycoprotein glucosyltransferase 1 OS=Rattus norvegicus GN=Uggt1 PE=1 SV=2 - [UGGG1_RAT]	176.32	5.65576	9.74	10	2	catalytic activity; protein binding	cytoplasm; endoplasmic reticulum; organelle lumen	metabolic process	Pf06427	0.325307	0.360559	0.433777	1.10837	0.426356	1.33344	0.00531294
B0UYB4	Uncharacterized protein OS=Danio rerio GN=si:dkey-91i10.3 PE=4 SV=1 - [B0UYB4_DANRE]	58.7214	8.1333	9.75	4	1	catalytic activity; metal ion binding		metabolic process	Pf00067	0.872176	0.93549	0.819543	1.07259	0.547277	0.939654	0.726576
Q5SPG8	Uncharacterized protein OS=Danio rerio GN=si:dkey-11e23.4 PE=4 SV=1 - [Q5SPG8_DANRE]	48.571	8.29443	9.79	3	3	catalytic activity		metabolic process	Pf01738; Pf04775; Pf08840	0.809371	1.18913	0.838516	1.46921	0.0139514	1.03601	0.625416
B8JN00	Uncharacterized protein OS=Danio rerio GN=h2afy2 PE=4 SV=1 - [B8JN00_DANRE]	24.3224	10.1694	9.82	2	3	DNA binding; protein binding	chromosome; nucleus; membrane	cell organization and biogenesis; metabolic process	Pf00125	2.24002	1.39883	1.26226	0.624473	0.00275378	0.563504	1.0315e-05
Q6NYE3	Phosphoglucomutase 2 OS=Danio rerio GN=pgm2 PE=2 SV=1 - [Q6NYE3_DANRE]	67.4304	6.17627	9.82	4	2	metal ion binding; catalytic activity	cytoplasm; cytosol	metabolic process	Pf00408; Pf02878; Pf02879; Pf02880	0.872718	0.937902	0.875186	1.07469	0.539633	1.00283	0.848036
A4V6J8	Tudor protein (Fragment) OS=Dugesia japonica PE=2 SV=1 - [A4V6J8_DUGJA]	34.7186	5.46533	9.84	2	1				Pf00567	1.67715	1.40744	1.86593	0.839185	0.327973	1.11256	0.255285
E7EZD3	Uncharacterized protein OS=Danio rerio GN=abcb11b PE=3 SV=1 - [E7EZD3_DANRE]	149.305	7.10791	9.84	6	4	nucleotide binding; catalytic activity; transporter activity	membrane	metabolic process; transport	Pf00005; Pf00664	0.977995	1.01363	1.04266	1.03643	0.689539	1.06612	0.453766
F1QXK3	Acyl-coenzyme A oxidase OS=Danio rerio GN=acox3 PE=3 SV=1 - [F1QXK3_DANRE]	70.0992	7.62061	9.85	4	2	catalytic activity	cytoplasm; membrane	metabolic process	Pf00441; Pf01756; Pf02770	1.03701	1.46348	1.18474	1.41125	0.026349	1.14246	0.167824
Q9U8R6	Djsyt protein OS=Dugesia japonica GN=Djsyt PE=2 SV=1 - [Q9U8R6_DUGJA]	44.9845	8.90967	9.87	3	1	transporter activity; protein binding	cytoplasm; membrane	transport	Pf00168	2.00052	2.00704	1.97868	1.00326	0.835611	0.989083	0.947455
I3ISA3	Uncharacterized protein OS=Danio rerio GN=myh10 PE=4 SV=1 - [I3ISA3_DANRE]	230.312	5.5415	9.87	3	6	nucleotide binding; catalytic activity; motor activity; protein binding	membrane; cytoskeleton		Pf00063; Pf01496; Pf01576; Pf05667; Pf05911; Pf07888; Pf09726; Pf09731; Pf11559; Pf12128	1.43935	1.36582	1.49526	0.948913	0.888653	1.03885	0.607887
G3V878	Sec11-like 3 (S. cerevisiae), isoform CRA_c OS=Rattus norvegicus GN=Sec11c PE=4 SV=1 - [G3V878_RAT]	21.6465	9.23193	9.9	2	2	catalytic activity	cytoplasm; endoplasmic reticulum; membrane	metabolic process	Pf00717	1.9846	2.04343	2.53711	1.02964	0.718326	1.2784	0.0162419
D3ZAP9	Protein Gpd1l OS=Rattus norvegicus GN=Gpd1l PE=3 SV=1 - [D3ZAP9_RAT]	38.0419	7.00537	9.97	2	4	nucleotide binding; catalytic activity; protein binding	cytoplasm	metabolic process	Pf01210; Pf07479	0.728142	0.91703	0.590581	1.25941	0.121305	0.81108	0.128957
E7FGT2	Uncharacterized protein OS=Danio rerio GN=h6pd PE=4 SV=1 - [E7FGT2_DANRE]	89.4553	7.34229	9.99	5	1	nucleotide binding; catalytic activity		metabolic process	Pf00479; Pf01182; Pf02781	1.19321	1.14975	0.932973	0.963576	0.971755	0.7819	0.0704188
Q9MIY7	Cytochrome c oxidase subunit 2 OS=Danio rerio GN=mt-co2 PE=3 SV=1 - [COX2_DANRE]	25.9682	4.71631	10	2	1	catalytic activity; transporter activity; metal ion binding	cytoplasm; mitochondrion; membrane	transport; metabolic process	Pf00116; Pf02790	0.817014	0.953924	1.14772	1.16757	0.270234	1.40477	0.00110561
F1QUW4	Hypoxia up-regulated protein 1 OS=Danio rerio GN=hyou1 PE=2 SV=1 - [F1QUW4_DANRE]	110.256	5.03369	10	5	2	nucleotide binding			Pf00012	1.01484	0.967888	1.19308	0.953731	0.91601	1.17563	0.101018
F1QLV0	Uncharacterized protein OS=Danio rerio GN=zgc:92161 PE=3 SV=1 - [F1QLV0_DANRE]	27.5022	7.26904	10.08	2	6	nucleotide binding; catalytic activity		metabolic process	Pf00106	1.36027	1.51399	1.3796	1.113	0.412184	1.01421	0.768435
Q7ZUX4	Retinol dehydrogenase 1 OS=Danio rerio GN=rdh1 PE=2 SV=1 - [Q7ZUX4_DANRE]	36.2719	8.90967	10.09	3	3	nucleotide binding; catalytic activity		development; metabolic process; cell differentiation	Pf00106; Pf08643; Pf08659	1.40812	1.84081	1.3731	1.30728	0.0768186	0.97513	0.955837
Q6IQH4	Uncharacterized protein OS=Danio rerio GN=psmd8 PE=2 SV=1 - [Q6IQH4_DANRE]	30.9951	6.93213	10.11	2	2		proteasome	metabolic process	Pf03399; Pf10075	1.43407	1.19177	1.40277	0.831039	0.296143	0.978171	0.975548
Q99PF5	Far upstream element-binding protein 2 OS=Rattus norvegicus GN=Khsrp PE=1 SV=1 - [FUBP2_RAT]	74.1805	6.85889	10.12	5	4	DNA binding; RNA binding; protein binding	nucleus; organelle lumen; cytoplasm	metabolic process; regulation of biological process; transport	Pf00013	0.986091	1.22729	0.900242	1.2446	0.139002	0.91294	0.562775
Q4G061	Eukaryotic translation initiation factor 3 subunit B OS=Rattus norvegicus GN=Eif3b PE=1 SV=1 - [EIF3B_RAT]	90.854	5.08447	10.16	7	5	nucleotide binding; RNA binding; protein binding	cytoplasm	metabolic process; regulation of biological process	Pf00076; Pf08662	0.884659	0.892382	0.921652	1.00873	0.810641	1.04182	0.589818
F1LXC9	Protein LOC686567 (Fragment) OS=Rattus norvegicus GN=LOC686567 PE=2 SV=1 - [F1LXC9_RAT]	103.677	6.0874	10.18	2	1		cytoskeleton		Pf00681	0.968698	0.650374	0.816732	0.671391	0.0124254	0.843124	0.226081
P20650	Protein phosphatase 1A OS=Rattus norvegicus GN=Ppm1a PE=1 SV=1 - [PPM1A_RAT]	42.3897	5.36377	10.21	3	17	metal ion binding; catalytic activity; signal transducer activity; protein binding	nucleus; membrane	metabolic process; cell communication; regulation of biological process; response to stimulus; cell organization and biogenesis	Pf00481; Pf07830	2.04368	2.35832	2.03433	1.15396	0.301466	0.995421	0.901242
F1QZA4	Uncharacterized protein OS=Danio rerio GN=idh3g PE=2 SV=1 - [F1QZA4_DANRE]	42.745	8.89502	10.23	2	2	metal ion binding; catalytic activity; nucleotide binding		metabolic process	Pf00180	1.44297	1.38244	1.36785	0.958051	0.940504	0.947941	0.779515
F1QK93	Uncharacterized protein OS=Danio rerio GN=psmd1 PE=2 SV=1 - [F1QK93_DANRE]	99.4474	9.0415	10.26	3	3	enzyme regulator activity	proteasome; membrane	metabolic process; regulation of biological process	Pf01851	1.17953	2.35351	1.22642	1.99529	2.00286e-05	1.03975	0.602358
Q5PNP7	ATPase, Na+\/K+ transporting, beta 1a polypeptide OS=Danio rerio GN=atp1b1a PE=2 SV=1 - [Q5PNP7_DANRE]	29.0804	7.21045	10.28	2	4	catalytic activity; transporter activity	membrane	metabolic process; transport	Pf00287	1.242	1.20059	1.22738	0.966661	0.989144	0.988232	0.953697
E7FAQ8	Uncharacterized protein OS=Danio rerio GN=zgc:66127 PE=4 SV=1 - [E7FAQ8_DANRE]	38.5075	8.52881	10.31	2	3	nucleotide binding			Pf00076	1.5465	1.60236	1.16979	1.03612	0.690864	0.756414	0.0382306
A2CF48	Uncharacterized protein OS=Danio rerio GN=crata PE=4 SV=1 - [A2CF48_DANRE]	69.8735	8.5874	10.36	5	3	catalytic activity			Pf00755	1.54631	1.39263	1.0992	0.900617	0.619672	0.710852	0.0102957
F1R9N9	Uncharacterized protein (Fragment) OS=Danio rerio GN=gcdhl PE=3 SV=2 - [F1R9N9_DANRE]	43.8682	7.04932	10.38	2	2	catalytic activity		metabolic process	Pf00441; Pf02770; Pf02771; Pf08028	1.17885	1.20009	1.19433	1.01802	0.768997	1.01313	0.775828
F1QFV2	Uncharacterized protein OS=Danio rerio GN=hnrnpa1 PE=2 SV=1 - [F1QFV2_DANRE]	40.5044	8.63135	10.42	2	5	nucleotide binding			Pf00076	1.17235	1.07781	1.1856	0.919365	0.722006	1.0113	0.788476
Q503E6	Ezrin like OS=Danio rerio GN=ezra PE=2 SV=1 - [Q503E6_DANRE]	70.0537	5.52881	10.42	2	3	protein binding	cytoplasm; cytoskeleton; membrane		Pf00373; Pf00769; Pf09379; Pf09380	1.07506	1.16858	1.00117	1.08699	0.496172	0.931272	0.673874
A2BFV8	Uncharacterized protein OS=Danio rerio GN=anxa1a PE=4 SV=1 - [A2BFV8_DANRE]	25.3681	5.56689	10.43	2	3	enzyme regulator activity; metal ion binding		development; response to stimulus	Pf00191	1.31213	1.19694	1.31731	0.912214	0.682509	1.00395	0.840078
Q6AXV4	Sorting and assembly machinery component 50 homolog OS=Rattus norvegicus GN=Samm50 PE=1 SV=1 - [SAM50_RAT]	51.9274	6.80029	10.45	4	1		cytoplasm; membrane; mitochondrion	cell organization and biogenesis; transport	Pf01103; Pf07244	0.88303	0.824605	0.790338	0.933836	0.803167	0.895029	0.461683
F1QNK8	Hydroxypyruvate isomerase OS=Danio rerio GN=hyi PE=2 SV=1 - [F1QNK8_DANRE]	31.0446	5.64307	10.51	3	2				Pf01261	1.27726	1.09162	1.02393	0.854656	0.393325	0.801664	0.107188
Q66I16	Uncharacterized protein OS=Danio rerio GN=etfdh PE=2 SV=1 - [Q66I16_DANRE]	68.8867	7.1958	10.53	2	1	catalytic activity		metabolic process	Pf00890; Pf01266; Pf01494; Pf01946; Pf03486; Pf04820; Pf05187; Pf05834; Pf07992; Pf12831	1.05153	1.07954	1.02603	1.02664	0.731271	0.975749	0.959854
G9BRW2	Glutathione S-transferase OS=Dugesia japonica GN=GST PE=2 SV=1 - [G9BRW2_DUGJA]	25.6428	5.68115	10.55	2	1	catalytic activity; protein binding		metabolic process	Pf00043; Pf02798	1.66646	1.53577	1.72656	0.921576	0.734312	1.03606	0.625105
F1R264	Uncharacterized protein OS=Danio rerio GN=ephx2 PE=4 SV=1 - [F1R264_DANRE]	61.8636	6.20166	10.59	5	2	catalytic activity		metabolic process	Pf00561; Pf00702; Pf01738; Pf12146; Pf12695; Pf12697	1.04328	1.28427	1.06723	1.23099	0.157173	1.02296	0.70939
F1RBU6	Uncharacterized protein OS=Danio rerio GN=pdcd8 PE=2 SV=1 - [F1RBU6_DANRE]	66.9347	8.30908	10.6	3	5	catalytic activity	cytoplasm	cellular homeostasis; regulation of biological process; metabolic process	Pf00070; Pf07992	0.896829	0.889561	1.05192	0.991896	0.888428	1.17294	0.105437
Q5RGA7	Uncharacterized protein OS=Danio rerio GN=bpnt1 PE=4 SV=1 - [Q5RGA7_DANRE]	33.0812	6.11279	10.68	2	2			metabolic process	Pf00459	1.10198	1.14286	1.1743	1.0371	0.686765	1.06563	0.456268
F1Q9K6	Sulfurtransferase OS=Danio rerio GN=zgc:162544 PE=2 SV=1 - [F1Q9K6_DANRE]	33.2684	6.7417	10.7	2	6	catalytic activity			Pf00581	1.34615	1.52863	1.38764	1.13556	0.348	1.03083	0.658133
Q66HW9	Chymotrypsin-like OS=Danio rerio GN=ctrl PE=2 SV=1 - [Q66HW9_DANRE]	27.8688	8.41162	10.73	2	1	catalytic activity		metabolic process	Pf00089; Pf09342	1.53979	1.69478	1.31806	1.10065	0.450707	0.855999	0.275638
Q2TA68	Dynamin-like 120 kDa protein, mitochondrial OS=Rattus norvegicus GN=Opa1 PE=1 SV=1 - [OPA1_RAT]	111.238	7.53271	10.73	5	4	nucleotide binding; catalytic activity	cytoplasm; mitochondrion; membrane	development; metabolic process; cell death; cell organization and biogenesis; response to stimulus; cell communication; regulation of biological process	Pf00350; Pf01926	0.825826	0.80538	0.863112	0.975242	0.967793	1.04515	0.569895
F1RDX1	Uncharacterized protein OS=Danio rerio GN=auh PE=2 SV=1 - [F1RDX1_DANRE]	34.7173	8.5874	10.77	2	2	catalytic activity		metabolic process	Pf00378	0.958599	1.28908	1.22612	1.34476	0.0528377	1.27908	0.0160295
Q7ZTH9	Isovaleryl Coenzyme A dehydrogenase OS=Danio rerio GN=ivd PE=2 SV=1 - [Q7ZTH9_DANRE]	45.7551	7.82568	10.77	3	3	catalytic activity		metabolic process	Pf00441; Pf02770; Pf02771; Pf08028	1.14854	1.06742	1.17588	0.929371	0.777984	1.02381	0.703773
Q6PCT9	Proteasome (Prosome, macropain) 26S subunit, non-ATPase, 6 OS=Rattus norvegicus GN=Psmd6 PE=2 SV=1 - [Q6PCT9_RAT]	45.5692	5.51611	10.8	4	3	protein binding	proteasome		Pf01399; Pf10602	1.33602	0.863277	1.16991	0.646154	0.00575959	0.875664	0.362932
Q7SXN2	Heterogeneous nuclear ribonucleoprotein D-like OS=Danio rerio GN=hnrpdl PE=2 SV=1 - [Q7SXN2_DANRE]	33.2329	5.8208	10.81	2	1	nucleotide binding			Pf00076	1.54513	1.44468	1.31582	0.934988	0.809677	0.851587	0.257971
Q6NVC6	Nsfl1c protein (Fragment) OS=Danio rerio GN=nsfl1c PE=2 SV=1 - [Q6NVC6_DANRE]	40.4073	5.05908	10.84	2	3	protein binding			Pf00789; Pf08059	1.20678	1.78275	1.16227	1.47728	0.0127443	0.963114	0.877731
A7MBU4	Zgc:171674 protein OS=Danio rerio GN=zgc:171674 PE=2 SV=1 - [A7MBU4_DANRE]	34.1095	8.00146	10.85	3	2	protein binding				0.972165	1.21488	0.853794	1.24966	0.132723	0.87824	0.375369
Q2L6M6	Innexin9 OS=Dugesia japonica GN=inx9 PE=2 SV=1 - [Q2L6M6_DUGJA]	51.154	8.73389	10.93	5	2				Pf00876	1.49864	1.54915	1.56545	1.0337	0.701042	1.04458	0.573292
Q6P5J0	Amylase, alpha 2A; pancreatic OS=Danio rerio GN=amy2a PE=2 SV=1 - [Q6P5J0_DANRE]	56.9117	6.88818	10.94	4	10	catalytic activity		metabolic process	Pf00128; Pf02806	0.649593	1.06024	1.20911	1.63216	0.00207572	1.86134	5.68006e-09
F1LPY7	Trans-2-enoyl-CoA reductase, mitochondrial OS=Rattus norvegicus GN=Mecr PE=2 SV=1 - [F1LPY7_RAT]	40.3092	8.77783	10.99	3	3	nucleotide binding; metal ion binding; catalytic activity	cytoplasm; mitochondrion	metabolic process	Pf00107; Pf08240	0.590684	0.615412	0.551562	1.04186	0.666968	0.933768	0.689461
P10785	Hemoglobin subunit beta-1 OS=Triturus cristatus GN=HBB1 PE=1 SV=1 - [HBB1_TRICR]	15.9931	7.35693	11.03	3	3	transporter activity; metal ion binding	cytoplasm; cytosol	transport	Pf00042	0.239747	0.474776	0.560017	1.98032	2.44148e-05	2.33587	2.91e-15
E7FAV6	Uncharacterized protein OS=Danio rerio GN=LOC564077 PE=4 SV=1 - [E7FAV6_DANRE]	56.545	7.76709	11.05	4	1	receptor activity	cytoplasm; vacuole; membrane		Pf01130	0.967684	0.825669	1.11464	0.853243	0.387098	1.15187	0.145967
B8JHR9	Uncharacterized protein OS=Danio rerio GN=kpnb3 PE=2 SV=1 - [B8JHR9_DANRE]	121.04	4.91943	11.05	8	3	protein binding			Pf02985; Pf12755	0.944781	1.03913	1.01148	1.09986	0.453266	1.0706	0.43106
G3V834	Protein PRRC1 OS=Rattus norvegicus GN=Prrc1 PE=4 SV=1 - [G3V834_RAT]	46.2496	6.07471	11.06	3	2	protein binding	cytoplasm; Golgi		Pf01931	1.06521	0.712	1.04122	0.668414	0.0114018	0.977482	0.971083
E7EZK9	Uncharacterized protein OS=Danio rerio GN=fasn PE=4 SV=1 - [E7EZK9_DANRE]	274.312	6.41748	11.14	20	5	nucleotide binding; catalytic activity; protein binding; metal ion binding	membrane	metabolic process	Pf00106; Pf00107; Pf00108; Pf00109; Pf00698; Pf00975; Pf02801; Pf08659	1.0808	1.15688	1.00422	1.07039	0.55538	0.929146	0.660669
E9QF07	Uncharacterized protein OS=Danio rerio GN=myh7bb PE=4 SV=1 - [E9QF07_DANRE]	226.519	6.07471	11.15	3	3	nucleotide binding; catalytic activity; motor activity; protein binding; transporter activity	chromosome; nucleus; organelle lumen; extracellular; cytoplasm; Golgi; membrane; cytoskeleton	cell organization and biogenesis; transport; reproduction; regulation of biological process; cellular component movement; development	Pf00038; Pf00063; Pf00261; Pf01496; Pf01576; Pf02463; Pf02601; Pf02736; Pf04156; Pf05483; Pf05557; Pf05622; Pf05701; Pf06008; Pf07888; Pf08317; Pf09726; Pf09730; Pf10174; Pf12128	0.539002	0.752329	0.792621	1.39578	0.0310847	1.47053	0.000234188
Q6NZW7	Dlst protein OS=Danio rerio GN=dlst PE=2 SV=1 - [Q6NZW7_DANRE]	48.6092	8.67529	11.16	2	3	catalytic activity		metabolic process	Pf00198; Pf00364	1.17371	1.75453	1.15455	1.49485	0.0104479	0.98367	0.987307
Q7ZZV6	Band 3 anion exchange protein OS=Danio rerio GN=slc4a1a PE=2 SV=1 - [Q7ZZV6_DANRE]	101.162	6.58057	11.17	8	7	transporter activity; protein binding	membrane	transport; cell differentiation; development	Pf00955; Pf07565	1.02956	1.08607	0.99158	1.05488	0.614544	0.963109	0.877699
I3ISA6	Uncharacterized protein OS=Danio rerio GN=eppk1 PE=4 SV=1 - [I3ISA6_DANRE]	611.34	7.45947	11.21	8	1		cytoskeleton; membrane		Pf00681	0.882507	0.862696	0.938013	0.977552	0.956664	1.0629	0.470542
I1ZIA6	Calreticulin-1 OS=Schmidtea mediterranea PE=2 SV=1 - [I1ZIA6_SCHMD]	47.5413	4.88135	11.25	6	1	metal ion binding; protein binding	cytoplasm; endoplasmic reticulum	metabolic process	Pf00262	2.10028	1.82517	2.27851	0.869013	0.459316	1.08486	0.363908
I1ZI80	Heterochromatin protein 1-1 (Fragment) OS=Schmidtea mediterranea PE=2 SV=1 - [I1ZI80_SCHMD]	26.9316	6.63916	11.3	2	1		nucleus		Pf00385; Pf01393	2.80272	2.85071	2.39704	1.01712	0.772966	0.855255	0.272609
O89000	Dihydropyrimidine dehydrogenase [NADP(+)] OS=Rattus norvegicus GN=Dpyd PE=2 SV=1 - [DPYD_RAT]	111.395	6.771	11.32	7	4	nucleotide binding; catalytic activity; protein binding; metal ion binding	cytoplasm; cytosol	metabolic process; response to stimulus	Pf01180; Pf01207; Pf07992; Pf12838	0.971171	1.15887	0.875952	1.19327	0.218334	0.901955	0.499761
A3KP47	Uncharacterized protein OS=Danio rerio GN=zgc:162941 PE=2 SV=1 - [A3KP47_DANRE]	20.4533	8.63135	11.35	2	2	catalytic activity		metabolic process	Pf01464	1.21988	1.06221	1.06504	0.870751	0.46763	0.873073	0.350655
P60123	RuvB-like 1 OS=Rattus norvegicus GN=Ruvbl1 PE=1 SV=1 - [RUVB1_RAT]	50.1823	6.41748	11.4	4	2	nucleotide binding; catalytic activity	nucleus; organelle lumen; cytoplasm; Golgi; chromosome	metabolic process; response to stimulus; regulation of biological process; cell organization and biogenesis; cell division	Pf00004; Pf01078; Pf01695; Pf05496; Pf06068; Pf06414; Pf07726	1.61634	1.39206	1.84753	0.861243	0.422997	1.14303	0.166427
A4QN55	LOC566865 protein (Fragment) OS=Danio rerio GN=LOC566865 PE=2 SV=1 - [A4QN55_DANRE]	43.5814	6.99072	11.41	3	4	transporter activity	membrane	transport	Pf00650; Pf03765	0.924975	0.703466	0.867487	0.760525	0.0990361	0.937849	0.715149
Q9EQP5	Prolargin OS=Rattus norvegicus GN=Prelp PE=2 SV=1 - [PRELP_RAT]	43.1519	9.45166	11.41	4	1	protein binding	extracellular		Pf01462; Pf12799	0.856775	0.913543	0.854684	1.06626	0.570793	0.99756	0.885775
Q6DRI1	Eukaryotic translation initiation factor 3 subunit E-A OS=Danio rerio GN=eif3ea PE=2 SV=2 - [EI3EA_DANRE]	52.3555	6.13818	11.43	5	5	RNA binding; protein binding	nucleus; cytoplasm	metabolic process; development	Pf01399; Pf09440	2.05784	1.85973	2.5385	0.903731	0.636376	1.23358	0.0376857
D3ZRF5	Protein Slc25a22 OS=Rattus norvegicus GN=Slc25a22 PE=3 SV=1 - [D3ZRF5_RAT]	34.6401	9.08545	11.46	3	9	transporter activity	nucleus; cytoplasm; mitochondrion; membrane	transport	Pf00153	0.741423	0.779264	0.693683	1.05104	0.629776	0.935609	0.701024
Q6P7P5	Basic leucine zipper and W2 domain-containing protein 1 OS=Rattus norvegicus GN=Bzw1 PE=2 SV=1 - [BZW1_RAT]	48.0127	5.92236	11.46	4	10	protein binding	cytoplasm	metabolic process; regulation of biological process	Pf02020	0.926952	0.826573	0.90991	0.89171	0.572681	0.981615	0.997813
A4V6K8	Putative RNA helicase protein OS=Dugesia japonica PE=2 SV=1 - [A4V6K8_DUGJA]	59.17	8.76318	11.46	4	1	nucleotide binding; catalytic activity			Pf00270; Pf00271	2.05999	1.96619	1.89942	0.95447	0.920202	0.922056	0.617204
A5D6S3	Mut protein OS=Danio rerio GN=mut PE=2 SV=1 - [A5D6S3_DANRE]	83.4648	7.02002	11.49	2	1	catalytic activity; metal ion binding		metabolic process	Pf01642; Pf02310	1.38295	1.39225	1.01563	1.00673	0.81974	0.734397	0.0210572
F1Q9I2	Uncharacterized protein OS=Danio rerio GN=cyp46a2 PE=2 SV=1 - [F1Q9I2_DANRE]	50.852	7.32764	11.49	5	10	catalytic activity; metal ion binding	membrane	metabolic process	Pf00067	0.950515	0.946656	0.996764	0.995941	0.869488	1.04866	0.549357
D4A7D7	Hexose-6-phosphate dehydrogenase (Glucose 1-dehydrogenase) (Predicted), isoform CRA_b OS=Rattus norvegicus GN=H6pd PE=4 SV=1 - [D4A7D7_RAT]	89.7831	7.2251	11.54	8	1	nucleotide binding; catalytic activity	cytoplasm; mitochondrion	metabolic process; response to stimulus	Pf00479; Pf01182; Pf02781	0.75375	0.988355	0.700985	1.31125	0.073883	0.929995	0.665935
D4A8C7	Ubiquilin-1 OS=Rattus norvegicus GN=Ubqln1 PE=2 SV=1 - [D4A8C7_RAT]	58.5999	5.05908	11.57	3	9	protein binding	nucleus; organelle lumen; membrane	metabolic process	Pf00240; Pf00627; Pf03153; Pf11976	0.734056	0.753132	0.686288	1.02599	0.734085	0.934925	0.696724
Q5CZU9	Crystallin, zeta (Quinone reductase) OS=Danio rerio GN=cryz PE=2 SV=1 - [Q5CZU9_DANRE]	34.4698	8.22119	11.59	2	3	nucleotide binding; metal ion binding; catalytic activity		metabolic process	Pf00107; Pf08240	0.955867	1.07866	0.96176	1.12847	0.367326	1.00616	0.824399
F1Q9D4	Uncharacterized protein OS=Danio rerio GN=ugt1ab PE=2 SV=1 - [F1Q9D4_DANRE]	59.6468	8.77783	11.6	4	36	catalytic activity		metabolic process	Pf00201; Pf04101	0.762223	0.832465	0.812225	1.09215	0.478643	1.0656	0.456428
Q6PTJ5	Fructose-bisphosphate aldolase (Fragment) OS=Stylochus sp. KJP-2004 PE=2 SV=1 - [Q6PTJ5_9TURB]	21.6109	5.24951	11.73	6	2	catalytic activity		metabolic process	Pf00274	1.71106	1.51874	1.7446	0.887601	0.551434	1.0196	0.731799
Q3KRC3	Protein Srpr OS=Rattus norvegicus GN=Srpr PE=2 SV=1 - [Q3KRC3_RAT]	69.6132	8.95361	11.79	7	2	nucleotide binding; catalytic activity	cytoplasm; endoplasmic reticulum; membrane	metabolic process; transport	Pf00448; Pf02881; Pf04086	0.738165	0.633809	0.432781	0.858627	0.411086	0.586293	4.21053e-05
F1QZ45	Uncharacterized protein (Fragment) OS=Danio rerio PE=4 SV=1 - [F1QZ45_DANRE]	104.376	7.84033	11.83	4	1	transporter activity	membrane; cytoplasm	transport	Pf01602; Pf02296; Pf02883	1.44568	1.34936	1.36697	0.933378	0.800577	0.945557	0.764214
A2BHD8	Novel protein similar to vertebrate hexosaminidase A (Alpha polypeptide) (HEXA) OS=Danio rerio GN=hexb PE=4 SV=1 - [A2BHD8_DANRE]	61.4936	6.16357	11.83	5	5	catalytic activity		development; metabolic process	Pf00728; Pf02838	1.6357	1.43905	1.51557	0.879774	0.511806	0.926553	0.644666
Q4V7D1	Signal sequence receptor, alpha OS=Rattus norvegicus GN=Ssr1 PE=2 SV=1 - [Q4V7D1_RAT]	32.1872	4.43701	11.85	2	3		cytoplasm; endoplasmic reticulum; membrane		Pf03896	0.785423	0.671067	0.796131	0.854402	0.392202	1.01363	0.772382
Q66I21	Aldehyde dehydrogenase family 8 member A1 OS=Danio rerio GN=aldh8a1 PE=2 SV=1 - [AL8A1_DANRE]	53.3199	7.03467	11.91	3	1	catalytic activity	cytoplasm	metabolic process	Pf00171	0.937835	1.07078	1.22519	1.14176	0.331749	1.3064	0.00930082
F1R4Y9	Uncharacterized protein OS=Danio rerio GN=sult3st3 PE=4 SV=1 - [F1R4Y9_DANRE]	33.9582	6.29053	11.99	3	14	catalytic activity			Pf00685	1.10314	1.05225	1.10575	0.953863	0.916758	1.00236	0.851338
E7FE90	Uncharacterized protein OS=Danio rerio GN=fetub PE=4 SV=1 - [E7FE90_DANRE]	56.7144	6.78564	12.02	5	1	enzyme regulator activity	extracellular		Pf00031	1.10159	0.98894	1.1151	0.897743	0.604377	1.01227	0.781779
P41498	Low molecular weight phosphotyrosine protein phosphatase OS=Rattus norvegicus GN=Acp1 PE=1 SV=3 - [PPAC_RAT]	18.1398	6.52197	12.03	2	4	catalytic activity; protein binding	nucleus; cytoplasm; membrane	metabolic process; cell communication	Pf01451	0.713975	1.10557	0.750305	1.54846	0.00563052	1.05088	0.536544
Q568N9	Pyrophosphatase (Inorganic) 1 OS=Danio rerio GN=ppa1b PE=2 SV=1 - [Q568N9_DANRE]	32.6219	5.45264	12.03	2	2	metal ion binding; catalytic activity	cytoplasm	metabolic process	Pf00719	1.27525	1.40453	0.987767	1.10138	0.448388	0.774569	0.0595633
Q5BJ11	Guanine nucleotide binding protein (G protein), beta polypeptide 2 OS=Danio rerio GN=gnb2 PE=2 SV=1 - [Q5BJ11_DANRE]	37.33	5.99854	12.06	4	7	protein binding			Pf00400	1.89515	1.77675	1.83328	0.937526	0.824041	0.967351	0.905287
Q5U2Q7	Eukaryotic peptide chain release factor subunit 1 OS=Rattus norvegicus GN=Etf1 PE=2 SV=3 - [ERF1_RAT]	49.0002	5.70654	12.13	4	4	RNA binding	cytoplasm	metabolic process; cell organization and biogenesis	Pf03463; Pf03464; Pf03465	0.724006	0.973706	0.581431	1.34489	0.0527692	0.803074	0.110265
I1ZIA2	UDP galactose 4 epimerase OS=Schmidtea mediterranea PE=2 SV=1 - [I1ZIA2_SCHMD]	38.4828	7.94287	12.14	3	1	nucleotide binding; catalytic activity	membrane	metabolic process	Pf00106; Pf01073; Pf01370; Pf02719; Pf04321; Pf07993	2.05361	1.92747	2.30306	0.938576	0.829985	1.12146	0.226188
Q802W2	Aldehyde dehydrogenase family 9 member A1-B OS=Danio rerio GN=aldh9a1b PE=2 SV=2 - [A9A1B_DANRE]	56.4017	6.94678	12.16	4	1	catalytic activity	cytoplasm	metabolic process	Pf00171	1.05705	1.44855	1.11011	1.37037	0.0406016	1.05019	0.540495
Q5M7T6	ATPase, H+ transporting, lysosomal 38kDa, V0 subunit d1 OS=Rattus norvegicus GN=Atp6v0d1 PE=2 SV=1 - [Q5M7T6_RAT]	40.2752	4.99561	12.25	5	4	catalytic activity; transporter activity; protein binding	cytoplasm; endosome; membrane; vacuole	metabolic process; development; transport	Pf01992	1.66517	1.60609	1.79128	0.964523	0.977097	1.07574	0.405979
Q7TNB2	Troponin T, slow skeletal muscle OS=Rattus norvegicus GN=Tnnt1 PE=2 SV=3 - [TNNT1_RAT]	31.1961	6.07471	12.26	3	29	protein binding	cytoplasm; cytoskeleton	regulation of biological process	Pf00992	0.629645	0.672585	0.747091	1.0682	0.563529	1.18653	0.0847066
Q502D1	Glyoxalase domain-containing protein 5 OS=Danio rerio GN=glod5 PE=2 SV=1 - [GLOD5_DANRE]	17.8052	8.08936	12.27	2	1				Pf00903; Pf12681	0.99235	1.1746	0.966529	1.18366	0.236707	0.97398	0.948376
Q90WA5	Protein disulfide isomerase-related protein P5 OS=Danio rerio GN=pdip5 PE=2 SV=1 - [Q90WA5_DANRE]	47.9782	5.33838	12.27	4	2	catalytic activity		metabolic process; cellular homeostasis; regulation of biological process	Pf00085	1.27325	1.52437	1.20728	1.19723	0.211097	0.948192	0.781125
F1R3V9	Acyl-coenzyme A oxidase OS=Danio rerio GN=acox1 PE=2 SV=1 - [F1R3V9_DANRE]	74.0237	7.63525	12.27	5	4	catalytic activity	cytoplasm	metabolic process	Pf01756; Pf02770	1.06311	1.03636	1.0383	0.974837	0.969744	0.976663	0.965779
Q6DG81	Plastin 3 (T isoform) OS=Danio rerio GN=pls3 PE=2 SV=1 - [Q6DG81_DANRE]	70.1052	6.34131	12.28	2	1	protein binding; metal ion binding			Pf00307	1.26185	1.17907	1.23573	0.934404	0.806374	0.979303	0.982874
F1LRG1	Eukaryotic translation initiation factor 3 subunit A OS=Rattus norvegicus GN=Eif3a PE=2 SV=1 - [F1LRG1_RAT]	161.919	6.771	12.28	8	2	RNA binding; protein binding		metabolic process	Pf01399	0.716378	0.53952	0.57227	0.753123	0.0861152	0.798838	0.101212
F1QGW6	Uncharacterized protein OS=Danio rerio GN=eif2s3 PE=4 SV=1 - [F1QGW6_DANRE]	51.1892	8.00146	12.29	3	6	nucleotide binding; catalytic activity		metabolic process	Pf00009; Pf03144; Pf09173	1.30934	1.61696	1.41928	1.23494	0.151701	1.08397	0.367894
B3DFS9	Myosin, heavy polypeptide 11, smooth muscle OS=Danio rerio GN=myh11a PE=2 SV=1 - [B3DFS9_DANRE]	227.602	5.56689	12.31	8	6	nucleotide binding; catalytic activity; motor activity; protein binding	membrane; cytoskeleton	cell differentiation; development; regulation of biological process	Pf00038; Pf00063; Pf01576; Pf02463; Pf02736; Pf04156; Pf05557; Pf09726; Pf10174; Pf12128	1.40318	1.04677	1.1895	0.746003	0.0749049	0.847717	0.243058
Q4QRG3	Ubiquinol-cytochrome c reductase core protein II OS=Danio rerio GN=uqcrc2b PE=2 SV=1 - [Q4QRG3_DANRE]	48.1028	8.36768	12.33	4	4	catalytic activity; metal ion binding		metabolic process	Pf00675; Pf05193	1.24116	1.35179	1.15868	1.08914	0.488839	0.933544	0.688058
Q3B7E7	Sorting nexin 3 OS=Danio rerio GN=snx3 PE=2 SV=1 - [Q3B7E7_DANRE]	18.8468	8.63135	12.35	2	4	protein binding		cell communication	Pf00787	0.633542	1.14236	0.514164	1.80314	0.00024537	0.81157	0.13017
E7F8T6	Uncharacterized protein OS=Danio rerio GN=LOC100330160 PE=4 SV=1 - [E7F8T6_DANRE]	55.8967	6.60986	12.37	2	8	catalytic activity	cytoplasm	metabolic process	Pf04095	1.07931	1.04702	0.940536	0.970087	0.992735	0.871423	0.342956
F8W3L4	Glycine amidinotransferase, mitochondrial OS=Danio rerio GN=gatm PE=2 SV=1 - [F8W3L4_DANRE]	28.9704	6.31592	12.4	2	4					1.07495	1.10819	1.09027	1.03092	0.712883	1.01425	0.768117
Q502B9	ClpP caseinolytic peptidase, ATP-dependent, proteolytic subunit homolog (E. coli) OS=Danio rerio GN=clpp PE=2 SV=1 - [Q502B9_DANRE]	28.9207	7.1665	12.41	2	2	nucleotide binding; catalytic activity	cytoplasm	metabolic process	Pf00574	1.38287	1.1181	1.34795	0.808535	0.217949	0.974747	0.953354
F1RB68	Uncharacterized protein OS=Danio rerio GN=zgc:103559 PE=3 SV=1 - [F1RB68_DANRE]	50.1443	6.3667	12.42	4	2	catalytic activity; metal ion binding		metabolic process	Pf01979; Pf07969	1.09108	0.921205	1.02034	0.844303	0.348896	0.935159	0.698192
D4AE56	Prostaglandin E synthase 2 (Predicted), isoform CRA_b OS=Rattus norvegicus GN=Ptges2 PE=4 SV=1 - [D4AE56_RAT]	43.4242	9.24658	12.5	4	1	DNA binding; catalytic activity	nucleus; cytoplasm; mitochondrion; cytosol	cellular homeostasis; regulation of biological process; metabolic process; transport	Pf00462	0.627799	0.450264	0.412604	0.71721	0.0404109	0.657223	0.00142928
Q66H80	Coatomer subunit delta OS=Rattus norvegicus GN=Arcn1 PE=2 SV=1 - [COPD_RAT]	57.1632	6.21436	12.52	3	2	protein binding	cytoplasm; Golgi; membrane	transport	Pf00928	0.410967	0.318283	0.38784	0.774473	0.127115	0.943724	0.752488
A2BIN5	Uncharacterized protein OS=Danio rerio GN=mccc2 PE=4 SV=1 - [A2BIN5_DANRE]	61.6828	8.22119	12.54	2	2	catalytic activity			Pf01039	0.874225	1.32682	1.04955	1.51771	0.00804525	1.20054	0.067102
E7F6B7	Uncharacterized protein OS=Danio rerio GN=a1cf PE=4 SV=1 - [E7F6B7_DANRE]	64.4238	8.5874	12.59	2	1	nucleotide binding; RNA binding	membrane		Pf00076	0.588203	0.921691	0.836062	1.56696	0.00453086	1.42138	0.000753683
Q4AEF8	Coatomer subunit gamma-1 OS=Rattus norvegicus GN=Copg1 PE=2 SV=1 - [COPG1_RAT]	97.5515	5.38916	12.59	5	2	structural molecule activity	cytoplasm; Golgi; membrane; nucleus	transport; cellular component movement	Pf01602; Pf08752	1.12181	1.33925	0.870925	1.19383	0.217292	0.776357	0.0620834
O35142	Coatomer subunit beta' OS=Rattus norvegicus GN=Copb2 PE=1 SV=3 - [COPB2_RAT]	102.486	5.2749	12.6	3	2	protein binding; structural molecule activity	cytoplasm; Golgi; membrane; cytoskeleton	transport	Pf00400; Pf04053	1.64601	1.36957	1.092	0.832055	0.300014	0.66342	0.00184484
A8WGB0	Uncharacterized protein OS=Danio rerio GN=zgc:172295 PE=2 SV=1 - [A8WGB0_DANRE]	58.1533	6.16357	12.64	2	3	catalytic activity		metabolic process	Pf00370; Pf02782	1.33072	1.26421	1.24851	0.950015	0.894916	0.938222	0.717503
P85972	Vinculin OS=Rattus norvegicus GN=Vcl PE=1 SV=1 - [VINC_RAT]	116.542	6.0874	12.66	9	4	protein binding; catalytic activity; structural molecule activity	cytoskeleton; cytoplasm; membrane	transport; cell organization and biogenesis; cellular component movement; regulation of biological process	Pf01044; Pf02901; Pf04632	0.375928	0.287981	0.420601	0.766054	0.10957	1.11884	0.234494
Q6NZW5	Hsd17b4 protein OS=Danio rerio GN=hsd17b4 PE=2 SV=1 - [Q6NZW5_DANRE]	78.6375	7.54736	12.69	5	3	nucleotide binding; catalytic activity		metabolic process	Pf00106; Pf01575; Pf02036; Pf08659	0.871547	0.868833	0.849179	0.996887	0.86508	0.974335	0.950679
Q2L6M2	Innexin1 OS=Dugesia japonica GN=inx1 PE=2 SV=1 - [Q2L6M2_DUGJA]	27.3549	7.03467	12.71	2	1				Pf00876	2.23644	1.99884	2.37845	0.893759	0.583381	1.0635	0.467381
Q9Z2Z8	7-dehydrocholesterol reductase OS=Rattus norvegicus GN=Dhcr7 PE=2 SV=1 - [DHCR7_RAT]	54.1194	8.35303	12.74	5	1	catalytic activity	membrane; nucleus; cytoplasm; endoplasmic reticulum	development; metabolic process; cell differentiation; cell proliferation; regulation of biological process	Pf01222	0.520567	0.440952	0.446244	0.84706	0.360457	0.857226	0.280681
Q7ZU44	High density lipoprotein-binding protein (Vigilin) OS=Danio rerio GN=hdlbp PE=2 SV=1 - [Q7ZU44_DANRE]	134.62	6.7417	12.75	7	6	RNA binding		response to stimulus	Pf00013	1.22068	1.20948	1.18886	0.99083	0.893441	0.973936	0.948087
F1QLQ9	Uncharacterized protein OS=Danio rerio GN=si:ch211-93f2.1 PE=2 SV=1 - [F1QLQ9_DANRE]	182.557	5.2876	12.79	13	4	catalytic activity	membrane	metabolic process	Pf00135; Pf00326; Pf07859	1.11495	1.07896	1.06559	0.967721	0.995107	0.955727	0.829773
D4ACG2	IlvB (Bacterial acetolactate synthase)-like (Predicted), isoform CRA_c OS=Rattus norvegicus GN=Ilvbl PE=3 SV=1 - [D4ACG2_RAT]	72.224	8.27979	12.8	6	3	metal ion binding; catalytic activity		metabolic process	Pf00205; Pf02775; Pf02776	1.27323	1.74353	1.38735	1.36938	0.0410213	1.08963	0.343182
F1LW44	Neurolysin, mitochondrial (Fragment) OS=Rattus norvegicus GN=Nln PE=2 SV=1 - [F1LW44_RAT]	80.1775	6.58057	12.8	7	2	catalytic activity; metal ion binding		metabolic process	Pf01432	0.377858	0.267455	0.333384	0.707818	0.0324001	0.882298	0.395406
F1QH34	Eukaryotic initiation factor 4A-III OS=Danio rerio GN=eif4a3 PE=2 SV=1 - [F1QH34_DANRE]	46.448	6.7124	12.81	2	3	nucleotide binding; catalytic activity			Pf00270; Pf00271	0.978969	1.09627	0.868101	1.11982	0.391929	0.886751	0.418012
G3V6P9	Protein Sptbn1 OS=Rattus norvegicus GN=Sptbn1 PE=4 SV=1 - [G3V6P9_RAT]	250.863	5.5542	12.86	13	8	protein binding; structural molecule activity	nucleus; organelle lumen; cytoplasm; membrane; cytoskeleton	cell division; cell organization and biogenesis; cell communication; metabolic process; regulation of biological process; response to stimulus; transport	Pf00307; Pf00435; Pf11971; Pf12128	0.917669	0.778924	0.764857	0.848807	0.367883	0.833478	0.19295
Q5U302	Catenin (Cadherin associated protein), alpha 1 OS=Rattus norvegicus GN=Ctnna1 PE=2 SV=1 - [Q5U302_RAT]	100.174	6.22705	12.89	4	1	structural molecule activity; protein binding	cytoplasm; membrane; cytoskeleton	development; reproduction; cell differentiation; cell proliferation; regulation of biological process; response to stimulus; cell organization and biogenesis; cell death; cell communication	Pf01044	0.531181	0.383038	0.375473	0.721107	0.044161	0.706864	0.00904347
Q6IRK9	Carboxypeptidase Q OS=Rattus norvegicus GN=Cpq PE=1 SV=1 - [CBPQ_RAT]	52.0086	6.41748	12.92	5	1	catalytic activity; protein binding; metal ion binding	extracellular; cytoplasm; vacuole; endoplasmic reticulum; Golgi	metabolic process; response to stimulus	Pf04389	0.939381	0.877716	0.978985	0.934356	0.806102	1.04216	0.587743
B3DKM0	Aldehyde dehydrogenase 1 family, member A2 OS=Danio rerio GN=aldh1a2 PE=2 SV=1 - [B3DKM0_DANRE]	56.4877	6.22705	12.93	3	5	catalytic activity		development; metabolic process; cell communication; cell differentiation; cellular homeostasis; response to stimulus; regulation of biological process	Pf00171	1.36422	1.77205	1.59565	1.29894	0.0833273	1.16964	0.11107
F1LYT0	Phosphatidylinositide phosphatase SAC1 (Fragment) OS=Rattus norvegicus GN=Sacm1l PE=2 SV=1 - [F1LYT0_RAT]	66.877	7.41553	12.95	7	4	catalytic activity	membrane		Pf02383	0.97206	0.761525	0.746521	0.783413	0.147816	0.767979	0.0509539
A2RV38	DEAD (Asp-Glu-Ala-Asp) box polypeptide 3 OS=Danio rerio GN=ddx3 PE=2 SV=1 - [A2RV38_DANRE]	78.3467	8.32373	12.98	2	3	nucleotide binding; catalytic activity			Pf00270; Pf00271	0.601824	0.528265	0.652358	0.877772	0.501862	1.08397	0.367896
A4FUP1	Histidine ammonia-lyase OS=Danio rerio GN=hal PE=2 SV=1 - [A4FUP1_DANRE]	72.0812	6.60986	13	6	1	catalytic activity	cytoplasm	metabolic process	Pf00221; Pf12053	1.14522	1.1302	1.0602	0.986877	0.912123	0.925761	0.639804
B2RYX0	Naca protein OS=Rattus norvegicus GN=Naca PE=2 SV=1 - [B2RYX0_RAT]	23.3697	4.56396	13.02	2	3	protein binding	nucleus; cytoplasm		Pf01849	0.517167	0.411763	0.493572	0.796189	0.181238	0.954376	0.821031
Q3KRE0	ATPase family AAA domain-containing protein 3 OS=Rattus norvegicus GN=Atad3 PE=1 SV=1 - [ATAD3_RAT]	66.7175	9.29053	13.03	6	3	nucleotide binding; RNA binding; catalytic activity	cytoplasm; mitochondrion; membrane; organelle lumen	metabolic process; cell growth; cell death; regulation of biological process	Pf00004; Pf00910; Pf01078; Pf05707; Pf07728; Pf12037	0.886722	0.797532	0.753892	0.899416	0.613267	0.850201	0.252565
Q6AZ50	Ubiquitin-like-conjugating enzyme ATG3 OS=Rattus norvegicus GN=Atg3 PE=2 SV=1 - [ATG3_RAT]	35.7995	4.7417	13.06	3	2	catalytic activity; protein binding	cytoplasm; cytosol	cell communication; cell organization and biogenesis; metabolic process; response to stimulus; transport; cell death	Pf03986; Pf03987; Pf10381	1.18316	1.36087	1.17567	1.1502	0.310554	0.993666	0.913984
E9QIX6	Uncharacterized protein OS=Danio rerio GN=c9 PE=2 SV=1 - [E9QIX6_DANRE]	71.4814	5.63037	13.07	7	4	protein binding	membrane	response to stimulus	Pf00057; Pf01823	1.09193	1.07588	1.08912	0.985298	0.919619	0.997426	0.886744
Q6PFS4	Inner membrane protein, mitochondrial (Mitofilin) OS=Danio rerio GN=immt PE=2 SV=1 - [Q6PFS4_DANRE]	83.1488	5.42725	13.08	6	1		cytoplasm; mitochondrion; membrane		Pf09731; Pf12128	1.19661	1.3224	1.25022	1.10512	0.436492	1.0448	0.571991
E7FDF9	Malate synthase OS=Danio rerio GN=LOC564844 PE=3 SV=1 - [E7FDF9_DANRE]	62.4458	6.354	13.11	6	1	catalytic activity		metabolic process	Pf01274	1.34688	1.31206	1.05497	0.97415	0.973062	0.783267	0.0726008
Q7ZUD6	Reticulon 3 OS=Danio rerio GN=rtn3 PE=2 SV=1 - [Q7ZUD6_DANRE]	24.48	8.96826	13.12	2	2		cytoplasm; endoplasmic reticulum		Pf02453	1.3327	1.42458	1.72539	1.06895	0.560744	1.29466	0.0117839
Q62667	Major vault protein OS=Rattus norvegicus GN=Mvp PE=1 SV=4 - [MVP_RAT]	95.7391	5.57959	13.12	8	2	protein binding	nucleus; cytoplasm		Pf01145; Pf01505; Pf11978	1.6795	1.44399	2.02884	0.859769	0.416268	1.208	0.0591067
G3V6A4	Heterogeneous nuclear ribonucleoprotein D, isoform CRA_b OS=Rattus norvegicus GN=Hnrpd PE=4 SV=1 - [G3V6A4_RAT]	32.652	8.1626	13.16	3	4	nucleotide binding; RNA binding; DNA binding	nucleus; organelle lumen; cytoplasm; cytosol	metabolic process; transport; regulation of biological process	Pf00076	1.02263	0.996281	0.934745	0.974235	0.972652	0.914061	0.569367
Q6TGU8	Ribosome binding protein 1 homolog 180kDa OS=Danio rerio GN=rrbp1b PE=2 SV=1 - [Q6TGU8_DANRE]	109.534	4.91943	13.19	11	3		membrane; cytoplasm; endoplasmic reticulum	transport	Pf05104; Pf09726; Pf12128	1.40375	1.41011	1.29551	1.00453	0.829775	0.922895	0.622294
F6P3G4	26S proteasome non-ATPase regulatory subunit 11A OS=Danio rerio GN=psmd11a PE=2 SV=1 - [PS11A_DANRE]	47.3439	5.99854	13.3	2	1	protein binding	proteasome	metabolic process; cell organization and biogenesis; cell differentiation	Pf01399	1.15908	1.46476	1.23523	1.26372	0.116535	1.06569	0.455942
H9GYQ0	Uncharacterized protein (Fragment) OS=Danio rerio PE=4 SV=1 - [H9GYQ0_DANRE]	33.6893	9.0415	13.33	2	2	catalytic activity		metabolic process	Pf00326; Pf00561; Pf01738; Pf05448; Pf12695; Pf12697	0.814601	0.618462	1.05817	0.75922	0.0966628	1.299	0.0108022
E7EY75	Uncharacterized protein OS=Danio rerio GN=ncl PE=4 SV=1 - [E7EY75_DANRE]	72.1561	4.65283	13.37	7	7	nucleotide binding			Pf00076	0.957209	0.983594	0.951024	1.02756	0.727268	0.993538	0.914911
Q6AY58	B-cell receptor-associated protein 31 OS=Rattus norvegicus GN=Bcap31 PE=2 SV=1 - [Q6AY58_RAT]	27.894	8.88037	13.47	3	1		cytoplasm; Golgi; membrane; endoplasmic reticulum	transport; response to stimulus; cellular homeostasis; cell communication; regulation of biological process; cell death; metabolic process	Pf05529	0.819567	0.647931	0.775579	0.790578	0.165993	0.946328	0.769157
B0S709	Novel protein similar to vertebrate alanyl-tRNA synthetase (AARS) OS=Danio rerio GN=DKEY-151P17.1-002 PE=2 SV=1 - [B0S709_DANRE]	106.44	5.45264	13.5	5	10	nucleotide binding; catalytic activity	cytoplasm	metabolic process	Pf01411; Pf02272; Pf07973	1.30021	1.19895	1.34761	0.922124	0.737369	1.03646	0.622636
Q566W6	Uncharacterized protein OS=Danio rerio GN=zgc:112425 PE=2 SV=1 - [Q566W6_DANRE]	18.4435	8.80713	13.51	2	1	nucleotide binding			Pf00076; Pf08777	1.01695	0.85449	0.960846	0.840251	0.332273	0.944834	0.759589
Q6NYL3	Peroxisomal bifunctional enzyme OS=Danio rerio GN=ehhadh PE=2 SV=1 - [ECHP_DANRE]	78.4581	9.01221	13.51	8	1	nucleotide binding; catalytic activity	cytoplasm	metabolic process	Pf00378; Pf00725; Pf02737	0.968433	1.12277	0.835232	1.15936	0.288742	0.862457	0.302788
A9JSY9	Dimethylaniline monooxygenase [N-oxide-forming] OS=Danio rerio GN=si:dkey-239i20.2 PE=2 SV=1 - [A9JSY9_DANRE]	63.7614	8.70459	13.52	7	7	catalytic activity; nucleotide binding	cytoplasm; endoplasmic reticulum; membrane	metabolic process	Pf00743; Pf07992	1.05072	1.04606	1.06037	0.995561	0.871261	1.00918	0.803274
Q5RKM2	NADH dehydrogenase (Ubiquinone) Fe-S protein 1 OS=Danio rerio GN=ndufs1 PE=2 SV=1 - [Q5RKM2_DANRE]	79.3824	6.15088	13.54	6	2	catalytic activity	cytoplasm; membrane; mitochondrion	metabolic process	Pf00111; Pf00384; Pf09326; Pf10588	1.03068	1.18305	1.1526	1.14784	0.316372	1.11829	0.236234
Q9Z269	Vesicle-associated membrane protein-associated protein B OS=Rattus norvegicus GN=Vapb PE=1 SV=3 - [VAPB_RAT]	26.899	7.78174	13.58	2	1	structural molecule activity; protein binding	cytoplasm; endoplasmic reticulum; membrane; Golgi	cellular homeostasis; response to stimulus; cell communication; metabolic process; regulation of biological process; reproduction	Pf00635	1.02494	0.924622	1.0033	0.902119	0.627716	0.978883	0.980155
G3V7Y3	ATP synthase subunit delta, mitochondrial OS=Rattus norvegicus GN=Atp5d PE=3 SV=1 - [G3V7Y3_RAT]	17.5522	5.23682	13.69	2	2	nucleotide binding; catalytic activity; protein binding; transporter activity	cytoplasm; membrane; mitochondrion	metabolic process; transport	Pf02823	0.332486	0.321328	0.27303	0.96644	0.9879	0.821178	0.155618
F1R3D3	Glyceraldehyde-3-phosphate dehydrogenase OS=Danio rerio GN=gapdhs PE=2 SV=1 - [F1R3D3_DANRE]	36.0701	7.03467	13.73	3	5	nucleotide binding; catalytic activity		metabolic process	Pf00044; Pf02800	0.736353	0.940361	0.798798	1.27705	0.102805	1.0848	0.364171
F1QIC0	Uncharacterized protein OS=Danio rerio GN=cbsb PE=4 SV=1 - [F1QIC0_DANRE]	65.8175	6.66846	13.74	2	4	catalytic activity; protein binding	cytoplasm	metabolic process	Pf00291; Pf00571	0.69906	0.808137	0.724395	1.15603	0.296526	1.03624	0.623978
F1RBK3	Pyruvate kinase OS=Danio rerio GN=pkmb PE=3 SV=1 - [F1RBK3_DANRE]	58.3032	7.28369	13.77	3	5	metal ion binding; catalytic activity		metabolic process	Pf00224; Pf00945; Pf02887	1.77869	1.46654	1.87875	0.824508	0.271959	1.05626	0.506355
F1LV13	Protein Hnrpm OS=Rattus norvegicus GN=Hnrpm PE=4 SV=1 - [F1LV13_RAT]	73.6734	8.74854	13.77	7	6	nucleotide binding; RNA binding; protein binding	nucleus; organelle lumen; spliceosomal complex	metabolic process	Pf00076; Pf11532; Pf11608	0.743784	0.711639	0.787896	0.956782	0.933315	1.05931	0.489702
A9JT52	Acadvl protein OS=Danio rerio GN=acadvl PE=2 SV=1 - [A9JT52_DANRE]	71.0485	8.41162	13.81	7	4	catalytic activity		metabolic process	Pf00441; Pf02770; Pf02771; Pf08028	1.07342	1.30223	1.12062	1.21316	0.184002	1.04397	0.576903
B2GTW6	Citrate synthase OS=Danio rerio GN=cs PE=2 SV=1 - [B2GTW6_DANRE]	51.7503	7.85498	13.89	3	2	catalytic activity	cytoplasm; mitochondrion; organelle lumen	metabolic process; response to stimulus	Pf00285	1.11149	1.00285	1.09039	0.902255	0.628443	0.981016	0.993947
Q7ZUN7	Creatine kinase, mitochondrial 1 OS=Danio rerio GN=ckmt1 PE=2 SV=1 - [Q7ZUN7_DANRE]	46.6768	7.91357	13.91	4	10	nucleotide binding; catalytic activity		metabolic process	Pf00217; Pf02807	1.00339	1.49291	1.06775	1.48787	0.011309	1.06415	0.46399
Q6P7A4	Prosaposin OS=Rattus norvegicus GN=Psap PE=2 SV=1 - [Q6P7A4_RAT]	60.9995	5.24951	13.92	7	2		extracellular; cytoplasm; mitochondrion; vacuole; Golgi	metabolic process; regulation of biological process; cell communication; response to stimulus; transport; development; reproduction; cell differentiation	Pf02199; Pf03489; Pf05184	0.618032	0.707548	0.697289	1.14484	0.323889	1.12824	0.205827
Q6PBX8	Uncharacterized protein OS=Danio rerio GN=ndufv2 PE=2 SV=1 - [Q6PBX8_DANRE]	26.5783	5.63037	13.93	3	1	catalytic activity; metal ion binding; nucleotide binding	cytoplasm; membrane; mitochondrion	metabolic process	Pf01257	1.09907	1.67111	1.31307	1.52048	0.00779243	1.1947	0.0740069
F1QVL9	Uncharacterized protein OS=Danio rerio GN=cyp2k19 PE=2 SV=1 - [F1QVL9_DANRE]	44.3057	6.81494	13.95	4	15	catalytic activity; metal ion binding	membrane	metabolic process	Pf00067	1.28302	0.948369	1.18658	0.739171	0.0652128	0.924834	0.634125
E7FE69	Uncharacterized protein OS=Danio rerio GN=upp1 PE=4 SV=1 - [E7FE69_DANRE]	34.7434	6.37939	13.97	2	1	catalytic activity	cytoplasm; membrane	metabolic process	Pf01048	1.06399	0.969565	0.865171	0.911251	0.677231	0.813135	0.134099
Q4FZT9	26S proteasome non-ATPase regulatory subunit 2 OS=Rattus norvegicus GN=Psmd2 PE=2 SV=1 - [PSMD2_RAT]	100.124	5.19873	13.99	3	1	enzyme regulator activity	proteasome	metabolic process; regulation of biological process	Pf01851	0.796394	0.874054	0.855717	1.09751	0.460891	1.07449	0.411974
F8W3Q0	Uncharacterized protein OS=Danio rerio GN=si:ch73-361h17.1 PE=4 SV=1 - [F8W3Q0_DANRE]	34.0605	6.32861	14.05	3	1				Pf00059; Pf10146	1.24957	1.29632	1.15702	1.03741	0.68544	0.92594	0.640902
Q9PUE4	Coatomer subunit gamma-2 OS=Danio rerio GN=copg2 PE=2 SV=2 - [COPG2_DANRE]	97.4663	5.66846	14.09	3	2	structural molecule activity	cytoplasm; Golgi; membrane	transport	Pf01602; Pf08752	1.02845	1.20822	1.05374	1.17479	0.254748	1.02459	0.698625
O88637	Ethanolamine-phosphate cytidylyltransferase OS=Rattus norvegicus GN=Pcyt2 PE=1 SV=1 - [PCY2_RAT]	45.1915	6.66846	14.11	5	5	catalytic activity		metabolic process	Pf01467	0.780733	0.714662	0.598813	0.915373	0.699896	0.766988	0.0497487
F1LXX9	Phytanoyl-CoA dioxygenase domain-containing protein 1 (Fragment) OS=Rattus norvegicus GN=Phyhd1 PE=2 SV=1 - [F1LXX9_RAT]	32.167	5.5542	14.14	3	4				Pf05721	0.815807	0.79663	0.811982	0.976494	0.961759	0.995312	0.902032
E7FDY7	Glucose-6-phosphate 1-dehydrogenase OS=Danio rerio GN=g6pd PE=3 SV=1 - [E7FDY7_DANRE]	59.6572	6.84424	14.15	4	1	nucleotide binding; catalytic activity	membrane	metabolic process	Pf00479; Pf02781	0.853451	0.756443	0.907012	0.886334	0.544944	1.06276	0.471273
P12711	Alcohol dehydrogenase class-3 OS=Rattus norvegicus GN=Adh5 PE=1 SV=2 - [ADHX_RAT]	39.5502	7.48877	14.17	5	5	nucleotide binding; catalytic activity; metal ion binding; protein binding	nucleus; cytoplasm; mitochondrion	metabolic process; response to stimulus	Pf00107; Pf08240	0.622317	0.709828	0.569841	1.14062	0.334692	0.915676	0.578918
C0KQW5	SPARC-like protein OS=Dugesia japonica PE=2 SV=1 - [C0KQW5_DUGJA]	29.6817	5.04639	14.23	2	1	metal ion binding	extracellular	cell communication; regulation of biological process; response to stimulus	Pf10591	1.77668	1.50424	2.15864	0.84666	0.358766	1.21499	0.0523855
F1QWK0	Uncharacterized protein OS=Danio rerio GN=zgc:103601 PE=3 SV=1 - [F1QWK0_DANRE]	33.1008	6.31592	14.24	4	3	catalytic activity		metabolic process	Pf00797	1.10041	1.13656	1.16036	1.03285	0.704655	1.05448	0.516218
A8E5C2	Serpin peptidase inhibitor, clade A (Alpha-1 antiproteinase, antitrypsin), member 7 OS=Danio rerio GN=serpina7 PE=2 SV=1 - [A8E5C2_DANRE]	42.9364	5.30029	14.25	5	4	enzyme regulator activity		metabolic process; regulation of biological process	Pf00079	0.906609	0.853679	0.938409	0.941618	0.847235	1.03508	0.631251
E9QCD1	Uncharacterized protein OS=Danio rerio GN=fga PE=2 SV=1 - [E9QCD1_DANRE]	49.6479	7.04932	14.25	7	3	protein binding	extracellular	cell communication; regulation of biological process; response to stimulus; coagulation; cell organization and biogenesis	Pf08702	1.13614	0.978072	1.26075	0.860871	0.421293	1.10968	0.265283
F1LP30	Methylcrotonoyl-CoA carboxylase subunit alpha, mitochondrial OS=Rattus norvegicus GN=Mccc1 PE=2 SV=1 - [F1LP30_RAT]	79.2454	7.13721	14.27	7	3	catalytic activity; nucleotide binding; metal ion binding	cytoplasm; mitochondrion; membrane	metabolic process	Pf00289; Pf00364; Pf02785; Pf02786; Pf07478	0.797763	0.738805	0.732866	0.926096	0.759587	0.918651	0.596664
Q68FX0	Isocitrate dehydrogenase [NAD] subunit beta, mitochondrial OS=Rattus norvegicus GN=Idh3B PE=1 SV=1 - [IDH3B_RAT]	42.3268	8.74854	14.29	2	2	metal ion binding; catalytic activity; nucleotide binding	cytoplasm; mitochondrion; organelle lumen	metabolic process	Pf00180	0.969373	1.02032	0.92886	1.05256	0.623721	0.958206	0.845851
G3V9U7	ATPase, Ca++ transporting, ubiquitous, isoform CRA_b OS=Rattus norvegicus GN=Atp2a3 PE=3 SV=1 - [G3V9U7_RAT]	109.295	5.64307	14.31	2	4	nucleotide binding; catalytic activity; transporter activity; metal ion binding	cytoplasm; endoplasmic reticulum; membrane; nucleus	metabolic process; transport	Pf00122; Pf00689; Pf00690; Pf00702; Pf08282; Pf12710	2.21961	2.03519	2.0612	0.916911	0.708397	0.92863	0.657477
F1LQS6	Xanthine dehydrogenase/oxidase (Fragment) OS=Rattus norvegicus GN=Xdh PE=2 SV=1 - [F1LQS6_RAT]	135.295	7.00537	14.31	11	1	catalytic activity; metal ion binding	membrane	metabolic process	Pf00941; Pf01315; Pf01799; Pf02738; Pf03450; Pf11715	0.881412	0.896298	1.08893	1.01689	0.774007	1.23544	0.0364405
A3KPG5	Uncharacterized protein OS=Danio rerio GN=crp3 PE=4 SV=1 - [A3KPG5_DANRE]	25.0006	5.04639	14.35	3	4				Pf00354	0.807586	0.876506	0.88362	1.08534	0.501865	1.09415	0.32433
H9CXT9	KHD-1 OS=Schmidtea mediterranea PE=2 SV=1 - [H9CXT9_SCHMD]	33.5783	8.82178	14.38	5	1	RNA binding				1.91074	1.86411	2.13745	0.975597	0.966077	1.11865	0.235092
F1QR23	Uncharacterized protein OS=Danio rerio GN=ssr1 PE=2 SV=1 - [F1QR23_DANRE]	30.2959	4.17041	14.39	2	2		cytoplasm; endoplasmic reticulum; membrane		Pf03896	1.0492	1.3429	1.0211	1.27993	0.100033	0.973216	0.943416
Q5XI85	Aminomethyltransferase OS=Rattus norvegicus GN=Amt PE=2 SV=1 - [Q5XI85_RAT]	44.0359	8.95361	14.39	6	1	catalytic activity	cytoplasm; mitochondrion	metabolic process	Pf01571; Pf08669	0.522166	0.557575	0.578154	1.06781	0.564967	1.10722	0.274036
Q6AXN3	Transmembrane emp24 domain-containing protein 5 OS=Rattus norvegicus GN=Tmed5 PE=2 SV=1 - [TMED5_RAT]	26.1191	4.75439	14.41	3	2		cytoplasm; endoplasmic reticulum; membrane; Golgi	transport; cell organization and biogenesis	Pf01105	0.432403	0.424191	0.562771	0.98101	0.940074	1.3015	0.0102718
Q6P696	Glyoxalase 1 OS=Danio rerio GN=glo1 PE=2 SV=1 - [Q6P696_DANRE]	20.2879	5.41455	14.44	2	1	catalytic activity; metal ion binding			Pf00903; Pf12681	1.28083	1.22716	1.20914	0.958103	0.940799	0.944035	0.754477
F1Q4N4	Uncharacterized protein OS=Danio rerio GN=ndufs2 PE=3 SV=1 - [F1Q4N4_DANRE]	52.6783	6.84424	14.44	2	3	catalytic activity; nucleotide binding	membrane	transport; metabolic process	Pf00346	1.12565	1.11842	1.11933	0.993577	0.880537	0.994379	0.908798
A0PJ30	Cytochrome P450 CYP2Y3 OS=Danio rerio GN=cyp2y3 PE=2 SV=1 - [A0PJ30_DANRE]	56.9177	9.21729	14.46	6	3	catalytic activity; metal ion binding		metabolic process	Pf00067	1.27586	1.18794	1.20326	0.931092	0.78768	0.943101	0.74851
Q5I0N5	Agxt protein (Fragment) OS=Rattus norvegicus GN=Agxt PE=2 SV=1 - [Q5I0N5_RAT]	43.6419	8.33838	14.47	5	2	catalytic activity; protein binding	cytoplasm; mitochondrion; organelle lumen	cell organization and biogenesis; transport; metabolic process; response to stimulus	Pf00266	0.687285	0.635779	0.66399	0.925058	0.753769	0.966105	0.897184
Q6P5I9	Serpina1 protein (Fragment) OS=Danio rerio GN=serpina1 PE=2 SV=1 - [Q6P5I9_DANRE]	48.3428	6.3667	14.48	2	4	enzyme regulator activity		metabolic process; regulation of biological process	Pf00079	0.956008	1.0195	0.859005	1.06642	0.570197	0.898534	0.480785
A9C460	Uncharacterized protein OS=Danio rerio GN=si:ch211-170d8.5 PE=4 SV=1 - [A9C460_DANRE]	30.1647	5.79541	14.5	3	3				Pf00059	1.29621	1.24807	1.43064	0.962854	0.967677	1.10371	0.286944
A7YYI1	Zgc:64031 OS=Danio rerio GN=abhd14b PE=2 SV=1 - [A7YYI1_DANRE]	22.8368	5.2749	14.55	2	2	catalytic activity			Pf00561; Pf01738; Pf12695; Pf12697	1.57366	1.99201	1.50386	1.26585	0.114241	0.95565	0.829274
Q6DGA0	Zgc:91854 OS=Danio rerio GN=blvrb PE=2 SV=1 - [Q6DGA0_DANRE]	21.117	8.54346	14.58	3	3	nucleotide binding; catalytic activity		metabolic process	Pf01073; Pf01370	1.1358	1.03046	1.0772	0.907249	0.655406	0.948405	0.782498
Q4L216	Type IV antifreeze protein OS=Danio rerio GN=zgc:161979 PE=2 SV=1 - [Q4L216_DANRE]	14.1855	5.23682	14.62	2	2		extracellular	transport; metabolic process	Pf01442	0.888848	0.885129	0.946938	0.995816	0.870067	1.06535	0.457702
F1QC05	Uncharacterized protein OS=Danio rerio GN=ephx1 PE=2 SV=1 - [F1QC05_DANRE]	51.9346	8.52881	14.69	4	2	catalytic activity	membrane	metabolic process; response to stimulus	Pf00561; Pf06441; Pf12697	1.26162	1.36368	1.30797	1.0809	0.517409	1.03674	0.620896
Q5XI32	F-actin-capping protein subunit beta OS=Rattus norvegicus GN=Capzb PE=1 SV=1 - [CAPZB_RAT]	30.6094	5.99854	14.71	4	4	protein binding	cytoplasm; cytoskeleton; membrane	cell organization and biogenesis; regulation of biological process	Pf01115	1.09912	1.07991	1.08445	0.982525	0.932831	0.986657	0.965278
Q567N5	Ribosomal protein L6 OS=Danio rerio GN=rpl6 PE=2 SV=1 - [Q567N5_DANRE]	30.5222	11.063	14.72	2	2	structural molecule activity	cytoplasm; ribosome	metabolic process; development	Pf01159; Pf03868	1.45376	1.39207	1.46755	0.957562	0.937737	1.00949	0.801088
F8WFQ1	EH domain-containing protein 1 (Fragment) OS=Rattus norvegicus GN=Ehd1 PE=4 SV=1 - [F8WFQ1_RAT]	55.418	9.20264	14.72	7	14	catalytic activity; nucleotide binding		metabolic process	Pf00350; Pf01926	1.507	1.44039	1.62948	0.955798	0.927735	1.08127	0.380087
P12075	Cytochrome c oxidase subunit 5B, mitochondrial OS=Rattus norvegicus GN=Cox5b PE=1 SV=2 - [COX5B_RAT]	13.9059	7.78174	14.73	2	1	catalytic activity; transporter activity; metal ion binding	cytoplasm; mitochondrion; membrane	response to stimulus	Pf01215	0.326547	0.266581	0.222453	0.816361	0.243496	0.681226	0.0036866
O42344	Ep37-A2 OS=Cynops pyrrhogaster PE=2 SV=1 - [O42344_CYNPY]	37.9096	6.32861	14.84	3	1		extracellular		Pf00030; Pf01117; Pf03318	0.851984	1.04416	1.1519	1.22556	0.164976	1.35202	0.00357386
Q6NYE1	Fibrinogen, B beta polypeptide OS=Danio rerio GN=fgb PE=2 SV=1 - [Q6NYE1_DANRE]	54.3726	7.84033	14.85	5	2	protein binding	extracellular	cell communication; regulation of biological process; response to stimulus; coagulation; cell organization and biogenesis	Pf00147; Pf08702	1.28909	1.29064	1.14953	1.0012	0.845074	0.891736	0.444061
B4F7C9	Stt3a protein OS=Rattus norvegicus GN=Stt3a PE=2 SV=1 - [B4F7C9_RAT]	80.5449	8.104	14.89	10	4	catalytic activity	cytoplasm; endoplasmic reticulum; membrane	metabolic process	Pf02516	1.47922	1.14661	1.46071	0.775146	0.128598	0.987489	0.95916
Q0VGK3	Glycerate kinase OS=Rattus norvegicus GN=Glyctk PE=2 SV=1 - [GLCTK_RAT]	55.153	6.27783	14.91	5	1	nucleotide binding; catalytic activity	cytoplasm; mitochondrion; Golgi	metabolic process	Pf05161	0.466693	0.257122	0.375259	0.550944	0.000118866	0.804081	0.1125
Q6DHT8	Ferritin OS=Danio rerio GN=zgc:92066 PE=2 SV=1 - [Q6DHT8_DANRE]	20.2789	5.45264	14.94	3	17	metal ion binding; catalytic activity		transport; cellular homeostasis; metabolic process	Pf00210	1.2625	1.10848	1.37691	0.878	0.502988	1.09062	0.338986
A8KBX4	Zgc:101710 protein OS=Danio rerio GN=ech1 PE=2 SV=1 - [A8KBX4_DANRE]	33.716	7.59131	14.94	3	4	catalytic activity		metabolic process	Pf00378	0.553724	0.625383	0.64023	1.12941	0.364702	1.15623	0.136665
Q6DGA6	Allantoicase OS=Danio rerio GN=allc PE=2 SV=1 - [ALLC_DANRE]	44.116	7.59131	14.94	5	1	catalytic activity		metabolic process	Pf03561	0.975217	1.0912	1.05115	1.11893	0.394538	1.07787	0.395882
F1LSW7	60S ribosomal protein L14 OS=Rattus norvegicus GN=Rpl14 PE=2 SV=1 - [F1LSW7_RAT]	23.31	11.1069	14.95	2	4	structural molecule activity	cytoplasm; ribosome	metabolic process	Pf01929	0.697143	0.67305	0.615794	0.965441	0.982271	0.883311	0.400495
B0V1I0	Uncharacterized protein OS=Danio rerio GN=snrpd3 PE=4 SV=1 - [B0V1I0_DANRE]	13.8673	10.3159	14.96	2	4				Pf01423	0.448006	0.432113	0.497493	0.964525	0.977108	1.11046	0.262541
Q66HA8	Heat shock protein 105 kDa OS=Rattus norvegicus GN=Hsph1 PE=1 SV=1 - [HS105_RAT]	96.3574	5.5542	15.03	8	3	nucleotide binding; protein binding	nucleus; organelle lumen; cytoplasm; cytoskeleton	response to stimulus; metabolic process	Pf00012	0.660855	0.62431	0.686707	0.9447	0.864729	1.03912	0.606214
Q498D5	Regulator of microtubule dynamics protein 2 OS=Rattus norvegicus GN=Rmdn2 PE=2 SV=1 - [RMD2_RAT]	47.1874	7.10791	15.05	6	1	protein binding	cytoskeleton; cytoplasm; mitochondrion; membrane			0.33439	0.374239	0.406886	1.11917	0.393842	1.2168	0.0507588
Q4FZY0	EF-hand domain-containing protein D2 OS=Rattus norvegicus GN=Efhd2 PE=1 SV=1 - [EFHD2_RAT]	26.7425	5.07178	15.06	3	5	metal ion binding	membrane			1.67439	1.48151	1.65162	0.884806	0.537151	0.9864	0.967173
B8JI08	Uncharacterized protein OS=Danio rerio GN=ogdha PE=4 SV=1 - [B8JI08_DANRE]	115.596	6.94678	15.07	8	6	catalytic activity	membrane	metabolic process	Pf00676; Pf02779	1.22102	1.37002	1.36186	1.12203	0.385547	1.11535	0.245885
P60892	Ribose-phosphate pyrophosphokinase 1 OS=Rattus norvegicus GN=Prps1 PE=1 SV=2 - [PRPS1_RAT]	34.8119	6.97607	15.09	3	8	nucleotide binding; metal ion binding; catalytic activity; protein binding		metabolic process; development	Pf00156	0.7687	0.568981	0.706664	0.740185	0.0665876	0.919297	0.600542
B0BN63	LOC681996 protein OS=Rattus norvegicus GN=LOC681996 PE=2 SV=1 - [B0BN63_RAT]	38.0802	5.52881	15.09	3	1	enzyme regulator activity; protein binding		response to stimulus; metabolic process; regulation of biological process	Pf08327; Pf09229	0.45133	0.412416	0.41387	0.91378	0.691114	0.917	0.586797
Q5EEY4	GTP-binding protein G-alpha-i2 splice variant a (Fragment) OS=Rattus norvegicus GN=Gnai2 PE=2 SV=1 - [Q5EEY4_RAT]	35.4755	5.31299	15.11	3	28	nucleotide binding; protein binding; catalytic activity; signal transducer activity; metal ion binding	nucleus; cytoplasm; cytoskeleton; cytosol; membrane	cell communication; metabolic process; regulation of biological process; response to stimulus; cell proliferation; cell division; transport	Pf00025; Pf00503	1.32164	1.10552	1.4268	0.836472	0.31717	1.07957	0.387939
Q1JPX9	Zgc:136493 OS=Danio rerio GN=zgc:136493 PE=2 SV=1 - [Q1JPX9_DANRE]	35.9445	7.25439	15.12	4	3	nucleotide binding; catalytic activity		metabolic process	Pf00389; Pf02826	1.24595	1.2066	1.2707	0.968418	0.999026	1.01986	0.730025
P84817	Mitochondrial fission 1 protein OS=Rattus norvegicus GN=Fis1 PE=1 SV=1 - [FIS1_RAT]	16.984	8.52881	15.13	2	1	protein binding	cytoplasm; mitochondrion; membrane	cell organization and biogenesis; metabolic process; cell communication; cell death; regulation of biological process; response to stimulus; cellular homeostasis		0.279643	0.259266	0.243004	0.927134	0.765414	0.86898	0.331728
D3ZBH3	Mitogen-activated protein kinase 14 OS=Rattus norvegicus GN=Mapk14 PE=2 SV=1 - [D3ZBH3_RAT]	29.5073	7.89893	15.18	2	63	nucleotide binding; catalytic activity; signal transducer activity		cell communication; regulation of biological process; response to stimulus; metabolic process	Pf00069; Pf01636; Pf07714	1.54548	1.38831	1.5642	0.898303	0.607349	1.01211	0.782851
F1QBQ6	Uncharacterized protein OS=Danio rerio GN=zgc:56585 PE=3 SV=1 - [F1QBQ6_DANRE]	29.079	5.26221	15.19	4	3	nucleotide binding; catalytic activity		metabolic process	Pf00106; Pf08659	1.11323	0.992556	1.23289	0.891604	0.57213	1.10749	0.273072
Q6P3G9	Thioredoxin domain containing 4 (Endoplasmic reticulum) OS=Danio rerio GN=erp44 PE=2 SV=1 - [Q6P3G9_DANRE]	46.9575	5.33838	15.2	2	2	metal ion binding		cellular homeostasis; regulation of biological process	Pf00085; Pf01216; Pf07449	0.629054	0.731871	0.840338	1.16345	0.279417	1.33587	0.00504663
B0S784	Uncharacterized protein OS=Danio rerio GN=zgc:101744 PE=4 SV=1 - [B0S784_DANRE]	20.9197	7.07861	15.22	2	2				Pf03134	1.15842	0.741067	0.782058	0.63972	0.00466322	0.675105	0.00292535
A9JT04	Cbsa protein OS=Danio rerio GN=cbsa PE=2 SV=1 - [A9JT04_DANRE]	63.1105	7.35693	15.24	2	3	catalytic activity; protein binding	cytoplasm	metabolic process	Pf00291; Pf00571	1.3367	1.44175	1.33343	1.07859	0.525602	0.997557	0.885802
Q6NWE3	Cth protein OS=Danio rerio GN=cth PE=2 SV=1 - [Q6NWE3_DANRE]	43.8501	7.03467	15.25	4	6	catalytic activity		metabolic process	Pf00155; Pf01041; Pf01053; Pf06838	1.17788	1.3752	1.30572	1.16752	0.270347	1.10853	0.26934
F1R319	Uncharacterized protein OS=Danio rerio GN=slc25a11 PE=2 SV=1 - [F1R319_DANRE]	33.8466	9.84717	15.26	2	2		membrane	transport	Pf00153	0.914843	0.998167	0.912087	1.09108	0.482255	0.996987	0.889911
F1M847	Uncharacterized protein (Fragment) OS=Rattus norvegicus GN=Srl PE=4 SV=1 - [F1M847_RAT]	52.181	6.48096	15.27	6	9	catalytic activity; nucleotide binding	membrane	metabolic process	Pf00350; Pf01926	0.569687	0.791295	0.831505	1.389	0.0333993	1.45958	0.000305171
O35987	NSFL1 cofactor p47 OS=Rattus norvegicus GN=Nsfl1c PE=1 SV=1 - [NSF1C_RAT]	40.6554	5.14795	15.41	3	3	protein binding	nucleus; chromosome; cytoplasm; Golgi; cytosol	cell organization and biogenesis	Pf00789; Pf08059	0.627721	0.748598	0.485049	1.19257	0.219635	0.772714	0.0570331
Q6DG23	Zgc:92030 OS=Danio rerio GN=zgc:92030 PE=2 SV=1 - [Q6DG23_DANRE]	39.0741	7.18115	15.41	5	7	catalytic activity		metabolic process	Pf00378; Pf00887; Pf01936	1.09681	1.20374	1.05099	1.09749	0.460961	0.958225	0.845975
F1RCK7	Uncharacterized protein OS=Danio rerio GN=rbks PE=3 SV=1 - [F1RCK7_DANRE]	33.0334	5.64307	15.43	2	2	catalytic activity		metabolic process	Pf00294; Pf08543	1.07924	0.934871	1.06636	0.866232	0.44616	0.988071	0.95488
F1QAJ7	Uncharacterized protein OS=Danio rerio GN=slc25a3b PE=2 SV=1 - [F1QAJ7_DANRE]	39.3522	8.88037	15.45	2	8		membrane	transport	Pf00153	1.15891	0.808031	0.90455	0.697234	0.0249483	0.780518	0.0682652
Q5FVQ4	Malectin OS=Rattus norvegicus GN=Mlec PE=2 SV=1 - [MLEC_RAT]	32.3978	5.5542	15.46	4	2		cytoplasm; endoplasmic reticulum; membrane	metabolic process	Pf11721	0.989547	1.18553	1.02005	1.19806	0.20962	1.03083	0.658128
Q63041	Alpha-1-macroglobulin OS=Rattus norvegicus GN=A1m PE=1 SV=1 - [A1M_RAT]	167.019	6.90283	15.47	20	1	enzyme regulator activity; protein binding	extracellular	metabolic process; regulation of biological process	Pf00207; Pf01835; Pf07677; Pf07678; Pf07703; Pf10569; Pf11974	0.653558	0.849932	0.718093	1.30047	0.082101	1.09874	0.305938
D5JG51	Eukaryotic initiation factor-2A (Fragment) OS=Dugesia japonica GN=eIF2A PE=2 SV=1 - [D5JG51_DUGJA]	22.9569	5.31299	15.5	3	1	RNA binding	cytoplasm	metabolic process	Pf07541	1.89133	1.5656	1.86155	0.827778	0.283918	0.984256	0.982978
Q6NWH7	Ddx5 protein OS=Danio rerio GN=ddx5 PE=2 SV=1 - [Q6NWH7_DANRE]	56.578	9.15869	15.52	2	5	nucleotide binding; catalytic activity			Pf00270; Pf00271	1.03362	1.06685	1.158	1.03215	0.707611	1.12034	0.229711
O55096	Dipeptidyl peptidase 3 OS=Rattus norvegicus GN=Dpp3 PE=1 SV=2 - [DPP3_RAT]	82.9869	5.22412	15.58	8	3	catalytic activity; metal ion binding	nucleus; organelle lumen; cytoplasm; membrane	metabolic process	Pf03571	0.369514	0.259797	0.197463	0.703077	0.0288686	0.534386	1.35305e-06
A8WGP7	UDP-glucose 6-dehydrogenase OS=Danio rerio GN=ugdh PE=2 SV=1 - [A8WGP7_DANRE]	54.543	6.771	15.62	4	3	nucleotide binding; catalytic activity	cytoplasm	development; metabolic process	Pf00984; Pf01210; Pf03435; Pf03720; Pf03721	0.817954	0.786098	0.858357	0.961055	0.957506	1.0494	0.545088
Q6P980	Superoxide dismutase OS=Danio rerio GN=sod2 PE=2 SV=1 - [Q6P980_DANRE]	24.9927	8.1626	15.63	3	2	antioxidant activity; catalytic activity; metal ion binding		metabolic process; response to stimulus	Pf00081; Pf02777	1.05534	1.03306	1.09416	0.978887	0.950251	1.03678	0.620649
D3ZXX9	Protein Eif3m OS=Rattus norvegicus GN=Eif3m PE=2 SV=1 - [D3ZXX9_RAT]	27.8614	7.1665	15.7	3	3	protein binding			Pf01399	0.522186	0.456291	0.554205	0.873809	0.482411	1.06132	0.478915
A4UY08	DEAD box RNA helicase Me31B OS=Dugesia japonica GN=Djcbc-1 PE=2 SV=1 - [A4UY08_DUGJA]	57.3786	8.06006	15.71	6	1	nucleotide binding; catalytic activity			Pf00270; Pf00271	1.40498	1.46962	1.46872	1.04601	0.650017	1.04537	0.568588
Q6AYD3	Proliferation-associated 2G4 OS=Rattus norvegicus GN=Pa2g4 PE=2 SV=1 - [Q6AYD3_RAT]	43.6292	6.85889	15.74	5	4	DNA binding; protein binding	nucleus; organelle lumen; cytoplasm	metabolic process; regulation of biological process	Pf00557	0.967359	1.054	1.02205	1.08957	0.487372	1.05654	0.504825
Q6NYG8	Dihydropyrimidine dehydrogenase [NADP(+)] OS=Danio rerio GN=dpyd PE=2 SV=1 - [DPYD_DANRE]	110.932	7.23975	15.75	9	4	nucleotide binding; catalytic activity; metal ion binding	cytoplasm	metabolic process	Pf01180; Pf01207; Pf07992; Pf12838	1.02375	1.10684	1.104	1.08117	0.516451	1.07839	0.393407
Q9DGK4	Translationally-controlled tumor protein homolog OS=Danio rerio GN=tpt1 PE=2 SV=1 - [TCTP_DANRE]	19.0123	4.66553	15.79	2	4		cytoplasm		Pf00838	0.975545	1.05854	0.995138	1.08508	0.502779	1.02008	0.728547
Q71N41	Guanidinoacetate N-methyltransferase OS=Danio rerio GN=gamt PE=2 SV=2 - [GAMT_DANRE]	26.7252	6.31592	15.81	2	1	catalytic activity		metabolic process		0.976848	0.852281	0.820207	0.872481	0.475964	0.839646	0.21374
B5DFC3	Protein Sec23a OS=Rattus norvegicus GN=Sec23a PE=2 SV=1 - [B5DFC3_RAT]	86.1064	7.07861	15.82	4	2	metal ion binding	cytoplasm; Golgi; membrane	transport	Pf00626; Pf04810; Pf04811; Pf04815; Pf08033	1.02521	1.15234	0.915682	1.12401	0.379873	0.893167	0.451681
D3ZF34	Heterogeneous nuclear ribonucleoprotein Q OS=Rattus norvegicus GN=Syncrip PE=2 SV=1 - [D3ZF34_RAT]	62.6333	7.56201	15.84	2	4	nucleotide binding			Pf00076	1.37203	1.28846	1.46478	0.939095	0.832929	1.0676	0.446154
G3V7E4	Glycine C-acetyltransferase (2-amino-3-ketobutyrate-coenzyme A ligase), isoform CRA_b OS=Rattus norvegicus GN=Gcat PE=3 SV=1 - [G3V7E4_RAT]	45.1681	7.6499	15.87	4	2	catalytic activity	cytoplasm; mitochondrion; membrane	metabolic process	Pf00155; Pf00266; Pf00464	0.87499	0.724597	0.730979	0.82812	0.285186	0.835414	0.199326
B3DKJ0	Chaperonin containing TCP1, subunit 7 (Eta) OS=Danio rerio GN=cct7 PE=2 SV=1 - [B3DKJ0_DANRE]	59.6691	7.34229	15.9	2	4	nucleotide binding; protein binding	cytoplasm	metabolic process	Pf00118	1.40929	1.39155	1.2622	0.987417	0.909564	0.895631	0.464937
B0S584	Uncharacterized protein OS=Danio rerio GN=mapre1a PE=4 SV=1 - [B0S584_DANRE]	15.3387	8.55811	15.91	2	14	protein binding			Pf00307	2.14855	1.89722	1.80873	0.883027	0.528136	0.841841	0.221475
G1K2M3	Putative L-aspartate dehydrogenase OS=Danio rerio GN=aspdh PE=4 SV=1 - [G1K2M3_DANRE]	29.7023	7.23975	15.94	3	2	nucleotide binding; catalytic activity		metabolic process	Pf01958; Pf03447; Pf03807	1.05236	1.14743	1.14913	1.09034	0.484746	1.09196	0.333369
Q6PBY8	S-phase kinase-associated protein 1 OS=Danio rerio GN=skp1 PE=2 SV=1 - [Q6PBY8_DANRE]	18.6782	4.53857	15.95	2	2	catalytic activity		metabolic process	Pf01466; Pf03931	1.27768	1.05467	1.11686	0.825461	0.275415	0.874135	0.355661
Q5XI34	Protein Ppp2r1a OS=Rattus norvegicus GN=Ppp2r1a PE=2 SV=1 - [Q5XI34_RAT]	65.2809	5.10986	15.96	3	4	catalytic activity; protein binding	chromosome; cytoplasm; cytosol	cell death; regulation of biological process; metabolic process		1.2394	0.82581	1.29679	0.666298	0.0107178	1.0463	0.563084
F1QF15	Actin-related protein 2-A OS=Danio rerio GN=actr2a PE=2 SV=1 - [F1QF15_DANRE]	44.6651	6.55127	15.99	5	8		membrane		Pf00022	0.977167	1.10415	0.941432	1.12995	0.36322	0.96343	0.879788
B2RZ72	Actin related protein 2/3 complex, subunit 4 (Predicted), isoform CRA_a OS=Rattus norvegicus GN=Arpc4 PE=2 SV=1 - [B2RZ72_RAT]	19.6543	8.42627	16.07	3	3		cytoskeleton	cell organization and biogenesis	Pf05856	1.2793	1.37552	1.40399	1.07521	0.537736	1.09747	0.310972
D4A0W9	Protein Ganab OS=Rattus norvegicus GN=Ganab PE=2 SV=1 - [D4A0W9_RAT]	106.836	6.07471	16.1	14	3	catalytic activity	membrane; cytoplasm; endoplasmic reticulum	metabolic process	Pf01055	0.940963	0.78825	0.903493	0.837705	0.322054	0.960178	0.858655
B6DTP5	DEAD (Asp-Glu-Ala-Asp) box polypeptide 5 (Fragment) OS=Rattus norvegicus GN=Ddx5 PE=2 SV=1 - [B6DTP5_RAT]	69.0687	8.85107	16.12	4	2	nucleotide binding; catalytic activity; protein binding; RNA binding	nucleus; organelle lumen; spliceosomal complex	metabolic process; regulation of biological process; development; cell communication; response to stimulus; reproduction; cell differentiation; cell death	Pf00270; Pf00271; Pf08061	0.945915	0.875052	0.882231	0.925085	0.753924	0.932675	0.682624
Q6NYN8	Eef1g protein (Fragment) OS=Danio rerio GN=eef1g PE=2 SV=1 - [Q6NYN8_DANRE]	50.2222	7.29834	16.14	5	5	RNA binding; protein binding	cytoplasm	metabolic process	Pf00043; Pf00647; Pf02798	1.2613	1.22691	1.2371	0.972741	0.979873	0.980814	0.992642
F1RA50	Uncharacterized protein (Fragment) OS=Danio rerio GN=ctsd PE=2 SV=1 - [F1RA50_DANRE]	42.9125	6.96143	16.16	4	5	catalytic activity		metabolic process	Pf00026; Pf07966	0.987694	1.16286	0.963187	1.17735	0.24943	0.975188	0.956212
D5JG52	Eukaryotic initiation factor-3A (Fragment) OS=Dugesia japonica GN=eIF3A PE=2 SV=1 - [D5JG52_DUGJA]	97.6981	8.104	16.16	11	1	RNA binding; protein binding	membrane	metabolic process	Pf01399	2.07772	1.84807	2.17387	0.889473	0.561078	1.04628	0.563231
F1R3L8	Uncharacterized protein OS=Danio rerio GN=zgc:64106 PE=4 SV=1 - [F1R3L8_DANRE]	34.0521	9.18799	16.18	4	3	nucleotide binding; catalytic activity		metabolic process	Pf00106; Pf08659	1.03388	0.949818	1.03958	0.918689	0.718252	1.00551	0.829046
F1LR38	ATP-binding cassette sub-family D member 3 (Fragment) OS=Rattus norvegicus GN=Abcd3 PE=2 SV=1 - [F1LR38_RAT]	71.262	9.02686	16.24	9	3	nucleotide binding; catalytic activity; protein binding	cytoplasm; mitochondrion; membrane	metabolic process; transport; cell organization and biogenesis	Pf00005; Pf06472	0.844484	0.852099	0.843789	1.00902	0.809337	0.999177	0.87414
E7FD66	Uncharacterized protein OS=Danio rerio GN=aass PE=4 SV=1 - [E7FD66_DANRE]	104.074	6.65381	16.26	9	2	nucleotide binding; catalytic activity		metabolic process	Pf01262; Pf03435; Pf05222	1.17735	1.24042	1.08097	1.05357	0.619727	0.918142	0.593618
Q6NVI6	Chaperonin containing TCP1, subunit 5 (Epsilon) OS=Danio rerio GN=cct5 PE=2 SV=1 - [Q6NVI6_DANRE]	59.3569	5.56689	16.27	3	5	nucleotide binding; protein binding	cytoplasm	metabolic process	Pf00118	1.95853	1.59729	1.76373	0.815555	0.240783	0.900535	0.491847
E9QDY4	Uncharacterized protein OS=Danio rerio GN=zgc:92533 PE=2 SV=1 - [E9QDY4_DANRE]	91.9707	5.32568	16.35	2	38	structural molecule activity	cytoskeleton		Pf00038	0.813948	0.973399	0.870691	1.1959	0.213512	1.06971	0.435487
P23514	Coatomer subunit beta OS=Rattus norvegicus GN=Copb1 PE=1 SV=1 - [COPB_RAT]	106.943	5.96045	16.37	14	2	structural molecule activity; protein binding	cytoplasm; Golgi; membrane; endoplasmic reticulum	transport	Pf01602; Pf07718	1.14617	1.16659	1.09965	1.01782	0.769862	0.959413	0.853684
Q803F5	Adipocyte plasma membrane-associated protein OS=Danio rerio GN=apmap PE=2 SV=1 - [APMAP_DANRE]	46.714	7.26904	16.39	4	1	catalytic activity	membrane	metabolic process	Pf03088; Pf08450	1.42387	1.37224	1.2715	0.963737	0.972661	0.892984	0.450704
F1LR13	Atlastin-3 OS=Rattus norvegicus GN=Atl3 PE=2 SV=1 - [F1LR13_RAT]	60.3013	5.63037	16.42	7	6	catalytic activity; nucleotide binding	membrane	metabolic process	Pf02263	0.864526	0.901572	1.00117	1.04285	0.662905	1.15806	0.132895
Q3T1K5	F-actin-capping protein subunit alpha-2 OS=Rattus norvegicus GN=Capza2 PE=1 SV=1 - [CAZA2_RAT]	32.9466	5.84619	16.43	2	3	protein binding	cytoplasm; cytoskeleton; membrane	cell organization and biogenesis; regulation of biological process	Pf01267	1.20983	1.1569	1.38671	0.956248	0.930289	1.1462	0.158848
P52296	Importin subunit beta-1 OS=Rattus norvegicus GN=Kpnb1 PE=1 SV=1 - [IMB1_RAT]	97.062	4.76709	16.46	4	3	protein binding; transporter activity	nucleus; cytoplasm; membrane	transport	Pf02985; Pf03810	0.917557	0.636555	0.896946	0.69375	0.0228241	0.977538	0.971447
P05544	Serine protease inhibitor A3L OS=Rattus norvegicus GN=Serpina3l PE=1 SV=3 - [SPA3L_RAT]	46.2481	5.66846	16.46	5	5	enzyme regulator activity	extracellular	metabolic process; regulation of biological process	Pf00079	0.488051	0.426978	0.459389	0.874864	0.487555	0.941271	0.736853
H7BWW6	Ribosomal protein L19 OS=Danio rerio GN=rpl19 PE=3 SV=1 - [H7BWW6_DANRE]	23.2201	11.4585	16.49	4	5	structural molecule activity	cytoplasm; ribosome	metabolic process	Pf01280	0.985144	1.06573	0.725575	1.0818	0.514217	0.736516	0.0223674
P29117	Peptidyl-prolyl cis-trans isomerase F, mitochondrial OS=Rattus norvegicus GN=Ppif PE=1 SV=2 - [PPIF_RAT]	21.7961	9.14404	16.5	3	2	catalytic activity; protein binding	cytoplasm; mitochondrion; membrane; organelle lumen	metabolic process; cell death; cell organization and biogenesis; regulation of biological process; transport	Pf00160	0.762426	0.49677	0.432766	0.651565	0.00684529	0.567617	1.3447e-05
Q6PBI0	Succinate-CoA ligase, ADP-forming, beta subunit OS=Danio rerio GN=sucla2 PE=2 SV=1 - [Q6PBI0_DANRE]	49.9989	6.91748	16.52	5	2	catalytic activity; nucleotide binding		metabolic process	Pf00549; Pf08442	0.971738	0.95363	0.927208	0.981366	0.938372	0.954175	0.819728
E9QB42	Acidic leucine-rich nuclear phosphoprotein 32 family member A OS=Danio rerio GN=anp32a PE=2 SV=1 - [E9QB42_DANRE]	24.6577	4.1958	16.59	2	4	protein binding			Pf12799	1.30371	0.698768	0.836679	0.535984	5.43176e-05	0.641768	0.000731078
G3V9J1	Protein LOC297568 OS=Rattus norvegicus GN=LOC297568 PE=4 SV=1 - [G3V9J1_RAT]	163.618	6.01123	16.59	8	10	enzyme regulator activity	extracellular	metabolic process; regulation of biological process	Pf00207; Pf01835; Pf07677; Pf07678; Pf07703; Pf10569; Pf11974	0.568716	0.565114	0.460608	0.993667	0.880118	0.809908	0.126088
D3Z8I7	Glutathione S-transferase theta-1 OS=Rattus norvegicus GN=Gstt1 PE=4 SV=1 - [D3Z8I7_RAT]	23.3661	9.08545	16.67	2	1	protein binding; catalytic activity			Pf02798	0.865803	0.915069	0.809104	1.0569	0.606641	0.934512	0.69413
Q3B7P9	Ribosomal protein L7 OS=Danio rerio GN=rpl7 PE=2 SV=1 - [Q3B7P9_DANRE]	28.4138	10.7993	16.67	2	4	structural molecule activity	cytoplasm; ribosome	metabolic process; regulation of biological process	Pf00327; Pf08079	0.629632	0.50055	0.602173	0.794988	0.177899	0.956389	0.834067
Q6DHD5	Uncharacterized protein OS=Danio rerio GN=akr7a3 PE=2 SV=1 - [Q6DHD5_DANRE]	36.457	6.7124	16.72	4	1				Pf00248	0.956421	0.860763	0.995878	0.899983	0.616292	1.04126	0.593206
A0EXC5	SULT2 ST2 OS=Danio rerio GN=sult2st2 PE=2 SV=1 - [A0EXC5_DANRE]	33.6568	6.15088	16.72	5	5	catalytic activity			Pf00685	0.873527	0.866801	0.811009	0.992301	0.886523	0.928431	0.656244
P05982	NAD(P)H dehydrogenase [quinone] 1 OS=Rattus norvegicus GN=Nqo1 PE=1 SV=4 - [NQO1_RAT]	30.927	8.42627	16.79	5	1	catalytic activity; antioxidant activity	cytoplasm; cytosol	metabolic process; response to stimulus; regulation of biological process; cell death	Pf02525; Pf03358	1.08533	1.14561	1.19998	1.05554	0.611978	1.10563	0.279829
Q6AXI7	Acyl-Coenzyme A dehydrogenase, C-2 to C-3 short chain OS=Danio rerio GN=acads PE=2 SV=1 - [Q6AXI7_DANRE]	43.5204	7.94287	16.79	5	4	catalytic activity		metabolic process	Pf00441; Pf02770; Pf02771; Pf08028	1.20705	1.25804	1.18361	1.04224	0.66541	0.980581	0.991137
P17475	Alpha-1-antiproteinase OS=Rattus norvegicus GN=Serpina1 PE=1 SV=2 - [A1AT_RAT]	46.1065	6.07471	16.79	7	1	protein binding; enzyme regulator activity	extracellular	response to stimulus; defense response; metabolic process; regulation of biological process	Pf00079	0.775671	0.695512	0.726949	0.896658	0.598635	0.937187	0.710967
Q6PBW6	Chaperonin containing TCP1, subunit 2 (Beta) OS=Danio rerio GN=cct2 PE=2 SV=1 - [Q6PBW6_DANRE]	57.725	6.31592	16.82	2	5	nucleotide binding; protein binding	cytoplasm	metabolic process; transport	Pf00118	1.40805	1.0931	0.922831	0.776324	0.131224	0.655399	0.00132392
Q6TNV4	Chaperonin containing TCP1, subunit 8 (Theta) OS=Danio rerio GN=cct8 PE=2 SV=1 - [Q6TNV4_DANRE]	59.2628	5.35107	16.85	3	2	nucleotide binding; protein binding	cytoplasm	metabolic process; response to stimulus	Pf00118	1.67439	1.51243	1.8106	0.903273	0.633913	1.08134	0.379752
D4P380	Small ribonucleoprotein SmB OS=Schmidtea mediterranea PE=2 SV=1 - [D4P380_SCHMD]	18.6766	9.59814	16.95	4	1				Pf01423	2.16571	1.65569	2.12207	0.764503	0.106536	0.97985	0.98641
Q6PFU0	Ndrg1 protein OS=Danio rerio GN=ndrg1a PE=2 SV=1 - [Q6PFU0_DANRE]	38.5318	6.97607	16.95	4	3				Pf00561; Pf03096; Pf12697	1.52875	1.54651	1.49029	1.01162	0.797585	0.974839	0.953948
P02767	Transthyretin OS=Rattus norvegicus GN=Ttr PE=1 SV=1 - [TTHY_RAT]	15.7099	6.16357	17.01	2	1	protein binding	extracellular	transport; metabolic process	Pf00576	0.495959	0.468847	0.424321	0.945334	0.86833	0.855557	0.273837
B2RZ78	Vacuolar protein sorting-associated protein 29 OS=Rattus norvegicus GN=Vps29 PE=1 SV=2 - [VPS29_RAT]	20.4556	6.78564	17.03	3	3	catalytic activity; metal ion binding	cytoplasm; endosome; membrane	transport	Pf00149; Pf12850	0.935266	0.965623	0.818887	1.03246	0.70632	0.875566	0.362465
Q3KRF2	High density lipoprotein binding protein OS=Rattus norvegicus GN=Hdlbp PE=2 SV=1 - [Q3KRF2_RAT]	141.608	6.94678	17.03	13	4	RNA binding	nucleus; cytoplasm; extracellular	transport; metabolic process	Pf00013	0.819814	0.744132	0.782082	0.907685	0.65777	0.953975	0.818432
F1R4I6	Uncharacterized protein (Fragment) OS=Danio rerio PE=4 SV=1 - [F1R4I6_DANRE]	18.5936	8.33838	17.07	2	1	catalytic activity	cytoplasm	metabolic process		0.91154	0.976436	0.948847	1.07119	0.552421	1.04093	0.595197
F1QA91	Uncharacterized protein OS=Danio rerio GN=sfxn1 PE=4 SV=1 - [F1QA91_DANRE]	35.4863	9.29053	17.08	4	3	transporter activity	membrane	transport	Pf03820	1.41874	1.44511	1.35874	1.01858	0.766491	0.957705	0.842599
B0R1E9	Uncharacterized protein OS=Danio rerio GN=zgc:92357 PE=4 SV=1 - [B0R1E9_DANRE]	17.3019	9.40771	17.11	2	2	catalytic activity			Pf01124	1.32373	1.49396	1.38914	1.1286	0.366958	1.04941	0.544991
O70127	Bile salt export pump OS=Rattus norvegicus GN=Abcb11 PE=1 SV=1 - [ABCBB_RAT]	146.165	7.40088	17.11	13	3	nucleotide binding; protein binding; transporter activity; catalytic activity	cytoplasm; Golgi; membrane	metabolic process; transport; response to stimulus	Pf00005; Pf00664	0.971631	0.914329	0.868527	0.941026	0.843876	0.893886	0.45553
A5PMV7	Uncharacterized protein OS=Danio rerio GN=ppp2r1a PE=4 SV=1 - [A5PMV7_DANRE]	65.3809	5.021	17.15	3	7	protein binding				1.26932	1.23468	1.21929	0.972711	0.980022	0.960587	0.861311
Q6PHJ4	Hnrpa0 protein (Fragment) OS=Danio rerio GN=hnrnpa0b PE=2 SV=1 - [Q6PHJ4_DANRE]	31.9694	7.92822	17.16	3	6	nucleotide binding			Pf00076	1.20207	1.32903	1.19031	1.10562	0.434922	0.990216	0.939153
D3ZU80	Ribosomal protein L15 OS=Rattus norvegicus GN=RGD1560501 PE=3 SV=1 - [D3ZU80_RAT]	24.1611	11.5757	17.16	4	4	structural molecule activity	cytoplasm; ribosome	metabolic process	Pf00827	0.525779	0.384449	0.465014	0.731198	0.0551401	0.884429	0.406145
E7FC32	Uncharacterized protein OS=Danio rerio GN=tubb1 PE=3 SV=1 - [E7FC32_DANRE]	52.5445	4.98291	17.17	2	1	nucleotide binding; catalytic activity; structural molecule activity	cytoplasm; cytoskeleton	metabolic process; cellular component movement; cell organization and biogenesis	Pf00091; Pf03953; Pf10644	1.94878	1.89537	2.14771	0.972592	0.980597	1.10208	0.293095
F4ZGF2	Catechol O-methyltransferase OS=Danio rerio GN=comta PE=2 SV=1 - [F4ZGF2_DANRE]	28.7012	7.82568	17.19	3	5	metal ion binding; catalytic activity		metabolic process; cell communication	Pf01596; Pf12847	1.02397	0.951768	0.961601	0.929486	0.778635	0.939089	0.722996
Q5BJ17	Elongation factor Tu OS=Danio rerio GN=tufm PE=2 SV=1 - [Q5BJ17_DANRE]	49.2133	6.91748	17.19	5	1	nucleotide binding; RNA binding; catalytic activity		metabolic process	Pf00009; Pf03143; Pf03144	1.2218	1.1114	1.23972	0.909642	0.668434	1.01467	0.765273
Q5FVR5	Acyl-coenzyme A amino acid N-acyltransferase 2 OS=Rattus norvegicus GN=Acnat2 PE=2 SV=1 - [ACNT2_RAT]	45.9809	8.32373	17.22	6	2	catalytic activity	cytoplasm	metabolic process	Pf04775; Pf08840	0.446893	0.593726	0.413966	1.32856	0.0622164	0.92632	0.643232
Q5XHY5	Threonine--tRNA ligase, cytoplasmic OS=Rattus norvegicus GN=Tars PE=2 SV=1 - [SYTC_RAT]	80.5245	6.94678	17.27	10	7	nucleotide binding; catalytic activity; metal ion binding	cytoplasm; cytoskeleton	metabolic process	Pf00587; Pf02824; Pf03129; Pf07973	1.14588	1.15921	1.24438	1.01163	0.797514	1.08596	0.359048
C9QNV8	4SNc-Tudor domain protein short form OS=Danio rerio GN=snd1 PE=2 SV=1 - [C9QNV8_DANRE]	97.9382	6.99072	17.32	8	5	catalytic activity	cytoplasm	metabolic process; regulation of biological process	Pf00565; Pf00567	1.11362	1.1278	1.0814	1.01273	0.792563	0.971065	0.929437
A4FVH7	Hao1 protein OS=Danio rerio GN=hao1 PE=2 SV=1 - [A4FVH7_DANRE]	40.492	7.6499	17.34	5	4	catalytic activity; nucleotide binding		metabolic process	Pf01070; Pf01645	0.87933	1.01807	0.918743	1.15778	0.292434	1.04482	0.571834
Q803X7	Nucleosome assembly protein 1, like 1 OS=Danio rerio GN=nap1l1 PE=2 SV=1 - [Q803X7_DANRE]	44.4493	4.50049	17.4	2	2		nucleus	cell organization and biogenesis; metabolic process	Pf00956	1.06881	0.877984	0.839864	0.821462	0.261098	0.785797	0.0767725
P08461	Dihydrolipoyllysine-residue acetyltransferase component of pyruvate dehydrogenase complex, mitochondrial OS=Rattus norvegicus GN=Dlat PE=1 SV=3 - [ODP2_RAT]	67.1234	8.52881	17.41	7	1	nucleotide binding; catalytic activity	cytoplasm; mitochondrion; organelle lumen	metabolic process; reproduction; response to stimulus	Pf00198; Pf00364; Pf02817	0.556827	0.48564	0.685643	0.872156	0.474396	1.23134	0.0392354
Q4V916	Farnesyl diphosphate synthase (Farnesyl pyrophosphate synthetase, dimethylallyltranstransferase, geranyltranstransferase) OS=Danio rerio GN=fdps PE=2 SV=1 - [Q4V916_DANRE]	40.7975	5.80811	17.42	6	5	catalytic activity		metabolic process	Pf00348	0.96155	1.14248	1.07285	1.18816	0.227945	1.11575	0.24453
F1Q5P0	Uncharacterized protein OS=Danio rerio GN=si:ch211-270n8.1 PE=4 SV=1 - [F1Q5P0_DANRE]	27.4688	8.646	17.43	3	2				Pf00354	1.03503	0.892446	1.05922	0.862244	0.427596	1.02337	0.706643
B0R023	NEDD8 OS=Danio rerio GN=nedd8l PE=4 SV=1 - [B0R023_DANRE]	9.06287	6.55127	17.5	2	6	protein binding			Pf00240; Pf11976	0.995721	0.847724	0.983634	0.851367	0.378911	0.987861	0.956422
G3V7I0	Peroxiredoxin 3 OS=Rattus norvegicus GN=Prdx3 PE=4 SV=1 - [G3V7I0_RAT]	28.2815	7.54736	17.51	4	2	antioxidant activity; catalytic activity; protein binding; enzyme regulator activity	cytoplasm; mitochondrion; endosome; cytosol	development; response to stimulus; cell organization and biogenesis; cell proliferation; regulation of biological process; cell differentiation; metabolic process; cell death; cellular homeostasis	Pf00578; Pf08534; Pf10417	1.40275	1.38247	1.37115	0.985547	0.918439	0.977475	0.971039
D3ZGW0	Thymidine phosphorylase OS=Rattus norvegicus GN=Tymp PE=2 SV=1 - [D3ZGW0_RAT]	49.1017	6.34131	17.52	6	2	catalytic activity	membrane	metabolic process	Pf00591; Pf02885; Pf07831	1.92006	1.94239	1.73512	1.01163	0.797536	0.903678	0.509444
Q7T368	Pyruvate dehydrogenase (Lipoamide) beta OS=Danio rerio GN=pdhb PE=2 SV=1 - [Q7T368_DANRE]	39.2831	6.11279	17.55	3	2	catalytic activity		metabolic process	Pf02779; Pf02780	0.973402	0.963056	1.05772	0.989372	0.900318	1.08663	0.35614
P15178	Aspartate--tRNA ligase, cytoplasmic OS=Rattus norvegicus GN=Dars PE=2 SV=1 - [SYDC_RAT]	57.0902	6.44287	17.56	5	3	nucleotide binding; catalytic activity	cytoplasm	metabolic process	Pf00152; Pf01336	1.45683	1.37179	1.21981	0.941622	0.847257	0.8373	0.205667
Q3MIE4	Synaptic vesicle membrane protein VAT-1 homolog OS=Rattus norvegicus GN=Vat1 PE=1 SV=1 - [VAT1_RAT]	43.091	6.62451	17.57	6	1	nucleotide binding; metal ion binding; catalytic activity	cytoplasm; mitochondrion; membrane	cell organization and biogenesis; regulation of biological process; metabolic process	Pf00107; Pf08240	0.956198	0.945001	0.75945	0.98829	0.90543	0.79424	0.0920168
P02616	Parvalbumin beta OS=Amphiuma means PE=1 SV=1 - [PRVB_AMPME]	11.7339	4.81787	17.59	2	1	metal ion binding			Pf00036	0.470291	0.767517	0.798054	1.632	0.00207967	1.69694	6.24416e-07
F1QVB1	Uncharacterized protein OS=Danio rerio GN=ptgr1 PE=2 SV=1 - [F1QVB1_DANRE]	35.8391	6.53662	17.63	5	3	nucleotide binding; metal ion binding; catalytic activity		metabolic process	Pf00107	1.04197	1.05878	1.05096	1.01613	0.777372	1.00862	0.80713
Q5XIC0	Enoyl-CoA delta isomerase 2, mitochondrial OS=Rattus norvegicus GN=Eci2 PE=1 SV=1 - [ECI2_RAT]	42.994	8.98291	17.65	4	1	catalytic activity; protein binding	cytoplasm; mitochondrion; organelle lumen	metabolic process	Pf00378; Pf00887; Pf09742	0.723124	0.763375	0.745971	1.05566	0.611485	1.0316	0.653228
F1QJE0	Uncharacterized protein OS=Danio rerio GN=uqcrc2a PE=2 SV=1 - [F1QJE0_DANRE]	49.0272	7.53271	17.65	6	2	catalytic activity; metal ion binding		metabolic process	Pf00675; Pf05193	0.919195	0.955992	0.940752	1.04003	0.674537	1.02345	0.706105
P01026	Complement C3 OS=Rattus norvegicus GN=C3 PE=1 SV=3 - [CO3_RAT]	186.342	6.53662	17.68	23	2	enzyme regulator activity; protein binding	extracellular	defense response; regulation of biological process; response to stimulus; metabolic process; development; coagulation; transport; cell communication; cell organization and biogenesis	Pf00207; Pf01759; Pf01821; Pf01835; Pf07677; Pf07678; Pf07703; Pf10569; Pf11974	0.749656	0.723113	0.777032	0.964592	0.977486	1.03652	0.622256
F1LX65	Protein LOC686567 (Fragment) OS=Rattus norvegicus GN=LOC686567 PE=2 SV=1 - [F1LX65_RAT]	93.6821	5.49072	17.71	4	2		cytoskeleton		Pf00681	1.52423	1.54605	1.25228	1.01431	0.785493	0.821583	0.156761
A7YT77	Qdpra protein OS=Danio rerio GN=qdpra PE=2 SV=1 - [A7YT77_DANRE]	24.6183	7.07861	17.72	3	1	nucleotide binding; catalytic activity		metabolic process	Pf01370	0.852304	0.827696	0.8099	0.971127	0.987691	0.950248	0.794363
D3ZRJ1	Cytochrome P450 4A2 OS=Rattus norvegicus GN=Cyp4a2 PE=2 SV=1 - [D3ZRJ1_RAT]	58.428	9.0415	17.75	9	9	catalytic activity; metal ion binding	membrane	metabolic process	Pf00067	0.546591	0.479879	0.487665	0.877948	0.502733	0.892193	0.446486
F1R3F7	Uncharacterized protein OS=Danio rerio GN=si:ch1073-329n19.2 PE=4 SV=1 - [F1R3F7_DANRE]	30.0108	4.77979	17.78	3	2		cytoplasm; mitochondrion; organelle lumen		Pf02330	0.847569	0.726175	0.981637	0.856774	0.40275	1.15818	0.132659
F1QII8	Uncharacterized protein OS=Danio rerio GN=zgc:110726 PE=4 SV=1 - [F1QII8_DANRE]	25.3947	5.0083	17.81	3	3	RNA binding	nucleus; cytoplasm	metabolic process; regulation of biological process	Pf03399; Pf10075	0.997505	1.26796	0.833611	1.27113	0.108721	0.835696	0.200265
G3V6P2	Dihydrolipoamide S-succinyltransferase (E2 component of 2-oxo-glutarate complex), isoform CRA_a OS=Rattus norvegicus GN=Dlst PE=3 SV=1 - [G3V6P2_RAT]	48.8684	8.70459	17.84	4	5	catalytic activity; protein binding	nucleus; cytoplasm; mitochondrion; membrane	metabolic process	Pf00198; Pf00364	0.673104	0.717484	0.610919	1.06593	0.572012	0.907615	0.53185
F1LZM7	Hydroxysteroid dehydrogenase-like protein 2 (Fragment) OS=Rattus norvegicus GN=Hsdl2 PE=2 SV=1 - [F1LZM7_RAT]	53.8599	5.93506	17.86	5	3	nucleotide binding; catalytic activity		metabolic process	Pf00106; Pf02036	0.666828	1.37849	1.09061	2.06723	7.6916e-06	1.63551	3.35746e-06
Q5XI22	Acetyl-CoA acetyltransferase, cytosolic OS=Rattus norvegicus GN=Acat2 PE=1 SV=1 - [THIC_RAT]	41.0821	7.29834	17.88	5	4	catalytic activity	cytoplasm; cytosol	development; metabolic process; cell communication; response to stimulus	Pf00108; Pf00109; Pf02803; Pf08541	0.722993	0.622459	0.617719	0.860947	0.421643	0.854391	0.269117
I6L9G6	Protein Tardbp OS=Rattus norvegicus GN=Tardbp PE=2 SV=1 - [I6L9G6_RAT]	32.1271	6.99072	17.89	5	7	nucleotide binding; DNA binding; RNA binding	nucleus; chromosome; organelle lumen; cytoplasm	metabolic process; response to stimulus; regulation of biological process; reproduction	Pf00076	0.681832	0.761953	0.682224	1.11751	0.39872	1.00057	0.864119
A3KPR3	Uncharacterized protein OS=Danio rerio GN=histh1l PE=4 SV=1 - [A3KPR3_DANRE]	20.6598	11.2388	17.91	3	7	DNA binding	chromosome; nucleus	cell organization and biogenesis; metabolic process	Pf00538	1.84983	1.4499	1.84722	0.783805	0.148774	0.99859	0.878358
Q9WVJ4	Synaptojanin-2-binding protein OS=Rattus norvegicus GN=Synj2bp PE=1 SV=2 - [SYJ2B_RAT]	15.8153	6.80029	17.93	2	2	protein binding	cytoplasm; mitochondrion; membrane	transport; cell communication; regulation of biological process; response to stimulus; cell organization and biogenesis	Pf00595	0.938804	1.17459	0.963579	1.25116	0.130912	1.02639	0.686804
D4AEH9	Amylo-1, 6-glucosidase, 4-alpha-glucanotransferase (Glycogen debranching enzyme, glycogen storage disease type III) (Predicted), isoform CRA_a OS=Rattus norvegicus GN=Agl PE=4 SV=1 - [D4AEH9_RAT]	174.22	6.7417	17.95	22	2	catalytic activity; protein binding	nucleus; organelle lumen; cytoplasm; endoplasmic reticulum	metabolic process; response to stimulus	Pf00128; Pf06202	0.777307	0.680983	0.654474	0.87608	0.493516	0.841976	0.221958
Q568I5	Peroxiredoxin 3 OS=Danio rerio GN=prdx3 PE=2 SV=1 - [Q568I5_DANRE]	26.9041	8.96826	18	4	4	antioxidant activity; catalytic activity		metabolic process	Pf00578; Pf08534; Pf10417	0.968506	0.963546	0.975131	0.994879	0.874446	1.00684	0.81964
Q5XI60	Receptor expression-enhancing protein 6 OS=Rattus norvegicus GN=Reep6 PE=2 SV=1 - [REEP6_RAT]	23.2983	8.25049	18.01	3	1		cytoplasm; membrane		Pf03134	0.635839	0.79226	0.551915	1.24601	0.137233	0.86801	0.327329
F8WFV1	Protein disulfide-isomerase A5 (Fragment) OS=Rattus norvegicus GN=Pdia5 PE=4 SV=1 - [F8WFV1_RAT]	59.2239	7.38623	18.02	9	2	catalytic activity		metabolic process; cellular homeostasis; regulation of biological process	Pf00085	0.958621	0.797904	0.99128	0.832346	0.301124	1.03407	0.637566
F1QFW9	Uncharacterized protein OS=Danio rerio GN=cyp2k22 PE=2 SV=1 - [F1QFW9_DANRE]	56.8588	8.73389	18.09	9	9	catalytic activity; metal ion binding	membrane	metabolic process	Pf00067	0.994232	0.948484	1.00017	0.953987	0.917462	1.00597	0.825773
P19234	NADH dehydrogenase [ubiquinone] flavoprotein 2, mitochondrial OS=Rattus norvegicus GN=Ndufv2 PE=1 SV=2 - [NDUV2_RAT]	27.3609	6.68311	18.15	4	1	catalytic activity; metal ion binding; nucleotide binding	cytoplasm; mitochondrion; membrane	metabolic process; transport; development	Pf01257	0.95392	0.847639	0.893531	0.888585	0.556499	0.936694	0.707855
D4AC36	Protein Eif3f OS=Rattus norvegicus GN=Eif3f PE=4 SV=1 - [D4AC36_RAT]	37.9733	5.45264	18.28	5	1	RNA binding; protein binding	cytoplasm	metabolic process	Pf01398	0.787172	0.764453	0.765325	0.971139	0.987632	0.972247	0.937117
P97612	Fatty-acid amide hydrolase 1 OS=Rattus norvegicus GN=Faah PE=1 SV=1 - [FAAH1_RAT]	63.3156	8.14795	18.31	8	2	catalytic activity; protein binding	cytoplasm; Golgi; membrane; endoplasmic reticulum	metabolic process	Pf01425	0.808434	0.79644	0.652212	0.985164	0.920257	0.806759	0.118606
D3ZR06	Keratin, type I cytoskeletal 10 OS=Rattus norvegicus GN=Krt10 PE=2 SV=1 - [D3ZR06_RAT]	49.657	5.10986	18.32	6	10	structural molecule activity	cytoskeleton		Pf00038	1.57893	1.59277	1.72242	1.00876	0.810488	1.09088	0.337911
Q9WU49	Calcium-regulated heat stable protein 1 OS=Rattus norvegicus GN=Carhsp1 PE=1 SV=1 - [CHSP1_RAT]	15.896	8.20654	18.37	2	1	DNA binding; RNA binding	cytoplasm; cytosol	metabolic process; regulation of biological process; cell communication; response to stimulus	Pf00313	0.492085	0.477069	0.603801	0.969485	0.995657	1.22703	0.042381
Q6NWD6	Si:dkey-16k6.1 protein (Fragment) OS=Danio rerio GN=capza1b PE=2 SV=1 - [Q6NWD6_DANRE]	32.36	5.43994	18.37	2	4	protein binding	cytoskeleton	cell organization and biogenesis	Pf01267	1.2155	1.29678	1.16822	1.06687	0.568508	0.9611	0.864643
G3V936	Citrate synthase OS=Rattus norvegicus GN=Cs PE=3 SV=1 - [G3V936_RAT]	51.7975	8.41162	18.45	5	3	catalytic activity		metabolic process	Pf00285	2.16486	1.63353	2.41176	0.754566	0.0885305	1.11405	0.250226
Q6AY09	Heterogeneous nuclear ribonucleoprotein H2 OS=Rattus norvegicus GN=Hnrnph2 PE=1 SV=1 - [HNRH2_RAT]	49.2623	6.30322	18.49	4	7	nucleotide binding; RNA binding	nucleus; organelle lumen; cytoplasm; cytoskeleton		Pf00076; Pf08080	0.613781	0.545728	0.592082	0.889125	0.55928	0.964647	0.8877
E9QD12	Uncharacterized protein OS=Danio rerio GN=dcxr PE=2 SV=1 - [E9QD12_DANRE]	21.7512	8.47021	18.54	3	2	nucleotide binding; catalytic activity		metabolic process	Pf00106; Pf01370; Pf01488; Pf04321; Pf08659	1.37976	1.37972	1.33677	0.999973	0.850758	0.968846	0.915009
Q4V8I6	Ribosomal protein L11 OS=Rattus norvegicus GN=Rpl11 PE=2 SV=1 - [Q4V8I6_RAT]	19.0121	9.80322	18.56	3	5	structural molecule activity; RNA binding	nucleus; organelle lumen; cytoplasm; ribosome; cytosol	metabolic process; transport	Pf00281; Pf00673	0.50009	0.399729	0.479414	0.799314	0.190117	0.958657	0.848773
Q568F3	Proteasome subunit beta type OS=Danio rerio GN=psmb4 PE=2 SV=1 - [Q568F3_DANRE]	24.0303	5.89697	18.6	2	2	catalytic activity	proteasome; nucleus; cytoplasm	metabolic process	Pf00227	1.42297	1.34335	1.34922	0.944045	0.861013	0.948175	0.781017
Q5U300	Ubiquitin-like modifier-activating enzyme 1 OS=Rattus norvegicus GN=Uba1 PE=1 SV=1 - [UBA1_RAT]	117.713	5.56689	18.62	11	4	nucleotide binding; catalytic activity		metabolic process	Pf00899; Pf02134; Pf09358; Pf10585	0.580049	0.795964	0.546067	1.37223	0.0398221	0.941415	0.737765
A2BEN1	Uncharacterized protein OS=Danio rerio GN=atp6v1aa PE=3 SV=1 - [A2BEN1_DANRE]	68.3347	5.57959	18.64	2	3	nucleotide binding; transporter activity; catalytic activity	membrane	metabolic process; transport; cellular homeostasis; response to stimulus	Pf00006; Pf00306; Pf02874	1.76928	2.05932	1.6879	1.16393	0.278327	0.954004	0.81862
D3ZUM0	Glutathione S-transferase theta-1 OS=Rattus norvegicus GN=Gstt1 PE=2 SV=1 - [D3ZUM0_RAT]	27.5804	7.26904	18.67	3	1	catalytic activity; antioxidant activity; protein binding	cytoplasm; cytosol	metabolic process	Pf00043; Pf02798	0.581535	0.45831	0.511812	0.788103	0.159552	0.880105	0.384512
B0BMT9	Sqrdl protein OS=Rattus norvegicus GN=Sqrdl PE=2 SV=1 - [B0BMT9_RAT]	50.1698	9.0708	18.67	8	4	catalytic activity	cytoplasm; mitochondrion; membrane	metabolic process	Pf07992	0.84467	1.04978	0.755788	1.24282	0.14127	0.894773	0.460302
B3DJ54	Zgc:194768 OS=Danio rerio GN=zgc:194768 PE=2 SV=1 - [B3DJ54_DANRE]	74.5791	6.65381	18.67	8	2	catalytic activity		metabolic process	Pf01175	1.46114	1.71124	1.28542	1.17117	0.262431	0.879737	0.3827
F1QCD4	Aspartate aminotransferase OS=Danio rerio GN=got2b PE=2 SV=1 - [F1QCD4_DANRE]	47.3802	8.57275	18.69	2	2	catalytic activity		metabolic process	Pf00155	1.61749	1.59157	1.45005	0.983972	0.925928	0.896481	0.469551
B8JKW4	Uncharacterized protein OS=Danio rerio GN=c3a PE=2 SV=1 - [B8JKW4_DANRE]	183.117	6.56592	18.69	23	6	enzyme regulator activity; protein binding	extracellular; membrane	metabolic process; regulation of biological process	Pf00207; Pf01759; Pf01821; Pf01835; Pf07677; Pf07678; Pf07703; Pf10569; Pf11974	1.06401	1.06032	1.09701	0.996533	0.866728	1.03101	0.656951
Q66HG4	Aldose 1-epimerase OS=Rattus norvegicus GN=Galm PE=1 SV=1 - [GALM_RAT]	37.8692	6.65381	18.71	5	1	catalytic activity	cytoplasm	metabolic process	Pf01263	0.534853	0.501147	0.4556	0.936981	0.820952	0.851821	0.25889
P15865	Histone H1.4 OS=Rattus norvegicus GN=Hist1h1e PE=1 SV=3 - [H14_RAT]	21.974	11.1069	18.72	3	7	DNA binding	chromosome; nucleus; organelle lumen	cell organization and biogenesis; metabolic process	Pf00538	3.10115	1.3654	1.64945	0.440288	7.54275e-08	0.531883	1.12113e-06
F1RD78	Uncharacterized protein OS=Danio rerio GN=zgc:153346 PE=2 SV=1 - [F1RD78_DANRE]	52.6784	6.22705	18.73	7	6		membrane		Pf05161	1.27911	1.30588	1.25392	1.02093	0.756137	0.980309	0.989378
A4QP55	Acmsd protein OS=Danio rerio GN=acmsd PE=2 SV=1 - [A4QP55_DANRE]	37.9571	6.45557	18.75	5	2	catalytic activity		metabolic process	Pf04909	0.924236	1.02362	0.899157	1.10753	0.428954	0.972866	0.941138
P70584	Short/branched chain specific acyl-CoA dehydrogenase, mitochondrial OS=Rattus norvegicus GN=Acadsb PE=1 SV=1 - [ACDSB_RAT]	47.7933	8.06006	18.75	7	1	catalytic activity	cytoplasm; mitochondrion; organelle lumen	metabolic process	Pf00441; Pf02770; Pf02771; Pf08028	0.652474	0.730737	0.62316	1.11995	0.391571	0.955073	0.825539
G3V640	Mitochondrial import inner membrane translocase subunit TIM44 OS=Rattus norvegicus GN=Timm44 PE=4 SV=1 - [G3V640_RAT]	51.0284	8.30908	18.76	7	2	nucleotide binding; transporter activity; protein binding	cytoplasm; mitochondrion; membrane; organelle lumen	transport	Pf04280	0.33234	0.214558	0.285469	0.645597	0.00565677	0.858965	0.287922
P46413	Glutathione synthetase OS=Rattus norvegicus GN=Gss PE=1 SV=1 - [GSHB_RAT]	52.3119	5.66846	18.78	8	1	nucleotide binding; metal ion binding; catalytic activity; protein binding		metabolic process; response to stimulus	Pf03199; Pf03917	0.6192	0.522963	0.564554	0.844578	0.35004	0.911749	0.555796
Q64232	Very-long-chain enoyl-CoA reductase OS=Rattus norvegicus GN=Tecr PE=2 SV=1 - [TECR_RAT]	36.0988	9.5542	18.83	6	5	catalytic activity	cytoplasm; endoplasmic reticulum; membrane	metabolic process	Pf02544	0.194073	0.167182	0.40152	0.861439	0.423894	2.06891	1.12836e-11
Q803H6	Adka protein OS=Danio rerio GN=adka PE=2 SV=1 - [Q803H6_DANRE]	37.4207	5.60498	18.86	5	3	catalytic activity		metabolic process	Pf00294	1.18297	1.19344	1.12328	1.00885	0.810083	0.949538	0.789792
A4V6L3	HnRNP F protein (Fragment) OS=Dugesia japonica PE=2 SV=1 - [A4V6L3_DUGJA]	39.6376	6.81494	18.9	6	1	nucleotide binding			Pf00076	1.80666	1.58711	1.95585	0.878476	0.505347	1.08258	0.374131
P20814	Cytochrome P450 2C13, male-specific OS=Rattus norvegicus GN=Cyp2c13 PE=1 SV=1 - [CP2CD_RAT]	55.8235	7.21045	18.98	4	3	catalytic activity; metal ion binding	cytoplasm; endoplasmic reticulum; membrane	metabolic process	Pf00067	0.868002	0.797264	0.768285	0.918505	0.71723	0.885119	0.409658
P10783	Hemoglobin subunit alpha-1 OS=Triturus cristatus PE=1 SV=1 - [HBA1_TRICR]	15.6481	8.19189	19.01	2	2	transporter activity; metal ion binding	cytoplasm; cytosol	transport	Pf00042	0.490007	0.891754	0.864169	1.81988	0.000197966	1.76359	9.58226e-08
Q7ZUQ9	Cold inducible RNA binding protein OS=Danio rerio GN=cirbp PE=2 SV=1 - [Q7ZUQ9_DANRE]	19.1919	9.30518	19.02	2	6	nucleotide binding		response to stimulus	Pf00076; Pf08777	0.8537	0.874158	0.829953	1.02396	0.742872	0.972183	0.936703
Q5PQK5	Radixin OS=Rattus norvegicus GN=Rdx PE=2 SV=1 - [Q5PQK5_RAT]	68.5013	6.26514	19.04	5	15	protein binding	cytoplasm; cytoskeleton; membrane	cell organization and biogenesis; regulation of biological process; response to stimulus	Pf00373; Pf00769; Pf09379; Pf09380	0.938063	1.4955	0.8495	1.59424	0.00327716	0.905589	0.52027
P18297	Sepiapterin reductase OS=Rattus norvegicus GN=Spr PE=1 SV=1 - [SPRE_RAT]	28.1105	5.70654	19.08	4	2	nucleotide binding; catalytic activity	nucleus; organelle lumen; cytoplasm; mitochondrion	metabolic process; response to stimulus; regulation of biological process; cell differentiation; cell organization and biogenesis; development	Pf00106	0.730786	0.762404	0.730541	1.04327	0.661204	0.999664	0.870639
Q6TGS8	Mitochondrial uncoupling protein 3 OS=Danio rerio GN=ucp1 PE=2 SV=1 - [Q6TGS8_DANRE]	33.7146	9.99365	19.09	4	2		membrane; cytoplasm; mitochondrion	transport; response to stimulus	Pf00153	1.10546	1.23273	1.36629	1.11512	0.405805	1.23594	0.0361064
Q6NWE0	Ester hydrolase C11orf54 homolog OS=Danio rerio GN=zgc:85789 PE=2 SV=1 - [CK054_DANRE]	35.2155	5.79541	19.12	4	2	catalytic activity; metal ion binding	nucleus		Pf08925	0.97642	0.757392	0.860635	0.775683	0.12979	0.88142	0.391024
Q7ZVF3	Succinate dehydrogenase [ubiquinone] flavoprotein subunit, mitochondrial OS=Danio rerio GN=sdha PE=2 SV=2 - [DHSA_DANRE]	72.0316	6.59521	19.21	2	3	catalytic activity	cytoplasm; mitochondrion; membrane	metabolic process; transport	Pf00890; Pf02910	1.50533	1.63966	1.41061	1.08924	0.488497	0.937077	0.710273
Q7T3G4	Phosphoglycerate mutase 2 (Muscle) OS=Danio rerio GN=pgam2 PE=2 SV=1 - [Q7T3G4_DANRE]	28.806	8.70459	19.22	3	2	catalytic activity		metabolic process	Pf00300	0.953982	0.813788	0.944508	0.853043	0.386224	0.990069	0.940232
D3ZF13	Acyl carrier protein OS=Rattus norvegicus GN=LOC683884 PE=3 SV=1 - [D3ZF13_RAT]	17.5031	5.07178	19.23	3	2		cytoplasm; mitochondrion; membrane	metabolic process	Pf00550	0.38614	0.285851	0.282212	0.740278	0.0667144	0.730854	0.019009
H1ZWN3	Small HSP protein (Fragment) OS=Dugesia japonica GN=smallhsp PE=2 SV=1 - [H1ZWN3_DUGJA]	21.6618	5.88428	19.27	4	1				Pf00011	1.97585	1.86397	2.1242	0.943375	0.857209	1.07508	0.409134
Q1ECX9	Pdia4 protein OS=Danio rerio GN=pdia4 PE=2 SV=1 - [Q1ECX9_DANRE]	72.4214	5.21143	19.31	9	5	catalytic activity; metal ion binding	cytoplasm; endoplasmic reticulum; organelle lumen	metabolic process; cellular homeostasis; regulation of biological process	Pf00085; Pf01216	1.10049	1.07273	1.10154	0.974773	0.970055	1.00095	0.861444
A9C3Q7	Aminomethyltransferase OS=Danio rerio GN=amt PE=3 SV=1 - [A9C3Q7_DANRE]	44.716	8.85107	19.32	7	2	catalytic activity	cytoplasm	metabolic process	Pf01571; Pf08669	0.90037	1.08438	1.21496	1.20437	0.198569	1.3494	0.00378195
Q7T2P2	Chaperonin containing TCP1, subunit 3 (Gamma) OS=Danio rerio GN=cct3 PE=2 SV=1 - [Q7T2P2_DANRE]	60.2442	6.02393	19.34	4	2	nucleotide binding; protein binding	cytoplasm	metabolic process; cell death; cell differentiation; development; regulation of biological process	Pf00118	1.25035	0.996504	1.05819	0.79698	0.183459	0.846317	0.237802
F1Q4Q8	Uncharacterized protein OS=Danio rerio GN=sardh PE=3 SV=1 - [F1Q4Q8_DANRE]	102.75	7.15186	19.37	4	2	catalytic activity	cytoplasm	metabolic process	Pf01266; Pf01571; Pf08669	1.24242	1.35588	1.34063	1.09132	0.481432	1.07905	0.390353
Q5U3U3	Carnitine O-palmitoyltransferase 2, mitochondrial OS=Danio rerio GN=cpt2 PE=2 SV=2 - [CPT2_DANRE]	74.869	8.25049	19.43	7	2	catalytic activity	cytoplasm; mitochondrion; membrane	metabolic process; transport	Pf00755	1.12929	1.12015	1.09445	0.991905	0.888383	0.969141	0.916928
D3JZ63	Dynamin-1-like protein (Fragment) OS=Schmidtea mediterranea PE=2 SV=1 - [D3JZ63_SCHMD]	32.0597	8.27979	19.49	4	1	protein binding; nucleotide binding			Pf01031	1.51944	1.45882	1.40047	0.960103	0.952124	0.921702	0.615052
Q6P603	Annexin OS=Danio rerio GN=anxa2a PE=2 SV=1 - [Q6P603_DANRE]	38.1148	7.7085	19.58	5	2	enzyme regulator activity; metal ion binding; protein binding			Pf00191	1.30233	1.15773	1.20932	0.888969	0.558475	0.928587	0.657208
F1LXA0	Protein Ndufa12 (Fragment) OS=Rattus norvegicus GN=Ndufa12 PE=4 SV=1 - [F1LXA0_RAT]	17.5979	9.80322	19.59	2	1	catalytic activity	cytoplasm; mitochondrion; membrane	response to stimulus	Pf05071	0.94294	0.787646	0.66716	0.835309	0.312597	0.707531	0.00924343
Q6P948	Pdha1 protein OS=Danio rerio GN=pdha1a PE=2 SV=1 - [Q6P948_DANRE]	43.7128	7.95752	19.59	4	4	catalytic activity		metabolic process	Pf00676	1.3003	1.81439	1.33151	1.39536	0.0312249	1.024	0.702516
Q6PFN9	Glycine dehydrogenase (Decarboxylating) OS=Danio rerio GN=gldc PE=2 SV=1 - [Q6PFN9_DANRE]	109.239	7.34229	19.63	10	2	catalytic activity		metabolic process	Pf02347	0.974662	0.987536	1.02348	1.01321	0.79044	1.05009	0.541096
O55171	Acyl-coenzyme A thioesterase 2, mitochondrial OS=Rattus norvegicus GN=Acot2 PE=1 SV=1 - [ACOT2_RAT]	49.6697	7.82568	19.65	8	10	catalytic activity; protein binding	cytoplasm; mitochondrion; organelle lumen	metabolic process; response to stimulus	Pf01738; Pf04775; Pf08840	0.903332	0.987096	0.662797	1.09273	0.476722	0.733724	0.0206551
F1QUE7	Uncharacterized protein OS=Danio rerio GN=calrl PE=2 SV=1 - [F1QUE7_DANRE]	48.2579	4.4624	19.66	2	7	metal ion binding; protein binding	cytoplasm; endoplasmic reticulum	metabolic process	Pf00262	0.906421	0.866721	1.05289	0.956202	0.930025	1.16159	0.1259
G3V8Q6	Protein kinase, cAMP-dependent, regulatory, type 2, alpha, isoform CRA_a OS=Rattus norvegicus GN=Prkar2a PE=4 SV=1 - [G3V8Q6_RAT]	45.4517	4.93213	19.7	6	8	enzyme regulator activity; catalytic activity; protein binding; nucleotide binding	cytoplasm; cytoskeleton; membrane	metabolic process; regulation of biological process; cell communication; response to stimulus; cell organization and biogenesis	Pf00027; Pf02197; Pf05758	0.710112	0.682639	0.729072	0.961311	0.958955	1.0267	0.684783
D3ZJD3	Protein LOC100362069 OS=Rattus norvegicus GN=LOC100362069 PE=4 SV=1 - [D3ZJD3_RAT]	15.5555	11.9272	19.71	4	5	structural molecule activity	cytoplasm; ribosome	metabolic process	Pf01778	0.415734	0.479355	0.383854	1.15303	0.303679	0.923317	0.624867
B8JLS3	Uncharacterized protein OS=Danio rerio GN=myh6 PE=4 SV=1 - [B8JLS3_DANRE]	222.667	5.68115	19.73	3	9	nucleotide binding; catalytic activity; motor activity; protein binding	extracellular; cytoplasm; cytoskeleton; membrane	cell organization and biogenesis; regulation of biological process; cellular component movement; development; cell differentiation	Pf00063; Pf01576; Pf02736; Pf05557; Pf05622; Pf06008; Pf06160; Pf07888; Pf09726; Pf12128	2.36888	2.2558	2.34727	0.952264	0.907683	0.990877	0.93432
P63029	Translationally-controlled tumor protein OS=Rattus norvegicus GN=Tpt1 PE=1 SV=1 - [TCTP_RAT]	19.4496	4.85596	19.77	3	1	metal ion binding; protein binding	extracellular; nucleus; organelle lumen; cytoplasm; endosome; cytoskeleton	reproduction; cell proliferation; response to stimulus; cell differentiation; regulation of biological process; cell death	Pf00838	0.331713	0.264792	0.256409	0.798258	0.187084	0.772986	0.0573993
Q8K4G6	O-acetyl-ADP-ribose deacetylase MACROD1 (Fragment) OS=Rattus norvegicus GN=Macrod1 PE=2 SV=2 - [MACD1_RAT]	28.6249	8.41162	19.77	3	3	catalytic activity	cytoplasm; mitochondrion	metabolic process	Pf01661	1.375	1.47705	1.50469	1.07422	0.541352	1.09432	0.323641
B1WC26	N-acetylneuraminic acid synthase OS=Rattus norvegicus GN=Nans PE=2 SV=1 - [B1WC26_RAT]	40.0254	6.84424	19.78	5	1	catalytic activity	cytoplasm; cytosol	metabolic process	Pf03102; Pf08666	0.487407	0.456929	0.372943	0.937469	0.823717	0.765158	0.0475802
Q5XI86	Peptidyl-tRNA hydrolase 2 OS=Rattus norvegicus GN=Ptrh2 PE=1 SV=1 - [Q5XI86_RAT]	19.5171	7.41553	19.89	2	1	catalytic activity; protein binding	cytoplasm; mitochondrion	cell death; regulation of biological process	Pf01981	0.727565	0.645002	0.763468	0.886522	0.545904	1.04935	0.545374
Q6NUY0	Uncharacterized protein OS=Danio rerio GN=ak4 PE=2 SV=1 - [Q6NUY0_DANRE]	25.4253	8.80713	19.91	3	1	nucleotide binding; catalytic activity	cytoplasm	metabolic process	Pf00406; Pf05191	1.32865	1.28041	1.26451	0.963697	0.972432	0.951729	0.803917
E9QFR8	Uncharacterized protein OS=Danio rerio GN=actn2 PE=2 SV=1 - [E9QFR8_DANRE]	103.146	5.2749	19.91	3	6	protein binding; metal ion binding			Pf00307; Pf00435; Pf08726; Pf11971	1.94351	1.70269	2.11114	0.876089	0.49356	1.08625	0.357793
Q68FT9	Selenocysteine lyase OS=Rattus norvegicus GN=Scly PE=1 SV=1 - [SCLY_RAT]	47.2262	6.60986	19.91	6	1	catalytic activity	cytoplasm; cytosol	metabolic process	Pf00266	0.625692	0.526831	0.648428	0.841998	0.339384	1.03634	0.623374
Q561S8	Zgc:77665 protein (Fragment) OS=Danio rerio GN=arf6b PE=2 SV=1 - [Q561S8_DANRE]	18.3645	7.97217	20	3	9	nucleotide binding; signal transducer activity	nucleus; cytoplasm	cell communication; regulation of biological process; response to stimulus; development	Pf00025; Pf00071; Pf00503; Pf04670; Pf08477; Pf09439	0.515025	0.460503	0.582963	0.894136	0.58536	1.13191	0.195419
F1R5X7	Uncharacterized protein (Fragment) OS=Danio rerio GN=dhrs11b PE=3 SV=1 - [F1R5X7_DANRE]	28.3675	8.01611	20	3	4	nucleotide binding; catalytic activity	membrane	metabolic process	Pf00106; Pf08659	0.898002	1.00125	1.2169	1.11497	0.406252	1.35511	0.00334289
B0V0X1	Uncharacterized protein OS=Danio rerio GN=pccb PE=4 SV=1 - [B0V0X1_DANRE]	60.6438	7.84033	20	5	3	catalytic activity			Pf01039	1.22871	1.15341	1.24565	0.938721	0.830809	1.01379	0.771297
A2BIP1	Uncharacterized protein (Fragment) OS=Danio rerio GN=atp2a3 PE=4 SV=1 - [A2BIP1_DANRE]	102.622	5.75732	20.06	2	2	nucleotide binding; catalytic activity; transporter activity; metal ion binding	membrane	metabolic process; transport	Pf00122; Pf00689; Pf00702; Pf08282; Pf12710	1.97473	2.54042	1.83346	1.28647	0.093984	0.928464	0.656447
Q6P4V5	Sterol carrier protein 2 OS=Danio rerio GN=scp2a PE=2 SV=1 - [Q6P4V5_DANRE]	57.9398	7.37158	20.07	6	1	catalytic activity		metabolic process	Pf00108; Pf02036; Pf02803	1.28143	1.18875	1.30418	0.927676	0.768454	1.01776	0.744242
O35567	Bifunctional purine biosynthesis protein PURH OS=Rattus norvegicus GN=Atic PE=1 SV=2 - [PUR9_RAT]	64.1682	7.13721	20.1	6	1	catalytic activity; protein binding	cytoplasm; mitochondrion	metabolic process; response to stimulus; development	Pf01808; Pf02142	0.857284	0.83211	0.841469	0.970635	0.990078	0.981553	0.997412
P50503	Hsc70-interacting protein OS=Rattus norvegicus GN=St13 PE=1 SV=1 - [F10A1_RAT]	41.2534	5.38916	20.11	7	1	protein binding; nucleotide binding	cytoplasm; cytosol	metabolic process; cell organization and biogenesis; regulation of biological process	Pf00515	0.951989	1.41583	0.885661	1.48723	0.0113911	0.930327	0.667996
Q6NSN2	Amine oxidase [flavin-containing] OS=Danio rerio GN=mao PE=1 SV=1 - [AOF_DANRE]	58.7266	8.68994	20.11	8	1	catalytic activity	cytoplasm; mitochondrion; membrane	metabolic process; cell communication	Pf01593	1.17309	1.27687	1.25842	1.08846	0.491134	1.07273	0.420518
D4A101	AP-2 complex subunit alpha-2 OS=Rattus norvegicus GN=Ap2a2 PE=2 SV=1 - [D4A101_RAT]	103.097	7.1958	20.13	11	3	transporter activity	membrane; cytoplasm	transport	Pf01602; Pf02296; Pf02883	1.08343	1.34698	1.11363	1.24326	0.14071	1.02788	0.677134
P24268	Cathepsin D OS=Rattus norvegicus GN=Ctsd PE=1 SV=1 - [CATD_RAT]	44.6519	7.09326	20.15	6	3	catalytic activity	extracellular; cytoplasm; mitochondrion; vacuole	cell communication; cell organization and biogenesis; metabolic process; response to stimulus; development	Pf00026; Pf07966	0.513581	0.376416	0.575701	0.732925	0.0572121	1.12095	0.227781
A7MC82	Malic enzyme OS=Danio rerio GN=me1 PE=2 SV=1 - [A7MC82_DANRE]	64.4572	7.28369	20.21	9	11	nucleotide binding; catalytic activity; metal ion binding		metabolic process	Pf00390; Pf03949	1.03383	1.11579	1.0558	1.07928	0.523142	1.02126	0.720707
Q6AYT9	Acyl-coenzyme A synthetase ACSM5, mitochondrial OS=Rattus norvegicus GN=Acsm5 PE=2 SV=1 - [ACSM5_RAT]	64.5819	7.89893	20.24	8	3	nucleotide binding; catalytic activity; metal ion binding	cytoplasm; mitochondrion; organelle lumen	metabolic process	Pf00501	1.34437	1.15505	1.23296	0.859174	0.413563	0.917122	0.587524
Q6P2M0	Zgc:77235 OS=Danio rerio GN=zgc:77235 PE=2 SV=1 - [Q6P2M0_DANRE]	16.569	10.7554	20.27	2	2	structural molecule activity	cytoplasm; ribosome	metabolic process	Pf00828	0.906016	0.685505	0.817427	0.756615	0.0920462	0.902222	0.501256
B5DDU6	Rpl28l protein OS=Danio rerio GN=rpl28 PE=2 SV=1 - [B5DDU6_DANRE]	15.6458	12.1177	20.29	3	3	structural molecule activity	cytoplasm; ribosome	metabolic process; development	Pf01778	0.839125	0.856758	0.929595	1.02101	0.755781	1.10782	0.271908
Q6I7R1	Dehydrogenase/reductase (SDR family) member 7 OS=Rattus norvegicus GN=Dhrs7 PE=2 SV=1 - [Q6I7R1_RAT]	36.3782	7.62061	20.37	5	1	nucleotide binding; catalytic activity		metabolic process	Pf00106; Pf08659	0.446717	0.418339	0.410026	0.936475	0.818091	0.917865	0.59196
Q5BK63	NADH dehydrogenase [ubiquinone] 1 alpha subcomplex subunit 9, mitochondrial OS=Rattus norvegicus GN=Ndufa9 PE=1 SV=2 - [NDUA9_RAT]	42.5323	9.81787	20.42	7	1	nucleotide binding; catalytic activity	cytoplasm; mitochondrion; membrane; organelle lumen	metabolic process; transport; response to stimulus	Pf01073; Pf01370; Pf05368	0.421404	0.324647	0.328266	0.770393	0.118381	0.778981	0.0659293
E7F238	Uncharacterized protein OS=Danio rerio GN=CABZ01059390.1 PE=3 SV=1 - [E7F238_DANRE]	24.2461	9.45166	20.45	2	2		membrane	transport	Pf00153	0.910959	0.836623	0.788496	0.918398	0.716637	0.865567	0.316398
Q4KM74	Vesicle-trafficking protein SEC22b OS=Rattus norvegicus GN=Sec22b PE=1 SV=3 - [SC22B_RAT]	24.7248	8.51416	20.47	4	7		cytoplasm; Golgi; membrane; endoplasmic reticulum	transport	Pf00957	0.334023	0.51689	0.308854	1.54747	0.00569657	0.924647	0.632981
F8WFM1	Eukaryotic translation initiation factor 5 OS=Rattus norvegicus GN=Eif5 PE=4 SV=1 - [F8WFM1_RAT]	48.8897	5.51611	20.51	8	13	RNA binding; protein binding		metabolic process	Pf01873; Pf02020	0.431389	0.384009	0.457074	0.890169	0.56468	1.05954	0.488448
Q642Z0	Sarcoendoplasmic reticulum calcium ATPase OS=Danio rerio GN=atp2a1 PE=2 SV=1 - [Q642Z0_DANRE]	108.687	5.18604	20.52	6	4	nucleotide binding; catalytic activity; transporter activity; metal ion binding	cytoplasm; endoplasmic reticulum; membrane	metabolic process; transport; cellular homeostasis; regulation of biological process; response to stimulus	Pf00122; Pf00689; Pf00690; Pf00702; Pf08282; Pf12710	1.4379	1.80574	1.47969	1.25582	0.125408	1.02906	0.669446
Q63570	26S protease regulatory subunit 6B OS=Rattus norvegicus GN=Psmc4 PE=1 SV=1 - [PRS6B_RAT]	47.3786	5.21143	20.57	6	5	nucleotide binding; RNA binding; catalytic activity	proteasome; nucleus; organelle lumen; cytoplasm; mitochondrion	development; metabolic process; response to stimulus; reproduction	Pf00004; Pf00006; Pf00910; Pf01057; Pf01078; Pf05496; Pf07724; Pf07726; Pf07728	1.44262	1.29975	1.49598	0.900969	0.621557	1.03699	0.619336
P61354	60S ribosomal protein L27 OS=Rattus norvegicus GN=Rpl27 PE=2 SV=2 - [RL27_RAT]	15.7877	10.5649	20.59	3	5	structural molecule activity	cytoplasm; ribosome; cytosol	metabolic process	Pf01777	0.33478	0.316005	0.320079	0.943918	0.86029	0.956086	0.832102
E9PSW4	Protein Aox4 OS=Rattus norvegicus GN=Aox4 PE=2 SV=1 - [E9PSW4_RAT]	146.766	6.58057	20.69	18	17	catalytic activity; metal ion binding; nucleotide binding	membrane	metabolic process	Pf00941; Pf01315; Pf01799; Pf02738; Pf03450	0.667022	0.922973	0.728737	1.38372	0.0353104	1.09252	0.33103
Q924S5	Lon protease homolog, mitochondrial OS=Rattus norvegicus GN=Lonp1 PE=2 SV=1 - [LONM_RAT]	105.726	6.59521	20.74	9	1	nucleotide binding; DNA binding; RNA binding; catalytic activity; protein binding	cytoplasm; mitochondrion; organelle lumen	response to stimulus; metabolic process; cell organization and biogenesis	Pf00004; Pf00910; Pf02190; Pf05362; Pf05496; Pf07724; Pf07728; Pf08298	0.575589	0.490064	0.504205	0.851413	0.379111	0.87598	0.364447
Q4QQW3	Hydroxyacid-oxoacid transhydrogenase, mitochondrial OS=Rattus norvegicus GN=Adhfe1 PE=1 SV=1 - [HOT_RAT]	50.1935	7.54736	20.77	7	1	catalytic activity; metal ion binding	cytoplasm; mitochondrion	transport; metabolic process	Pf00465	0.645384	0.672716	0.583991	1.04235	0.66497	0.904874	0.516205
P21213	Histidine ammonia-lyase OS=Rattus norvegicus GN=Hal PE=1 SV=1 - [HUTH_RAT]	72.2385	6.50732	20.85	10	1	catalytic activity	cytoplasm; cytosol	metabolic process	Pf00221	1.08823	0.772612	0.899211	0.709973	0.034116	0.826309	0.17053
Q6NYS8	Dolichyl-diphosphooligosaccharide--protein glycosyltransferase 48 kDa subunit OS=Danio rerio GN=ddost PE=2 SV=2 - [OST48_DANRE]	48.5036	5.47803	20.86	3	2	catalytic activity	cytoplasm; endoplasmic reticulum; membrane	metabolic process	Pf03345	1.04764	1.35163	1.04139	1.29017	0.0907012	0.994037	0.911287
Q9YIB4	Collagen alpha-1(I) chain OS=Cynops pyrrhogaster GN=COL1A1 PE=2 SV=1 - [CO1A1_CYNPY]	137.479	5.56689	20.97	24	2	structural molecule activity; protein binding	extracellular		Pf00093; Pf01391; Pf01410	0.271616	0.644028	0.322874	2.3711	1.27181e-07	1.18871	0.0817236
P00564	Creatine kinase M-type OS=Rattus norvegicus GN=Ckm PE=1 SV=2 - [KCRM_RAT]	43.0178	7.06396	21	5	2	nucleotide binding; catalytic activity	cytoplasm	metabolic process	Pf00217; Pf02807	0.224663	0.675429	0.648477	3.00642	2.3297e-11	2.88645	8.98306e-23
P81155	Voltage-dependent anion-selective channel protein 2 OS=Rattus norvegicus GN=Vdac2 PE=1 SV=2 - [VDAC2_RAT]	31.7256	7.48877	21.02	4	3	nucleotide binding; transporter activity	cytoplasm; mitochondrion; membrane; organelle lumen	transport; cell organization and biogenesis; regulation of biological process; cell communication; cell death; response to stimulus	Pf01459	0.462812	0.30253	0.419117	0.653678	0.007314	0.905588	0.520266
B0BNG1	Probable proline dehydrogenase 2 OS=Rattus norvegicus GN=Prodh2 PE=2 SV=1 - [B0BNG1_RAT]	51.0552	8.51416	21.05	8	2	catalytic activity	cytoplasm; mitochondrion; membrane	metabolic process	Pf01619	1.12901	1.64332	0.866549	1.45554	0.016244	0.767531	0.050406
A2VCW9	Alpha-aminoadipic semialdehyde synthase, mitochondrial OS=Rattus norvegicus GN=Aass PE=2 SV=1 - [AASS_RAT]	102.842	6.91748	21.06	14	3	nucleotide binding; catalytic activity	cytoplasm; mitochondrion	metabolic process	Pf01262; Pf03435; Pf05222	0.675651	0.551029	0.622546	0.815553	0.240776	0.921402	0.613239
B0UYS4	Uncharacterized protein OS=Danio rerio GN=dera PE=4 SV=1 - [B0UYS4_DANRE]	35.0331	9.14404	21.07	5	2	catalytic activity	cytoplasm	metabolic process	Pf01791	1.22902	1.47909	1.20215	1.20348	0.200109	0.978143	0.975364
Q5EB55	Gbe1 protein (Fragment) OS=Rattus norvegicus GN=Gbe1 PE=2 SV=1 - [Q5EB55_RAT]	61.7929	6.07471	21.08	7	2	catalytic activity		metabolic process	Pf00128; Pf02806	0.63609	0.755042	0.531095	1.18701	0.23017	0.834937	0.197741
P62744	AP-2 complex subunit sigma OS=Rattus norvegicus GN=Ap2s1 PE=2 SV=1 - [AP2S1_RAT]	17.0067	6.17627	21.13	3	2	transporter activity	cytoplasm; Golgi; membrane	transport	Pf01217	1.42299	1.12071	1.27073	0.787576	0.158203	0.892997	0.450771
Q8JHJ1	60S ribosomal protein L35 OS=Danio rerio GN=rpl35 PE=2 SV=3 - [RL35_DANRE]	14.4215	11.1655	21.14	3	6	structural molecule activity	cytoplasm; ribosome	metabolic process; development; regulation of biological process	Pf00831	0.628367	0.525565	0.619432	0.836398	0.316877	0.985781	0.971732
F1QJK4	Uncharacterized protein OS=Danio rerio GN=si:ch211-150d5.2 PE=4 SV=2 - [F1QJK4_DANRE]	196.225	5.5542	21.17	10	10	nucleotide binding; catalytic activity; motor activity; protein binding; transporter activity	extracellular; membrane; cytoskeleton; cytoplasm; mitochondrion	transport; metabolic process	Pf00063; Pf01442; Pf01496; Pf01576; Pf02463; Pf02736; Pf03194; Pf05557; Pf05911; Pf06637; Pf07888; Pf09726; Pf09731; Pf11068; Pf11559; Pf12128	1.27138	1.22065	1.23978	0.960099	0.952099	0.975143	0.95592
P18422	Proteasome subunit alpha type-3 OS=Rattus norvegicus GN=Psma3 PE=1 SV=3 - [PSA3_RAT]	28.4011	5.43994	21.18	5	5	catalytic activity	proteasome; nucleus; cytoplasm	metabolic process	Pf00227; Pf10584	1.41076	1.24692	1.27044	0.883865	0.532377	0.900534	0.49184
P97886	UDP-glucuronosyltransferase OS=Rattus norvegicus GN=Ugt1a6 PE=2 SV=1 - [P97886_RAT]	60.2099	8.68994	21.32	5	26	catalytic activity; protein binding	cytoplasm; membrane; mitochondrion; endoplasmic reticulum	development; metabolic process; response to stimulus	Pf00201; Pf04101	0.661119	0.535425	0.673256	0.809877	0.222206	1.01836	0.740162
I1ZIJ2	High mobility group-1 OS=Schmidtea mediterranea PE=2 SV=1 - [I1ZIJ2_SCHMD]	22.6202	8.14795	21.35	4	1				Pf00505	2.15281	2.01509	2.30407	0.936026	0.815546	1.07026	0.432756
B0V1I3	Uncharacterized protein OS=Danio rerio GN=upb1 PE=4 SV=1 - [B0V1I3_DANRE]	43.2857	6.99072	21.35	5	3	catalytic activity		metabolic process	Pf00795	1.45695	1.47252	1.43885	1.01068	0.801796	0.987578	0.958502
F1LMJ9	Protein Eprs OS=Rattus norvegicus GN=Eprs PE=2 SV=1 - [F1LMJ9_RAT]	169.753	7.44482	21.36	24	4	nucleotide binding; catalytic activity	cytoplasm	metabolic process	Pf00458; Pf00587; Pf00749; Pf01406; Pf03129; Pf03950; Pf09180	0.669755	0.737936	0.861937	1.1018	0.447028	1.28694	0.013736
F1M853	Protein Rrbp1 (Fragment) OS=Rattus norvegicus GN=Rrbp1 PE=2 SV=1 - [F1M853_RAT]	143.155	8.96826	21.37	25	5		nucleus; organelle lumen; cytoplasm; endoplasmic reticulum; membrane	metabolic process; regulation of biological process; transport	Pf00038; Pf03962; Pf04156; Pf07888; Pf08317; Pf09606; Pf12128	0.545757	0.46388	0.500452	0.849975	0.372896	0.916988	0.586722
G3V9N8	AP-1 complex subunit beta-1 OS=Rattus norvegicus GN=Ap1b1 PE=4 SV=1 - [G3V9N8_RAT]	104.473	5.09717	21.39	7	5	transporter activity; protein binding	cytoplasm; Golgi; membrane	transport; cell organization and biogenesis	Pf01602; Pf02883; Pf09066; Pf12717	1.01249	0.883292	1.02701	0.872398	0.475566	1.01434	0.76752
Q6P6R6	Transglutaminase 2, C polypeptide OS=Rattus norvegicus GN=Tgm2 PE=2 SV=1 - [Q6P6R6_RAT]	76.8871	5.07178	21.43	13	2	catalytic activity; protein binding; nucleotide binding; metal ion binding	cytoplasm; mitochondrion; membrane	cell death; regulation of biological process; cell communication; response to stimulus; metabolic process; transport; cell proliferation; defense response; cell organization and biogenesis; cellular homeostasis; development	Pf00868; Pf00927; Pf01841	0.745076	0.745698	0.675179	1.00083	0.846776	0.906188	0.52368
Q794E4	Heterogeneous nuclear ribonucleoprotein F OS=Rattus norvegicus GN=Hnrnpf PE=1 SV=3 - [HNRPF_RAT]	45.7009	5.49072	21.45	5	7	nucleotide binding; RNA binding; protein binding	nucleus; organelle lumen; spliceosomal complex; cytoplasm	metabolic process; regulation of biological process	Pf00076; Pf08080	0.478808	0.640254	0.564062	1.33718	0.0570525	1.17805	0.0971736
F1M789	Protein Myh13 (Fragment) OS=Rattus norvegicus GN=Myh13 PE=2 SV=1 - [F1M789_RAT]	208.836	5.59229	21.47	5	11	nucleotide binding; catalytic activity; motor activity; protein binding; transporter activity	chromosome; nucleus; organelle lumen; cytoplasm; Golgi; cytoskeleton; membrane; mitochondrion	cell organization and biogenesis; transport; reproduction; cell differentiation	Pf00063; Pf00261; Pf01496; Pf01576; Pf02463; Pf03961; Pf04156; Pf05478; Pf05483; Pf05557; Pf05622; Pf05667; Pf05701; Pf06160; Pf07111; Pf07888; Pf09726; Pf09730; Pf09731; Pf10174; Pf10498; Pf11932; Pf12004; Pf12128	0.406408	0.679927	0.959194	1.67301	0.00125942	2.36018	1.36022e-15
H2ESD9	Protein arginine methyltransferase 1-like protein OS=Schmidtea mediterranea PE=2 SV=1 - [H2ESD9_SCHMD]	39.718	5.50342	21.49	6	2	catalytic activity	cytoplasm; membrane	metabolic process	Pf02475; Pf06325; Pf08241; Pf12847	1.75468	1.68367	1.9432	0.959531	0.948889	1.10744	0.273253
F1LSS4	Protein Pacrg (Fragment) OS=Rattus norvegicus GN=Pacrg PE=2 SV=1 - [F1LSS4_RAT]	12.4526	7.02002	21.5	2	5		cytoplasm; mitochondrion	cell differentiation; reproduction	Pf10274	2.63706	1.29457	1.88967	0.490915	3.56347e-06	0.716582	0.0123502
Q68G19	Protein Ugt2b36 OS=Rattus norvegicus GN=Ugt2b15 PE=2 SV=1 - [Q68G19_RAT]	60.9871	8.01611	21.51	2	16	catalytic activity	cytoplasm; endoplasmic reticulum; membrane	metabolic process; response to stimulus	Pf00201; Pf04101	0.932588	1.11988	0.793608	1.20083	0.204706	0.850975	0.255574
Q86M45	Intermediate filament protein OS=Dugesia japonica GN=Djf-2 PE=2 SV=1 - [Q86M45_DUGJA]	72.0199	5.8208	21.51	11	2	structural molecule activity	cytoskeleton		Pf00038; Pf00932	1.52966	1.37626	1.54208	0.899715	0.614859	1.00812	0.810643
D3ZKG1	Protein LOC100361295 OS=Rattus norvegicus GN=LOC100361295 PE=4 SV=1 - [D3ZKG1_RAT]	82.8727	7.03467	21.52	7	1	catalytic activity; metal ion binding	cytoplasm; mitochondrion	metabolic process; development	Pf01642; Pf02310	0.751361	0.702055	0.876227	0.934378	0.806226	1.16619	0.11724
D3ZE15	RCG38845, isoform CRA_b OS=Rattus norvegicus GN=LOC100911483 PE=4 SV=1 - [D3ZE15_RAT]	16.7657	9.48096	21.53	2	2				Pf06212	0.485702	0.397581	0.480143	0.81857	0.251026	0.988556	0.951324
F1QSP8	Uncharacterized protein OS=Danio rerio GN=prdx4 PE=2 SV=1 - [F1QSP8_DANRE]	29.0928	6.60986	21.54	3	2	antioxidant activity; catalytic activity		metabolic process	Pf00578; Pf08534; Pf10417	1.06233	0.839972	1.12891	0.790688	0.166285	1.06267	0.471721
F1RAM4	Uncharacterized protein OS=Danio rerio GN=zgc:110339 PE=2 SV=1 - [F1RAM4_DANRE]	26.8098	7.00537	21.57	5	3	nucleotide binding; catalytic activity		metabolic process	Pf00106; Pf08659	0.810836	0.997334	0.816003	1.23001	0.158565	1.00637	0.822926
Q6AYT0	Quinone oxidoreductase OS=Rattus norvegicus GN=Cryz PE=2 SV=1 - [QOR_RAT]	34.9531	8.22119	21.58	4	2	nucleotide binding; RNA binding; catalytic activity; metal ion binding	cytoplasm; Golgi; cytosol	metabolic process; response to stimulus; cell organization and biogenesis	Pf00107; Pf08240	0.616729	0.590122	0.543045	0.956857	0.933741	0.880524	0.386581
B2GV15	Dihydrolipoamide branched chain transacylase E2 OS=Rattus norvegicus GN=Dbt PE=2 SV=1 - [B2GV15_RAT]	53.24	8.41162	21.58	11	4	catalytic activity	cytoplasm; mitochondrion; cytoskeleton; organelle lumen	metabolic process	Pf00198; Pf00364; Pf02817	0.472098	0.411399	0.437532	0.871427	0.47088	0.926781	0.646067
F1Q6B5	Uncharacterized protein OS=Danio rerio GN=aco2 PE=2 SV=1 - [F1Q6B5_DANRE]	84.7074	7.54736	21.61	7	3	catalytic activity		metabolic process	Pf00330; Pf00694	1.11692	1.18233	1.10002	1.05856	0.600178	0.984868	0.97846
A8WFQ6	Putative uncharacterized protein (Fragment) OS=Danio rerio PE=2 SV=1 - [A8WFQ6_DANRE]	45.1275	9.78857	21.67	5	3		membrane	transport	Pf00153	0.973241	0.958621	1.05481	0.984979	0.921139	1.08382	0.368574
F1QHK5	Uncharacterized protein (Fragment) OS=Danio rerio GN=agxt2 PE=3 SV=1 - [F1QHK5_DANRE]	54.1664	8.17725	21.69	8	2	catalytic activity		metabolic process	Pf00155; Pf00202	1.0062	1.13918	1.08079	1.13216	0.357166	1.07413	0.413714
Q5BJN1	Protein Stard10 OS=Rattus norvegicus GN=Stard10 PE=2 SV=1 - [Q5BJN1_RAT]	32.8835	7.12256	21.72	6	1				Pf01852	0.555047	0.453607	0.458141	0.81724	0.246475	0.825409	0.167848
Q5U3G0	Progesterone receptor membrane component 1 OS=Danio rerio GN=pgrmc1 PE=2 SV=1 - [Q5U3G0_DANRE]	20.2692	4.84326	21.79	3	1				Pf00173	1.0915	1.01024	1.02891	0.92555	0.756528	0.942649	0.745629
F1QGH7	Uncharacterized protein OS=Danio rerio GN=ctnnb1 PE=2 SV=1 - [F1QGH7_DANRE]	85.5142	5.85889	21.79	10	17	protein binding			Pf00514	0.972768	1.40934	0.885613	1.44879	0.0175034	0.910406	0.54797
Q6PBZ1	Ribosomal protein L7a OS=Danio rerio GN=rpl7a PE=2 SV=1 - [Q6PBZ1_DANRE]	29.9919	10.5649	21.8	2	11		cytoplasm; ribosome		Pf01248	1.03113	0.954003	1.01589	0.925204	0.754589	0.985227	0.975812
F1QGH9	26S proteasome non-ATPase regulatory subunit 11B OS=Danio rerio GN=psmd11b PE=2 SV=1 - [PS11B_DANRE]	47.5472	6.17627	21.8	2	1	protein binding	proteasome	metabolic process; cell organization and biogenesis; cell differentiation	Pf01399	0.793054	1.36295	1.04068	1.7186	0.000715121	1.31224	0.00825501
Q5XHZ0	Heat shock protein 75 kDa, mitochondrial OS=Rattus norvegicus GN=Trap1 PE=1 SV=1 - [TRAP1_RAT]	80.4108	7.03467	21.81	12	1	nucleotide binding; protein binding	cytoplasm; mitochondrion	metabolic process; response to stimulus		1.10621	1.49361	1.25286	1.35021	0.0499844	1.13257	0.193595
Q6NYP1	Uncharacterized protein OS=Danio rerio GN=snx12 PE=2 SV=1 - [Q6NYP1_DANRE]	17.591	6.04932	21.85	3	7	protein binding		cell communication	Pf00787	1.52204	1.81292	1.35018	1.19111	0.222351	0.887088	0.419754
Q4JHL7	Voltage-dependent anion channel 2 OS=Danio rerio GN=vdac2 PE=2 SV=1 - [Q4JHL7_DANRE]	30.3373	8.63135	21.91	2	2	transporter activity	cytoplasm; membrane; mitochondrion	transport; development; response to stimulus; regulation of biological process	Pf01459	0.893327	0.878692	0.923572	0.983618	0.927617	1.03386	0.638897
Q9DDE1	Trypsin (Fragment) OS=Danio rerio GN=try PE=2 SV=1 - [Q9DDE1_DANRE]	15.5173	6.72705	21.92	2	4	catalytic activity		metabolic process	Pf00089	1.14028	1.24128	1.14567	1.08858	0.490729	1.00473	0.834508
A3KNV0	Dci protein (Fragment) OS=Danio rerio GN=eci1 PE=2 SV=1 - [A3KNV0_DANRE]	34.1444	8.30908	21.94	6	5	catalytic activity		metabolic process	Pf00378	1.04867	0.964102	1.04471	0.919353	0.721941	0.996219	0.895463
E7F3G8	Uncharacterized protein OS=Danio rerio GN=BX927387.2 PE=3 SV=1 - [E7F3G8_DANRE]	65.9503	9.14404	21.99	8	1	catalytic activity; metal ion binding		metabolic process	Pf00067	1.24603	1.13679	1.12248	0.91233	0.683146	0.900847	0.493582
F1LRA1	Protein ERGIC-53 OS=Rattus norvegicus GN=Lman1 PE=2 SV=1 - [F1LRA1_RAT]	57.7837	6.02393	22.01	8	2		cytoplasm; Golgi; membrane	cell organization and biogenesis; regulation of biological process	Pf03388	1.33256	1.32214	1.40366	0.992183	0.887077	1.05336	0.522491
Q9I8V0	Parvalbumin-2 OS=Danio rerio GN=pvalb2 PE=3 SV=3 - [PRV2_DANRE]	11.6148	4.67822	22.02	2	1	metal ion binding				1.08438	1.17593	1.13538	1.08442	0.50505	1.04703	0.558843
Q804W1	Parvalbumin isoform 4b OS=Danio rerio GN=pvalb6 PE=4 SV=1 - [Q804W1_DANRE]	11.977	5.07178	22.02	2	1	metal ion binding				3.95739	1.51718	1.61831	0.38338	2.58553e-10	0.408933	3.48396e-12
D4A5G8	Protein LOC100365902 OS=Rattus norvegicus GN=LOC685778 PE=4 SV=1 - [D4A5G8_RAT]	43.2467	8.19189	22.05	5	3	catalytic activity		metabolic process	Pf00676	0.905247	0.794096	0.811693	0.877214	0.499103	0.896653	0.470491
Q5FVQ6	Interferon-gamma-inducible GTPase Ifgga3 protein OS=Rattus norvegicus GN=MGC108823 PE=2 SV=1 - [Q5FVQ6_RAT]	48.1595	6.18896	22.06	3	2	nucleotide binding; catalytic activity	membrane	response to stimulus	Pf05049	1.05765	1.07767	0.955534	1.01894	0.764939	0.903453	0.508175
Q6DHL6	40S ribosomal protein S6 OS=Danio rerio GN=zgc:92237 PE=2 SV=1 - [Q6DHL6_DANRE]	28.691	11.0923	22.09	2	2	structural molecule activity	cytoplasm; ribosome; cytosol	metabolic process	Pf01092	1.12761	1.2475	1.17046	1.10632	0.43272	1.038	0.613104
Q66HK8	Cytochrome P450 4F1 OS=Rattus norvegicus GN=Cyp4f1 PE=2 SV=1 - [Q66HK8_RAT]	59.852	6.87354	22.14	6	5	catalytic activity; metal ion binding	cytoplasm; endoplasmic reticulum; membrane	metabolic process; response to stimulus	Pf00067	1.11862	1.03376	1.04239	0.924139	0.748625	0.931855	0.677503
Q6DHE7	Uncharacterized protein OS=Danio rerio GN=decr1 PE=2 SV=1 - [Q6DHE7_DANRE]	34.6648	8.76318	22.15	4	2	nucleotide binding; catalytic activity		metabolic process	Pf00106; Pf01370; Pf08659	0.919228	0.861031	0.986175	0.93669	0.819306	1.07283	0.420044
Q6NWI6	Zgc:85683 OS=Danio rerio GN=fahd2a PE=2 SV=1 - [Q6NWI6_DANRE]	32.0253	5.5542	22.15	6	2	catalytic activity		metabolic process	Pf01557	1.17167	1.17727	1.17168	1.00478	0.828653	1.00001	0.868175
Q7ZU25	ATPase, Na+/K+ transporting, alpha 1 polypeptide OS=Danio rerio GN=atp1a1 PE=2 SV=1 - [Q7ZU25_DANRE]	113.22	5.35107	22.18	3	20	nucleotide binding; catalytic activity; transporter activity; metal ion binding	membrane	development; metabolic process; transport; cell organization and biogenesis; cell differentiation; cellular component movement	Pf00122; Pf00689; Pf00690; Pf00702; Pf08282; Pf12710	0.996046	1.10806	1.03143	1.11246	0.413828	1.03553	0.628415
Q7ZUI0	Ribosomal protein L5a OS=Danio rerio GN=rpl5a PE=2 SV=1 - [Q7ZUI0_DANRE]	34.0627	9.62744	22.22	2	1	structural molecule activity; RNA binding	cytoplasm; ribosome	metabolic process; development	Pf00861	1.20779	1.20231	1.1484	0.995464	0.871714	0.950825	0.798082
Q7SZ49	Short chain dehydrogenase/reductase family 16C, member 5 OS=Danio rerio GN=sdr16c5b PE=2 SV=1 - [Q7SZ49_DANRE]	33.7626	8.41162	22.22	5	2	nucleotide binding; catalytic activity		metabolic process	Pf00106; Pf08659	1	1.22181	0.912441	1.22181	0.170548	0.912441	0.55985
Q64550	UDP-glucuronosyltransferase 1-1 OS=Rattus norvegicus GN=Ugt1a1 PE=1 SV=1 - [UD11_RAT]	59.6238	8.48486	22.24	5	21	enzyme regulator activity; catalytic activity; protein binding	cytoplasm; endoplasmic reticulum; membrane	development; metabolic process; defense response; response to stimulus; regulation of biological process	Pf00201; Pf04101	0.5202	0.437306	0.413868	0.840649	0.333887	0.795594	0.0946573
P27364	3 beta-hydroxysteroid dehydrogenase type 5 OS=Rattus norvegicus GN=Hsd3b5 PE=2 SV=3 - [3BHS5_RAT]	42.1797	8.26514	22.25	7	6	nucleotide binding; catalytic activity	cytoplasm; mitochondrion; endoplasmic reticulum; membrane	metabolic process; regulation of biological process	Pf00106; Pf01073; Pf01370; Pf02719; Pf04321; Pf05368; Pf07993; Pf08659	0.544208	0.620617	0.622352	1.1404	0.335254	1.14359	0.165066
Q7ZU41	Tyrosine 3-monooxygenase/tryptophan 5-monooxygenase activation protein, iota polypeptide OS=Danio rerio GN=ywhaz PE=2 SV=1 - [Q7ZU41_DANRE]	26.2151	4.95752	22.27	2	4	catalytic activity; protein binding			Pf00244	1.03852	0.999772	0.97564	0.962691	0.966755	0.939454	0.725312
F1LRP0	Mitochondrial inner membrane protein OS=Rattus norvegicus GN=Immt PE=2 SV=1 - [F1LRP0_RAT]	78.5662	5.75732	22.28	12	5		cytoplasm; mitochondrion; membrane		Pf09731	0.82616	0.903085	0.686655	1.09311	0.47544	0.83114	0.185435
E7F7J1	Uncharacterized protein OS=Danio rerio GN=fdx1 PE=4 SV=1 - [E7F7J1_DANRE]	19.2897	5.42725	22.29	4	1	metal ion binding				0.974993	1.11262	1.1658	1.14115	0.333312	1.1957	0.0727914
Q6TNU6	Dihydrolipoyl dehydrogenase OS=Danio rerio GN=dldh PE=2 SV=1 - [Q6TNU6_DANRE]	53.5866	7.51807	22.29	5	2	catalytic activity	cytoplasm	metabolic process; cellular homeostasis; regulation of biological process	Pf00070; Pf00890; Pf01134; Pf01494; Pf02852; Pf03486; Pf07992; Pf12831	1.24328	1.14236	1.02086	0.918825	0.719004	0.821107	0.155416
Q5XJS8	Hydroxysteroid (17-beta) dehydrogenase 10 OS=Danio rerio GN=hsd17b10 PE=2 SV=1 - [Q5XJS8_DANRE]	27.0402	7.91357	22.31	3	1	nucleotide binding; catalytic activity		metabolic process	Pf00106; Pf01370; Pf08659	1.2724	1.4417	1.11857	1.13306	0.354734	0.879103	0.379583
Q6P6E0	ATP synthase, H+ transporting, mitochondrial F0 complex, subunit g OS=Danio rerio GN=atp5l PE=4 SV=1 - [Q6P6E0_DANRE]	11.3081	9.75928	22.33	2	2	transporter activity	cytoplasm; membrane; mitochondrion	metabolic process; transport	Pf04718	0.938635	0.897155	0.928459	0.955808	0.927795	0.989159	0.9469
F1QTF0	Uncharacterized protein OS=Danio rerio GN=hmgcl PE=4 SV=1 - [F1QTF0_DANRE]	35.8365	7.85498	22.35	3	4	catalytic activity		metabolic process	Pf00682	0.832845	0.936222	1.00442	1.12412	0.37954	1.20601	0.0611575
A4V6L6	TLS-associated protein (Fragment) OS=Dugesia japonica PE=2 SV=1 - [A4V6L6_DUGJA]	23.6865	11.8687	22.39	3	1	nucleotide binding			Pf00076	1.55818	1.58115	1.45894	1.01474	0.783577	0.93631	0.705433
Q6LCA5	CAMP-dependent protein kinase type I regulatory subunit (Fragment) OS=Rattus norvegicus GN=Prkar1a PE=2 SV=1 - [Q6LCA5_RAT]	28.1824	4.93213	22.4	2	10	enzyme regulator activity; catalytic activity; nucleotide binding; protein binding	cytoplasm	development; metabolic process; regulation of biological process; reproduction; cell communication; response to stimulus; cell differentiation; cell organization and biogenesis; cell proliferation	Pf00027	0.951119	0.971028	1.01838	1.02093	0.756138	1.07072	0.430464
Q5RKJ9	RAB10, member RAS oncogene family OS=Rattus norvegicus GN=Rab10 PE=2 SV=1 - [Q5RKJ9_RAT]	22.5266	8.38232	22.5	2	62	nucleotide binding; protein binding	nucleus; cytoplasm; Golgi; membrane	cell communication; regulation of biological process; response to stimulus; transport	Pf00025; Pf00071; Pf04670; Pf08477	0.527797	0.361066	0.289018	0.6841	0.017696	0.547593	3.51939e-06
P07895	Superoxide dismutase [Mn], mitochondrial OS=Rattus norvegicus GN=Sod2 PE=1 SV=2 - [SODM_RAT]	24.6586	8.80713	22.52	5	1	DNA binding; antioxidant activity; catalytic activity; metal ion binding; protein binding	cytoplasm; mitochondrion; membrane; organelle lumen	response to stimulus; cell communication; cell death; cell organization and biogenesis; regulation of biological process; development; metabolic process; cell proliferation; cell differentiation; cellular homeostasis	Pf00081; Pf02777	0.75156	0.59766	0.643265	0.795226	0.178559	0.855907	0.275263
Q561S0	NADH dehydrogenase [ubiquinone] 1 alpha subcomplex subunit 10, mitochondrial OS=Rattus norvegicus GN=Ndufa10 PE=1 SV=1 - [NDUAA_RAT]	40.4676	7.79639	22.54	6	2	nucleotide binding; catalytic activity	cytoplasm; mitochondrion; membrane; organelle lumen	metabolic process; transport; response to stimulus	Pf01712	0.73327	0.5521	0.543221	0.752928	0.0857937	0.74082	0.0252342
P04550	Parathymosin OS=Rattus norvegicus GN=Ptms PE=1 SV=2 - [PTMS_RAT]	11.5522	4.1958	22.55	3	2	enzyme regulator activity; metal ion binding	cytoplasm; cytosol	metabolic process; regulation of biological process		0.18937	0.100159	0.0913354	0.528907	3.67697e-05	0.482312	1.64209e-08
P36365	Dimethylaniline monooxygenase [N-oxide-forming] 1 OS=Rattus norvegicus GN=Fmo1 PE=1 SV=2 - [FMO1_RAT]	59.7867	8.27979	22.56	10	1	catalytic activity; nucleotide binding	cytoplasm; endoplasmic reticulum; membrane	metabolic process; response to stimulus	Pf00743; Pf07992	0.653143	0.79471	0.586996	1.21675	0.178317	0.898725	0.481836
Q7TP48	Adipocyte plasma membrane-associated protein OS=Rattus norvegicus GN=Apmap PE=2 SV=2 - [APMAP_RAT]	42.0355	5.85889	22.61	7	4	catalytic activity	cell surface; membrane	metabolic process	Pf03088; Pf08450	0.445685	0.280519	0.232195	0.62941	0.00327953	0.520984	4.81609e-07
Q4V8F6	Pcbp2 protein OS=Rattus norvegicus GN=Pcbp2 PE=2 SV=1 - [Q4V8F6_RAT]	35.3242	8.00146	22.69	3	22	RNA binding; protein binding	nucleus; organelle lumen; cytoplasm	metabolic process; defense response; regulation of biological process; response to stimulus	Pf00013	0.770812	0.730918	0.730075	0.948244	0.884856	0.94715	0.774435
A3FG33	Alpha II-spectrin OS=Danio rerio GN=spna2 PE=2 SV=1 - [A3FG33_DANRE]	284.782	5.23682	22.7	12	9	metal ion binding; protein binding		cell differentiation; cell organization and biogenesis; development	Pf00018; Pf00435; Pf07653; Pf08726	1.35192	1.31095	1.25521	0.969694	0.994642	0.928465	0.656454
F1QTB5	Uncharacterized protein OS=Danio rerio GN=rpn1 PE=2 SV=1 - [F1QTB5_DANRE]	67.616	6.68311	22.74	10	6	catalytic activity	cytoplasm; endoplasmic reticulum; membrane	metabolic process	Pf04597	1.11619	1.25526	1.19016	1.12459	0.378209	1.06627	0.452975
Q7TPB1	T-complex protein 1 subunit delta OS=Rattus norvegicus GN=Cct4 PE=1 SV=3 - [TCPD_RAT]	58.0628	8.01611	22.82	5	1	nucleotide binding; protein binding	nucleus; organelle lumen; cytoplasm; cytoskeleton; cytosol	metabolic process	Pf00118	1.02983	1.30643	0.888897	1.26858	0.111358	0.863145	0.305767
O35814	Stress-induced-phosphoprotein 1 OS=Rattus norvegicus GN=Stip1 PE=1 SV=1 - [STIP1_RAT]	62.5304	6.80029	22.84	12	2	protein binding	nucleus; cytoplasm		Pf00515	0.821824	0.753375	0.890615	0.916711	0.70729	1.08371	0.369063
A3KQR0	Uncharacterized protein OS=Danio rerio GN=acadl PE=4 SV=1 - [A3KQR0_DANRE]	49.4211	8.19189	22.85	6	3	catalytic activity		metabolic process	Pf00441; Pf02770; Pf02771; Pf08028	1.30355	1.2467	1.12858	0.95639	0.931092	0.865773	0.317311
P09875	UDP-glucuronosyltransferase 2B1 OS=Rattus norvegicus GN=Ugt2b1 PE=2 SV=1 - [UD2B1_RAT]	60.4452	8.41162	22.87	7	16	catalytic activity	cytoplasm; endoplasmic reticulum; membrane	metabolic process; response to stimulus	Pf00201; Pf04101	0.564196	0.390932	0.430145	0.6929	0.0223285	0.762403	0.0444591
F1R9U9	Uncharacterized protein (Fragment) OS=Danio rerio GN=plgrkt PE=4 SV=2 - [F1R9U9_DANRE]	13.9312	9.64209	22.95	2	2		membrane		Pf10166	1.10736	1.09307	1.11199	0.987091	0.911108	1.00418	0.83841
Q6IQB1	Ribosomal protein L5b OS=Danio rerio GN=rpl5b PE=2 SV=1 - [Q6IQB1_DANRE]	34.0327	9.68604	22.97	3	2	structural molecule activity; RNA binding	cytoplasm; ribosome	metabolic process	Pf00861	1.10807	1.10493	1.07885	0.997164	0.863791	0.973626	0.946077
D4A5K4	Kynurenine 3-monooxygenase OS=Rattus norvegicus GN=Kmo PE=2 SV=1 - [D4A5K4_RAT]	50.1564	8.47021	22.97	9	2	catalytic activity	membrane	metabolic process	Pf01494	0.571554	0.438112	0.493166	0.766528	0.110509	0.862851	0.304491
F1QSE1	Uncharacterized protein OS=Danio rerio GN=vmhcl PE=2 SV=1 - [F1QSE1_DANRE]	223.236	5.66846	22.99	2	14	nucleotide binding; catalytic activity; motor activity; protein binding	chromosome; nucleus; organelle lumen; cytoplasm; membrane; cytoskeleton	cell organization and biogenesis; reproduction	Pf00063; Pf00261; Pf01576; Pf02736; Pf05483; Pf05622; Pf07888; Pf09726; Pf10174; Pf12128	0.488918	0.721885	0.953891	1.4765	0.0128565	1.95102	3.98451e-10
Q7ZVJ0	Profilin OS=Danio rerio GN=pfn2l PE=2 SV=1 - [Q7ZVJ0_DANRE]	15.0784	5.96045	23.02	3	3	protein binding	cytoskeleton	cell organization and biogenesis	Pf00235	0.791691	0.846535	0.954663	1.06927	0.559522	1.20585	0.0613197
Q6TNV0	Cytochrome c oxidase subunit IV isoform 1 OS=Danio rerio GN=cox4i1 PE=2 SV=1 - [Q6TNV0_DANRE]	19.373	9.31982	23.08	4	2	catalytic activity; transporter activity		response to stimulus	Pf02936	1.63606	1.50907	1.37218	0.922382	0.738811	0.838712	0.210504
Q7SXK5	Probable imidazolonepropionase OS=Danio rerio GN=amdhd1 PE=2 SV=2 - [HUTI_DANRE]	46.8739	6.52197	23.09	2	1	catalytic activity; metal ion binding	cytoplasm	metabolic process	Pf01979; Pf07969	1.71242	1.53574	1.54234	0.896822	0.599501	0.900675	0.492626
Q9JKB7	Guanine deaminase OS=Rattus norvegicus GN=Gda PE=2 SV=1 - [Q9JKB7_RAT]	50.8687	5.71924	23.13	9	2	metal ion binding; catalytic activity		metabolic process	Pf01979; Pf07969	0.475709	0.503477	0.538343	1.05837	0.600919	1.13166	0.196108
Q63598	Plastin-3 OS=Rattus norvegicus GN=Pls3 PE=2 SV=2 - [PLST_RAT]	70.6351	5.47803	23.17	7	4	protein binding; metal ion binding	cytoplasm; membrane	cell differentiation; development	Pf00307	1.17798	1.05772	1.14223	0.897911	0.60527	0.969651	0.920243
Q6PHD9	Selenium-binding protein 1 OS=Danio rerio GN=selenbp1 PE=2 SV=1 - [SBP1_DANRE]	50.9505	6.25244	23.19	4	2	protein binding	nucleus; cytoplasm; cytosol; membrane	transport	Pf05694	0.630179	0.630574	0.632845	1.00063	0.847734	1.00423	0.838068
D3ZTP0	Protein Aldh1l2 OS=Rattus norvegicus GN=Aldh1l2 PE=3 SV=1 - [D3ZTP0_RAT]	101.733	6.34131	23.19	12	1	catalytic activity	cytoplasm; mitochondrion	metabolic process	Pf00171; Pf00550; Pf00551; Pf02911	0.980265	1.00953	0.965698	1.02986	0.717419	0.98514	0.976458
B1WC61	Acad9 protein OS=Rattus norvegicus GN=Acad9 PE=2 SV=1 - [B1WC61_RAT]	68.7997	7.69385	23.2	13	2	catalytic activity	nucleus; cytoplasm; mitochondrion	metabolic process	Pf00441; Pf02770; Pf02771; Pf08028	0.78934	1.18044	0.993697	1.49548	0.0103736	1.2589	0.0236142
F1RBR6	Phosphotriesterase-related protein OS=Danio rerio GN=pter PE=2 SV=1 - [F1RBR6_DANRE]	39.1781	6.65381	23.21	6	2	metal ion binding; catalytic activity		metabolic process	Pf01026; Pf02126	1.03271	1.25824	1.02672	1.21838	0.175777	0.994199	0.910109
O35826	Bifunctional UDP-N-acetylglucosamine 2-epimerase/N-acetylmannosamine kinase OS=Rattus norvegicus GN=Gne PE=1 SV=1 - [GLCNE_RAT]	79.1759	6.81494	23.27	13	5	nucleotide binding; catalytic activity; metal ion binding	cytoplasm; cytosol	metabolic process	Pf00370; Pf00480; Pf02350	0.677905	0.588876	0.650258	0.86867	0.457684	0.959216	0.852405
Q6AZC0	Uncharacterized protein OS=Danio rerio GN=zgc:92041 PE=2 SV=1 - [Q6AZC0_DANRE]	28.8463	8.104	23.31	5	2	catalytic activity		metabolic process	Pf00089	1.19399	1.21808	1.27492	1.02017	0.759479	1.06778	0.445258
A9JRS6	Krt4 protein OS=Danio rerio GN=krt4 PE=2 SV=1 - [A9JRS6_DANRE]	53.9799	5.38916	23.34	2	14	catalytic activity; motor activity; structural molecule activity	cytoskeleton; membrane	cell organization and biogenesis	Pf00038; Pf01576; Pf03148; Pf09726	0.576137	0.530096	0.486452	0.920087	0.726017	0.844334	0.230478
Q9PUC4	Proteasome activator subunit 2 OS=Danio rerio GN=psme2 PE=2 SV=1 - [Q9PUC4_DANRE]	27.7013	5.36377	23.36	3	1		proteasome		Pf02251; Pf02252	0.950745	0.92093	0.900628	0.96864	0.999762	0.947287	0.775312
B1H249	Gnpnat1 protein OS=Rattus norvegicus GN=Gnpnat1 PE=2 SV=1 - [B1H249_RAT]	20.8077	7.69385	23.37	3	1	catalytic activity	cytoplasm; endosome; Golgi	development; metabolic process		0.299195	0.24046	0.151874	0.803691	0.203023	0.50761	1.60553e-07
Q9EPH8	Polyadenylate-binding protein 1 OS=Rattus norvegicus GN=Pabpc1 PE=2 SV=1 - [PABP1_RAT]	70.6559	9.49561	23.43	3	14	nucleotide binding; RNA binding; protein binding	nucleus; spliceosomal complex; cytoplasm	metabolic process; regulation of biological process	Pf00076; Pf00658	1.00719	0.993845	1.03667	0.986751	0.91272	1.02927	0.668116
D3ZE63	Protein LOC679748 OS=Rattus norvegicus GN=LOC686548 PE=4 SV=1 - [D3ZE63_RAT]	12.5973	7.89893	23.48	3	4			response to stimulus; cell proliferation; cell communication; regulation of biological process	Pf01187	0.353193	0.416827	0.30174	1.18017	0.243679	0.85432	0.268831
Q18NX6	Putative 14-3-3 epsilon OS=Dugesia japonica PE=2 SV=1 - [Q18NX6_DUGJA]	28.1542	5.64307	23.48	5	1	protein binding			Pf00244	1.89735	1.77853	1.92203	0.937374	0.82318	1.013	0.776715
P50398	Rab GDP dissociation inhibitor alpha OS=Rattus norvegicus GN=Gdi1 PE=1 SV=1 - [GDIA_RAT]	50.5042	5.13525	23.49	4	6	enzyme regulator activity; protein binding	cytoplasm	transport; metabolic process; regulation of biological process; response to stimulus	Pf00996	0.724012	0.637189	0.528856	0.88008	0.513335	0.730451	0.0187868
F1QYB1	Uncharacterized protein (Fragment) OS=Danio rerio GN=agla PE=4 SV=1 - [F1QYB1_DANRE]	174.079	6.53662	23.52	26	1	catalytic activity	membrane	metabolic process	Pf00128; Pf06202	1.12524	1.12796	1.16043	1.00242	0.839476	1.03128	0.655252
Q64640	Adenosine kinase OS=Rattus norvegicus GN=Adk PE=1 SV=3 - [ADK_RAT]	40.1083	6.03662	23.55	8	1	nucleotide binding; catalytic activity; metal ion binding	nucleus; cytoplasm; cytosol	metabolic process; regulation of biological process; cell proliferation	Pf00294	0.366247	0.281831	0.324482	0.769511	0.11655	0.885965	0.413978
E9QHH7	Uncharacterized protein OS=Danio rerio GN=ck2a1 PE=2 SV=1 - [E9QHH7_DANRE]	16.5377	9.20264	23.57	2	8	nucleotide binding; catalytic activity		metabolic process	Pf00069	1.11786	0.851049	0.721577	0.761319	0.100503	0.645498	0.000863419
G3V741	Phosphate carrier protein, mitochondrial OS=Rattus norvegicus GN=Slc25a3 PE=3 SV=1 - [G3V741_RAT]	39.5054	9.26123	23.6	5	6	transporter activity	cytoplasm; mitochondrion; membrane	transport	Pf00153	0.690751	0.577625	0.654157	0.836227	0.316202	0.947022	0.773611
G3V6D8	Myosin-4 OS=Rattus norvegicus GN=Myh4 PE=4 SV=1 - [G3V6D8_RAT]	223.647	5.80811	23.61	7	9	nucleotide binding; catalytic activity; motor activity; protein binding	cytoplasm; Golgi; cytoskeleton; membrane	cell organization and biogenesis; transport	Pf00038; Pf00063; Pf00261; Pf01576; Pf02463; Pf02736; Pf05557; Pf05622; Pf05667; Pf05701; Pf06160; Pf07888; Pf08317; Pf09726; Pf09730; Pf10174; Pf12128; Pf12718	0.98573	0.732705	1.10879	0.743312	0.0709656	1.12485	0.215841
Q6DI22	Hydroxyacyl-Coenzyme A dehydrogenase OS=Danio rerio GN=hadh PE=2 SV=1 - [Q6DI22_DANRE]	33.3155	8.5874	23.62	5	1	nucleotide binding; catalytic activity		metabolic process	Pf00725; Pf01266; Pf02737	1.21242	1.09766	1.24595	0.905347	0.645097	1.02765	0.678585
Q90Z10	60S ribosomal protein L13 OS=Danio rerio GN=rpl13 PE=2 SV=3 - [RL13_DANRE]	24.3496	11.605	23.7	3	3	structural molecule activity	cytoplasm; ribosome	metabolic process; regulation of biological process	Pf01294	1.22625	1.24753	1.10726	1.01735	0.771968	0.902962	0.505409
P35704	Peroxiredoxin-2 OS=Rattus norvegicus GN=Prdx2 PE=1 SV=3 - [PRDX2_RAT]	21.7701	5.59229	23.74	5	2	antioxidant activity; catalytic activity	cytoplasm; mitochondrion; cytosol	cell communication; metabolic process; regulation of biological process; response to stimulus; defense response; coagulation; cell proliferation; cell death; cell differentiation; development	Pf00578; Pf08534; Pf10417	0.703573	0.642428	0.550143	0.913093	0.687335	0.781927	0.0704611
P83868	Prostaglandin E synthase 3 OS=Rattus norvegicus GN=Ptges3 PE=1 SV=2 - [TEBP_RAT]	18.7094	4.55127	23.75	3	2	protein binding; catalytic activity	nucleus; organelle lumen; cytoplasm; cytoskeleton	metabolic process; cell proliferation; regulation of biological process; cell communication; response to stimulus; development; cell death	Pf04969	0.819725	0.752165	0.6511	0.917582	0.712113	0.794292	0.0921172
Q64602	Kynurenine/alpha-aminoadipate aminotransferase, mitochondrial OS=Rattus norvegicus GN=Aadat PE=1 SV=1 - [AADAT_RAT]	47.7537	7.95752	23.76	9	1	catalytic activity; protein binding	cytoplasm; mitochondrion	metabolic process	Pf00155	0.986786	1.10385	0.940524	1.11863	0.395406	0.953119	0.812897
Q07071	Glucokinase regulatory protein OS=Rattus norvegicus GN=Gckr PE=1 SV=3 - [GCKR_RAT]	68.8738	6.97607	23.76	11	1	enzyme regulator activity; protein binding	nucleus; cytoplasm; mitochondrion; cytosol	transport; cellular homeostasis; metabolic process; response to stimulus; regulation of biological process		0.503637	0.434633	0.483726	0.862988	0.431034	0.960466	0.860522
F1LM22	UDP-glucuronosyltransferase 2B37 OS=Rattus norvegicus GN=Ugt2b17 PE=2 SV=1 - [F1LM22_RAT]	60.438	8.39697	23.77	4	18	catalytic activity		metabolic process	Pf00201; Pf04101	0.482168	0.376537	0.380831	0.780924	0.141834	0.789831	0.0837979
Q7SX99	Fumarate hydratase, mitochondrial OS=Danio rerio GN=fh PE=2 SV=1 - [FUMH_DANRE]	54.8264	8.89502	23.77	6	2	catalytic activity	cytoplasm; mitochondrion	metabolic process	Pf00206; Pf10415	1.19646	1.12789	1.16705	0.942695	0.853346	0.975422	0.957732
Q7T3H5	Glycerol-3-phosphate dehydrogenase 1 (Soluble) OS=Danio rerio GN=gpd1c PE=2 SV=1 - [Q7T3H5_DANRE]	38.1547	7.12256	23.78	3	1	nucleotide binding; catalytic activity; protein binding	cytoplasm	metabolic process	Pf01210; Pf07479	1.16281	1.24373	1.32066	1.06959	0.558366	1.13575	0.184997
D4A075	60S ribosomal protein L13 OS=Rattus norvegicus GN=LOC100361259 PE=3 SV=1 - [D4A075_RAT]	24.0542	11.356	23.81	3	8	structural molecule activity	cytoplasm; ribosome	metabolic process	Pf01294	0.871778	0.955167	0.718184	1.09565	0.467001	0.823816	0.163166
D3ZAF6	ATP synthase subunit f, mitochondrial OS=Rattus norvegicus GN=Atp5j2 PE=1 SV=1 - [ATPK_RAT]	10.4456	10.0376	23.86	2	1	catalytic activity	cytoplasm; membrane; mitochondrion	metabolic process; transport	Pf10206	0.291114	0.234053	0.252108	0.803994	0.203937	0.866014	0.318379
F1QZL6	Glucose-6-phosphate isomerase OS=Danio rerio GN=gpia PE=2 SV=1 - [F1QZL6_DANRE]	62.0453	6.94678	23.87	11	4	catalytic activity	cytoplasm	metabolic process	Pf00342	1.1374	1.23833	1.12477	1.08874	0.49018	0.988898	0.948813
F1QVX3	Uncharacterized protein OS=Danio rerio GN=myhb PE=4 SV=1 - [F1QVX3_DANRE]	222.704	5.89697	23.88	2	6	nucleotide binding; catalytic activity; motor activity; protein binding	chromosome; nucleus; organelle lumen; cytoplasm; cytoskeleton; membrane	cell organization and biogenesis; reproduction	Pf00038; Pf00063; Pf01576; Pf02463; Pf02736; Pf03962; Pf05483; Pf05557; Pf05622; Pf05667; Pf06160; Pf07888; Pf09726; Pf09789; Pf10174; Pf12128	0.631082	0.937634	0.989245	1.48576	0.0115826	1.56754	2.03595e-05
Q5I0N4	Estradiol 17-beta-dehydrogenase 2 OS=Rattus norvegicus GN=Hsd17b2 PE=2 SV=1 - [Q5I0N4_RAT]	42.0115	7.97217	23.88	8	2	nucleotide binding; catalytic activity	membrane	development; metabolic process; response to stimulus	Pf00106; Pf08643	0.953097	0.810092	0.726305	0.849957	0.372817	0.762047	0.0440669
Q7ZVG7	Fibrinogen, gamma polypeptide OS=Danio rerio GN=fgg PE=2 SV=1 - [Q7ZVG7_DANRE]	48.8014	5.2749	23.9	8	3	protein binding	extracellular	cell communication; regulation of biological process; response to stimulus; coagulation; cell organization and biogenesis	Pf00147; Pf08702	1.16932	1.21087	1.22316	1.03553	0.693321	1.04604	0.564642
P55159	Serum paraoxonase/arylesterase 1 OS=Rattus norvegicus GN=Pon1 PE=1 SV=3 - [PON1_RAT]	39.3331	5.22412	23.94	7	2	catalytic activity; metal ion binding; protein binding	extracellular	metabolic process; response to stimulus; regulation of biological process; transport	Pf01731; Pf03088; Pf08450	0.547495	0.382831	0.445386	0.699241	0.0262432	0.813499	0.135023
Q6AYT3	tRNA-splicing ligase RtcB homolog OS=Rattus norvegicus PE=2 SV=1 - [RTCB_RAT]	55.2139	7.2251	23.96	10	2	nucleotide binding; catalytic activity; protein binding; metal ion binding	cytoplasm	development; metabolic process	Pf01139	0.76323	0.788713	0.753768	1.03339	0.702375	0.987602	0.958324
Q4KM73	UMP-CMP kinase OS=Rattus norvegicus GN=Cmpk1 PE=1 SV=2 - [KCY_RAT]	22.1552	5.8335	23.98	3	1	nucleotide binding; catalytic activity	nucleus; cytoplasm	metabolic process; reproduction	Pf00406; Pf02223	0.559814	0.554875	0.662144	0.991176	0.891811	1.18279	0.0900213
Q7ZVA4	S100 calcium binding protein A10b OS=Danio rerio GN=s100a10b PE=4 SV=1 - [Q7ZVA4_DANRE]	11.1496	5.5415	24	2	2	metal ion binding			Pf00036; Pf01023	1.1131	1.09744	1.00903	0.985937	0.916585	0.906509	0.525514
D4A7P8	2-oxoglutarate dehydrogenase, mitochondrial OS=Rattus norvegicus GN=Ogdh PE=2 SV=1 - [D4A7P8_RAT]	115.209	6.94678	24.09	10	6	catalytic activity	membrane	metabolic process	Pf00676; Pf02779	0.295496	0.191648	0.521141	0.648563	0.00622318	1.76361	9.57491e-08
F1R966	Uncharacterized protein OS=Danio rerio GN=cltca PE=2 SV=1 - [F1R966_DANRE]	191.698	5.69385	24.11	2	3	structural molecule activity; protein binding	cytoplasm; membrane; Golgi	transport	Pf00637; Pf01394; Pf04053; Pf09268	1.33722	1.09683	1.26047	0.820238	0.256804	0.942606	0.745351
Q802C9	Eukaryotic translation initiation factor 4A, isoform 1A OS=Danio rerio GN=eif4a1a PE=2 SV=1 - [Q802C9_DANRE]	46.2237	5.41455	24.14	4	1	RNA binding; catalytic activity; nucleotide binding		metabolic process	Pf00270; Pf00271	1.20086	2.42258	1.2215	2.01736	1.49452e-05	1.01719	0.748105
D4A1D8	Protein Surf4 OS=Rattus norvegicus GN=Surf4 PE=4 SV=1 - [D4A1D8_RAT]	30.3608	7.78174	24.16	5	4	catalytic activity; transporter activity	cytoplasm; mitochondrion; membrane	cell organization and biogenesis; regulation of biological process; transport	Pf02077	0.354005	0.365214	0.387291	1.03166	0.70971	1.09403	0.324829
B1H1J6	Dpys protein OS=Danio rerio GN=dpys PE=2 SV=1 - [B1H1J6_DANRE]	54.6483	6.58057	24.2	6	12	catalytic activity	cytoplasm	metabolic process	Pf01979; Pf07969	1.0541	1.04601	0.997918	0.992322	0.886427	0.9467	0.771543
Q5SPA3	Uncharacterized protein OS=Danio rerio GN=acat2 PE=4 SV=1 - [Q5SPA3_DANRE]	41.4621	7.91357	24.3	7	4	catalytic activity		metabolic process	Pf00108; Pf02803	1.02565	1.19874	1.01015	1.16876	0.26765	0.984881	0.978366
P14942	Glutathione S-transferase alpha-4 OS=Rattus norvegicus GN=Gsta4 PE=1 SV=2 - [GSTA4_RAT]	25.4934	7.32764	24.32	5	5	catalytic activity; protein binding	cytoplasm; mitochondrion	metabolic process; response to stimulus	Pf00043; Pf02798	0.71692	0.630658	0.627162	0.879676	0.511319	0.8748	0.358813
D3ZEC3	Kynureninase OS=Rattus norvegicus GN=Kynu PE=2 SV=1 - [D3ZEC3_RAT]	52.4192	6.65381	24.35	10	3	catalytic activity	cytoplasm; membrane	metabolic process	Pf00266	0.690235	0.830448	0.692607	1.20314	0.200692	1.00344	0.843704
D4A264	Protein Zadh2 OS=Rattus norvegicus GN=Zadh2 PE=4 SV=1 - [D4A264_RAT]	40.4501	7.76709	24.4	7	1	nucleotide binding; metal ion binding; catalytic activity	cytoplasm; mitochondrion	metabolic process	Pf00107; Pf08240	1.16358	1.12592	1.16441	0.967633	0.99461	1.00071	0.863143
Q6DH63	Uncharacterized protein OS=Danio rerio GN=cox6b1 PE=4 SV=1 - [Q6DH63_DANRE]	10.327	8.1626	24.42	2	1	catalytic activity; transporter activity	cytoplasm; mitochondrion		Pf02297	0.799199	0.728421	0.870044	0.911439	0.67826	1.08865	0.347394
F1M9A7	Acyl-coenzyme A oxidase OS=Rattus norvegicus GN=Acox3 PE=2 SV=1 - [F1M9A7_RAT]	78.1548	8.14795	24.5	11	4	catalytic activity	cytoplasm	metabolic process	Pf00441; Pf01756; Pf02770	0.686497	0.678013	0.739733	0.987641	0.908503	1.07755	0.397378
O88994	MOSC domain-containing protein 2, mitochondrial OS=Rattus norvegicus GN=Marc2 PE=2 SV=1 - [MOSC2_RAT]	38.2237	8.67529	24.56	9	4	catalytic activity; metal ion binding	cytoplasm; mitochondrion; membrane	metabolic process	Pf03473; Pf03476	0.540429	0.596178	0.481091	1.10316	0.4427	0.890203	0.435969
Q642J0	Uncharacterized protein OS=Danio rerio GN=hint1 PE=2 SV=1 - [Q642J0_DANRE]	13.7261	6.68311	24.6	2	1	catalytic activity		metabolic process	Pf01230; Pf11969	0.685442	0.576439	0.677	0.840974	0.335207	0.987684	0.957723
Q4KLP0	Probable 2-oxoglutarate dehydrogenase E1 component DHKTD1, mitochondrial OS=Rattus norvegicus GN=Dhtkd1 PE=2 SV=1 - [DHTK1_RAT]	102.576	7.03467	24.67	16	3	catalytic activity	cytoplasm; mitochondrion	metabolic process	Pf00676; Pf02779	0.596754	0.589849	0.532254	0.988428	0.904776	0.891915	0.445012
A1L259	2-oxo-4-hydroxy-4-carboxy-5-ureidoimidazoline decarboxylase OS=Danio rerio GN=prhoxnb PE=1 SV=1 - [URAD_DANRE]	19.7301	5.89697	24.71	4	1	catalytic activity	cytoplasm	metabolic process	Pf09349	1.05169	1.04109	0.957131	0.989923	0.897718	0.910088	0.546125
Q5EBA4	Nipsnap1 protein (Fragment) OS=Rattus norvegicus GN=Nipsnap1 PE=2 SV=1 - [Q5EBA4_RAT]	33.194	9.37842	24.73	6	3		cytoplasm; mitochondrion; membrane		Pf07978	0.39727	0.343694	0.294621	0.86514	0.441041	0.741613	0.025794
Q6P6V0	Glucose-6-phosphate isomerase OS=Rattus norvegicus GN=Gpi PE=1 SV=1 - [G6PI_RAT]	62.7871	7.76709	24.73	7	2	catalytic activity; protein binding	extracellular; nucleus; organelle lumen; cytoplasm; cytosol; membrane	development; metabolic process; response to stimulus; cell death; regulation of biological process	Pf00342	0.624421	0.666891	0.575296	1.06801	0.56421	0.921328	0.612789
I1ZIB7	60S ribosomal protein L13a OS=Schmidtea mediterranea PE=2 SV=1 - [I1ZIB7_SCHMD]	22.8776	10.3745	24.75	4	1	structural molecule activity	cytoplasm; ribosome	metabolic process	Pf00572	1.88162	1.89195	1.88148	1.00549	0.825395	0.999922	0.868789
Q5PQK6	Nit1 protein OS=Rattus norvegicus GN=Nit1 PE=2 SV=1 - [Q5PQK6_RAT]	36.0701	7.03467	24.77	6	2	catalytic activity	cytoplasm; mitochondrion	metabolic process	Pf00795	0.3112	0.192814	0.191724	0.619582	0.00230685	0.616079	0.000213845
Q6IRK8	Spna2 protein OS=Rattus norvegicus GN=Sptan1 PE=2 SV=1 - [Q6IRK8_RAT]	282.206	5.31299	24.8	17	7	protein binding; metal ion binding	cytoplasm; cytosol; membrane; cytoskeleton	cell organization and biogenesis; regulation of biological process	Pf00018; Pf00036; Pf00435; Pf07653; Pf08726	0.940439	0.958573	0.898188	1.01928	0.763403	0.955073	0.825541
E7F5U9	Pyruvate kinase OS=Danio rerio GN=pkma PE=2 SV=1 - [E7F5U9_DANRE]	58.0736	6.48096	24.81	3	5	metal ion binding; catalytic activity	membrane	metabolic process	Pf00224; Pf02887	1.59345	1.45182	1.34601	0.91112	0.676514	0.844714	0.231871
F1LW12	C-1-tetrahydrofolate synthase, cytoplasmic (Fragment) OS=Rattus norvegicus GN=Mthfd1 PE=2 SV=1 - [F1LW12_RAT]	100.234	7.54736	24.81	17	7	nucleotide binding; catalytic activity	membrane	metabolic process	Pf00763; Pf01268; Pf02882	0.848302	0.744443	0.858386	0.877568	0.500853	1.01189	0.784428
F1RAF9	Uncharacterized protein (Fragment) OS=Danio rerio GN=shmt2 PE=2 SV=1 - [F1RAF9_DANRE]	54.1648	8.38232	24.85	5	2	catalytic activity		metabolic process	Pf00155; Pf00464	1.03861	1.02627	1.1089	0.98812	0.906235	1.06767	0.445809
G3V945	Aldehyde dehydrogenase family 5, subfamily A1 OS=Rattus norvegicus GN=Aldh5a1 PE=3 SV=1 - [G3V945_RAT]	56.1099	8.08936	24.86	10	3	catalytic activity; nucleotide binding	cytoplasm; mitochondrion	metabolic process; development; cell communication; cell organization and biogenesis	Pf00171	0.390006	0.514255	0.272677	1.31858	0.0687225	0.699161	0.00698786
Q9EQ76	Dimethylaniline monooxygenase [N-oxide-forming] 3 OS=Rattus norvegicus GN=Fmo3 PE=1 SV=1 - [FMO3_RAT]	59.9214	8.1626	24.86	13	1	catalytic activity; nucleotide binding	cytoplasm; endoplasmic reticulum; membrane	metabolic process	Pf00743; Pf01266; Pf07992	0.553962	0.61892	0.695964	1.11726	0.399454	1.25634	0.024779
P62755	40S ribosomal protein S6 OS=Rattus norvegicus GN=Rps6 PE=1 SV=1 - [RS6_RAT]	28.663	10.8433	24.9	2	2	structural molecule activity; protein binding	nucleus; organelle lumen; cytoplasm; ribosome; cytosol	cell organization and biogenesis; metabolic process; cell communication; regulation of biological process; response to stimulus; cell death	Pf01092	1.04887	1.47629	0.867694	1.4075	0.02743	0.827266	0.173417
O54753	17-beta-hydroxysteroid dehydrogenase type 6 OS=Rattus norvegicus GN=Hsd17b6 PE=1 SV=2 - [H17B6_RAT]	36.1216	8.73389	24.92	4	3	nucleotide binding; catalytic activity	cytoplasm; endoplasmic reticulum; membrane	metabolic process	Pf00106	0.650627	0.907377	0.744869	1.39462	0.0314704	1.14485	0.162042
F2Z3T7	Isochorismatase domain-containing protein 1 OS=Rattus norvegicus GN=Isoc1 PE=4 SV=1 - [F2Z3T7_RAT]	32.012	7.38623	24.92	6	4	catalytic activity		metabolic process	Pf00857	0.893894	0.830202	0.877392	0.928747	0.774477	0.981539	0.997324
Q58EJ9	MOSC domain-containing protein 1, mitochondrial OS=Danio rerio GN=mosc1 PE=2 SV=1 - [MOSC1_DANRE]	36.6929	6.72705	24.92	6	2	catalytic activity; metal ion binding	cytoplasm; mitochondrion	metabolic process	Pf03473; Pf03476	1.15675	1.21842	1.11211	1.05331	0.620736	0.961406	0.866632
F1QUJ7	Uncharacterized protein (Fragment) OS=Danio rerio GN=cyp2ad2 PE=2 SV=1 - [F1QUJ7_DANRE]	54.7525	8.60205	24.95	10	7	catalytic activity; metal ion binding	membrane	metabolic process	Pf00067	1.04864	0.907635	1.09301	0.865534	0.442883	1.04231	0.586831
P12785	Fatty acid synthase OS=Rattus norvegicus GN=Fasn PE=1 SV=3 - [FAS_RAT]	272.478	6.39209	24.99	46	1	nucleotide binding; catalytic activity; protein binding; metal ion binding	cytoplasm; mitochondrion; Golgi; membrane	metabolic process	Pf00106; Pf00107; Pf00108; Pf00109; Pf00698; Pf00975; Pf02801; Pf08242; Pf08659; Pf12847	0.599964	0.537353	0.547038	0.895641	0.59327	0.911784	0.556004
B5DEP7	Protein LOC100360635 OS=Rattus norvegicus GN=LOC100360635 PE=4 SV=1 - [B5DEP7_RAT]	8.49043	8.88037	25	2	4				Pf01423	1.09213	0.776795	1.28778	0.711268	0.0351807	1.17915	0.0954837
Q62658	Peptidyl-prolyl cis-trans isomerase FKBP1A OS=Rattus norvegicus GN=Fkbp1a PE=1 SV=3 - [FKB1A_RAT]	11.9151	8.1626	25	2	2	catalytic activity; signal transducer activity; protein binding	cytoplasm; cytosol; membrane; endoplasmic reticulum	metabolic process; regulation of biological process; development; cell communication; cell organization and biogenesis; response to stimulus; cell proliferation; cellular homeostasis; transport	Pf00254	0.398833	0.493679	0.370023	1.23781	0.147832	0.927765	0.652131
Q6P016	Purine nucleoside phosphorylase OS=Danio rerio GN=pnp4b PE=2 SV=1 - [Q6P016_DANRE]	33.7647	7.03467	25	4	4	catalytic activity		metabolic process	Pf01048	0.987175	0.985061	0.992391	0.997858	0.860561	1.00528	0.830615
B8JIS1	Uncharacterized protein OS=Danio rerio GN=atp5f1 PE=4 SV=1 - [B8JIS1_DANRE]	28.1518	9.34912	25	6	2	transporter activity	cytoplasm; membrane; mitochondrion	metabolic process; transport	Pf05405	1.24373	1.11908	1.14654	0.899779	0.615201	0.92186	0.616014
Q6TLF6	Regucalcin OS=Danio rerio GN=rgn PE=2 SV=1 - [RGN_DANRE]	32.7882	5.59229	25.08	7	1	catalytic activity; metal ion binding; enzyme regulator activity	nucleus; cytoplasm	cellular homeostasis; metabolic process; regulation of biological process; cell communication; response to stimulus	Pf08450	0.806492	1.18182	0.957692	1.46538	0.0145608	1.18748	0.083398
B5DFC1	Vps35 protein (Fragment) OS=Rattus norvegicus GN=Vps35 PE=2 SV=1 - [B5DFC1_RAT]	72.3509	5.2876	25.12	13	5		cytoplasm; endosome; cytosol		Pf03635	0.722611	0.768669	0.697086	1.06374	0.580314	0.964677	0.887898
F1AGC0	Rac-1 (Fragment) OS=Schmidtea mediterranea PE=2 SV=1 - [F1AGC0_SCHMD]	18.5774	5.88428	25.15	3	1	nucleotide binding	membrane	cell communication; regulation of biological process; response to stimulus	Pf00071; Pf08477	2.09205	2.08773	2.20835	0.997934	0.860211	1.05559	0.510044
A8E526	Rpl14 protein OS=Danio rerio GN=rpl14 PE=2 SV=1 - [A8E526_DANRE]	16.1179	10.3306	25.18	2	2	structural molecule activity	cytoplasm; ribosome	metabolic process	Pf01929	0.915226	0.938561	0.973219	1.0255	0.736212	1.06336	0.468078
A4V6K2	PRM10 protein (Fragment) OS=Dugesia japonica PE=2 SV=1 - [A4V6K2_DUGJA]	36.6638	5.42725	25.23	8	1	nucleotide binding			Pf00076	1.86315	1.64167	1.93534	0.881126	0.518568	1.03875	0.608489
Q6XG62	Ictacalcin OS=Danio rerio GN=icn PE=4 SV=1 - [Q6XG62_DANRE]	10.4002	5.21143	25.26	2	3	metal ion binding			Pf01023	1.14073	0.866175	1.0214	0.759318	0.0968382	0.895395	0.463663
P21670	Proteasome subunit alpha type-4 OS=Rattus norvegicus GN=Psma4 PE=1 SV=1 - [PSA4_RAT]	29.4792	7.72314	25.29	6	3	catalytic activity	proteasome; nucleus; cytoplasm	metabolic process	Pf00227; Pf10584	0.922632	0.924376	0.728824	1.00189	0.841906	0.78994	0.0839945
G3V872	Glutamic pyruvate transaminase (Alanine aminotransferase) 2 (Predicted), isoform CRA_b OS=Rattus norvegicus GN=Gpt2 PE=4 SV=1 - [G3V872_RAT]	57.8045	8.22119	25.29	8	2	catalytic activity	cytoplasm; mitochondrion	metabolic process	Pf00155	0.93488	0.924434	0.954139	0.988827	0.90289	1.0206	0.725082
Q6AZW2	Alcohol dehydrogenase [NADP(+)] A OS=Danio rerio GN=akr1a1a PE=2 SV=2 - [A1A1A_DANRE]	36.7389	7.56201	25.31	8	1	catalytic activity		metabolic process	Pf00248	1.22072	1.27629	1.16032	1.04552	0.651996	0.95052	0.79612
F1QYU7	S-adenosylmethionine synthase OS=Danio rerio GN=mat2aa PE=2 SV=1 - [F1QYU7_DANRE]	43.6443	6.63916	25.32	2	6	nucleotide binding; metal ion binding; catalytic activity	cytoplasm	metabolic process	Pf00438; Pf02772; Pf02773	2.46197	2.73897	2.36548	1.11251	0.41366	0.960808	0.862747
E7F569	Uncharacterized protein OS=Danio rerio GN=sb:cb252 PE=4 SV=1 - [E7F569_DANRE]	24.1023	7.23975	25.33	3	1				Pf01965	0.992693	1.02797	0.933059	1.03554	0.693301	0.939928	0.728313
Q5RH26	Uncharacterized protein OS=Danio rerio GN=atp5c1 PE=4 SV=1 - [Q5RH26_DANRE]	32.1279	9.39307	25.34	4	2	transporter activity; catalytic activity	membrane	metabolic process; transport	Pf00231	1.18648	1.39998	1.61591	1.17994	0.244134	1.36193	0.00288205
Q8CG45	Aflatoxin B1 aldehyde reductase member 2 OS=Rattus norvegicus GN=Akr7a2 PE=1 SV=2 - [ARK72_RAT]	40.6493	8.104	25.34	6	1	catalytic activity	cytoplasm; mitochondrion; Golgi	metabolic process	Pf00248	0.498505	0.358204	0.383762	0.718556	0.0416764	0.769826	0.0532614
Q9ES38	Bile acyl-CoA synthetase OS=Rattus norvegicus GN=Slc27a5 PE=1 SV=1 - [S27A5_RAT]	76.217	8.23584	25.36	15	1	nucleotide binding; catalytic activity; transporter activity; protein binding	cytoplasm; endoplasmic reticulum; membrane	metabolic process; transport	Pf00501	0.54258	0.513873	0.537601	0.947091	0.878307	0.990823	0.934711
F1QJV7	Uncharacterized protein OS=Danio rerio GN=ddt PE=2 SV=1 - [F1QJV7_DANRE]	12.9427	7.12256	25.42	2	2				Pf01187	0.77072	0.885107	0.676923	1.14842	0.314945	0.8783	0.375663
F1QR17	Uncharacterized protein OS=Danio rerio GN=aldh7a1 PE=2 SV=1 - [F1QR17_DANRE]	59.0493	7.43018	25.51	9	2	catalytic activity		metabolic process	Pf00171	1.00969	1.02033	1.00764	1.01054	0.802438	0.997972	0.88281
Q6PFU4	Cell division cycle 42 OS=Danio rerio GN=cdc42 PE=2 SV=1 - [Q6PFU4_DANRE]	21.2581	7.15186	25.65	4	17	nucleotide binding	membrane	cell communication; regulation of biological process; response to stimulus; cell division	Pf00025; Pf00071; Pf08477	1.17859	1.01953	1.09373	0.865041	0.440577	0.928003	0.653601
D3ZD11	Protein Spcs2 OS=Rattus norvegicus GN=Spcs2 PE=4 SV=1 - [D3ZD11_RAT]	24.9577	8.57275	25.66	4	1	catalytic activity	cytoplasm; endoplasmic reticulum; membrane	metabolic process	Pf06703	1.04495	0.666025	0.641664	0.637372	0.00431048	0.614059	0.00019289
A9JRE6	Dmgdh protein (Fragment) OS=Danio rerio GN=dmgdh PE=2 SV=1 - [A9JRE6_DANRE]	97.3864	7.00537	25.71	3	1	catalytic activity	cytoplasm	metabolic process	Pf00890; Pf01266; Pf01494; Pf01571; Pf01946; Pf04268; Pf08669	1.50869	2.17738	1.42947	1.44322	0.0186115	0.947486	0.776592
G8IIK6	Heat shock protein 40 OS=Dugesia japonica PE=2 SV=1 - [G8IIK6_DUGJA]	46.1731	7.57666	25.79	9	1	nucleotide binding; metal ion binding; protein binding	cytoplasm	metabolic process; response to stimulus	Pf00226; Pf00684; Pf01556	1.90736	1.66293	2.15032	0.87185	0.472917	1.12738	0.208328
P05183	Cytochrome P450 3A2 OS=Rattus norvegicus GN=Cyp3a2 PE=1 SV=2 - [CP3A2_RAT]	57.6943	8.76318	25.79	13	8	catalytic activity; metal ion binding	cytoplasm; endoplasmic reticulum; membrane	metabolic process	Pf00067	0.675617	0.532491	0.618831	0.788156	0.159688	0.915951	0.580551
Q5PQZ9	NADH dehydrogenase [ubiquinone] 1 subunit C2 OS=Rattus norvegicus GN=Ndufc2 PE=2 SV=1 - [Q5PQZ9_RAT]	14.3493	9.39307	25.83	3	1	catalytic activity	cytoplasm; mitochondrion; membrane	metabolic process; transport	Pf06374	1.03818	0.947754	0.932682	0.912902	0.686287	0.898384	0.479961
Q499N5	Acyl-CoA synthetase family member 2, mitochondrial OS=Rattus norvegicus GN=Acsf2 PE=2 SV=1 - [ACSF2_RAT]	67.8429	8.11865	25.85	13	1	nucleotide binding; catalytic activity	cytoplasm; mitochondrion	metabolic process	Pf00501	0.887792	0.670433	0.730736	0.755169	0.0895553	0.823094	0.161075
G3V9R8	Heterogeneous nuclear ribonucleoprotein C OS=Rattus norvegicus GN=LOC100911576 PE=4 SV=1 - [G3V9R8_RAT]	34.3639	5.04639	25.88	7	3	nucleotide binding; RNA binding; protein binding	nucleus; spliceosomal complex	metabolic process	Pf00076	0.671183	0.523188	0.578464	0.779501	0.13849	0.861857	0.300201
Q641Y2	NADH dehydrogenase [ubiquinone] iron-sulfur protein 2, mitochondrial OS=Rattus norvegicus GN=Ndufs2 PE=1 SV=1 - [NDUS2_RAT]	52.5276	6.99072	25.92	7	4	catalytic activity; metal ion binding; nucleotide binding	cytoplasm; mitochondrion; membrane	transport; response to stimulus; metabolic process	Pf00346	1.24175	1.20753	1.10811	0.972439	0.981339	0.892376	0.447461
F1QV28	Uncharacterized protein OS=Danio rerio GN=tubb6 PE=3 SV=1 - [F1QV28_DANRE]	50.0581	4.84326	25.95	2	3	nucleotide binding; catalytic activity; structural molecule activity	cytoplasm; cytoskeleton	metabolic process; cellular component movement; cell organization and biogenesis	Pf00091; Pf03953; Pf10644	1.65591	1.69587	1.83142	1.02413	0.742138	1.10599	0.278526
D4A0Q0	Uncharacterized protein OS=Rattus norvegicus PE=2 SV=1 - [D4A0Q0_RAT]	14.3486	10.1841	25.98	4	3		membrane		Pf03650	0.572116	0.440054	0.404519	0.76917	0.115849	0.707059	0.00910144
Q7ZVB2	Aldehyde dehydrogenase family 9 member A1-A OS=Danio rerio GN=aldh9a1a PE=2 SV=1 - [A9A1A_DANRE]	55.2259	6.55127	25.98	11	3	catalytic activity	cytoplasm	metabolic process	Pf00171	0.844815	1.10924	0.821932	1.313	0.0726238	0.972914	0.941451
P13107	Cytochrome P450 2B3 OS=Rattus norvegicus GN=Cyp2b3 PE=2 SV=1 - [CP2B3_RAT]	56.3479	6.87354	26.07	13	3	catalytic activity; metal ion binding	cytoplasm; endoplasmic reticulum; membrane	response to stimulus; metabolic process	Pf00067	0.576212	0.48022	0.525459	0.833409	0.305212	0.91192	0.556799
D4A315	Protein LOC680058 OS=Rattus norvegicus GN=LOC680058 PE=4 SV=1 - [D4A315_RAT]	17.6572	8.60205	26.11	3	4	protein binding			Pf00241	0.852087	0.819819	0.845817	0.96213	0.963583	0.992642	0.921439
F1LW74	Protein LOC100360623 (Fragment) OS=Rattus norvegicus GN=LOC100360623 PE=4 SV=1 - [F1LW74_RAT]	103.505	5.61768	26.11	15	2	protein binding	membrane	cell communication; regulation of biological process; response to stimulus	Pf00307	1.03071	1.00304	0.980611	0.973162	0.977838	0.951398	0.801782
F1AGB2	Chaperonin-containing TCP1 theta subunit (Fragment) OS=Schmidtea mediterranea PE=2 SV=1 - [F1AGB2_SCHMD]	14.5407	5.87158	26.12	3	1	nucleotide binding; protein binding	cytoplasm; membrane	metabolic process	Pf00118	2.22292	2.12912	2.10089	0.9578	0.939084	0.945103	0.761311
D4A0T0	Protein Ndufb10 OS=Rattus norvegicus GN=Ndufb10 PE=4 SV=1 - [D4A0T0_RAT]	20.8454	7.69385	26.14	4	2		cytoplasm; mitochondrion; membrane		Pf10249	0.681793	0.744134	0.604774	1.09144	0.481051	0.887035	0.419478
Q0P3U4	Uncharacterized protein OS=Danio rerio GN=cox5b2 PE=2 SV=1 - [Q0P3U4_DANRE]	14.2992	9.0708	26.19	3	3	catalytic activity; transporter activity	cytoplasm; mitochondrion		Pf01215	1.02434	1.67861	1.05826	1.63873	0.00191647	1.03312	0.643566
F1M7N8	UDP-glucuronosyltransferase 2B37 OS=Rattus norvegicus GN=Ugt2b37 PE=2 SV=1 - [F1M7N8_RAT]	60.5672	8.67529	26.23	5	16	catalytic activity	cytoplasm; endoplasmic reticulum; membrane	metabolic process	Pf00201; Pf04101	1.13265	1.07826	1.06337	0.951981	0.906075	0.938836	0.721389
P00388	NADPH--cytochrome P450 reductase OS=Rattus norvegicus GN=Por PE=1 SV=3 - [NCPR_RAT]	76.9142	5.47803	26.25	14	4	catalytic activity; metal ion binding; nucleotide binding; protein binding	cytoplasm; mitochondrion; endoplasmic reticulum; membrane	cell proliferation; development; regulation of biological process; response to stimulus; metabolic process; cell differentiation; cell death; cell communication	Pf00175; Pf00258; Pf00667	0.684834	0.634327	0.619867	0.926249	0.760448	0.905134	0.517685
D4A640	Proteasome subunit beta type OS=Rattus norvegicus GN=Psmb4 PE=2 SV=1 - [D4A640_RAT]	25.7438	6.34131	26.29	4	3	catalytic activity	proteasome; nucleus; cytoplasm; membrane	metabolic process	Pf00227	1.1054	1.03089	1.00866	0.93259	0.79613	0.912479	0.560068
P62076	Mitochondrial import inner membrane translocase subunit Tim13 OS=Rattus norvegicus GN=Timm13 PE=3 SV=1 - [TIM13_RAT]	10.4509	8.17725	26.32	2	2	metal ion binding	cytoplasm; mitochondrion; membrane	cell organization and biogenesis; transport	Pf02953	0.698025	0.747545	0.537762	1.07094	0.553348	0.770405	0.0540015
P06640	Hemoglobin subunit alpha-2 (Fragment) OS=Pleurodeles waltl PE=2 SV=1 - [HBA2_PLEWA]	14.9054	7.03467	26.32	3	2	transporter activity; metal ion binding	cytoplasm; cytosol	transport	Pf00042	0.533126	0.792343	0.819834	1.48622	0.0115219	1.53779	4.38212e-05
F1RBV5	Uncharacterized protein (Fragment) OS=Danio rerio GN=wu:fd14a01 PE=4 SV=1 - [F1RBV5_DANRE]	221.56	5.78271	26.34	2	7	nucleotide binding; catalytic activity; motor activity; protein binding	chromosome; nucleus; organelle lumen; cytoplasm; cytoskeleton; membrane	cell organization and biogenesis; metabolic process; reproduction	Pf00038; Pf00063; Pf01576; Pf02463; Pf02736; Pf04111; Pf05483; Pf05557; Pf05622; Pf05667; Pf06160; Pf07697; Pf07888; Pf08317; Pf09726; Pf10174; Pf12128	0.378723	0.557694	0.838998	1.47257	0.0134363	2.21534	1.24354e-13
F1M396	Protein Erp44 (Fragment) OS=Rattus norvegicus GN=Erp44 PE=2 SV=1 - [F1M396_RAT]	46.7253	5.32568	26.35	6	2	metal ion binding		cellular homeostasis; regulation of biological process	Pf00085; Pf01216; Pf07449	0.668559	0.623654	0.612055	0.932835	0.79751	0.915485	0.577787
Q63524	Transmembrane emp24 domain-containing protein 2 OS=Rattus norvegicus GN=Tmed2 PE=1 SV=1 - [TMED2_RAT]	22.7183	5.17334	26.37	5	4	protein binding	cytoplasm; endoplasmic reticulum; membrane; Golgi	development; transport; cell organization and biogenesis; metabolic process; regulation of biological process	Pf01105	0.474942	0.509924	0.396237	1.07366	0.543395	0.834286	0.195593
Q6TXG7	Serine hydroxymethyltransferase OS=Rattus norvegicus GN=Shmt1 PE=2 SV=1 - [Q6TXG7_RAT]	75.3262	7.92822	26.43	10	2	catalytic activity; protein binding	nucleus; cytoplasm; mitochondrion; cytosol	metabolic process; cell organization and biogenesis	Pf00464	0.657021	0.618492	0.679402	0.941358	0.845763	1.03406	0.637594
P17178	Sterol 26-hydroxylase, mitochondrial OS=Rattus norvegicus GN=Cyp27a1 PE=1 SV=1 - [CP27A_RAT]	60.6947	9.12939	26.45	11	1	catalytic activity; metal ion binding	cytoplasm; mitochondrion; membrane	metabolic process	Pf00067	0.685351	0.730046	0.583509	1.06522	0.574719	0.851402	0.257246
I3IS20	Cytochrome b-c1 complex subunit 7 OS=Danio rerio GN=uqcrb PE=3 SV=1 - [I3IS20_DANRE]	9.78905	6.16357	26.58	2	2	catalytic activity; transporter activity		metabolic process	Pf02271	1.04853	1.08725	1.07413	1.03693	0.687458	1.02442	0.699721
F1QV62	Uncharacterized protein (Fragment) OS=Danio rerio GN=oat PE=3 SV=1 - [F1QV62_DANRE]	48.5989	7.02002	26.58	7	2	catalytic activity	membrane	metabolic process	Pf00202	0.930529	0.831606	0.866712	0.893692	0.58303	0.931419	0.674787
Q6PC53	Peptidyl-prolyl cis-trans isomerase OS=Danio rerio GN=ppiab PE=2 SV=1 - [Q6PC53_DANRE]	17.4776	8.07471	26.83	3	8	catalytic activity		metabolic process; response to stimulus	Pf00160	1.05899	1.12443	1.13212	1.06179	0.587728	1.06905	0.438823
Q499R7	Ppa1 protein (Fragment) OS=Rattus norvegicus GN=Ppa1 PE=2 SV=1 - [Q499R7_RAT]	37.6528	6.84424	26.89	6	1	metal ion binding; catalytic activity	cytoplasm	metabolic process	Pf00719	0.805627	0.810909	0.829751	1.00656	0.820521	1.02994	0.663785
A2AWA1	Uncharacterized protein OS=Danio rerio GN=ddx39aa PE=2 SV=1 - [A2AWA1_DANRE]	48.9018	5.59229	26.93	3	6	catalytic activity; nucleotide binding			Pf00270; Pf00271	1.20744	1.02729	0.955643	0.850802	0.376463	0.791464	0.0867762
F1QJP3	Uncharacterized protein OS=Danio rerio GN=myl10 PE=2 SV=1 - [F1QJP3_DANRE]	18.9273	4.729	26.95	3	6	metal ion binding				0.558276	0.749887	0.820669	1.34322	0.0536718	1.47001	0.000237205
D3ZS68	Protein Pcbp1 OS=Rattus norvegicus GN=Pcbp1 PE=4 SV=1 - [D3ZS68_RAT]	37.4739	7.09326	26.97	5	3	DNA binding; RNA binding			Pf00013	0.468135	0.492466	0.414964	1.05197	0.62605	0.886418	0.416302
F1M835	Carbonyl reductase family member 4 (Fragment) OS=Rattus norvegicus GN=Cbr4 PE=2 SV=1 - [F1M835_RAT]	20.4409	9.30518	26.98	3	2	nucleotide binding; catalytic activity	cytoplasm; mitochondrion	metabolic process; cell organization and biogenesis	Pf00106; Pf08659	0.837082	0.844681	0.910157	1.00908	0.809061	1.0873	0.353216
D4AC23	Protein Cct7 OS=Rattus norvegicus GN=Cct7 PE=3 SV=1 - [D4AC23_RAT]	59.6202	8.00146	27.02	8	1	nucleotide binding; protein binding	cytoplasm; mitochondrion; cytosol; cytoskeleton	metabolic process	Pf00118	0.617893	0.665235	0.642207	1.07662	0.532664	1.03935	0.604807
Q562C4	Methyltransferase-like protein 7B OS=Rattus norvegicus GN=Mettl7b PE=1 SV=1 - [MET7B_RAT]	27.8855	8.27979	27.05	6	1	catalytic activity	cytoplasm; endoplasmic reticulum; membrane	metabolic process	Pf01209; Pf01739; Pf03848; Pf05148; Pf08241; Pf08242; Pf12847	0.60454	0.541027	0.502597	0.894941	0.589585	0.831371	0.186169
Q4V797	Interferon-gamma-inducible GTPase Ifgga1 protein OS=Rattus norvegicus GN=RGD1309362 PE=2 SV=1 - [Q4V797_RAT]	48.241	7.47412	27.1	6	1	nucleotide binding; catalytic activity	membrane		Pf05049	0.946966	1.16522	0.784693	1.23048	0.157897	0.828639	0.177612
A9JTB3	Acyl-Coenzyme A dehydrogenase, C-4 to C-12 straight chain OS=Danio rerio GN=acadm PE=2 SV=1 - [A9JTB3_DANRE]	46.0892	8.04541	27.12	7	6	catalytic activity		metabolic process	Pf00441; Pf02770; Pf02771; Pf08028; Pf11794	1.18762	1.34023	1.22214	1.1285	0.367222	1.02907	0.669442
Q7T2J4	Alcohol dehydrogenase 8b OS=Danio rerio GN=adh8b PE=2 SV=1 - [Q7T2J4_DANRE]	40.7978	7.62061	27.13	6	1	nucleotide binding; catalytic activity; metal ion binding		metabolic process	Pf00107; Pf08240	1.06156	0.833344	0.980688	0.78502	0.151767	0.92382	0.627929
D4AD70	Protein RGD1561636 OS=Rattus norvegicus GN=RGD1561636 PE=3 SV=1 - [D4AD70_RAT]	8.24076	10.0962	27.14	3	4	structural molecule activity	cytoplasm; ribosome	metabolic process	Pf01781	0.930271	0.807511	0.943487	0.868038	0.454686	1.01421	0.76844
Q7ZW95	Ribosomal protein L4 OS=Danio rerio GN=rpl4 PE=2 SV=1 - [Q7ZW95_DANRE]	42.5251	11.1216	27.2	9	3	structural molecule activity	cytoplasm; ribosome	metabolic process	Pf00573	1.07427	1.4272	0.945376	1.32854	0.0622344	0.88002	0.384091
Q68FR6	Elongation factor 1-gamma OS=Rattus norvegicus GN=Eef1g PE=1 SV=3 - [EF1G_RAT]	50.0292	6.7417	27.23	10	4	RNA binding; protein binding	cytoplasm	metabolic process; response to stimulus	Pf00043; Pf00647; Pf02798	0.496857	0.498787	0.445657	1.00388	0.832741	0.896953	0.472122
P09895	60S ribosomal protein L5 OS=Rattus norvegicus GN=Rpl5 PE=1 SV=3 - [RL5_RAT]	34.4367	9.74463	27.27	4	3	RNA binding; structural molecule activity	nucleus; organelle lumen; cytoplasm; ribosome	metabolic process; regulation of biological process; response to stimulus	Pf00861	1.19359	1.10856	1.14917	0.928756	0.774526	0.96278	0.875559
E9PSX6	Sarcoplasmic/endoplasmic reticulum calcium ATPase 2 OS=Rattus norvegicus GN=Atp2a2 PE=2 SV=1 - [E9PSX6_RAT]	109.434	5.52881	27.28	8	7	nucleotide binding; catalytic activity; transporter activity; metal ion binding	membrane	metabolic process; transport	Pf00122; Pf00689; Pf00690; Pf00702; Pf08282; Pf12710	0.476311	0.542851	0.555945	1.1397	0.337092	1.16719	0.11542
Q6P6R2	Dihydrolipoyl dehydrogenase, mitochondrial OS=Rattus norvegicus GN=Dld PE=1 SV=1 - [DLDH_RAT]	54.0041	7.86963	27.31	8	2	catalytic activity; nucleotide binding	nucleus; organelle lumen; cytoplasm; mitochondrion; vacuole	metabolic process; development; cellular homeostasis; regulation of biological process; cell differentiation; reproduction	Pf00070; Pf00890; Pf01134; Pf01946; Pf02852; Pf03486; Pf07992; Pf12831	0.69505	0.568695	0.597691	0.818207	0.249779	0.859925	0.291963
Q08C97	Zgc:153353 OS=Danio rerio GN=agmat PE=2 SV=1 - [Q08C97_DANRE]	39.388	7.56201	27.32	2	1	catalytic activity; metal ion binding			Pf00491	1.32338	1.17599	1.14988	0.888622	0.556686	0.868899	0.331358
P40112	Proteasome subunit beta type-3 OS=Rattus norvegicus GN=Psmb3 PE=1 SV=1 - [PSB3_RAT]	22.9494	6.55127	27.32	3	3	catalytic activity	proteasome; nucleus; cytoplasm	metabolic process	Pf00227	0.743724	0.686846	0.713678	0.923523	0.745179	0.959601	0.854904
Q7ZUJ8	Proteasome subunit beta type OS=Danio rerio GN=psmb3 PE=2 SV=1 - [Q7ZUJ8_DANRE]	23.0965	5.46533	27.32	3	1	catalytic activity	proteasome; nucleus; cytoplasm	metabolic process	Pf00227	1.51231	1.3621	1.47501	0.900675	0.619985	0.975339	0.957195
A7MBU9	Uncharacterized protein OS=Danio rerio GN=cmbl PE=2 SV=1 - [A7MBU9_DANRE]	28.0522	5.71924	27.46	5	1	catalytic activity		metabolic process	Pf00326; Pf00561; Pf01738; Pf12695; Pf12697	0.928812	1.16372	1.04371	1.25291	0.128813	1.1237	0.219302
Q63413	Spliceosome RNA helicase Ddx39b OS=Rattus norvegicus GN=Ddx39b PE=1 SV=3 - [DX39B_RAT]	49.004	5.66846	27.57	3	3	nucleotide binding; RNA binding; catalytic activity; protein binding	nucleus; spliceosomal complex; cytoplasm; organelle lumen	cell organization and biogenesis; metabolic process; transport; reproduction	Pf00270; Pf00271	1.45692	1.2593	1.28505	0.864352	0.437365	0.882033	0.394083
Q6DGG0	Peptidyl-prolyl cis-trans isomerase D OS=Rattus norvegicus GN=Ppid PE=1 SV=3 - [PPID_RAT]	40.7398	7.1665	27.57	7	4	catalytic activity; protein binding	cytoplasm; mitochondrion; cytoskeleton	metabolic process; response to stimulus; cell death; regulation of biological process; cellular homeostasis	Pf00160; Pf00515	0.977982	0.965848	0.941683	0.987594	0.908727	0.962885	0.87624
P35565	Calnexin OS=Rattus norvegicus GN=Canx PE=1 SV=1 - [CALX_RAT]	67.2126	4.62744	27.58	15	2	metal ion binding; protein binding	cytoplasm; endoplasmic reticulum; membrane; ribosome	metabolic process; cell communication; transport	Pf00262	0.632486	0.623399	0.602055	0.985634	0.918025	0.951886	0.804934
Q7ZTH6	Hydroxyacyl-Coenzyme A dehydrogenase/3-ketoacyl-Coenzyme A thiolase/enoyl-Coenzyme A hydratase (Trifunctional protein), beta subunit OS=Danio rerio GN=hadhb PE=2 SV=1 - [Q7ZTH6_DANRE]	49.9398	9.20264	27.6	2	1	catalytic activity		metabolic process	Pf00108; Pf00109; Pf02803	1.13513	1.20749	1.19376	1.06374	0.580295	1.05164	0.532206
Q32PS5	GrpE protein homolog OS=Danio rerio GN=grpel1 PE=2 SV=1 - [Q32PS5_DANRE]	23.8615	7.89893	27.65	2	1	enzyme regulator activity; nucleotide binding; protein binding	cytoplasm; mitochondrion; organelle lumen	metabolic process; response to stimulus	Pf01025	1.21778	1.11518	1.12324	0.915747	0.701961	0.922366	0.619084
D3ZUU8	Protein Sec14l4 OS=Rattus norvegicus GN=Sec14l4 PE=4 SV=1 - [D3ZUU8_RAT]	46.9879	6.97607	27.67	8	1	transporter activity	membrane	transport	Pf00650; Pf03765	0.615	0.547159	0.582975	0.88969	0.562198	0.947927	0.779423
Q5RJR8	Leucine-rich repeat-containing protein 59 OS=Rattus norvegicus GN=Lrrc59 PE=1 SV=1 - [LRC59_RAT]	34.8477	9.5249	27.69	8	1	protein binding	cytoplasm; endoplasmic reticulum; membrane; mitochondrion; organelle lumen		Pf12799	0.379128	0.299136	0.320223	0.78901	0.161893	0.844629	0.231559
P35171	Cytochrome c oxidase subunit 7A2, mitochondrial OS=Rattus norvegicus GN=Cox7a2 PE=1 SV=1 - [CX7A2_RAT]	9.34695	10.272	27.71	2	1	catalytic activity; transporter activity	cytoplasm; mitochondrion; membrane		Pf02238	0.389141	0.395938	0.357841	1.01747	0.771443	0.919568	0.602172
Q9QX80	CArG-binding factor A OS=Rattus norvegicus GN=Hnrnpab PE=2 SV=1 - [Q9QX80_RAT]	30.8343	7.91357	27.72	5	8	nucleotide binding; DNA binding	nucleus; organelle lumen; cytoplasm	cell differentiation; cell organization and biogenesis; development; metabolic process; regulation of biological process	Pf00076; Pf08143	0.50237	0.456555	0.575774	0.908802	0.663849	1.14612	0.159039
D3ZJJ9	Protein Gldc OS=Rattus norvegicus GN=Gldc PE=2 SV=1 - [D3ZJJ9_RAT]	113.532	7.32764	27.73	16	3	catalytic activity	cytoplasm; mitochondrion	metabolic process	Pf01212; Pf02347	0.65351	0.715295	0.719903	1.09454	0.470672	1.10159	0.294924
A8WGS0	Cyb5a protein OS=Danio rerio GN=cyb5a PE=2 SV=1 - [A8WGS0_DANRE]	15.3825	4.77979	27.74	2	2	metal ion binding		response to stimulus	Pf00173	0.875163	0.930422	0.887513	1.06314	0.582587	1.01411	0.769092
P28492	Glutaminase liver isoform, mitochondrial OS=Rattus norvegicus GN=Gls2 PE=2 SV=3 - [GLSL_RAT]	66.205	7.41553	27.74	13	7	catalytic activity; protein binding	cytoplasm; mitochondrion; organelle lumen	metabolic process; cell death; regulation of biological process	Pf00023; Pf04960; Pf12796	0.803942	0.665569	0.713381	0.827883	0.284306	0.887354	0.421126
H0WF64	Uncharacterized protein OS=Danio rerio GN=si:ch211-247m23.1 PE=4 SV=1 - [H0WF64_DANRE]	73.0109	6.354	27.78	12	2	catalytic activity	membrane	metabolic process	Pf00128; Pf02806; Pf02922	1.13533	1.15475	1.10156	1.01711	0.773039	0.970257	0.924186
Q6DEG3	Kmo protein (Fragment) OS=Danio rerio GN=kmo PE=2 SV=1 - [Q6DEG3_DANRE]	53.7693	8.99756	27.81	10	5	catalytic activity	cytoplasm; mitochondrion; membrane	metabolic process	Pf01266; Pf01494	1.13738	1.15885	1.0059	1.01887	0.765225	0.884396	0.40598
Q9PVK4	L-lactate dehydrogenase B-A chain OS=Danio rerio GN=ldhba PE=2 SV=4 - [LDHBA_DANRE]	36.224	6.88818	27.84	3	2	nucleotide binding; catalytic activity	cytoplasm	metabolic process	Pf00056; Pf02866	1.14204	1.11031	0.922685	0.972216	0.982417	0.807926	0.121341
P06685	Sodium/potassium-transporting ATPase subunit alpha-1 OS=Rattus norvegicus GN=Atp1a1 PE=1 SV=1 - [AT1A1_RAT]	112.982	5.45264	27.86	10	17	nucleotide binding; catalytic activity; transporter activity; protein binding; metal ion binding	cytoplasm; endosome; endoplasmic reticulum; Golgi; membrane	regulation of biological process; transport; metabolic process; response to stimulus; cellular homeostasis; cellular component movement	Pf00122; Pf00689; Pf00690; Pf00702; Pf08282; Pf12710	1.12989	1.16473	1.13367	1.03084	0.713208	1.00334	0.844361
D3ZBL9	Protein RGD1304704 OS=Rattus norvegicus GN=RGD1304704 PE=4 SV=1 - [D3ZBL9_RAT]	28.1527	6.88818	27.87	5	4	protein binding	nucleus; organelle lumen	metabolic process; regulation of biological process	Pf10036	0.832941	0.936067	0.933416	1.12381	0.380441	1.12063	0.228813
Q0QEW8	60S ribosomal protein L18 (Fragment) OS=Rattus norvegicus GN=Rpl18 PE=2 SV=1 - [Q0QEW8_RAT]	18.8587	11.8833	27.88	3	3	structural molecule activity	cytoplasm; ribosome; cytosol	metabolic process	Pf00828	0.643637	0.797662	0.53444	1.2393	0.145851	0.830343	0.182917
P09606	Glutamine synthetase OS=Rattus norvegicus GN=Glul PE=1 SV=3 - [GLNA_RAT]	42.2403	7.07861	27.88	4	7	nucleotide binding; metal ion binding; catalytic activity; protein binding	cytoplasm; mitochondrion; endoplasmic reticulum	metabolic process; cell proliferation; response to stimulus; cell communication; regulation of biological process; transport; cell organization and biogenesis	Pf00120; Pf03951	0.88109	0.822632	0.783592	0.933653	0.802132	0.889343	0.431465
Q641Y0	Dolichyl-diphosphooligosaccharide--protein glycosyltransferase 48 kDa subunit OS=Rattus norvegicus GN=Ddost PE=2 SV=1 - [OST48_RAT]	48.865	5.97314	27.89	7	4	catalytic activity	cytoplasm; endoplasmic reticulum; membrane	metabolic process; response to stimulus	Pf03345	0.483498	0.484851	0.496154	1.0028	0.837729	1.02617	0.688211
P32089	Tricarboxylate transport protein, mitochondrial OS=Rattus norvegicus GN=Slc25a1 PE=1 SV=1 - [TXTP_RAT]	33.8138	9.86182	27.97	5	3	transporter activity	cytoplasm; mitochondrion; membrane	transport	Pf00153	0.777694	0.732167	0.587155	0.941459	0.846333	0.754995	0.0368625
F1QQ15	Transaldolase (Fragment) OS=Danio rerio GN=taldo1 PE=2 SV=1 - [F1QQ15_DANRE]	37.4333	6.94678	28.01	10	3	catalytic activity	cytoplasm; membrane	metabolic process	Pf00923	1.12926	1.14252	1.08328	1.01174	0.797022	0.959284	0.852848
P21531	60S ribosomal protein L3 OS=Rattus norvegicus GN=Rpl3 PE=1 SV=3 - [RL3_RAT]	46.1068	10.2134	28.04	4	2	structural molecule activity	nucleus; organelle lumen; cytoplasm; ribosome; cytosol	metabolic process	Pf00297	0.716498	0.629284	0.680561	0.878277	0.50436	0.949844	0.791758
E9QCI4	Uncharacterized protein OS=Danio rerio GN=zgc:65987 PE=3 SV=1 - [E9QCI4_DANRE]	25.5906	9.87646	28.22	6	5	nucleotide binding; catalytic activity		metabolic process	Pf00106; Pf08659	1.23175	1.40428	1.18408	1.14006	0.336144	0.961296	0.865918
Q6PBW4	Peptidyl-prolyl cis-trans isomerase OS=Danio rerio GN=ppib PE=2 SV=1 - [Q6PBW4_DANRE]	23.9135	9.21729	28.24	3	8	catalytic activity		metabolic process	Pf00160	1.83669	1.44626	1.80643	0.787427	0.157823	0.983528	0.988356
P10786	Hemoglobin subunit beta-2 OS=Triturus cristatus GN=HBB2 PE=1 SV=1 - [HBB2_TRICR]	16.2074	8.104	28.28	4	1	transporter activity; metal ion binding	cytoplasm; cytosol	transport	Pf00042	0.520978	0.738989	0.761654	1.41847	0.0243781	1.46197	0.00028811
D3ZJM9	Glutathione S-transferase omega-1 OS=Rattus norvegicus GN=Gsto1 PE=2 SV=1 - [D3ZJM9_RAT]	27.5029	6.30322	28.33	5	4	catalytic activity; protein binding	cytoplasm; membrane	metabolic process	Pf00043; Pf02798	0.801443	0.928763	0.774376	1.15886	0.289901	0.966227	0.897979
D3ZG43	NADH dehydrogenase (Ubiquinone) Fe-S protein 3 (Predicted), isoform CRA_c OS=Rattus norvegicus GN=Ndufs3 PE=3 SV=1 - [D3ZG43_RAT]	30.2076	7.53271	28.41	6	3	catalytic activity	cytoplasm; mitochondrion; membrane	transport; cell death; regulation of biological process; metabolic process; cell growth; cell organization and biogenesis	Pf00329	0.704418	0.723125	0.714841	1.02656	0.73162	1.0148	0.764394
Q6P2V4	Hgd protein OS=Danio rerio GN=hgd PE=2 SV=1 - [Q6P2V4_DANRE]	49.8519	6.65381	28.44	8	3	catalytic activity		metabolic process	Pf04209	1.02286	1.05764	1.00729	1.03401	0.699761	0.984779	0.97912
Q62651	Delta(3,5)-Delta(2,4)-dienoyl-CoA isomerase, mitochondrial OS=Rattus norvegicus GN=Ech1 PE=1 SV=2 - [ECH1_RAT]	36.1484	7.98682	28.44	9	1	catalytic activity; protein binding; metal ion binding	cytoplasm; mitochondrion	metabolic process	Pf00378	0.667837	0.869155	0.662418	1.30145	0.0813233	0.991885	0.926958
P14882	Propionyl-CoA carboxylase alpha chain, mitochondrial OS=Rattus norvegicus GN=Pcca PE=1 SV=3 - [PCCA_RAT]	81.5711	7.69385	28.49	9	3	nucleotide binding; catalytic activity; metal ion binding	extracellular; cytoplasm; mitochondrion; organelle lumen	metabolic process	Pf00289; Pf00364; Pf01071; Pf02222; Pf02258; Pf02785; Pf02786; Pf07478	0.91294	0.893049	0.580223	0.978212	0.953491	0.635554	0.000550469
G3V6E1	Myosin-4 OS=Rattus norvegicus GN=Myh4 PE=4 SV=1 - [G3V6E1_RAT]	223.183	5.77002	28.53	2	12	nucleotide binding; catalytic activity; motor activity; protein binding	nucleus; organelle lumen; cytoplasm; Golgi; cytoskeleton; membrane	cell organization and biogenesis; response to stimulus	Pf00038; Pf00063; Pf01576; Pf02463; Pf02736; Pf04156; Pf05557; Pf05622; Pf05667; Pf05701; Pf07888; Pf08317; Pf09726; Pf12128	1.7842	1.58113	1.80703	0.886184	0.544179	1.01279	0.778155
Q68FP2	Serum paraoxonase/lactonase 3 OS=Rattus norvegicus GN=Pon3 PE=2 SV=1 - [PON3_RAT]	39.4332	5.8335	28.53	7	1	catalytic activity; protein binding; metal ion binding	extracellular	metabolic process; response to stimulus	Pf01731; Pf03088	0.404491	0.335022	0.307249	0.828256	0.285693	0.759593	0.0414433
P80432	Cytochrome c oxidase subunit 7C, mitochondrial OS=Rattus norvegicus GN=Cox7c PE=1 SV=2 - [COX7C_RAT]	7.36993	11.0044	28.57	2	2	catalytic activity; transporter activity	cytoplasm; mitochondrion; membrane		Pf02935	0.742763	0.594698	0.677408	0.800657	0.194019	0.912011	0.557331
Q3T1J1	Eukaryotic translation initiation factor 5A-1 OS=Rattus norvegicus GN=Eif5a PE=1 SV=3 - [IF5A1_RAT]	16.8214	5.23682	28.57	2	4	RNA binding; protein binding	nucleus; membrane; cytoplasm; endoplasmic reticulum	transport; metabolic process; cell death; regulation of biological process; cell proliferation; cell organization and biogenesis; cell differentiation	Pf01287	0.579203	0.495247	0.554843	0.855049	0.395067	0.957942	0.844136
Q9R1Z0	Voltage-dependent anion-selective channel protein 3 OS=Rattus norvegicus GN=Vdac3 PE=1 SV=2 - [VDAC3_RAT]	30.7784	8.70459	28.62	4	3	nucleotide binding; transporter activity	cytoplasm; mitochondrion; membrane; endoplasmic reticulum	defense response; response to stimulus; transport; cell communication; regulation of biological process	Pf01459	0.84881	0.74776	0.813284	0.880951	0.517691	0.958146	0.845462
Q3MIE0	Enoyl-CoA hydratase domain-containing protein 3, mitochondrial OS=Rattus norvegicus GN=Echdc3 PE=2 SV=1 - [ECHD3_RAT]	32.3649	8.57275	28.67	7	1	catalytic activity	cytoplasm; mitochondrion	metabolic process	Pf00378	0.645743	0.59459	0.601147	0.920785	0.729903	0.930939	0.671796
G3V7I5	Aldehyde dehydrogenase X, mitochondrial OS=Rattus norvegicus GN=Aldh1b1 PE=3 SV=1 - [G3V7I5_RAT]	57.6224	7.06396	28.71	8	2	catalytic activity		metabolic process	Pf00171; Pf05893	0.486063	0.505111	0.551101	1.03919	0.678045	1.1338	0.190218
Q64565	Alanine--glyoxylate aminotransferase 2, mitochondrial OS=Rattus norvegicus GN=Agxt2 PE=1 SV=2 - [AGT2_RAT]	57.1637	8.07471	28.71	13	3	catalytic activity	cytoplasm; mitochondrion; organelle lumen	metabolic process; regulation of biological process	Pf00155; Pf00202	0.444692	0.477776	0.415827	1.0744	0.540691	0.93509	0.697756
E7EY13	Choline dehydrogenase OS=Danio rerio GN=chdh PE=3 SV=1 - [E7EY13_DANRE]	65.2357	7.88428	28.72	8	1	catalytic activity		metabolic process	Pf00732; Pf05199; Pf05834	1.31576	1.47199	1.36957	1.11874	0.395108	1.04089	0.595391
D1GJ91	Mortalin-like protein OS=Dugesia japonica GN=mot PE=2 SV=1 - [D1GJ91_DUGJA]	74.6896	6.82959	28.82	5	1	nucleotide binding; catalytic activity; protein binding		cell organization and biogenesis; metabolic process	Pf00012; Pf01968; Pf06723	1.94712	1.79785	2.1693	0.923337	0.744144	1.1141	0.25004
P97584	Prostaglandin reductase 1 OS=Rattus norvegicus GN=Ptgr1 PE=2 SV=3 - [PTGR1_RAT]	35.6954	8.01611	28.88	7	1	nucleotide binding; metal ion binding; catalytic activity	cytoplasm	metabolic process; response to stimulus	Pf00107	0.617371	0.552533	0.565477	0.894978	0.589782	0.915945	0.580516
Q5BJZ3	Nicotinamide nucleotide transhydrogenase OS=Rattus norvegicus GN=Nnt PE=2 SV=1 - [Q5BJZ3_RAT]	113.796	7.88428	29.01	26	2	catalytic activity; nucleotide binding	cytoplasm; mitochondrion; membrane	transport; metabolic process	Pf01262; Pf02233; Pf05222; Pf12769	0.776445	0.89125	0.757141	1.14786	0.316325	0.975138	0.955891
G3V6S2	Cytoplasmic aconitate hydratase OS=Rattus norvegicus GN=Aco1 PE=4 SV=1 - [G3V6S2_RAT]	98.1304	7.38623	29.02	14	3			metabolic process	Pf00330; Pf00694	0.7973	0.68711	0.817865	0.861797	0.425539	1.02579	0.690699
D3ZRV7	Protein LOC100359636 OS=Rattus norvegicus GN=LOC100359636 PE=4 SV=1 - [D3ZRV7_RAT]	12.4826	10.3599	29.09	4	10	structural molecule activity	cytoplasm; ribosome	metabolic process	Pf01247	1.07296	0.873638	1.0573	0.814232	0.236373	0.985404	0.974507
P62193	26S protease regulatory subunit 4 OS=Rattus norvegicus GN=Psmc1 PE=2 SV=1 - [PRS4_RAT]	49.1537	6.21436	29.09	10	5	nucleotide binding; catalytic activity; RNA binding; protein binding	proteasome; nucleus; organelle lumen; cytoplasm	metabolic process; response to stimulus	Pf00004; Pf00910; Pf01078; Pf05496; Pf05673; Pf05729; Pf06068; Pf07724; Pf07726; Pf07728; Pf10146	1.2475	1.2104	1.2822	0.970261	0.991891	1.02782	0.677512
P06866	Haptoglobin OS=Rattus norvegicus GN=Hp PE=1 SV=3 - [HPT_RAT]	38.5385	6.53662	29.11	10	1	catalytic activity; protein binding	extracellular; cytoplasm; endoplasmic reticulum; Golgi	response to stimulus; development; defense response; metabolic process; reproduction; cell death; regulation of biological process	Pf00084; Pf00089	0.435501	0.301217	0.32336	0.691655	0.021619	0.742501	0.0264323
B0UXL2	Uncharacterized protein OS=Danio rerio GN=idh1 PE=4 SV=1 - [B0UXL2_DANRE]	48.4734	7.75244	29.14	7	4	metal ion binding; catalytic activity; nucleotide binding		metabolic process	Pf00180	1.04282	1.21812	1.20141	1.16811	0.269061	1.15209	0.145491
Q6P136	Hyou1 protein OS=Rattus norvegicus GN=Hyou1 PE=2 SV=1 - [Q6P136_RAT]	111.151	5.18604	29.16	20	3	nucleotide binding	cytoplasm; endoplasmic reticulum; organelle lumen	response to stimulus	Pf00012	0.593736	0.545126	0.588438	0.918128	0.715141	0.991076	0.932867
Q6AYS7	Aminoacylase-1A OS=Rattus norvegicus GN=Acy1a PE=1 SV=1 - [ACY1A_RAT]	45.7751	6.48096	29.17	11	2	catalytic activity; metal ion binding	cytoplasm	metabolic process	Pf01546; Pf07687	1.15785	1.94886	1.11771	1.68317	0.00111107	0.965332	0.892153
Q6NV30	Calr protein OS=Danio rerio GN=calr PE=2 SV=1 - [Q6NV30_DANRE]	48.5259	4.52588	29.19	7	8	metal ion binding; protein binding	cytoplasm; endoplasmic reticulum	metabolic process	Pf00262	1.36183	1.20808	1.37826	0.887098	0.548854	1.01207	0.783179
G3V6C2	Protein Hgd OS=Rattus norvegicus GN=Hgd PE=4 SV=1 - [G3V6C2_RAT]	49.8575	7.09326	29.21	9	2	catalytic activity		metabolic process	Pf04209	0.733024	0.74869	0.741235	1.02137	0.754205	1.0112	0.789171
P83732	60S ribosomal protein L24 OS=Rattus norvegicus GN=Rpl24 PE=1 SV=1 - [RL24_RAT]	17.7679	11.2534	29.3	2	1	structural molecule activity	cytoplasm; ribosome; cytosol	cell organization and biogenesis; metabolic process; development; cell differentiation; response to stimulus; regulation of biological process	Pf01246	0.469112	0.439708	0.430187	0.93732	0.822872	0.917024	0.586938
P19511	ATP synthase subunit b, mitochondrial OS=Rattus norvegicus GN=Atp5f1 PE=1 SV=1 - [AT5F1_RAT]	28.8505	9.36377	29.3	8	1	transporter activity; catalytic activity	cytoplasm; membrane; mitochondrion	metabolic process; transport	Pf05405	0.410504	0.315239	0.373306	0.767932	0.113324	0.909385	0.542053
A8KB78	Uncharacterized protein OS=Danio rerio GN=rps23 PE=2 SV=1 - [A8KB78_DANRE]	15.8387	10.4917	29.37	5	3	structural molecule activity	cytoplasm; ribosome	metabolic process	Pf00164	1.42801	1.24074	1.31311	0.868857	0.458574	0.919534	0.601967
P85968	6-phosphogluconate dehydrogenase, decarboxylating OS=Rattus norvegicus GN=Pgd PE=1 SV=1 - [6PGD_RAT]	53.202	7.02002	29.4	8	5	nucleotide binding; catalytic activity	cytoplasm	metabolic process	Pf00393; Pf03446	0.885875	0.498453	0.832661	0.562667	0.00021152	0.93993	0.728329
E9PSQ7	Peroxisomal membrane protein 2 OS=Rattus norvegicus GN=Pxmp2 PE=2 SV=1 - [E9PSQ7_RAT]	9.68945	10.1401	29.55	3	4		membrane			0.516694	0.46402	0.49828	0.898056	0.606041	0.964363	0.885853
G3V7V6	All-trans-13,14-dihydroretinol saturase, isoform CRA_b OS=Rattus norvegicus GN=Retsat PE=4 SV=1 - [G3V7V6_RAT]	67.4343	8.80713	29.56	14	2	catalytic activity	membrane; nucleus; cytoplasm; endoplasmic reticulum	metabolic process		0.797388	0.715324	0.757158	0.897084	0.600886	0.949548	0.789853
Q7T2A8	SH3 domain-binding glutamic acid-rich-like protein OS=Danio rerio GN=zgc:64130 PE=3 SV=1 - [Q7T2A8_DANRE]	12.9132	4.81787	29.57	2	1	catalytic activity		cellular homeostasis; regulation of biological process	Pf00462; Pf04908	1.15084	1.33652	1.27281	1.16135	0.284185	1.10599	0.278529
Q5EB77	Ras-related protein Rab-18 OS=Rattus norvegicus GN=Rab18 PE=2 SV=1 - [RAB18_RAT]	22.9616	5.23682	29.61	5	4	nucleotide binding; protein binding	nucleus; cytoplasm	development; metabolic process; regulation of biological process; transport; cell communication; response to stimulus	Pf00025; Pf00071; Pf04670; Pf08477; Pf09439	0.570879	0.699147	0.548396	1.22469	0.166258	0.960618	0.861513
H7C5Y5	60S ribosomal protein L6 OS=Rattus norvegicus PE=3 SV=1 - [H7C5Y5_RAT]	33.6309	10.6968	29.63	7	8	structural molecule activity	cytoplasm; ribosome	metabolic process	Pf01159; Pf03868	0.409741	0.564607	0.251573	1.37796	0.0375102	0.613981	0.000192115
G3V6I9	60S ribosomal protein L26 OS=Rattus norvegicus GN=Rpl26 PE=3 SV=1 - [G3V6I9_RAT]	17.2475	10.5503	29.66	6	6	structural molecule activity	cytoplasm; ribosome; cytosol	metabolic process	Pf00467	1.79954	1.57048	1.88726	0.872715	0.477099	1.04874	0.548848
D3ZIC2	Protein Uroc1 OS=Rattus norvegicus GN=Uroc1 PE=4 SV=1 - [D3ZIC2_RAT]	74.6395	7.04932	29.73	15	2	catalytic activity		metabolic process	Pf01175	0.623216	0.552001	0.586694	0.88573	0.541861	0.941397	0.737652
D4A6H5	40S ribosomal protein S24 OS=Rattus norvegicus GN=Rps24 PE=2 SV=1 - [D4A6H5_RAT]	15.1873	10.8872	29.77	2	3	nucleotide binding; structural molecule activity	cytoplasm; ribosome	metabolic process	Pf01282	1.14267	1.05631	1.11754	0.924421	0.750202	0.978006	0.974479
Q4VBU7	Cytochrome c oxidase subunit Vaa OS=Danio rerio GN=cox5aa PE=2 SV=1 - [Q4VBU7_DANRE]	15.8863	6.58057	29.79	3	1	catalytic activity; transporter activity	cytoplasm; membrane; mitochondrion	cell differentiation; development	Pf02284	0.949908	0.870996	0.946486	0.916926	0.70848	0.996398	0.894173
Q66X93	Staphylococcal nuclease domain-containing protein 1 OS=Rattus norvegicus GN=Snd1 PE=2 SV=1 - [SND1_RAT]	101.888	7.18115	29.81	17	4	catalytic activity	nucleus; cytoplasm; mitochondrion	metabolic process; regulation of biological process	Pf00565; Pf00567	0.699544	0.707295	0.671681	1.01108	0.800011	0.960169	0.858595
A7E2K4	Rplp2l protein OS=Danio rerio GN=rplp2l PE=4 SV=1 - [A7E2K4_DANRE]	11.6308	4.53857	29.82	3	1	structural molecule activity	cytoplasm; ribosome	metabolic process; development	Pf00428	1.02977	0.962571	0.993387	0.934745	0.808301	0.96467	0.88785
A7YT47	Hadha protein OS=Danio rerio GN=hadhaa PE=2 SV=1 - [A7YT47_DANRE]	81.823	9.12939	29.83	11	2	nucleotide binding; catalytic activity	cytoplasm; mitochondrion; organelle lumen	metabolic process; response to stimulus	Pf00378; Pf00725; Pf02737	1.21323	1.19586	1.10007	0.985681	0.917798	0.906726	0.526755
Q1MTI4	Triosephosphate isomerase A OS=Danio rerio GN=tpi1a PE=2 SV=1 - [TPISA_DANRE]	26.8365	5.021	29.84	2	5	catalytic activity		metabolic process	Pf00121	4.24104	2.3988	2.37017	0.565617	0.000243333	0.558865	7.60175e-06
Q76BG8	Fructose-bisphosphate aldolase (Fragment) OS=Ambystoma mexicanum PE=2 SV=1 - [Q76BG8_AMBME]	36.1475	7.85498	29.91	8	4	catalytic activity		metabolic process	Pf00274	0.359065	0.66825	0.773045	1.86108	0.000116349	2.15294	8.56669e-13
A8E5K1	Zgc:63674 protein OS=Danio rerio GN=sord PE=2 SV=1 - [A8E5K1_DANRE]	38.0315	7.62061	29.94	7	4	nucleotide binding; metal ion binding; catalytic activity		metabolic process	Pf00107; Pf08240	1.20373	1.19447	1.20866	0.992305	0.886505	1.0041	0.839019
D3ZT90	Glutaryl-Coenzyme A dehydrogenase (Predicted) OS=Rattus norvegicus GN=Gcdh PE=3 SV=1 - [D3ZT90_RAT]	49.6815	8.71924	29.98	8	1	catalytic activity	cytoplasm; mitochondrion; membrane	metabolic process	Pf00441; Pf02770; Pf02771; Pf08028	1.1078	0.930411	1.13677	0.839876	0.330755	1.02615	0.688343
Q6PHG2	Hemopexin OS=Danio rerio GN=hpx PE=2 SV=2 - [HEMO_DANRE]	50.9937	6.63916	29.98	12	1	metal ion binding	extracellular	transport; response to stimulus		1.18121	1.0673	1.10951	0.903563	0.635475	0.939301	0.724338
Q64680	Cytochrome P450 2D18 OS=Rattus norvegicus GN=Cyp2d18 PE=2 SV=1 - [CP2DI_RAT]	56.6473	7.69385	30	3	16	catalytic activity; metal ion binding	cytoplasm; mitochondrion; endoplasmic reticulum; membrane	reproduction; metabolic process; response to stimulus; regulation of biological process	Pf00067	0.723722	0.673372	0.709522	0.93043	0.783949	0.98038	0.989839
Q7ZWJ4	60S ribosomal protein L18a OS=Danio rerio GN=rpl18a PE=2 SV=1 - [RL18A_DANRE]	20.6671	11.1509	30.11	3	3	structural molecule activity	cytoplasm; ribosome	metabolic process	Pf01775	0.943569	1.03624	0.873739	1.09821	0.458622	0.925994	0.641234
H9GXI2	Uncharacterized protein OS=Danio rerio GN=hadhb PE=3 SV=1 - [H9GXI2_DANRE]	50.1841	9.59814	30.15	2	1	catalytic activity	membrane	metabolic process	Pf00108; Pf00109; Pf02803	1.44875	1.32074	1.56658	0.911641	0.679364	1.08133	0.379832
D4A575	Protein Slc25a15 OS=Rattus norvegicus GN=Slc25a15 PE=3 SV=1 - [D4A575_RAT]	32.7757	8.89502	30.23	8	2		cytoplasm; mitochondrion; membrane	transport	Pf00153	0.503885	0.434334	0.438476	0.86197	0.426336	0.87019	0.337262
D4A8V6	Dolichyl-diphosphooligosaccharide--protein glycosyltransferase subunit 2 OS=Rattus norvegicus GN=Rpn2 PE=2 SV=1 - [D4A8V6_RAT]	67.1963	6.29053	30.23	13	4	catalytic activity	cytoplasm; endoplasmic reticulum; membrane	metabolic process	Pf05817	0.785608	0.472452	0.50818	0.601384	0.00115027	0.646862	0.000916872
I1ZIH0	Prohibitin-1 OS=Schmidtea mediterranea PE=2 SV=1 - [I1ZIH0_SCHMD]	32.7145	9.75928	30.24	9	1		membrane		Pf01145	2.20438	2.09983	2.23046	0.95257	0.909423	1.01183	0.784813
P11951	Cytochrome c oxidase subunit 6C-2 OS=Rattus norvegicus GN=Cox6c2 PE=1 SV=3 - [CX6C2_RAT]	8.44945	10.0669	30.26	3	1	catalytic activity; transporter activity	cytoplasm; mitochondrion; membrane		Pf02937	0.68986	0.581399	0.589317	0.842778	0.342587	0.854256	0.268574
O42248	Guanine nucleotide-binding protein subunit beta-2-like 1 OS=Danio rerio GN=gnb2l1 PE=2 SV=1 - [GBLP_DANRE]	35.1005	7.69385	30.28	3	3	protein binding	cytoplasm	development; cell communication; regulation of biological process; response to stimulus; cell division	Pf00400	1.38688	1.21607	1.42507	0.876839	0.497253	1.02754	0.679332
Q6P9V6	Proteasome subunit alpha type OS=Rattus norvegicus GN=Psma5 PE=2 SV=1 - [Q6P9V6_RAT]	26.3942	4.79248	30.29	2	2	catalytic activity	proteasome; nucleus; organelle lumen; cytoplasm	metabolic process	Pf00227; Pf10584	0.504801	0.412238	0.553269	0.816634	0.244419	1.09601	0.31678
Q6NWC4	Gcat protein (Fragment) OS=Danio rerio GN=gcat PE=2 SV=1 - [Q6NWC4_DANRE]	49.5816	8.1333	30.35	11	3	catalytic activity		metabolic process	Pf00155; Pf00266	0.953465	0.865542	1.03036	0.907786	0.658321	1.08064	0.382965
D3ZFJ6	Lactamase, beta (Predicted) OS=Rattus norvegicus GN=Lactb PE=4 SV=1 - [D3ZFJ6_RAT]	60.382	8.82178	30.36	13	1		cytoplasm; mitochondrion		Pf00144	0.62557	0.6344	0.538148	1.01412	0.786374	0.860253	0.293352
A1XF83	UDP glycosyltransferase 2 family polypeptide B OS=Rattus norvegicus GN=Ugt2b PE=2 SV=1 - [A1XF83_RAT]	60.9455	8.49951	30.38	11	23	catalytic activity	cytoplasm; endoplasmic reticulum; membrane	metabolic process	Pf00201; Pf04101	0.395132	0.386368	0.369738	0.97782	0.955376	0.935734	0.701806
Q9Z0V5	Peroxiredoxin-4 OS=Rattus norvegicus GN=Prdx4 PE=2 SV=1 - [PRDX4_RAT]	30.9881	6.65381	30.4	4	2	antioxidant activity; catalytic activity	extracellular; cytoplasm; mitochondrion	metabolic process	Pf00578; Pf08534; Pf10417	1.02559	1.07459	0.934957	1.04778	0.642859	0.911624	0.55507
Q68FY0	Cytochrome b-c1 complex subunit 1, mitochondrial OS=Rattus norvegicus GN=Uqcrc1 PE=1 SV=1 - [QCR1_RAT]	52.8154	5.88428	30.42	11	1	catalytic activity; metal ion binding; protein binding	cytoplasm; mitochondrion; membrane	metabolic process; transport; response to stimulus	Pf00675; Pf05193; Pf08367	0.74527	0.86383	0.718367	1.15908	0.289394	0.9639	0.882846
Q3B7D0	Coproporphyrinogen-III oxidase, mitochondrial OS=Rattus norvegicus GN=Cpox PE=2 SV=1 - [HEM6_RAT]	49.2466	8.52881	30.47	10	4	catalytic activity; protein binding	cytoplasm; mitochondrion; membrane	metabolic process; response to stimulus	Pf01218	0.473809	0.493601	0.445866	1.04177	0.667344	0.941024	0.735281
F1M668	Protein Grhpr (Fragment) OS=Rattus norvegicus GN=Grhpr PE=2 SV=1 - [F1M668_RAT]	35.6238	8.93896	30.49	8	5	nucleotide binding; catalytic activity	cytoplasm; cytosol	metabolic process	Pf00389; Pf02826	0.679144	0.865158	0.643323	1.2739	0.105922	0.947256	0.775112
P21913	Succinate dehydrogenase [ubiquinone] iron-sulfur subunit, mitochondrial OS=Rattus norvegicus GN=Sdhb PE=2 SV=2 - [DHSB_RAT]	31.8089	8.67529	30.5	9	2	catalytic activity; metal ion binding	cytoplasm; mitochondrion; membrane	metabolic process; transport		1.76565	1.74703	1.80268	0.989455	0.899923	1.02097	0.72261
F1LPM4	Amine oxidase [flavin-containing] B OS=Rattus norvegicus GN=Maob PE=2 SV=1 - [F1LPM4_RAT]	56.9046	8.25049	30.56	12	3	catalytic activity	cytoplasm; mitochondrion; membrane	metabolic process	Pf01593	0.543643	0.476393	0.534172	0.876298	0.494591	0.98258	0.995366
Q7TP52	Carboxymethylenebutenolidase homolog OS=Rattus norvegicus GN=Cmbl PE=2 SV=1 - [CMBL_RAT]	27.885	6.7124	30.61	7	1	catalytic activity	cytoplasm; cytosol	metabolic process	Pf00326; Pf00561; Pf01738; Pf12695; Pf12697	0.663787	0.664818	0.583301	1.00155	0.843458	0.878747	0.377844
G3V885	Myosin-6 OS=Rattus norvegicus GN=Myh6 PE=4 SV=1 - [G3V885_RAT]	223.371	5.73193	30.63	3	8	catalytic activity; motor activity; nucleotide binding; protein binding; structural molecule activity	chromosome; nucleus; organelle lumen; cytoskeleton; cytoplasm; Golgi; membrane	cell organization and biogenesis; development; regulation of biological process; metabolic process; transport; reproduction; cellular component movement; cell differentiation; cell communication; response to stimulus	Pf00038; Pf00063; Pf00769; Pf01576; Pf02463; Pf02736; Pf05483; Pf05557; Pf05911; Pf06160; Pf07888; Pf09726; Pf09730; Pf12128	0.804534	0.89053	1.13092	1.10689	0.430948	1.40569	0.00108273
Q07984	Translocon-associated protein subunit delta OS=Rattus norvegicus GN=Ssr4 PE=2 SV=1 - [SSRD_RAT]	18.9675	5.78271	30.64	4	2		cytoplasm; endoplasmic reticulum; membrane		Pf05404	0.334195	0.305296	0.281124	0.913529	0.689733	0.841197	0.219188
B5DEN5	Eukaryotic translation elongation factor 1 beta 2 OS=Rattus norvegicus GN=Eef1b2 PE=2 SV=1 - [B5DEN5_RAT]	24.6603	4.71631	30.67	5	3	RNA binding	cytoplasm	metabolic process	Pf00736	0.687704	0.623013	0.597752	0.905932	0.648264	0.869199	0.332727
P30713	Glutathione S-transferase theta-2 OS=Rattus norvegicus GN=Gstt2 PE=1 SV=3 - [GSTT2_RAT]	27.4215	7.91357	30.74	5	1	catalytic activity; protein binding	nucleus; organelle lumen; cytoplasm; cytosol	metabolic process	Pf00043; Pf02798	0.476957	0.431603	0.424727	0.904909	0.64273	0.890493	0.437495
D3ZIL6	Enoyl Coenzyme A hydratase domain containing 2 (Predicted), isoform CRA_a OS=Rattus norvegicus GN=Echdc2 PE=3 SV=1 - [D3ZIL6_RAT]	31.7588	9.33447	30.74	6	3	catalytic activity		metabolic process	Pf00378	1.1549	1.0166	0.81447	0.880249	0.514177	0.705228	0.00856842
Q8VID1	Dehydrogenase/reductase SDR family member 4 OS=Rattus norvegicus GN=Dhrs4 PE=2 SV=2 - [DHRS4_RAT]	29.8028	9.5542	30.82	8	2	nucleotide binding; catalytic activity; protein binding	nucleus; cytoplasm; mitochondrion; membrane	metabolic process; cell organization and biogenesis	Pf00106; Pf08659	0.757672	0.798488	0.64637	1.05387	0.618539	0.8531	0.263949
Q7SYE2	Actinin, alpha 4 OS=Danio rerio GN=actn4 PE=2 SV=1 - [Q7SYE2_DANRE]	103.721	5.16064	30.85	5	6	protein binding; metal ion binding			Pf00307; Pf00435; Pf08726; Pf11971	1.04594	1.12269	1.06124	1.07337	0.544432	1.01463	0.765558
P68511	14-3-3 protein eta OS=Rattus norvegicus GN=Ywhah PE=1 SV=2 - [1433F_RAT]	28.194	4.89404	30.89	3	5	protein binding	cytoplasm	regulation of biological process; transport; metabolic process; cell communication; response to stimulus; cell differentiation; cell organization and biogenesis; development	Pf00244	0.811417	0.855647	0.875372	1.05451	0.616012	1.07882	0.391411
O88813	Long-chain-fatty-acid--CoA ligase 5 OS=Rattus norvegicus GN=Acsl5 PE=2 SV=1 - [ACSL5_RAT]	76.3556	7.29834	30.89	15	4	nucleotide binding; catalytic activity	cytoplasm; mitochondrion; membrane; endoplasmic reticulum	metabolic process; response to stimulus; regulation of biological process; transport; cell death	Pf00501	0.506707	0.554029	0.365167	1.09339	0.4745	0.720668	0.0140171
F1R4Z8	Glutathione S-transferase OS=Danio rerio GN=gstal PE=3 SV=1 - [F1R4Z8_DANRE]	25.1763	8.22119	30.94	7	3	catalytic activity; protein binding		metabolic process	Pf00043; Pf02798	1.05085	0.90305	0.923642	0.859353	0.414376	0.878949	0.378833
D3ZCV0	Protein Actn2 OS=Rattus norvegicus GN=Actn2 PE=4 SV=1 - [D3ZCV0_RAT]	103.768	5.45264	30.98	8	3	protein binding; metal ion binding	cytoplasm; cytoskeleton	cell organization and biogenesis; cellular homeostasis; regulation of biological process; transport	Pf00307; Pf00435; Pf08726; Pf11971	0.427025	0.707604	0.643035	1.65706	0.0015322	1.50585	9.81362e-05
Q7ZUW8	Aspartate aminotransferase OS=Danio rerio GN=got1 PE=2 SV=1 - [Q7ZUW8_DANRE]	45.9532	7.00537	30.98	9	2	catalytic activity		metabolic process	Pf00155	1.28988	1.16196	1.26028	0.900832	0.620824	0.977057	0.968329
Q7T1D8	Phb protein OS=Danio rerio GN=phb PE=2 SV=1 - [Q7T1D8_DANRE]	29.6668	5.40186	31	4	4		membrane		Pf01145	1.13612	1.1785	1.17926	1.03731	0.685886	1.03797	0.613259
Q6P502	T-complex protein 1 subunit gamma OS=Rattus norvegicus GN=Cct3 PE=1 SV=1 - [TCPG_RAT]	60.6084	6.63916	31.01	10	1	nucleotide binding; protein binding	cytoplasm; cytosol; cytoskeleton; membrane	metabolic process	Pf00118	0.919114	1.02003	0.843606	1.1098	0.421948	0.917846	0.591845
Q5M884	Protein Eci3 OS=Rattus norvegicus GN=Eci3 PE=2 SV=1 - [Q5M884_RAT]	33.6651	8.44092	31.02	7	1	catalytic activity		metabolic process	Pf00378	0.50863	0.455278	0.466737	0.895107	0.590461	0.917637	0.590597
Q6P3K5	Krt5 protein OS=Danio rerio GN=krt5 PE=2 SV=1 - [Q6P3K5_DANRE]	57.7923	5.33838	31.1	4	14	catalytic activity; motor activity; structural molecule activity	cytoskeleton	development; response to stimulus	Pf00038; Pf01576	1.36018	1.32315	1.48735	0.972774	0.979717	1.0935	0.326995
Q9Z2M4	Peroxisomal 2,4-dienoyl-CoA reductase OS=Rattus norvegicus GN=Decr2 PE=2 SV=1 - [DECR2_RAT]	31.2723	8.25049	31.16	8	1	nucleotide binding; structural molecule activity; catalytic activity; protein binding; metal ion binding	cytoplasm; membrane; ribosome	metabolic process	Pf00106; Pf08659	0.728065	0.732669	0.768009	1.00632	0.821583	1.05486	0.51409
P0C0S7	Histone H2A.Z OS=Rattus norvegicus GN=H2afz PE=1 SV=2 - [H2AZ_RAT]	13.5446	10.5796	31.25	2	8	DNA binding; protein binding	chromosome; nucleus; organelle lumen	cell organization and biogenesis; metabolic process	Pf00125	1.8745	1.27837	1.38425	0.681979	0.016707	0.738466	0.023631
Q5XIT9	Methylcrotonoyl-CoA carboxylase beta chain, mitochondrial OS=Rattus norvegicus GN=Mccc2 PE=2 SV=1 - [MCCB_RAT]	61.4784	8.30908	31.26	10	2	nucleotide binding; catalytic activity	cytoplasm; mitochondrion; organelle lumen	metabolic process	Pf01039	1.57921	1.50554	1.34814	0.95335	0.913849	0.853679	0.266261
P97524	Very long-chain acyl-CoA synthetase OS=Rattus norvegicus GN=Slc27a2 PE=1 SV=1 - [S27A2_RAT]	70.6485	8.5874	31.29	17	5	nucleotide binding; catalytic activity; protein binding; transporter activity	cytoplasm; mitochondrion; membrane; endoplasmic reticulum; organelle lumen	metabolic process; transport	Pf00501	0.65469	0.55425	0.513965	0.846584	0.358446	0.785052	0.0755253
Q5M875	17-beta-hydroxysteroid dehydrogenase 13 OS=Rattus norvegicus GN=Hsd17b13 PE=2 SV=1 - [DHB13_RAT]	33.4732	9.37842	31.33	7	3	nucleotide binding; catalytic activity	extracellular	metabolic process	Pf00106; Pf08659	0.768344	0.741448	0.675666	0.964995	0.979756	0.87938	0.380941
Q5XIU9	Membrane-associated progesterone receptor component 2 OS=Rattus norvegicus GN=Pgrmc2 PE=1 SV=1 - [PGRC2_RAT]	23.3887	5.26221	31.34	4	1		membrane		Pf00173	0.580955	0.603646	0.511287	1.03906	0.67858	0.880081	0.384392
Q68FQ0	T-complex protein 1 subunit epsilon OS=Rattus norvegicus GN=Cct5 PE=1 SV=1 - [TCPE_RAT]	59.4988	5.71924	31.42	10	6	nucleotide binding; protein binding	nucleus; organelle lumen; cytoplasm; cytoskeleton; cytosol	metabolic process; response to stimulus	Pf00118	0.549765	0.58425	0.869026	1.06273	0.584161	1.58072	1.44293e-05
Q6PBJ8	Peptidyl-prolyl cis-trans isomerase OS=Danio rerio GN=fkbp1aa PE=4 SV=1 - [Q6PBJ8_DANRE]	11.6779	7.98682	31.48	2	3	catalytic activity	cytoplasm; endoplasmic reticulum; membrane	metabolic process	Pf00254	1.4973	1.21596	1.1405	0.812107	0.22939	0.761705	0.0436935
F1LSQ6	Proteasome subunit alpha type OS=Rattus norvegicus GN=Psma7 PE=2 SV=1 - [F1LSQ6_RAT]	28.3809	8.45557	31.5	7	6	catalytic activity	proteasome; nucleus; cytoplasm	metabolic process	Pf00227; Pf10584	1.23848	1.04494	1.29569	0.843727	0.346506	1.0462	0.5637
Q63584	Transmembrane emp24 domain-containing protein 10 OS=Rattus norvegicus GN=Tmed10 PE=1 SV=2 - [TMEDA_RAT]	24.8418	6.41748	31.51	4	2	protein binding	cytoplasm; endoplasmic reticulum; membrane; Golgi	response to stimulus; development; transport; cell organization and biogenesis; metabolic process	Pf01105	0.494676	0.537179	0.635166	1.08592	0.499866	1.284	0.0145558
P18421	Proteasome subunit beta type-1 OS=Rattus norvegicus GN=Psmb1 PE=1 SV=3 - [PSB1_RAT]	26.4623	7.35693	31.67	4	2	catalytic activity	proteasome; nucleus; cytoplasm	metabolic process	Pf00227	0.737528	0.843726	0.634829	1.14399	0.32604	0.860752	0.295471
F1QYC7	3-hydroxyanthranilate 3,4-dioxygenase OS=Danio rerio GN=haao PE=4 SV=1 - [F1QYC7_DANRE]	33.1715	5.73193	31.71	8	2	catalytic activity; metal ion binding	cytoplasm	metabolic process	Pf06052; Pf07883	1.07935	1.0931	1.11232	1.01275	0.792512	1.03055	0.65989
B0R0S6	Eukaryotic translation initiation factor 6 OS=Danio rerio GN=eif6 PE=3 SV=1 - [B0R0S6_DANRE]	14.2281	6.50732	31.78	2	4	RNA binding; nucleotide binding	nucleus; organelle lumen; cytoplasm	metabolic process; cell communication; regulation of biological process; response to stimulus; cell organization and biogenesis	Pf01031; Pf01912	1.26736	1.28672	1.22175	1.01528	0.781165	0.964016	0.8836
Q3MHS9	Chaperonin containing Tcp1, subunit 6A (Zeta 1) OS=Rattus norvegicus GN=Cct6a PE=2 SV=1 - [Q3MHS9_RAT]	57.9807	7.07861	31.83	6	7	nucleotide binding; protein binding	cytoplasm; cytosol; cytoskeleton	metabolic process	Pf00118	0.58633	0.467425	0.595373	0.797204	0.184091	1.01542	0.76011
G3V732	Elongation factor 1-delta OS=Rattus norvegicus GN=Eef1d PE=3 SV=1 - [G3V732_RAT]	28.7485	4.97021	31.91	6	5	RNA binding; signal transducer activity	cytoplasm	metabolic process; cell communication; regulation of biological process; response to stimulus	Pf00736	0.783788	0.657279	0.784892	0.838592	0.325595	1.00141	0.858154
B0K031	60S ribosomal protein L7 OS=Rattus norvegicus GN=Rpl7 PE=2 SV=1 - [B0K031_RAT]	30.294	10.8726	31.92	7	12	DNA binding; RNA binding; structural molecule activity; protein binding	cytoplasm; ribosome; cytosol	metabolic process	Pf00327; Pf08079	0.536088	0.430105	0.502723	0.802302	0.198869	0.937762	0.714595
B2GV33	Maoa protein (Fragment) OS=Rattus norvegicus GN=Maoa PE=2 SV=1 - [B2GV33_RAT]	58.7653	8.07471	31.92	12	4	catalytic activity	cytoplasm; mitochondrion; membrane	cell communication; metabolic process	Pf00890; Pf01266; Pf01494; Pf01593; Pf01946; Pf03486; Pf07992; Pf12831	0.883792	0.858777	0.832568	0.971696	0.984933	0.942041	0.74175
F1LU71	Protein Auh (Fragment) OS=Rattus norvegicus GN=Auh PE=3 SV=1 - [F1LU71_RAT]	33.1179	9.42236	31.95	8	1	RNA binding; catalytic activity		metabolic process	Pf00378	0.733658	0.685237	0.669577	0.934	0.804093	0.912655	0.561102
Q8CHM7	2-hydroxyacyl-CoA lyase 1 OS=Rattus norvegicus GN=Hacl1 PE=1 SV=1 - [HACL1_RAT]	63.5752	7.32764	32.01	18	3	metal ion binding; catalytic activity; protein binding	cytoplasm	metabolic process; cell organization and biogenesis	Pf00205; Pf02775; Pf02776	0.699025	0.717414	0.667519	1.02631	0.732697	0.954929	0.824609
G3V6T5	Apoptosis-inducing factor 1, mitochondrial OS=Rattus norvegicus GN=Aifm1 PE=4 SV=1 - [G3V6T5_RAT]	66.0925	8.89502	32.07	13	3	DNA binding; catalytic activity	nucleus; cytoplasm; mitochondrion; membrane; cytosol	cell death; cell organization and biogenesis; metabolic process; regulation of biological process; cell differentiation; development; cellular homeostasis; cell communication; response to stimulus	Pf00070; Pf07992	0.655759	0.762354	0.583994	1.16255	0.281442	0.890561	0.437854
P06214	Delta-aminolevulinic acid dehydratase OS=Rattus norvegicus GN=Alad PE=1 SV=1 - [HEM2_RAT]	36.0084	6.78564	32.12	8	2	catalytic activity; metal ion binding; protein binding	extracellular; cytoplasm; cytosol	response to stimulus; metabolic process; cell organization and biogenesis	Pf00490	0.713206	0.744883	0.554922	1.04441	0.656505	0.778067	0.0645682
P07379	Phosphoenolpyruvate carboxykinase, cytosolic [GTP] OS=Rattus norvegicus GN=Pck1 PE=1 SV=1 - [PCKGC_RAT]	69.371	6.49365	32.15	13	3	nucleotide binding; metal ion binding; catalytic activity	nucleus; cytoplasm; cytosol	metabolic process; response to stimulus	Pf00821	0.908351	1.17592	0.961849	1.29457	0.0869364	1.0589	0.491933
F1Q746	Uncharacterized protein OS=Danio rerio GN=pcca PE=2 SV=1 - [F1Q746_DANRE]	77.81	7.09326	32.16	10	5	catalytic activity; nucleotide binding; metal ion binding		metabolic process	Pf00289; Pf00364; Pf01071; Pf02222; Pf02785; Pf02786; Pf07478; Pf08442; Pf08443	1.18109	1.32303	1.2269	1.12018	0.390902	1.03878	0.608272
B5DES0	Protein Snrpd2 OS=Rattus norvegicus GN=Snrpd2 PE=4 SV=1 - [B5DES0_RAT]	13.5182	9.90576	32.2	3	2		nucleus; spliceosomal complex		Pf01423	0.610536	0.687162	0.563438	1.12551	0.375623	0.922858	0.622069
Q66HP8	Mitochondrial carnitine/acylcarnitine carrier protein OS=Rattus norvegicus GN=Slc25a20 PE=2 SV=1 - [Q66HP8_RAT]	33.0492	9.40771	32.23	6	1		cytoplasm; mitochondrion; membrane	transport	Pf00153	2.04864	2.1956	2.43461	1.07173	0.550435	1.1884	0.0821427
Q6AXX6	Redox-regulatory protein FAM213A OS=Rattus norvegicus GN=Fam213a PE=1 SV=1 - [F213A_RAT]	25.7465	9.14404	32.31	7	1	antioxidant activity; catalytic activity	cytoplasm; mitochondrion	cell differentiation; development; regulation of biological process; metabolic process		0.527599	0.506871	0.565832	0.960713	0.955574	1.07247	0.421833
Q5D059	Heterogeneous nuclear ribonucleoprotein K OS=Rattus norvegicus GN=Hnrnpk PE=2 SV=1 - [Q5D059_RAT]	50.9964	5.32568	32.33	4	10	DNA binding; RNA binding	chromosome; nucleus; organelle lumen; spliceosomal complex; cytoplasm	metabolic process; regulation of biological process; cell organization and biogenesis; transport	Pf00013; Pf08067	0.256057	0.221533	0.234083	0.86517	0.441179	0.914181	0.570077
G3V8L3	Lamin A, isoform CRA_b OS=Rattus norvegicus GN=Lmna PE=3 SV=1 - [G3V8L3_RAT]	74.2667	6.97607	32.33	15	7	structural molecule activity	nucleus; cytoskeleton; organelle lumen; cytoplasm	cell organization and biogenesis; reproduction; development; cellular component movement; regulation of biological process; cell communication; response to stimulus; transport; cell death; cell differentiation	Pf00038; Pf00932; Pf12128	1.30799	1.18448	1.26064	0.905574	0.646328	0.963805	0.882228
Q6PC69	60S ribosomal protein L10a OS=Danio rerio GN=rpl10a PE=2 SV=1 - [RL10A_DANRE]	24.6065	9.93506	32.41	2	2	RNA binding; structural molecule activity	cytoplasm; ribosome	metabolic process	Pf00687	1.01416	1.01924	1.10308	1.005	0.827615	1.08768	0.351558
B0BNK1	Protein Rab5c OS=Rattus norvegicus GN=Rab5c PE=2 SV=1 - [B0BNK1_RAT]	23.4108	8.41162	32.41	3	12	nucleotide binding; catalytic activity	nucleus; cytoplasm	cell organization and biogenesis; cell communication; regulation of biological process; response to stimulus; transport	Pf00009; Pf00025; Pf00071; Pf04670; Pf08477	0.667854	0.596856	0.605276	0.893691	0.583026	0.906299	0.524315
Q6PC13	Prohibitin 2 OS=Danio rerio GN=phb2 PE=2 SV=1 - [Q6PC13_DANRE]	33.3369	9.90576	32.45	4	3		membrane		Pf01145	1.51965	1.36132	1.47527	0.89581	0.59416	0.970799	0.927709
Q6P5M3	Ribosomal protein S9 OS=Danio rerio GN=rps9 PE=2 SV=1 - [Q6P5M3_DANRE]	22.4525	10.5063	32.47	2	5	RNA binding; structural molecule activity	cytoplasm; ribosome	metabolic process	Pf00163; Pf01479	1.0817	0.970406	0.843377	0.897108	0.601015	0.779675	0.0669751
D3ZDV3	Protein RGD1307051 OS=Rattus norvegicus GN=RGD1307051 PE=4 SV=1 - [D3ZDV3_RAT]	74.6276	8.63135	32.5	19	4	catalytic activity	cytoplasm; mitochondrion	metabolic process	Pf00501; Pf11930	0.777073	0.6944	0.683059	0.89361	0.582602	0.879015	0.379156
Q6DRD1	ATP synthase oligomycin sensitivity conferral protein OS=Danio rerio GN=atp5o PE=2 SV=1 - [Q6DRD1_DANRE]	22.4683	9.81787	32.54	6	1	transporter activity	membrane	metabolic process; transport	Pf00213	0.972968	0.909949	0.946797	0.93523	0.811047	0.973101	0.942667
P57093	Phytanoyl-CoA dioxygenase, peroxisomal OS=Rattus norvegicus GN=Phyh PE=1 SV=2 - [PAHX_RAT]	38.5635	8.48486	32.54	11	1	catalytic activity; metal ion binding	cytoplasm; mitochondrion	metabolic process	Pf05721	0.660711	0.675097	0.619342	1.02177	0.752444	0.937387	0.71223
Q7ZV05	Ribosomal protein S11 OS=Danio rerio GN=rps11 PE=2 SV=1 - [Q7ZV05_DANRE]	18.3939	10.4624	32.7	3	3	structural molecule activity	cytoplasm; ribosome	metabolic process	Pf00366	0.979671	0.923765	1.03883	0.942935	0.854709	1.06038	0.483915
Q5U2Q3	Ester hydrolase C11orf54 homolog OS=Rattus norvegicus PE=1 SV=1 - [CK054_RAT]	34.9704	6.62451	32.7	7	1	catalytic activity; metal ion binding	nucleus		Pf08925	0.471428	0.396185	0.398324	0.840394	0.332852	0.84493	0.232665
Q6P3V9	60S ribosomal protein L4 OS=Rattus norvegicus GN=Rpl4 PE=2 SV=1 - [Q6P3V9_RAT]	47.2711	11.019	32.78	12	2	structural molecule activity; protein binding	nucleus; organelle lumen; cytoplasm; ribosome; cytosol	metabolic process	Pf00573	0.814084	0.668325	0.71111	0.820953	0.259308	0.873509	0.352707
Q6TNT9	GDP dissociation inhibitor 2 OS=Danio rerio GN=gdi2 PE=2 SV=1 - [Q6TNT9_DANRE]	50.5547	5.84619	32.81	5	5	enzyme regulator activity		transport	Pf00996	1.13797	1.03896	1.30299	0.912999	0.686821	1.14502	0.161641
D3Z880	2-oxoisovalerate dehydrogenase subunit beta, mitochondrial OS=Rattus norvegicus GN=Bckdhb PE=2 SV=1 - [D3Z880_RAT]	34.4497	7.26904	32.81	9	5	catalytic activity	cytoplasm; mitochondrion; organelle lumen; membrane	metabolic process	Pf02779; Pf02780	0.641807	0.638218	0.579808	0.994409	0.876643	0.903399	0.507872
F1AGB8	Rab-11B (Fragment) OS=Schmidtea mediterranea PE=2 SV=1 - [F1AGB8_SCHMD]	15.264	7.06396	32.84	2	1	nucleotide binding	membrane	cell communication; regulation of biological process; response to stimulus; transport	Pf00071; Pf08477	1.68509	1.53301	1.96302	0.909749	0.669014	1.16494	0.119541
Q0D2L3	Agmatinase, mitochondrial OS=Rattus norvegicus GN=Agmat PE=2 SV=1 - [SPEB_RAT]	37.9634	7.15186	32.86	7	1	catalytic activity; metal ion binding	cytoplasm; mitochondrion	metabolic process	Pf00491	0.792791	0.616427	0.496773	0.77754	0.133973	0.626612	0.000360489
B8JIS8	Uncharacterized protein OS=Danio rerio GN=gstm PE=4 SV=1 - [B8JIS8_DANRE]	26.0446	6.37939	32.88	4	4	catalytic activity; protein binding		metabolic process	Pf00043; Pf02798	1.24665	1.37207	1.17774	1.10061	0.450859	0.944729	0.758914
P19225	Cytochrome P450 2C70 OS=Rattus norvegicus GN=Cyp2c70 PE=2 SV=1 - [CP270_RAT]	56.1199	8.01611	32.92	14	1	catalytic activity; metal ion binding	cytoplasm; endoplasmic reticulum; membrane	metabolic process	Pf00067	0.577144	0.473008	0.532375	0.819566	0.254469	0.92243	0.619468
F1R1C0	Acyl-CoA synthetase family member 2, mitochondrial OS=Danio rerio GN=acsf2 PE=2 SV=1 - [F1R1C0_DANRE]	67.5303	7.92822	33	15	5	nucleotide binding; catalytic activity	cytoplasm; mitochondrion	metabolic process	Pf00501	1.02045	1.05066	1.05504	1.0296	0.718503	1.03389	0.638675
Q5XIG9	Mitochondrial protein 18 kDa OS=Rattus norvegicus GN=Mtfp1 PE=2 SV=1 - [Q5XIG9_RAT]	18.3547	9.45166	33.13	4	1	catalytic activity; metal ion binding	cytoplasm; mitochondrion; membrane	cell organization and biogenesis	Pf10558	1.01997	1.19426	1.20225	1.17088	0.263054	1.17872	0.0961411
Q1L907	Gstr1 protein OS=Danio rerio GN=tfa PE=2 SV=1 - [Q1L907_DANRE]	26.3914	7.25439	33.19	7	3	protein binding; catalytic activity			Pf00043; Pf02798	0.954082	0.981447	0.982668	1.02868	0.722456	1.02996	0.663675
P20788	Cytochrome b-c1 complex subunit Rieske, mitochondrial OS=Rattus norvegicus GN=Uqcrfs1 PE=1 SV=2 - [UCRI_RAT]	29.4272	8.86572	33.21	6	1	catalytic activity; transporter activity; protein binding; metal ion binding	cytoplasm; mitochondrion; membrane	transport; response to stimulus; metabolic process	Pf00355; Pf02921; Pf09165	0.445939	0.521452	0.430669	1.16934	0.266386	0.965757	0.894923
B2RZD1	Protein Sec61b OS=Rattus norvegicus GN=Sec61b PE=4 SV=1 - [B2RZD1_RAT]	9.98211	11.561	33.33	2	1	protein binding		transport; metabolic process	Pf03911	0.198679	0.239392	0.122154	1.20492	0.197635	0.614833	0.000200692
P02600	Myosin light chain 1/3, skeletal muscle isoform OS=Rattus norvegicus GN=Myl1 PE=1 SV=2 - [MYL1_RAT]	20.6665	5.03369	33.33	2	9	metal ion binding	cytoskeleton; cytoplasm			2.07449	1.75022	1.98885	0.843689	0.346347	0.958721	0.849193
Q7SXN6	Proteasome subunit alpha type OS=Danio rerio GN=psma6a PE=2 SV=1 - [Q7SXN6_DANRE]	27.4118	6.3667	33.33	2	6	catalytic activity	proteasome; nucleus; cytoplasm	metabolic process	Pf00227; Pf10584	1.33551	1.35934	1.21875	1.01785	0.769752	0.912573	0.560618
F1Q884	Uncharacterized protein OS=Danio rerio GN=gnmt PE=2 SV=1 - [F1Q884_DANRE]	33.2129	6.87354	33.33	6	2	catalytic activity	cytoplasm	metabolic process	Pf01209; Pf08241; Pf08242; Pf12847	0.969236	1.00919	0.944764	1.04122	0.669621	0.974751	0.953378
Q32PW9	Psmc6 protein (Fragment) OS=Rattus norvegicus GN=Psmc6 PE=2 SV=1 - [Q32PW9_RAT]	43.2607	7.48877	33.33	10	4	nucleotide binding; RNA binding; catalytic activity	proteasome; nucleus; organelle lumen; cytoplasm; membrane	metabolic process; response to stimulus	Pf00004; Pf00910; Pf01078; Pf05496; Pf07724; Pf07726; Pf07728	1.28244	1.23543	1.23124	0.963343	0.970437	0.960076	0.857989
D3ZNG1	Glycerol kinase OS=Rattus norvegicus GN=Gk PE=2 SV=1 - [D3ZNG1_RAT]	57.4681	5.65576	33.4	10	7	catalytic activity		metabolic process	Pf00370; Pf02782	0.78737	0.747521	0.724508	0.94939	0.891367	0.920162	0.60575
Q8AXB5	Glyceraldehyde-3-phosphate dehydrogenase (Fragment) OS=Pleurodeles waltl PE=2 SV=1 - [Q8AXB5_PLEWA]	33.3831	7.91357	33.44	3	16	nucleotide binding; catalytic activity		metabolic process	Pf00044; Pf02800	0.556388	0.900157	0.826926	1.61786	0.00246787	1.48624	0.000159524
E9QEF1	Isochorismatase domain-containing protein 2, mitochondrial OS=Danio rerio GN=isoc2 PE=2 SV=1 - [E9QEF1_DANRE]	19.2409	7.75244	33.52	4	2	catalytic activity		metabolic process	Pf00857	1.24433	1.16761	1.34598	0.938344	0.828671	1.08169	0.378158
D3ZSC5	Cystathionine beta-synthase OS=Rattus norvegicus GN=Cbs PE=2 SV=1 - [D3ZSC5_RAT]	52.3516	6.68311	33.54	7	5	catalytic activity; protein binding	cytoplasm	metabolic process	Pf00291	0.501367	0.721946	0.505771	1.43996	0.0192914	1.00879	0.806
F1M779	Clathrin heavy chain 1 OS=Rattus norvegicus GN=Cltc PE=2 SV=1 - [F1M779_RAT]	191.438	5.69385	33.61	16	6	structural molecule activity; protein binding	cytoplasm; membrane; Golgi	transport	Pf00637; Pf01394; Pf04053; Pf09268	0.94917	0.875572	0.894559	0.922461	0.739248	0.942464	0.74445
F1M0K2	Aconitate hydratase, mitochondrial (Fragment) OS=Rattus norvegicus GN=Aco2 PE=2 SV=1 - [F1M0K2_RAT]	85.1419	7.69385	33.63	15	2	catalytic activity	membrane	metabolic process	Pf00330; Pf00694	0.763438	0.822479	0.666428	1.07734	0.530087	0.872931	0.349987
O97026	PRH7 (Fragment) OS=Dugesia japonica GN=PRH7 PE=2 SV=1 - [O97026_DUGJA]	12.0954	5.50342	33.64	3	2	nucleotide binding; catalytic activity			Pf00270	1.68811	1.83789	1.82679	1.08873	0.490215	1.08215	0.376074
D4A387	Aldehyde dehydrogenase OS=Rattus norvegicus GN=Aldh3a2 PE=2 SV=1 - [D4A387_RAT]	47.6008	5.45264	33.65	13	8	catalytic activity		metabolic process	Pf00171	0.621424	0.65544	0.620675	1.05474	0.615109	0.998795	0.876886
Q58FK9	Kynurenine--oxoglutarate transaminase 3 OS=Rattus norvegicus GN=Ccbl2 PE=2 SV=1 - [KAT3_RAT]	51.0113	8.35303	33.7	14	9	catalytic activity; protein binding	cytoplasm; mitochondrion	metabolic process	Pf00155; Pf01053	0.562583	0.525816	0.466147	0.934646	0.807741	0.828583	0.177442
Q64380	Sarcosine dehydrogenase, mitochondrial OS=Rattus norvegicus GN=Sardh PE=1 SV=2 - [SARDH_RAT]	101.376	6.62451	33.73	22	4	catalytic activity	cytoplasm; mitochondrion; organelle lumen	metabolic process	Pf01266; Pf01571; Pf08669	0.762175	0.732159	0.683369	0.960618	0.955038	0.896604	0.470221
Q7SZR4	Phosphoglycerate mutase 1a OS=Danio rerio GN=pgam1a PE=2 SV=1 - [Q7SZR4_DANRE]	28.8937	6.65381	33.86	2	2	catalytic activity		metabolic process	Pf00300	0.866949	0.999545	1.20139	1.15295	0.303889	1.38577	0.00170058
F1LR47	Protein LOC293989 OS=Rattus norvegicus GN=Cyp2c6v2 PE=2 SV=1 - [F1LR47_RAT]	55.9588	7.62061	33.88	16	8	catalytic activity; metal ion binding		metabolic process	Pf00067	0.678837	0.563289	0.551836	0.829785	0.291405	0.812913	0.133537
Q0ZBR7	Macrophage migration inhibitory factor OS=Danio rerio GN=mif PE=4 SV=1 - [Q0ZBR7_DANRE]	12.4042	7.12256	33.91	3	1			cell proliferation; cell death; regulation of biological process; development	Pf01187	1.19091	1.14962	1.33379	0.965333	0.981663	1.11998	0.230854
P23965	Enoyl-CoA delta isomerase 1, mitochondrial OS=Rattus norvegicus GN=Eci1 PE=1 SV=1 - [ECI1_RAT]	32.234	9.53955	33.91	10	3	catalytic activity; protein binding	cytoplasm; mitochondrion; membrane; organelle lumen	metabolic process	Pf00378	0.456319	0.45432	0.390303	0.99562	0.870984	0.85533	0.272916
Q08CI9	Zgc:153034 OS=Danio rerio GN=pmt PE=2 SV=1 - [Q08CI9_DANRE]	56.8623	6.27783	33.95	15	8	catalytic activity	cytoplasm	metabolic process	Pf00398; Pf01135; Pf01170; Pf01209; Pf02353; Pf05175; Pf05401; Pf05891; Pf06325; Pf07021; Pf08003; Pf08241; Pf08242; Pf12847	1.23056	1.11409	1.30649	0.905345	0.645086	1.0617	0.476862
D4A2K1	Protein Dhdpsl OS=Rattus norvegicus GN=Hoga1 PE=4 SV=1 - [D4A2K1_RAT]	34.4429	8.23584	33.96	10	2	catalytic activity; protein binding	cytoplasm; mitochondrion	metabolic process	Pf00701	0.615905	0.662326	0.469214	1.07537	0.537171	0.761828	0.0438281
P28480	T-complex protein 1 subunit alpha OS=Rattus norvegicus GN=Tcp1 PE=1 SV=1 - [TCPA_RAT]	60.3217	6.21436	33.99	8	4	nucleotide binding; protein binding	cytoplasm; cytoskeleton; chromosome; nucleus; organelle lumen; Golgi; cytosol; membrane	metabolic process; cell differentiation; reproduction	Pf00118	1.25569	1.22826	1.25698	0.978158	0.953753	1.00103	0.86088
P55051	Fatty acid-binding protein, brain OS=Rattus norvegicus GN=Fabp7 PE=1 SV=2 - [FABP7_RAT]	14.8544	5.63037	34.09	3	2	transporter activity	nucleus; cytoplasm	response to stimulus; transport; cell proliferation; development; cell differentiation; regulation of biological process	Pf00061	0.498606	0.375223	0.43343	0.752544	0.0851599	0.869284	0.333113
Q1LYB7	Ribosomal protein L13a OS=Danio rerio GN=rpl13a PE=3 SV=1 - [Q1LYB7_DANRE]	23.6624	10.8579	34.15	4	3	structural molecule activity	cytoplasm; ribosome	metabolic process	Pf00572	0.85609	0.818425	0.826647	0.956004	0.928906	0.965608	0.893954
P16303	Carboxylesterase 1D OS=Rattus norvegicus GN=Ces1d PE=1 SV=2 - [CES1D_RAT]	62.1077	6.53662	34.16	17	3	catalytic activity	cytoplasm; endoplasmic reticulum; organelle lumen; cytosol	metabolic process	Pf00135; Pf00326; Pf00756; Pf07859	0.502131	0.467555	0.395833	0.931142	0.787961	0.788306	0.0810883
B0S564	Uncharacterized protein OS=Danio rerio GN=p4hb PE=4 SV=1 - [B0S564_DANRE]	56.5982	4.65283	34.18	14	1	metal ion binding; catalytic activity	extracellular; cytoplasm; endoplasmic reticulum	metabolic process; cellular homeostasis; regulation of biological process	Pf00085; Pf01216	0.875041	0.817865	0.958941	0.934659	0.807816	1.09588	0.317311
B2RZD4	60S ribosomal protein L34 OS=Rattus norvegicus GN=Rpl34 PE=4 SV=1 - [B2RZD4_RAT]	13.2845	11.4731	34.19	5	6	structural molecule activity	cytoplasm; mitochondrion; ribosome; cytosol	metabolic process	Pf01199	0.928156	0.729646	0.878682	0.786124	0.154524	0.946697	0.771524
Q6DG86	Alanine-glyoxylate aminotransferase, like OS=Danio rerio GN=agxta PE=2 SV=1 - [Q6DG86_DANRE]	42.5919	8.20654	34.27	9	2	catalytic activity		metabolic process	Pf00266; Pf00282	0.913575	0.955561	0.864233	1.04596	0.650222	0.94599	0.766989
P70470	Acyl-protein thioesterase 1 OS=Rattus norvegicus GN=Lypla1 PE=1 SV=1 - [LYPA1_RAT]	24.6923	6.50732	34.35	6	1	catalytic activity	cytoplasm; mitochondrion	metabolic process	Pf00561; Pf02230; Pf03959; Pf12695; Pf12697	0.813923	0.733304	0.761935	0.900949	0.62145	0.936126	0.704275
Q5U3E1	Novel protein similar to vertebrate Ras family OS=Danio rerio GN=rab11a PE=2 SV=1 - [Q5U3E1_DANRE]	24.2963	6.3667	34.42	6	11	nucleotide binding		development; cell communication; regulation of biological process; response to stimulus; transport	Pf00025; Pf00071; Pf08477	1.45909	1.43888	1.58943	0.986148	0.915583	1.08933	0.344455
G3V8B0	Myosin-7 OS=Rattus norvegicus GN=Myh7 PE=4 SV=1 - [G3V8B0_RAT]	222.762	5.75732	34.52	3	15	nucleotide binding; catalytic activity; motor activity; protein binding	chromosome; nucleus; organelle lumen; cytoplasm; cytoskeleton; membrane	cell organization and biogenesis; reproduction	Pf00038; Pf00063; Pf01576; Pf02463; Pf02736; Pf04156; Pf05483; Pf05557; Pf05622; Pf05911; Pf06160; Pf07888; Pf09726; Pf12128	1.19366	1.33263	1.30234	1.11642	0.401927	1.09105	0.337173
Q7ZUP6	Isocitrate dehydrogenase [NADP] OS=Danio rerio GN=idh2 PE=2 SV=1 - [Q7ZUP6_DANRE]	50.3645	8.11865	34.52	6	2	metal ion binding; catalytic activity; nucleotide binding		metabolic process	Pf00180	1.18284	1.10101	1.21891	0.930821	0.786153	1.0305	0.66025
B8JMZ1	Uncharacterized protein OS=Danio rerio GN=ugp2a PE=4 SV=1 - [B8JMZ1_DANRE]	56.8425	8.45557	34.52	10	2	catalytic activity		metabolic process	Pf01704; Pf05661	1.23545	1.17128	1.19246	0.948061	0.883816	0.965207	0.891342
Q6AZA0	Acetyl-CoA acetyltransferase, mitochondrial OS=Danio rerio GN=acat1 PE=2 SV=1 - [THIL_DANRE]	44.3141	8.85107	34.52	12	1	catalytic activity; metal ion binding	cytoplasm; mitochondrion	metabolic process	Pf00108; Pf00109; Pf02803	1.03365	1.17612	0.983314	1.13783	0.341981	0.951302	0.80116
F1LQJ4	Carboxylesterase 1E OS=Rattus norvegicus GN=Ces1e PE=2 SV=1 - [F1LQJ4_RAT]	61.7005	6.0874	34.52	12	2	catalytic activity	membrane	metabolic process	Pf00135; Pf00326; Pf07859	0.925197	0.91339	0.897067	0.987238	0.91041	0.969596	0.919885
P62718	60S ribosomal protein L18a OS=Rattus norvegicus GN=Rpl18a PE=2 SV=1 - [RL18A_RAT]	20.7189	10.7114	34.66	4	4	structural molecule activity	cytoplasm; ribosome; cytosol	metabolic process	Pf01775	0.293445	0.275936	0.250413	0.940333	0.839949	0.853357	0.264971
G3V960	Guanidinoacetate N-methyltransferase OS=Rattus norvegicus GN=Gamt PE=4 SV=1 - [G3V960_RAT]	26.3601	6.26514	34.75	6	3	catalytic activity; protein binding		metabolic process; reproduction; development; regulation of biological process		0.555848	0.542946	0.54473	0.976788	0.960339	0.979998	0.987369
Q1L8L9	Adenylate kinase 2, mitochondrial OS=Danio rerio GN=ak2 PE=2 SV=1 - [KAD2_DANRE]	26.5994	5.8335	34.85	6	1	nucleotide binding; catalytic activity	cytoplasm; mitochondrion	cell differentiation; development; metabolic process	Pf00406; Pf05191	1.09342	1.39571	1.2287	1.27647	0.103375	1.12373	0.219222
F1QFC0	Uncharacterized protein OS=Danio rerio GN=hspa9 PE=2 SV=1 - [F1QFC0_DANRE]	73.906	7.13721	34.9	5	3	nucleotide binding; protein binding		cell organization and biogenesis; metabolic process	Pf00012; Pf06723	0.742692	0.964779	0.829258	1.29903	0.0832584	1.11656	0.241889
Q6NWD0	Agxt protein (Fragment) OS=Danio rerio GN=agxtb PE=2 SV=1 - [Q6NWD0_DANRE]	45.8926	8.77783	35.15	12	2	catalytic activity	cytoplasm; mitochondrion	metabolic process; cell organization and biogenesis; transport; response to stimulus	Pf00155; Pf00266; Pf01212	0.952597	0.96129	0.899275	1.00913	0.808845	0.944024	0.754408
F1QPV5	Uncharacterized protein OS=Danio rerio GN=gstz1 PE=3 SV=1 - [F1QPV5_DANRE]	24.5287	7.29834	35.19	8	3	catalytic activity; protein binding	cytoplasm	metabolic process	Pf00043; Pf02798	0.893193	0.954707	1.0499	1.06887	0.561023	1.17544	0.101322
O55215	Ribosomal protein S2 OS=Rattus norvegicus GN=LOC100360710 PE=2 SV=1 - [O55215_RAT]	27.2135	9.62744	35.2	3	29	RNA binding; structural molecule activity; protein binding	nucleus; organelle lumen; cytoplasm; ribosome; cytosol	cell organization and biogenesis; metabolic process	Pf00333; Pf03719	0.624787	0.613945	0.615227	0.982647	0.932249	0.984698	0.979714
B0BN81	Ribosomal protein S5, isoform CRA_b OS=Rattus norvegicus GN=Rps5 PE=2 SV=1 - [B0BN81_RAT]	22.8921	9.71533	35.29	7	5	RNA binding; structural molecule activity	cytoplasm; ribosome; cytosol	metabolic process; regulation of biological process	Pf00177	1.10596	0.959982	0.963197	0.868011	0.454556	0.870917	0.340614
B3VPA7	Cysteine-sulfinate decarboxylase OS=Rattus norvegicus GN=Csad PE=2 SV=1 - [B3VPA7_RAT]	55.1795	7.23975	35.29	16	8	catalytic activity	cytoplasm; cytosol	metabolic process	Pf00266; Pf00282; Pf01212	0.437359	0.415953	0.404197	0.951058	0.900836	0.924178	0.630111
D4A830	Protein Ppa2 OS=Rattus norvegicus GN=Ppa2 PE=4 SV=1 - [D4A830_RAT]	37.818	7.1665	35.45	10	1	metal ion binding; catalytic activity	cytoplasm; mitochondrion	metabolic process	Pf00719	0.954096	0.774303	0.840135	0.811557	0.227606	0.880556	0.386739
Q5RK10	60S ribosomal protein L13a OS=Rattus norvegicus GN=Rpl13a PE=2 SV=1 - [Q5RK10_RAT]	23.4314	11.019	35.47	4	3	structural molecule activity	cytoplasm; ribosome; cytosol	metabolic process	Pf00572	0.86261	0.967509	0.844792	1.12161	0.386758	0.979344	0.983141
P38983	40S ribosomal protein SA OS=Rattus norvegicus GN=Rpsa PE=1 SV=3 - [RSSA_RAT]	32.8034	4.86865	35.59	2	3	structural molecule activity; receptor activity; protein binding	extracellular; nucleus; cytoplasm; cytosol; ribosome; membrane	cell organization and biogenesis; metabolic process; transport; cell differentiation	Pf00318	0.770811	0.870906	0.727244	1.12986	0.36348	0.943479	0.750925
I3IRW7	Uncharacterized protein OS=Danio rerio GN=abat PE=3 SV=1 - [I3IRW7_DANRE]	55.6941	7.69385	35.6	12	3	catalytic activity		metabolic process	Pf00202	0.882421	0.881324	0.827054	0.998757	0.856389	0.937256	0.711401
Q6NUW4	Zgc:85829 OS=Danio rerio GN=zgc:85829 PE=2 SV=1 - [Q6NUW4_DANRE]	28.5895	5.37646	35.61	6	5	catalytic activity	cytoplasm		Pf02274	1.11688	1.44203	1.17282	1.29113	0.0898695	1.05009	0.541099
F1M1N4	Alpha-actinin-1 (Fragment) OS=Rattus norvegicus GN=Actn1 PE=2 SV=1 - [F1M1N4_RAT]	99.7473	5.61768	35.64	8	7	protein binding; metal ion binding	membrane		Pf00307; Pf00435; Pf08726; Pf11971	2.31206	2.34033	1.81111	1.01223	0.794843	0.78333	0.0727025
P62828	GTP-binding nuclear protein Ran OS=Rattus norvegicus GN=Ran PE=1 SV=3 - [RAN_RAT]	24.4076	7.48877	35.65	7	4	nucleotide binding; catalytic activity; protein binding	chromosome; nucleus; cytoplasm	cell organization and biogenesis; metabolic process; transport; cell communication; regulation of biological process; response to stimulus; cell differentiation; reproduction; cell division	Pf00025; Pf00071; Pf01926; Pf08477	1.06945	0.840344	0.885902	0.785769	0.153635	0.828369	0.176781
P05369	Farnesyl pyrophosphate synthase OS=Rattus norvegicus GN=Fdps PE=2 SV=2 - [FPPS_RAT]	40.8039	5.42725	35.69	11	5	catalytic activity; metal ion binding	nucleus; organelle lumen; cytoplasm; mitochondrion	metabolic process; reproduction; development; response to stimulus; regulation of biological process; cell differentiation; cell growth; cell organization and biogenesis	Pf00348	0.506503	0.424717	0.406806	0.838528	0.325338	0.803166	0.110467
F1QJC1	Uncharacterized protein OS=Danio rerio GN=dhrs9 PE=2 SV=1 - [F1QJC1_DANRE]	35.6508	8.66064	35.74	9	2	nucleotide binding; catalytic activity		metabolic process	Pf00106	1.11004	0.993362	1.09525	0.894889	0.58931	0.986676	0.965141
Q76BG3	Phosphoglycerate kinase (Fragment) OS=Ambystoma mexicanum GN=PGK PE=2 SV=1 - [Q76BG3_AMBME]	41.4873	5.94775	35.82	3	1	catalytic activity		metabolic process	Pf00162	0.247558	0.466445	0.479032	1.88419	8.61913e-05	1.93503	6.42494e-10
D3ZTH8	Protein LOC689899 OS=Rattus norvegicus GN=LOC689899 PE=3 SV=1 - [D3ZTH8_RAT]	17.7421	10.3892	35.9	6	17	nucleotide binding; structural molecule activity	cytoplasm; ribosome	metabolic process	Pf00276; Pf03939	0.493446	0.450201	0.461577	0.912363	0.683324	0.935415	0.699803
Q66HF1	NADH-ubiquinone oxidoreductase 75 kDa subunit, mitochondrial OS=Rattus norvegicus GN=Ndufs1 PE=1 SV=1 - [NDUS1_RAT]	79.3616	5.89697	35.9	20	1	catalytic activity; metal ion binding	cytoplasm; mitochondrion; membrane	transport; cell death; metabolic process; cellular homeostasis	Pf00111; Pf00384; Pf09326; Pf10588	0.582044	0.545946	0.60703	0.937981	0.826615	1.04293	0.583126
Q7ZU99	Transitional endoplasmic reticulum ATPase OS=Danio rerio GN=vcp PE=1 SV=1 - [TERA_DANRE]	89.3677	5.26221	35.98	4	6	nucleotide binding; catalytic activity; RNA binding	nucleus; cytoplasm; cytosol; chromosome	metabolic process; response to stimulus; transport; reproduction	Pf00004; Pf00910; Pf01057; Pf01078; Pf02359; Pf02933; Pf05496; Pf05673; Pf06068; Pf07724; Pf07728; Pf09336	1.36668	0.966747	1.10345	0.707369	0.0320517	0.807393	0.120086
P29266	3-hydroxyisobutyrate dehydrogenase, mitochondrial OS=Rattus norvegicus GN=Hibadh PE=1 SV=3 - [3HIDH_RAT]	35.2796	8.47021	36.12	9	1	nucleotide binding; catalytic activity	cytoplasm; mitochondrion	metabolic process; transport	Pf02254; Pf02826; Pf03446; Pf03807	0.62932	0.637201	0.563923	1.01252	0.793513	0.896083	0.467387
A4V6K1	DAZ-associated protein (Fragment) OS=Dugesia japonica PE=2 SV=1 - [A4V6K1_DUGJA]	32.8267	8.17725	36.15	8	2	nucleotide binding			Pf00076	1.94025	1.79448	1.97237	0.924869	0.752709	1.01655	0.752404
P35213	14-3-3 protein beta/alpha OS=Rattus norvegicus GN=Ywhab PE=1 SV=3 - [1433B_RAT]	28.0368	4.88135	36.18	3	5	protein binding	nucleus; cytoplasm; cytoskeleton; cytosol; organelle lumen	transport; metabolic process; regulation of biological process; cell organization and biogenesis	Pf00244	1.00278	1.01467	0.762007	1.01186	0.796512	0.759897	0.0417618
Q08BV6	Uncharacterized protein OS=Danio rerio GN=ckba PE=2 SV=1 - [Q08BV6_DANRE]	42.8388	7.82568	36.22	5	3	nucleotide binding; catalytic activity		metabolic process	Pf00217; Pf02807	1.8444	0.90323	1.32187	0.489716	3.28698e-06	0.716694	0.0123935
P11240	Cytochrome c oxidase subunit 5A, mitochondrial OS=Rattus norvegicus GN=Cox5a PE=1 SV=1 - [COX5A_RAT]	16.1193	6.53662	36.3	3	1	catalytic activity; transporter activity; metal ion binding	cytoplasm; mitochondrion; membrane		Pf02284	1.07106	0.932829	1.06665	0.870938	0.468527	0.995877	0.897937
P62912	60S ribosomal protein L32 OS=Rattus norvegicus GN=Rpl32 PE=1 SV=2 - [RL32_RAT]	15.8498	11.3267	36.3	5	7	structural molecule activity	cytoplasm; ribosome; cytosol	metabolic process	Pf01655	1.08539	1.03216	1.00704	0.950958	0.900268	0.927819	0.652466
Q7ZUM0	Tyrosine 3-monooxygenase/tryptophan 5-monooxygenase activation protein, theta polypeptide a OS=Danio rerio GN=ywhaqa PE=2 SV=1 - [Q7ZUM0_DANRE]	27.7467	4.7417	36.33	3	5	catalytic activity; protein binding			Pf00244	1.0505	0.940934	1.14841	0.895699	0.593573	1.0932	0.328223
Q4QQW7	Cytochrome P450, family 2, subfamily c, polypeptide 7 OS=Rattus norvegicus GN=Cyp2c7 PE=2 SV=1 - [Q4QQW7_RAT]	56.1366	8.44092	36.33	15	3	catalytic activity; metal ion binding	cytoplasm; endoplasmic reticulum; membrane	response to stimulus; metabolic process	Pf00067	0.604007	0.544348	0.593475	0.901227	0.622936	0.982564	0.995486
E9PTJ4	Glycine cleavage system H protein, mitochondrial OS=Rattus norvegicus GN=Gcsh PE=2 SV=1 - [E9PTJ4_RAT]	18.1733	6.03662	36.36	3	3		cytoplasm	metabolic process	Pf01597	0.635002	0.639729	0.570221	1.00744	0.816483	0.897983	0.477759
Q920D2	Dihydrofolate reductase OS=Rattus norvegicus GN=Dhfr PE=2 SV=3 - [DYR_RAT]	21.6242	7.32764	36.36	4	1	RNA binding; catalytic activity; nucleotide binding		metabolic process; response to stimulus	Pf00186	0.565559	0.514949	0.505306	0.910513	0.673192	0.893464	0.453266
F1R826	Uncharacterized protein OS=Danio rerio GN=gstt1b PE=2 SV=1 - [F1R826_DANRE]	28.0546	6.69775	36.36	6	2	protein binding			Pf00043; Pf02798	1.09206	0.976412	1.09	0.8941	0.585172	0.998113	0.88179
E9QG86	Uncharacterized protein OS=Danio rerio GN=zgc:153867 PE=2 SV=1 - [E9QG86_DANRE]	16.9223	4.65283	36.42	2	12	metal ion binding				0.980258	0.980972	0.855276	1.00073	0.847267	0.872501	0.347975
G3V6R5	Sulfite oxidase OS=Rattus norvegicus GN=Suox PE=4 SV=1 - [G3V6R5_RAT]	60.7678	6.80029	36.45	14	2	catalytic activity; metal ion binding	cytoplasm; mitochondrion; cytosol	metabolic process; response to stimulus	Pf00173; Pf00174; Pf03404	0.917085	0.921582	0.805532	1.0049	0.828072	0.878361	0.375961
A3KMH5	Zgc:158138 protein OS=Danio rerio GN=hadhab PE=2 SV=1 - [A3KMH5_DANRE]	82.8353	9.01221	36.57	15	6	nucleotide binding; catalytic activity	cytoplasm; mitochondrion; organelle lumen	metabolic process	Pf00378; Pf00725; Pf02737	1.30948	1.18875	1.29482	0.9078	0.658396	0.988805	0.949495
Q64428	Trifunctional enzyme subunit alpha, mitochondrial OS=Rattus norvegicus GN=Hadha PE=1 SV=2 - [ECHA_RAT]	82.6125	9.05615	36.57	20	3	nucleotide binding; catalytic activity; protein binding	nucleus; organelle lumen; cytoplasm; mitochondrion; membrane	metabolic process; response to stimulus	Pf00378; Pf00725; Pf02737	0.574472	0.395584	0.476768	0.688604	0.0199571	0.829923	0.181601
Q5XIH3	NADH dehydrogenase (Ubiquinone) flavoprotein 1 OS=Rattus norvegicus GN=Ndufv1 PE=2 SV=1 - [Q5XIH3_RAT]	50.6986	8.07471	36.64	10	3	catalytic activity; nucleotide binding	cytoplasm; mitochondrion; membrane	metabolic process	Pf01512; Pf10531; Pf10589	1.32965	1.37953	1.3412	1.03751	0.685018	1.00869	0.806671
P04904	Glutathione S-transferase alpha-3 OS=Rattus norvegicus GN=Gsta3 PE=1 SV=3 - [GSTA3_RAT]	25.3033	8.74854	36.65	2	4	catalytic activity; protein binding	nucleus; membrane; cytoplasm; cytosol	metabolic process; response to stimulus	Pf00043; Pf02798	0.477073	0.474204	0.403475	0.993984	0.87863	0.845729	0.235615
Q7ZV49	Hprt1 protein OS=Danio rerio GN=hprt1 PE=2 SV=1 - [Q7ZV49_DANRE]	24.6827	6.68311	36.7	2	1	metal ion binding; catalytic activity	cytoplasm; cytosol	metabolic process	Pf00156	1.31605	1.19548	1.17181	0.908384	0.661576	0.890401	0.43701
P62282	40S ribosomal protein S11 OS=Rattus norvegicus GN=Rps11 PE=1 SV=3 - [RS11_RAT]	18.419	10.3013	36.71	4	5	RNA binding; structural molecule activity	cytoplasm; ribosome; cytosol	metabolic process	Pf00366	1.1205	0.924231	1.15684	0.824837	0.273149	1.03243	0.647937
Q6P102	Tyrosine 3-monooxygenase/tryptophan 5-monooxygenase activation protein, beta polypeptide like OS=Danio rerio GN=ywhabl PE=2 SV=1 - [Q6P102_DANRE]	27.8899	4.77979	36.73	4	3	catalytic activity; protein binding			Pf00244	1.2148	1.47911	1.08057	1.21757	0.177034	0.889499	0.432277
O08557	N(G),N(G)-dimethylarginine dimethylaminohydrolase 1 OS=Rattus norvegicus GN=Ddah1 PE=1 SV=3 - [DDAH1_RAT]	31.4059	6.12549	36.84	7	5	catalytic activity; metal ion binding	cytoplasm; mitochondrion	metabolic process; regulation of biological process; development	Pf02274	0.615579	0.500585	0.606007	0.813193	0.232944	0.984451	0.981539
P02650	Apolipoprotein E OS=Rattus norvegicus GN=Apoe PE=1 SV=2 - [APOE_RAT]	35.7313	5.2749	36.86	11	2	transporter activity; antioxidant activity; catalytic activity; protein binding; metal ion binding; enzyme regulator activity	extracellular; cytoplasm; endosome; Golgi; cytoskeleton; membrane; cell surface	cell proliferation; regulation of biological process; response to stimulus; metabolic process; transport; cellular homeostasis; cell death; cell communication; coagulation; cell differentiation; cell organization and biogenesis; development; cellular component movement; cell growth; defense response	Pf01442; Pf10186	0.361613	0.456011	0.357802	1.26105	0.119474	0.989461	0.944686
D4A3V2	NADH dehydrogenase (Ubiquinone) 1 alpha subcomplex, 6 (B14) (Predicted) OS=Rattus norvegicus GN=Ndufa6 PE=4 SV=1 - [D4A3V2_RAT]	15.2141	10.1548	36.92	4	1		cytoplasm; mitochondrion; membrane	transport; response to stimulus; metabolic process	Pf05347	0.320551	0.223081	0.25173	0.69593	0.0241354	0.785305	0.0759473
P70580	Membrane-associated progesterone receptor component 1 OS=Rattus norvegicus GN=Pgrmc1 PE=1 SV=3 - [PGRC1_RAT]	21.5847	4.60205	36.92	5	2		nucleus; organelle lumen; cytoplasm; endoplasmic reticulum; membrane; cell surface	cell differentiation; cell organization and biogenesis; development; response to stimulus	Pf00173	0.490969	0.448043	0.421283	0.912569	0.684459	0.858066	0.284163
Q6P3V8	Eukaryotic translation initiation factor 4A1 OS=Rattus norvegicus GN=Eif4a1 PE=2 SV=1 - [Q6P3V8_RAT]	46.1246	5.47803	36.95	6	2	nucleotide binding; RNA binding; catalytic activity	cytoplasm	metabolic process; development	Pf00270; Pf00271; Pf00579	0.728964	1.15021	0.730756	1.57787	0.00398241	1.00246	0.850661
Q8UVG6	Cellular retinol-binding protein type II OS=Danio rerio GN=rbp2a PE=1 SV=1 - [Q8UVG6_DANRE]	15.796	6.53662	37.04	4	2	transporter activity		transport	Pf00061	0.853629	0.947923	0.768208	1.11046	0.419903	0.899932	0.488502
P24329	Thiosulfate sulfurtransferase OS=Rattus norvegicus GN=Tst PE=1 SV=3 - [THTR_RAT]	33.3858	7.85498	37.04	11	2	RNA binding; catalytic activity	cytoplasm; mitochondrion; membrane; organelle lumen	cell organization and biogenesis; transport	Pf00581	0.601947	0.535684	0.58576	0.889919	0.563383	0.973108	0.942711
P50399	Rab GDP dissociation inhibitor beta OS=Rattus norvegicus GN=Gdi2 PE=1 SV=2 - [GDIB_RAT]	50.5047	6.25244	37.08	7	5	enzyme regulator activity; protein binding	cytoplasm; Golgi; cytosol; cell surface; membrane	cell communication; regulation of biological process; response to stimulus; transport; metabolic process	Pf00996	0.448136	0.611061	0.537591	1.36356	0.0435728	1.19962	0.0681591
G3V826	Transketolase OS=Rattus norvegicus GN=Tkt PE=4 SV=1 - [G3V826_RAT]	71.1133	7.62061	37.1	20	3	metal ion binding; catalytic activity; protein binding	nucleus; organelle lumen; cytoplasm; endoplasmic reticulum; membrane	metabolic process; regulation of biological process	Pf00456; Pf00676; Pf02779; Pf02780; Pf09364	0.548756	0.485281	0.566564	0.884329	0.534727	1.03245	0.647791
A5HUF0	Clathrin heavy chain OS=Dugesia japonica GN=DjCHC PE=2 SV=1 - [A5HUF0_DUGJA]	191.895	5.8208	37.16	39	2	structural molecule activity; protein binding	cytoplasm; membrane; Golgi	transport	Pf00637; Pf01394; Pf04053; Pf09268	1.8412	1.72577	1.9704	0.937311	0.822824	1.07018	0.433173
D4ABR6	Annexin OS=Rattus norvegicus GN=Anxa6 PE=2 SV=1 - [D4ABR6_RAT]	75.1121	5.61768	37.18	22	7	metal ion binding			Pf00191; Pf02181	0.866959	0.956479	0.680953	1.10326	0.442382	0.785451	0.0761916
F1LP83	Tropomyosin beta chain OS=Rattus norvegicus GN=Tpm2 PE=2 SV=1 - [F1LP83_RAT]	32.7206	4.66553	37.32	3	5	structural molecule activity; transporter activity; protein binding	membrane	transport; cell communication; regulation of biological process; response to stimulus	Pf00261; Pf12718	1.16815	1.87109	1.22866	1.60176	0.0029951	1.0518	0.531312
Q68FZ8	Propionyl coenzyme A carboxylase, beta polypeptide OS=Rattus norvegicus GN=Pccb PE=2 SV=1 - [Q68FZ8_RAT]	58.6411	7.84033	37.34	11	3	catalytic activity; nucleotide binding	cytoplasm; mitochondrion; organelle lumen	metabolic process	Pf01039	0.693076	0.562815	0.486711	0.812053	0.229217	0.702248	0.00775772
P60901	Proteasome subunit alpha type-6 OS=Rattus norvegicus GN=Psma6 PE=1 SV=1 - [PSA6_RAT]	27.3818	6.75635	37.4	3	3	RNA binding; catalytic activity; protein binding	proteasome; nucleus; cytoplasm; mitochondrion; organelle lumen	metabolic process; regulation of biological process	Pf00227; Pf10584	0.412865	0.338321	0.344611	0.819448	0.254059	0.834684	0.196904
Q7T3L3	Chaperone protein GP96 OS=Danio rerio GN=hsp90b1 PE=2 SV=1 - [Q7T3L3_DANRE]	91.2249	4.85596	37.45	14	1	nucleotide binding; protein binding	cytoplasm	metabolic process; response to stimulus; development	Pf00183; Pf02518	0.937643	0.973198	1.03214	1.03792	0.683321	1.10078	0.298052
O96062	Myosin heavy chain OS=Dugesia japonica GN=DjMHC-A PE=2 SV=1 - [O96062_DUGJA]	224.719	5.73193	37.49	42	2	nucleotide binding; catalytic activity; motor activity; protein binding	chromosome; nucleus; organelle lumen; cytoplasm; cytoskeleton; membrane	cell organization and biogenesis; reproduction; metabolic process; regulation of biological process	Pf00038; Pf00063; Pf01576; Pf02463; Pf02736; Pf04156; Pf04899; Pf05483; Pf05622; Pf06160; Pf07888; Pf09726; Pf10186; Pf11932; Pf12128; Pf12718	2.07698	2.18324	2.17469	1.05116	0.62927	1.04704	0.558743
D3ZSC6	Protein Rab2b OS=Rattus norvegicus GN=Rab2b PE=2 SV=1 - [D3ZSC6_RAT]	21.3646	6.53662	37.5	6	5	nucleotide binding	nucleus; cytoplasm	cell communication; regulation of biological process; response to stimulus; transport	Pf00025; Pf00071; Pf04670; Pf08477	1.53711	1.56598	1.71797	1.01879	0.765597	1.11767	0.23827
E9QFD2	Uricase OS=Danio rerio GN=uox PE=2 SV=1 - [E9QFD2_DANRE]	28.6849	7.89893	37.5	8	3	catalytic activity	cytoplasm	metabolic process	Pf01014; Pf02152	1.09712	1.03549	1.061	0.943824	0.859758	0.967073	0.903478
F1LSR9	Alcohol dehydrogenase 1 OS=Rattus norvegicus GN=Adh1 PE=2 SV=1 - [F1LSR9_RAT]	39.9686	8.14795	37.5	14	5	nucleotide binding; metal ion binding; catalytic activity; protein binding	cytoplasm; mitochondrion; membrane	metabolic process; response to stimulus	Pf00107; Pf08240	0.36853	0.259493	0.283513	0.70413	0.0296248	0.769306	0.052604
Q6AYS2	RCG24191 OS=Rattus norvegicus GN=Sfxn1 PE=2 SV=1 - [Q6AYS2_RAT]	35.5653	9.0708	37.58	9	2	transporter activity	cytoplasm; mitochondrion; membrane	transport; cell differentiation; development	Pf03820	0.567998	0.813478	0.588064	1.43218	0.0210041	1.03533	0.629684
B8JM34	Uncharacterized protein OS=Danio rerio GN=atp5j PE=4 SV=1 - [B8JM34_DANRE]	12.0044	9.74463	37.61	4	2	transporter activity	cytoplasm; membrane; mitochondrion	transport; metabolic process	Pf05511	0.767935	0.768084	0.828196	1.0002	0.849731	1.07847	0.393036
G3V734	2,4-dienoyl CoA reductase 1, mitochondrial, isoform CRA_a OS=Rattus norvegicus GN=Decr1 PE=4 SV=1 - [G3V734_RAT]	36.1097	8.93896	37.61	8	2	nucleotide binding; catalytic activity	nucleus; organelle lumen; cytoplasm; mitochondrion	metabolic process; cell organization and biogenesis	Pf00106; Pf00148; Pf08659	0.72112	0.552747	0.594317	0.766511	0.110475	0.824159	0.164166
Q07523	Hydroxyacid oxidase 2 OS=Rattus norvegicus GN=Hao2 PE=1 SV=2 - [HAOX2_RAT]	39.1764	7.63525	37.68	12	1	catalytic activity; protein binding; nucleotide binding	cytoplasm; mitochondrion	metabolic process; cell organization and biogenesis	Pf00478; Pf01070; Pf01645	0.882467	0.85393	0.757159	0.967662	0.994778	0.858002	0.283899
F1LQS4	ATP-citrate synthase OS=Rattus norvegicus GN=Acly PE=2 SV=1 - [F1LQS4_RAT]	120.466	7.34229	37.73	21	6	nucleotide binding; catalytic activity	cytoplasm; membrane	metabolic process	Pf00285; Pf00549; Pf02629	0.571002	0.477859	0.493865	0.836878	0.318771	0.86491	0.313491
P11348	Dihydropteridine reductase OS=Rattus norvegicus GN=Qdpr PE=1 SV=1 - [DHPR_RAT]	25.5359	7.81104	37.76	6	4	nucleotide binding; catalytic activity; protein binding	cytoplasm; mitochondrion; cytosol	development; metabolic process; response to stimulus		0.789146	0.730871	0.76653	0.926154	0.759914	0.971341	0.931233
O89035	Mitochondrial dicarboxylate carrier OS=Rattus norvegicus GN=Slc25a10 PE=2 SV=1 - [O89035_RAT]	31.4341	9.29053	37.76	8	2	transporter activity	nucleus; organelle lumen; cytoplasm; mitochondrion; membrane	transport	Pf00153	0.853706	0.716569	0.659139	0.839362	0.328685	0.772091	0.0562024
O76154	Na+/K+-ATPase alpha-subunit OS=Dugesia japonica GN=Djnak PE=2 SV=1 - [O76154_DUGJA]	113.39	5.84619	37.77	23	11	nucleotide binding; catalytic activity; transporter activity; metal ion binding	membrane	metabolic process; transport	Pf00122; Pf00689; Pf00690; Pf00702; Pf08282	1.96925	1.87269	1.98204	0.950969	0.900332	1.0065	0.822055
Q63569	26S protease regulatory subunit 6A OS=Rattus norvegicus GN=Psmc3 PE=2 SV=1 - [PRS6A_RAT]	49.1294	5.23682	37.81	13	7	nucleotide binding; protein binding; catalytic activity	proteasome; nucleus; cytoplasm	development; metabolic process; response to stimulus	Pf00004; Pf01078; Pf05496; Pf07724; Pf07728	1.10908	1.09653	1.12077	0.988683	0.90357	1.01055	0.793729
D4A1W8	Microsomal triglyceride transfer protein OS=Rattus norvegicus GN=Mttp PE=4 SV=1 - [D4A1W8_RAT]	99.1246	7.6499	37.83	27	1	transporter activity; protein binding	cytoplasm; endoplasmic reticulum; Golgi; membrane	metabolic process; transport; response to stimulus	Pf01347	0.84119	0.733458	0.764966	0.871928	0.473296	0.909385	0.542053
B2RYT7	Haloacid dehalogenase-like hydrolase domain containing 3 OS=Rattus norvegicus GN=Hdhd3 PE=2 SV=1 - [B2RYT7_RAT]	27.7763	7.00537	37.85	8	1	catalytic activity	cytoplasm; mitochondrion	metabolic process	Pf00702	1.03667	1.00411	1.19272	0.968591	1	1.15052	0.148947
F1LZJ4	Uncharacterized protein (Fragment) OS=Rattus norvegicus GN=Hyi PE=4 SV=1 - [F1LZJ4_RAT]	15.3998	5.22412	37.86	3	1				Pf01261	0.696537	0.67356	0.645184	0.967012	0.99112	0.926273	0.642946
F1AGC2	Hsp60 (Fragment) OS=Schmidtea mediterranea PE=2 SV=1 - [F1AGC2_SCHMD]	18.2005	5.19873	37.87	6	1	nucleotide binding	cytoplasm	metabolic process	Pf00118	2.04467	1.96288	2.16505	0.960003	0.951555	1.05888	0.492035
O02572	Enolase (Fragment) OS=Dugesia cf. dorotocephala PE=2 SV=1 - [O02572_9TURB]	17.1231	8.99756	37.89	4	1	metal ion binding; catalytic activity	cytoplasm; cytosol	metabolic process	Pf00113; Pf03952	1.90757	1.34241	1.83612	0.703727	0.0293338	0.962544	0.874025
Q803M1	Tropomyosin 3 OS=Danio rerio GN=tpm3 PE=2 SV=1 - [Q803M1_DANRE]	28.8269	4.77979	37.9	2	2				Pf00261; Pf12718	1.19909	1.45158	1.10895	1.21057	0.188207	0.92483	0.634098
O70199	UDP-glucose 6-dehydrogenase OS=Rattus norvegicus GN=Ugdh PE=1 SV=1 - [UGDH_RAT]	54.8573	7.54736	37.93	9	1	nucleotide binding; catalytic activity	cytoplasm; cytosol	development; metabolic process	Pf00984; Pf01210; Pf03720; Pf03721	0.660711	0.433308	0.696355	0.65582	0.00781685	1.05395	0.519203
Q803S0	Fumarylacetoacetate hydrolase (Fumarylacetoacetase) OS=Danio rerio GN=fah PE=2 SV=1 - [Q803S0_DANRE]	38.7294	6.68311	37.93	11	3	catalytic activity		metabolic process	Pf01557; Pf09298	1.06675	1.08661	1.00339	1.01861	0.766367	0.940598	0.73257
P05182	Cytochrome P450 2E1 OS=Rattus norvegicus GN=Cyp2e1 PE=1 SV=4 - [CP2E1_RAT]	56.5907	8.39697	37.93	17	4	catalytic activity; metal ion binding; nucleotide binding; protein binding	cytoplasm; Golgi; membrane; mitochondrion; endoplasmic reticulum	metabolic process; response to stimulus	Pf00067	0.758151	0.683376	0.71102	0.901372	0.623709	0.937835	0.715057
Q66HD0	Endoplasmin OS=Rattus norvegicus GN=Hsp90b1 PE=1 SV=2 - [ENPL_RAT]	92.7134	4.80518	37.94	16	3	nucleotide binding; RNA binding; protein binding	cytoplasm; endoplasmic reticulum; organelle lumen; membrane; cytosol	response to stimulus; metabolic process; cell organization and biogenesis; cell death; regulation of biological process	Pf00183; Pf02518	0.654458	0.601748	0.616736	0.919461	0.722538	0.942362	0.7438
B0LVF7	Heat shock protein 70 OS=Dugesia japonica GN=hsp70 PE=2 SV=1 - [B0LVF7_DUGJA]	71.1402	5.78271	37.96	12	2	nucleotide binding		cell organization and biogenesis; response to stimulus	Pf00012; Pf06723	1.96483	1.93732	2.16613	0.986001	0.91628	1.10245	0.291658
E9QFX0	Uncharacterized protein OS=Danio rerio GN=apoc1l PE=2 SV=1 - [E9QFX0_DANRE]	9.77891	5.41455	38.1	3	2		extracellular	metabolic process	Pf04691	1.06317	0.999081	1.09741	0.939721	0.83648	1.03221	0.649326
Q9WVA1	Mitochondrial import inner membrane translocase subunit Tim8 A OS=Rattus norvegicus GN=Timm8a PE=1 SV=1 - [TIM8A_RAT]	11.0353	5.16064	38.14	3	5	protein binding; metal ion binding	cytoplasm; mitochondrion; membrane	cell organization and biogenesis; transport	Pf02953	0.550258	0.706985	0.619594	1.28482	0.0954739	1.12601	0.212376
P13086	Succinyl-CoA ligase [ADP/GDP-forming] subunit alpha, mitochondrial OS=Rattus norvegicus GN=Suclg1 PE=2 SV=2 - [SUCA_RAT]	36.125	9.48096	38.15	7	2	nucleotide binding; catalytic activity; protein binding	cytoplasm; mitochondrion; membrane; organelle lumen	metabolic process	Pf00549; Pf02629	0.510661	0.45263	0.497443	0.886361	0.54508	0.974115	0.949249
P63245	Guanine nucleotide-binding protein subunit beta-2-like 1 OS=Rattus norvegicus GN=Gnb2l1 PE=1 SV=3 - [GBLP_RAT]	35.0546	7.69385	38.17	6	1	protein binding; enzyme regulator activity	membrane; nucleus; cytoplasm; cytoskeleton; ribosome	metabolic process; regulation of biological process; cell death; cell communication; response to stimulus; development; cell growth; cell organization and biogenesis; cellular component movement; transport; cell division	Pf00400	0.721044	0.607086	0.66108	0.841954	0.339204	0.916837	0.585822
Q33CJ2	Beta globin (Fragment) OS=Cynops pyrrhogaster PE=3 SV=1 - [Q33CJ2_CYNPY]	7.69982	7.10791	38.24	2	2	transporter activity; metal ion binding	cytoplasm; cytosol	transport		0.572582	0.780955	0.758032	1.36392	0.0434124	1.32388	0.00649073
G3V6P7	Myosin, heavy polypeptide 9, non-muscle OS=Rattus norvegicus GN=Myh9 PE=4 SV=1 - [G3V6P7_RAT]	226.273	5.65576	38.27	39	14	catalytic activity; motor activity; nucleotide binding; protein binding; transporter activity	cytoskeleton; membrane; nucleus; cytoplasm; endosome; cytosol; mitochondrion	cell organization and biogenesis; reproduction; cell differentiation; cell division; development; metabolic process; cellular component movement; regulation of biological process; cellular homeostasis; transport	Pf00038; Pf00063; Pf01496; Pf01576; Pf01765; Pf02463; Pf02736; Pf03962; Pf04156; Pf05266; Pf05622; Pf05911; Pf06637; Pf07888; Pf09726; Pf09731; Pf11559; Pf12128	0.789552	0.752631	0.65514	0.953237	0.913209	0.829761	0.181093
P10633	Cytochrome P450 2D1 OS=Rattus norvegicus GN=Cyp2d1 PE=2 SV=1 - [CP2D1_RAT]	57.1385	7.29834	38.29	3	1	catalytic activity; metal ion binding	cytoplasm; endoplasmic reticulum; membrane	response to stimulus; metabolic process	Pf00067	1.1134	1.13813	0.995622	1.02221	0.750513	0.89422	0.457321
Q63010	Liver carboxylesterase B-1 OS=Rattus norvegicus PE=1 SV=1 - [EST5_RAT]	62.4547	6.7124	38.32	7	3	catalytic activity	cytoplasm; endoplasmic reticulum; organelle lumen	metabolic process	Pf00135; Pf00326; Pf07859	0.993975	0.913953	1.06067	0.919493	0.722719	1.0671	0.448722
D3ZZU0	Actin related protein 2/3 complex, subunit 2 (Predicted), isoform CRA_a OS=Rattus norvegicus GN=Arpc2 PE=4 SV=1 - [D3ZZU0_RAT]	34.3255	7.35693	38.33	12	3	protein binding	cytoplasm; endosome; Golgi; cytoskeleton; membrane	cell organization and biogenesis; regulation of biological process; cell differentiation	Pf04045	1.0171	1.21551	1.01119	1.19508	0.215002	0.994195	0.910133
P62247	40S ribosomal protein S8 OS=Danio rerio GN=rps8 PE=2 SV=2 - [RS8_DANRE]	24.0783	10.521	38.46	2	5	structural molecule activity	cytoplasm; ribosome; cytosol	metabolic process; development; regulation of biological process	Pf01201	1.09401	1.02949	1.17631	0.941024	0.843864	1.07524	0.408385
P52847	Sulfotransferase family cytosolic 1B member 1 OS=Rattus norvegicus GN=Sult1b1 PE=1 SV=2 - [ST1B1_RAT]	34.8128	8.104	38.46	9	1	catalytic activity	cytoplasm; cytosol	metabolic process; response to stimulus	Pf00685	0.555958	0.398238	0.481109	0.716309	0.0395807	0.865369	0.315521
P63331	Serine/threonine-protein phosphatase 2A catalytic subunit alpha isoform OS=Rattus norvegicus GN=Ppp2ca PE=1 SV=1 - [PP2AA_RAT]	35.5854	5.5415	38.51	9	8	catalytic activity; protein binding; metal ion binding	chromosome; cytoskeleton; nucleus; cytoplasm; cytosol; membrane	metabolic process; regulation of biological process; reproduction; cell communication; response to stimulus; cell differentiation; cell organization and biogenesis; development	Pf00149	1.34571	1.38392	1.59771	1.02839	0.723695	1.18727	0.0836896
P13444	S-adenosylmethionine synthase isoform type-1 OS=Rattus norvegicus GN=Mat1a PE=1 SV=2 - [METK1_RAT]	43.6701	5.94775	38.54	3	4	nucleotide binding; metal ion binding; catalytic activity; protein binding		metabolic process; cell organization and biogenesis	Pf00438; Pf02772; Pf02773	1.07288	1.05802	1.11744	0.986148	0.915583	1.04153	0.591549
P20070	NADH-cytochrome b5 reductase 3 OS=Rattus norvegicus GN=Cyb5r3 PE=1 SV=2 - [NB5R3_RAT]	34.1527	8.38232	38.54	9	1	catalytic activity; nucleotide binding	cytoplasm; mitochondrion; membrane; endoplasmic reticulum	metabolic process	Pf00175; Pf00970	0.896322	0.887042	0.833937	0.989647	0.899019	0.930399	0.668443
Q62636	Ras-related protein Rap-1b OS=Rattus norvegicus GN=Rap1b PE=2 SV=2 - [RAP1B_RAT]	20.7846	5.78271	38.59	6	7	nucleotide binding; catalytic activity	cytoplasm; cytosol; membrane	metabolic process; cell communication; regulation of biological process; response to stimulus; cell proliferation	Pf00071; Pf08477	1.72081	1.49545	1.73765	0.869039	0.459439	1.00978	0.799045
B8A4B0	Uncharacterized protein OS=Danio rerio GN=glud1a PE=4 SV=1 - [B8A4B0_DANRE]	60.1035	7.95752	38.6	3	2	nucleotide binding; catalytic activity		metabolic process	Pf00208; Pf02812	1.68161	1.61623	1.69801	0.961118	0.957862	1.00975	0.799256
B0BMW0	RAB14, member RAS oncogene family OS=Rattus norvegicus GN=Rab14 PE=2 SV=1 - [B0BMW0_RAT]	23.8819	6.21436	38.6	7	49	nucleotide binding; protein binding; catalytic activity	cytoplasm; Golgi; membrane; nucleus; vacuole; endosome; endoplasmic reticulum; cytosol	metabolic process; transport; cell communication; regulation of biological process; response to stimulus; development	Pf00009; Pf00025; Pf00071; Pf04670; Pf08477	1.29639	1.23094	1.36641	0.949514	0.892067	1.05401	0.518837
P12939	Cytochrome P450 2D10 OS=Rattus norvegicus GN=Cyp2d10 PE=2 SV=1 - [CP2DA_RAT]	57.0393	6.80029	38.69	2	2	catalytic activity; metal ion binding	cytoplasm; endoplasmic reticulum; membrane	metabolic process	Pf00067	0.359788	0.26534	0.276146	0.737491	0.0629817	0.767525	0.0503988
E9QHB7	Uncharacterized protein OS=Danio rerio GN=rpl17 PE=2 SV=1 - [E9QHB7_DANRE]	17.8183	10.4624	38.71	7	14	structural molecule activity	cytoplasm; ribosome	metabolic process	Pf00237	0.831122	0.823008	0.74584	0.990237	0.896236	0.897389	0.474508
G3V796	Acetyl-Coenzyme A dehydrogenase, medium chain OS=Rattus norvegicus GN=Acadm PE=3 SV=1 - [G3V796_RAT]	46.5418	8.41162	38.72	9	2	catalytic activity; protein binding	cytoplasm; mitochondrion; organelle lumen; membrane	development; metabolic process; regulation of biological process; response to stimulus; cell organization and biogenesis; cell differentiation	Pf00441; Pf02770; Pf02771; Pf08028; Pf11794	0.759305	0.691543	0.719009	0.910757	0.674526	0.94693	0.77302
P85834	Elongation factor Tu, mitochondrial OS=Rattus norvegicus GN=Tufm PE=1 SV=1 - [EFTU_RAT]	49.491	7.56201	38.72	14	2	nucleotide binding; RNA binding; catalytic activity	cytoplasm; mitochondrion; membrane; organelle lumen	metabolic process	Pf00009; Pf03143; Pf03144	0.827769	0.771731	0.791224	0.932303	0.794508	0.955851	0.830578
P63326	40S ribosomal protein S10 OS=Rattus norvegicus GN=Rps10 PE=2 SV=1 - [RS10_RAT]	18.9038	10.1548	38.79	4	14	structural molecule activity	nucleus; organelle lumen; cytoplasm; ribosome; cytosol	cell organization and biogenesis	Pf03501	1.07113	1.15962	1.01204	1.08262	0.51136	0.944836	0.759601
P50170	Retinol dehydrogenase 2 OS=Rattus norvegicus GN=Rdh2 PE=1 SV=1 - [RDH2_RAT]	35.5743	8.646	38.8	4	6	nucleotide binding; catalytic activity	cytoplasm; endoplasmic reticulum	metabolic process	Pf00106; Pf08643	0.36496	0.503739	0.309686	1.38026	0.0366189	0.848546	0.246208
F1QDB3	Uncharacterized protein OS=Danio rerio GN=zgc:92630 PE=2 SV=1 - [F1QDB3_DANRE]	27.784	6.85889	38.82	6	5	nucleotide binding; catalytic activity	membrane	metabolic process	Pf00106; Pf08659	1.01875	1.09923	0.946792	1.079	0.524139	0.929366	0.66203
P35435	ATP synthase subunit gamma, mitochondrial OS=Rattus norvegicus GN=Atp5c1 PE=1 SV=2 - [ATPG_RAT]	30.1717	8.83643	38.83	7	3	catalytic activity; transporter activity	cytoplasm; membrane; mitochondrion	metabolic process; transport	Pf00231	1.14666	1.57468	0.862832	1.37327	0.0393944	0.752471	0.0345262
F1LQI1	Hydroxyacylglutathione hydrolase, mitochondrial OS=Rattus norvegicus GN=Hagh PE=2 SV=1 - [F1LQI1_RAT]	28.9268	7.12256	38.85	8	3	catalytic activity; metal ion binding	cytoplasm; mitochondrion	metabolic process	Pf00753	0.817277	0.933852	0.699108	1.14264	0.329494	0.855411	0.273245
F1QXP5	Uncharacterized protein OS=Danio rerio GN=mthfd1b PE=2 SV=1 - [F1QXP5_DANRE]	100.458	7.63525	38.87	21	6	nucleotide binding; catalytic activity	membrane	metabolic process	Pf00763; Pf01268; Pf02882	1.09552	1.09246	1.07642	0.997204	0.863602	0.982569	0.995447
P24368	Peptidyl-prolyl cis-trans isomerase B OS=Rattus norvegicus GN=Ppib PE=2 SV=3 - [PPIB_RAT]	23.7875	9.49561	38.89	5	7	catalytic activity	cytoplasm; endoplasmic reticulum; organelle lumen	metabolic process; transport	Pf00160	0.684642	0.527177	0.650548	0.770004	0.117571	0.950202	0.794067
Q6DGK2	L-lactate dehydrogenase B-B chain OS=Danio rerio GN=ldhbb PE=2 SV=1 - [LDHBB_DANRE]	36.6863	8.48486	38.92	7	5	nucleotide binding; catalytic activity	cytoplasm	metabolic process	Pf00056; Pf02866	0.882874	0.877399	0.898037	0.993798	0.879501	1.01717	0.748185
P18666	Myosin regulatory light chain 12B OS=Rattus norvegicus GN=Myl12b PE=1 SV=3 - [ML12B_RAT]	19.8256	4.90674	38.95	2	8	metal ion binding	cytoskeleton; cytoplasm	cell organization and biogenesis; regulation of biological process	Pf00036	0.51418	0.483352	0.456071	0.940045	0.838313	0.886986	0.419227
E7EZ16	Heat shock protein HSP 90-beta OS=Danio rerio GN=hsp90ab1 PE=3 SV=1 - [E7EZ16_DANRE]	81.5162	5.09717	39.01	9	2	nucleotide binding; protein binding	cytoplasm; membrane	metabolic process; response to stimulus	Pf00183; Pf02518	1.29473	1.24214	1.24236	0.959382	0.948046	0.959551	0.85458
D3ZSC4	Protein LOC100360057 OS=Rattus norvegicus GN=LOC100360057 PE=4 SV=1 - [D3ZSC4_RAT]	14.7368	9.18799	39.06	3	6	structural molecule activity	cytoplasm; ribosome	metabolic process; cell differentiation; development	Pf01776	0.932197	1.00074	0.724317	1.07352	0.543878	0.777	0.0630083
P11030	Acyl-CoA-binding protein OS=Rattus norvegicus GN=Dbi PE=1 SV=3 - [ACBP_RAT]	10.0212	8.82178	39.08	2	2	protein binding	extracellular; nucleus; cytoplasm; mitochondrion; endoplasmic reticulum; Golgi; membrane	development; metabolic process; transport; cell differentiation; cell proliferation; cell communication; response to stimulus; regulation of biological process; cellular homeostasis	Pf00887	0.498779	0.472804	0.450966	0.947922	0.883026	0.904139	0.512046
Q2TL58	Serine hydroxymethyltransferase OS=Danio rerio GN=shmt1 PE=2 SV=1 - [Q2TL58_DANRE]	53.2871	7.88428	39.09	12	7	catalytic activity	nucleus; cytoplasm; cytosol	metabolic process	Pf00155; Pf00464	1.00718	0.879006	0.935833	0.872737	0.477206	0.929159	0.660751
P12007	Isovaleryl-CoA dehydrogenase, mitochondrial OS=Rattus norvegicus GN=Ivd PE=1 SV=2 - [IVD_RAT]	46.4058	7.89893	39.15	13	1	catalytic activity	cytoplasm; mitochondrion; organelle lumen; membrane	metabolic process; cell organization and biogenesis	Pf00441; Pf02770; Pf02771; Pf08028	0.531835	0.624066	0.508558	1.17342	0.257632	0.956234	0.833062
P61983	14-3-3 protein gamma OS=Rattus norvegicus GN=Ywhag PE=1 SV=2 - [1433G_RAT]	28.2849	4.89404	39.27	3	7	protein binding; enzyme regulator activity	cytoplasm	transport; cell communication; regulation of biological process; response to stimulus; cell differentiation; development; metabolic process	Pf00244	0.33004	0.337155	0.29025	1.02156	0.753385	0.879438	0.381229
D4AAV1	Protein Amdhd1 OS=Rattus norvegicus GN=Amdhd1 PE=4 SV=1 - [D4AAV1_RAT]	46.5407	6.7417	39.29	12	1	catalytic activity	cytoplasm	metabolic process	Pf07969	1.0879	1.09544	1.25945	1.00694	0.818782	1.1577	0.133639
F1LMG2	S-methylmethionine--homocysteine S-methyltransferase BHMT2 OS=Rattus norvegicus GN=Bhmt2 PE=2 SV=1 - [F1LMG2_RAT]	39.7742	7.13721	39.39	7	2	metal ion binding; catalytic activity	cytoplasm	metabolic process	Pf02574	0.554504	0.403453	0.44061	0.727592	0.0509978	0.794601	0.0927152
Q7ZUY3	Histone H2A.x OS=Danio rerio GN=h2afx PE=2 SV=3 - [H2AX_DANRE]	14.9923	10.7407	39.44	3	23	DNA binding; protein binding	chromosome; nucleus	metabolic process; response to stimulus; cell organization and biogenesis; reproduction	Pf00125; Pf00808	2.1451	0.812081	1.12898	0.378576	1.47637e-10	0.526306	7.31582e-07
Q6VN46	Myoglobin OS=Danio rerio GN=mb PE=2 SV=3 - [MYG_DANRE]	15.5732	7.54736	39.46	4	2	transporter activity; metal ion binding		cell differentiation; development; response to stimulus; transport	Pf00042	1.25292	1.46305	1.0696	1.16771	0.269929	0.853686	0.266286
Q23959	Elongation factor 1-alpha (Fragment) OS=Dugesia japonica PE=2 SV=1 - [Q23959_DUGJA]	44.9971	7.2251	39.56	9	3	nucleotide binding; RNA binding; catalytic activity	cytoplasm	metabolic process	Pf00009; Pf03143; Pf03144	2.26711	2.49759	2.35755	1.10166	0.447477	1.03989	0.601505
P63088	Serine/threonine-protein phosphatase PP1-gamma catalytic subunit OS=Rattus norvegicus GN=Ppp1cc PE=1 SV=1 - [PP1G_RAT]	36.9597	6.53662	39.63	2	11	catalytic activity; protein binding; metal ion binding	chromosome; nucleus; organelle lumen; cytoplasm; mitochondrion; membrane; cytosol	metabolic process; cell differentiation; development; regulation of biological process; transport; cell division	Pf00149	1.79024	1.63543	1.6613	0.913528	0.689727	0.927977	0.65344
Q5XIM9	T-complex protein 1 subunit beta OS=Rattus norvegicus GN=Cct2 PE=1 SV=3 - [TCPB_RAT]	57.4221	6.45557	39.63	11	2	nucleotide binding; protein binding	nucleus; organelle lumen; cytoplasm; cytosol; cytoskeleton	metabolic process; cell organization and biogenesis	Pf00118	0.824476	0.789257	0.803103	0.957283	0.936153	0.974077	0.949003
G3V9Z4	Putative L-aspartate dehydrogenase OS=Rattus norvegicus GN=Aspdh PE=4 SV=1 - [G3V9Z4_RAT]	30.3697	6.84424	39.72	9	2	nucleotide binding; catalytic activity		metabolic process	Pf01958; Pf03447; Pf03807	0.676315	0.687083	0.587573	1.01592	0.778311	0.868786	0.330844
Q1LWH1	Ribosomal protein S16 OS=Danio rerio GN=rps16 PE=2 SV=1 - [Q1LWH1_DANRE]	16.346	10.1401	39.73	2	1	structural molecule activity	cytoplasm; ribosome	metabolic process	Pf00380	0.640279	0.62514	0.704112	0.976355	0.962427	1.0997	0.302231
P62250	40S ribosomal protein S16 OS=Rattus norvegicus GN=Rps16 PE=1 SV=2 - [RS16_RAT]	16.435	10.2134	39.73	2	5	RNA binding; structural molecule activity	cytoplasm; ribosome; cytosol	metabolic process	Pf00380	0.427615	0.455434	0.42276	1.06506	0.575322	0.988648	0.950648
Q6PBW7	Ribosomal protein S19 OS=Danio rerio GN=rps19 PE=2 SV=1 - [Q6PBW7_DANRE]	15.9316	10.228	39.73	4	6	structural molecule activity	cytoplasm; ribosome	metabolic process; development; cell differentiation; regulation of biological process; cell communication; cell death; response to stimulus	Pf01090	0.955157	0.887991	0.932503	0.929681	0.779733	0.976283	0.963313
F1LML3	3-oxo-5-beta-steroid 4-dehydrogenase OS=Rattus norvegicus GN=Akr1d1 PE=2 SV=1 - [F1LML3_RAT]	37.107	6.99072	39.81	14	2	catalytic activity	cytoplasm; cytosol	metabolic process	Pf00248	0.461643	0.415683	0.353053	0.900443	0.618744	0.764774	0.0471357
P32551	Cytochrome b-c1 complex subunit 2, mitochondrial OS=Rattus norvegicus GN=Uqcrc2 PE=1 SV=2 - [QCR2_RAT]	48.3662	9.14404	39.82	14	1	catalytic activity; metal ion binding; protein binding	cytoplasm; mitochondrion; membrane	metabolic process; transport	Pf00675; Pf05193	0.509587	0.478833	0.44802	0.939649	0.836067	0.879183	0.379979
D4AB01	Histidine triad nucleotide binding protein 2 (Predicted), isoform CRA_a OS=Rattus norvegicus GN=Hint2 PE=4 SV=1 - [D4AB01_RAT]	17.3693	9.42236	39.88	4	1	catalytic activity	cytoplasm; mitochondrion	metabolic process	Pf01230; Pf11969	0.866623	1.16516	1.02819	1.34448	0.0529881	1.18644	0.0848336
E3NZ06	10-formyltetrahydrofolate dehydrogenase OS=Danio rerio GN=aldh1l1 PE=2 SV=1 - [E3NZ06_DANRE]	100.091	6.30322	39.98	18	4	catalytic activity	cytoplasm	metabolic process	Pf00171; Pf00550; Pf00551; Pf02911	1.10934	1.04473	1.21846	0.941756	0.848019	1.09836	0.307437
D4A4D5	Protein LOC498555 OS=Rattus norvegicus GN=LOC498555 PE=4 SV=1 - [D4A4D5_RAT]	11.6989	4.53857	40	4	3	structural molecule activity	cytoplasm; ribosome	metabolic process	Pf00428	0.615903	0.628795	0.567339	1.02093	0.75614	0.92115	0.611713
P02696	Retinol-binding protein 1 OS=Rattus norvegicus GN=Rbp1 PE=1 SV=2 - [RET1_RAT]	15.8238	5.24951	40	4	5	transporter activity	cytoplasm; cytosol	metabolic process; transport; cell differentiation; development; regulation of biological process; response to stimulus	Pf00061	0.977229	0.937817	0.930389	0.959669	0.94967	0.952068	0.806109
P08011	Microsomal glutathione S-transferase 1 OS=Rattus norvegicus GN=Mgst1 PE=1 SV=3 - [MGST1_RAT]	17.4602	9.61279	40	4	1	catalytic activity; antioxidant activity; protein binding	nucleus; cytoplasm; mitochondrion; membrane; endoplasmic reticulum	metabolic process; response to stimulus; cell differentiation; development; reproduction; cell organization and biogenesis	Pf01124	0.466485	0.516196	0.423876	1.10656	0.431964	0.908659	0.537859
P11232	Thioredoxin OS=Rattus norvegicus GN=Txn PE=1 SV=2 - [THIO_RAT]	11.6657	4.91943	40	5	1	antioxidant activity; catalytic activity; protein binding	extracellular; nucleus; cytoplasm; mitochondrion; cytosol	metabolic process; regulation of biological process; transport; response to stimulus; cellular homeostasis	Pf00085	0.634725	0.525108	0.61311	0.827299	0.282147	0.965945	0.896143
Q6DGG1	Alpha/beta hydrolase domain-containing protein 14B OS=Rattus norvegicus GN=Abhd14b PE=2 SV=1 - [ABHEB_RAT]	22.6037	6.01123	40	7	3	catalytic activity	nucleus; organelle lumen; cytoplasm		Pf00561; Pf12146; Pf12695; Pf12697	0.454388	0.398751	0.365303	0.877557	0.500799	0.803946	0.112198
F1QZ40	Uncharacterized protein (Fragment) OS=Danio rerio GN=ftcd PE=2 SV=1 - [F1QZ40_DANRE]	60.3249	6.97607	40	18	2	catalytic activity	cytoplasm; Golgi; membrane	metabolic process	Pf02971; Pf04961; Pf07837	1.12638	1.02425	1.15032	0.909328	0.666721	1.02125	0.720723
F1LM82	Heterogeneous nuclear ribonucleoproteins A2/B1 (Fragment) OS=Rattus norvegicus GN=Hnrnpa2b1 PE=2 SV=1 - [F1LM82_RAT]	33.7583	9.14404	40.06	9	10	nucleotide binding			Pf00076	0.431678	0.382362	0.43288	0.885758	0.542003	1.00278	0.848337
Q9PV90	60S acidic ribosomal protein P0 OS=Danio rerio GN=rplp0 PE=2 SV=1 - [RLA0_DANRE]	34.7312	6.56592	40.13	4	2	structural molecule activity	cytoplasm; ribosome	metabolic process; development	Pf00428; Pf00466	0.936859	1.02719	1.05491	1.09642	0.464481	1.12601	0.212363
Q4V8I9	UDP-glucose pyrophosphorylase 2 OS=Rattus norvegicus GN=Ugp2 PE=2 SV=1 - [Q4V8I9_RAT]	56.9878	7.60596	40.16	11	5	catalytic activity; nucleotide binding	cytoplasm	metabolic process	Pf01704	0.623796	0.547665	0.6641	0.877956	0.502769	1.06461	0.461559
P29314	40S ribosomal protein S9 OS=Rattus norvegicus GN=Rps9 PE=1 SV=4 - [RS9_RAT]	22.5776	10.6528	40.21	4	6	RNA binding; structural molecule activity	cytoplasm; ribosome; cytosol	metabolic process	Pf00163; Pf01479	1.77301	1.62502	1.73215	0.916532	0.706301	0.976955	0.967673
Q803F6	40S ribosomal protein SA OS=Danio rerio GN=rpsa PE=2 SV=1 - [RSSA_DANRE]	33.9909	4.84326	40.26	5	4	structural molecule activity	nucleus; cytoplasm; ribosome; membrane; cytosol	cell organization and biogenesis; metabolic process; transport	Pf00318	1.14907	1.17419	1.1712	1.02186	0.752079	1.01926	0.734103
B8JLC8	Uncharacterized protein OS=Danio rerio GN=si:ch73-131e21.5 PE=4 SV=1 - [B8JLC8_DANRE]	22.3003	6.56592	40.3	2	62	nucleotide binding	nucleus; cytoplasm	cell communication; regulation of biological process; response to stimulus; transport	Pf00025; Pf00071; Pf04670; Pf08477; Pf09439	1.19256	1.3132	1.25054	1.10115	0.449101	1.04861	0.5496
F2W7E1	Rho2 GTPase OS=Dugesia japonica PE=2 SV=1 - [F2W7E1_DUGJA]	21.7733	6.3667	40.31	2	7	nucleotide binding; catalytic activity	membrane	cell communication; regulation of biological process; response to stimulus	Pf00009; Pf00025; Pf00071; Pf08477	1.81993	1.69862	1.92221	0.933346	0.800397	1.0562	0.506673
P62198	26S protease regulatory subunit 8 OS=Rattus norvegicus GN=Psmc5 PE=1 SV=1 - [PRS8_RAT]	45.5971	7.54736	40.39	13	2	nucleotide binding; catalytic activity; protein binding	proteasome; nucleus; organelle lumen; cytoplasm	metabolic process; response to stimulus; reproduction; regulation of biological process	Pf00004; Pf01057; Pf01078; Pf05496; Pf06068; Pf06414; Pf07724; Pf07726; Pf07728	1.41313	1.33539	1.50622	0.944993	0.866391	1.06588	0.455005
B3DFP9	Uncharacterized protein OS=Danio rerio GN=apoa2 PE=2 SV=1 - [B3DFP9_DANRE]	15.5274	7.18115	40.43	6	1			cell organization and biogenesis; development		0.968896	1.00511	0.889237	1.03738	0.68558	0.917783	0.59147
Q6P3J5	Eukaryotic translation elongation factor 2 OS=Danio rerio GN=eef2b PE=2 SV=1 - [Q6P3J5_DANRE]	95.4368	6.69775	40.44	12	7	nucleotide binding; RNA binding; catalytic activity		metabolic process; development; response to stimulus	Pf00009; Pf00679; Pf03144; Pf03764	1.04527	1.15596	0.961241	1.1059	0.434046	0.919612	0.602439
P11711	Cytochrome P450 2A1 OS=Rattus norvegicus GN=Cyp2a1 PE=1 SV=2 - [CP2A1_RAT]	55.9591	9.0415	40.65	8	1	catalytic activity; metal ion binding	cytoplasm; endoplasmic reticulum; membrane	metabolic process	Pf00067	1.29132	0.828228	0.965343	0.641383	0.00492787	0.747566	0.0303253
Q1JPZ8	Serine/threonine-protein phosphatase OS=Danio rerio GN=ppp1cb PE=2 SV=1 - [Q1JPZ8_DANRE]	37.1176	6.18896	40.67	2	8	catalytic activity		development	Pf00149	1.82666	1.64403	1.95538	0.900018	0.616474	1.07047	0.431715
P49889	Estrogen sulfotransferase, isoform 3 OS=Rattus norvegicus GN=Ste PE=1 SV=1 - [ST1E3_RAT]	35.3925	5.78271	40.68	4	1	catalytic activity	nucleus; cytoplasm; membrane	reproduction; metabolic process	Pf00685	0.388543	0.526299	0.315519	1.35455	0.0478125	0.812057	0.131382
P13221	Aspartate aminotransferase, cytoplasmic OS=Rattus norvegicus GN=Got1 PE=1 SV=3 - [AATC_RAT]	46.3995	7.21045	40.68	12	1	catalytic activity	cytoplasm; vacuole; cytosol	metabolic process; response to stimulus	Pf00155	0.697545	0.681481	0.714195	0.97697	0.959467	1.02387	0.703357
P55053	Fatty acid-binding protein, epidermal OS=Rattus norvegicus GN=Fabp5 PE=1 SV=3 - [FABP5_RAT]	15.0495	7.18115	40.74	5	2	transporter activity	cytoplasm	metabolic process; transport; response to stimulus	Pf00061	0.525664	0.567443	0.480416	1.07948	0.522434	0.913923	0.568553
Q499Q4	Phosphoglucomutase 1 OS=Rattus norvegicus GN=Pgm1 PE=2 SV=2 - [Q499Q4_RAT]	61.3516	6.56592	40.75	17	5	metal ion binding; catalytic activity	cytoplasm; cytosol; cytoskeleton	metabolic process; cellular homeostasis; response to stimulus	Pf00408; Pf02878; Pf02879; Pf02880	0.405968	0.392597	0.362067	0.967065	0.991419	0.891862	0.444732
P04182	Ornithine aminotransferase, mitochondrial OS=Rattus norvegicus GN=Oat PE=1 SV=1 - [OAT_RAT]	48.302	6.99072	40.77	14	1	catalytic activity	cytoplasm; mitochondrion; organelle lumen	metabolic process	Pf00202	0.4051	0.309451	0.340857	0.763888	0.105352	0.841414	0.219956
P97852	Peroxisomal multifunctional enzyme type 2 OS=Rattus norvegicus GN=Hsd17b4 PE=1 SV=3 - [DHB4_RAT]	79.378	8.57275	40.82	23	2	nucleotide binding; catalytic activity; protein binding	cytoplasm; mitochondrion; membrane	metabolic process; cell differentiation; development; reproduction	Pf00106; Pf01575; Pf02036; Pf08659	0.577292	0.603294	0.496776	1.04504	0.653948	0.860528	0.294521
Q7ZUS9	Electron-transfer-flavoprotein, alpha polypeptide OS=Danio rerio GN=etfa PE=2 SV=1 - [Q7ZUS9_DANRE]	35.0686	7.35693	40.84	9	2				Pf00766; Pf01012	1.24855	1.19769	1.22154	0.959262	0.947361	0.978366	0.976811
Q5PPL3	Sterol-4-alpha-carboxylate 3-dehydrogenase, decarboxylating OS=Rattus norvegicus GN=Nsdhl PE=2 SV=1 - [NSDHL_RAT]	40.386	8.85107	40.88	11	1	nucleotide binding; catalytic activity	cytoplasm; endoplasmic reticulum; membrane	development; metabolic process; cell communication; regulation of biological process; response to stimulus	Pf01073; Pf01370; Pf02719; Pf04321; Pf05368; Pf07993	0.438098	0.415291	0.335537	0.94794	0.883131	0.765895	0.0484443
D4A5L9	Protein LOC679794 OS=Rattus norvegicus GN=LOC679794 PE=4 SV=1 - [D4A5L9_RAT]	11.628	9.5835	40.95	4	4	metal ion binding	cytoplasm; mitochondrion; membrane	transport; metabolic process	Pf00034	0.468403	0.381026	0.402127	0.813458	0.233814	0.858508	0.286007
F1LNW3	Acyl-coenzyme A oxidase OS=Rattus norvegicus GN=Acox2 PE=2 SV=1 - [F1LNW3_RAT]	76.6979	7.7085	40.97	2	1	catalytic activity; protein binding	cytoplasm	metabolic process	Pf01756	0.993983	1.00033	0.995916	1.00638	0.821311	1.00195	0.854321
F8W3N3	Uncharacterized protein OS=Danio rerio GN=fabp7a PE=2 SV=1 - [F8W3N3_DANRE]	13.4778	5.56689	41.18	3	5	transporter activity		transport	Pf00061	0.964074	0.993302	1.02959	1.03032	0.715446	1.06796	0.444337
D3ZCZ9	Protein LOC679739 OS=Rattus norvegicus GN=LOC679739 PE=4 SV=1 - [D3ZCZ9_RAT]	13.0317	9.21729	41.38	3	3				Pf10276	0.614781	0.68189	0.571798	1.10916	0.42391	0.930084	0.666485
Q6PHI7	Phenylalanine hydroxylase OS=Danio rerio GN=pah PE=2 SV=1 - [Q6PHI7_DANRE]	51.3218	5.85889	41.43	12	11	catalytic activity; metal ion binding		metabolic process; response to stimulus	Pf00351; Pf01842	1.05309	1.01133	0.971842	0.960342	0.953476	0.922845	0.621995
P04903	Glutathione S-transferase alpha-2 OS=Rattus norvegicus GN=Gsta2 PE=2 SV=2 - [GSTA2_RAT]	25.5425	8.80713	41.44	3	3	catalytic activity; protein binding	nucleus; membrane; cytoplasm; cytosol	metabolic process; response to stimulus	Pf00043; Pf02798	0.910977	0.849298	0.852983	0.932293	0.794453	0.936339	0.705615
P00502	Glutathione S-transferase alpha-1 OS=Rattus norvegicus GN=Gsta1 PE=1 SV=3 - [GSTA1_RAT]	25.5906	8.79248	41.44	3	4	catalytic activity; protein binding	nucleus; membrane; cytoplasm; cytosol	metabolic process; response to stimulus	Pf00043; Pf02798	0.493115	0.389247	0.451097	0.789362	0.162808	0.914791	0.573677
D2Z0D8	DjPiwiA OS=Dugesia japonica GN=DjpiwiA PE=2 SV=1 - [D2Z0D8_DUGJA]	92.8238	9.46631	41.53	30	2	protein binding			Pf02170; Pf02171	2.02306	1.82919	2.28979	0.904172	0.638756	1.13185	0.195605
Q4QRB4	Tubulin beta-3 chain OS=Rattus norvegicus GN=Tubb3 PE=1 SV=1 - [TBB3_RAT]	50.3862	4.93213	41.56	2	2	nucleotide binding; catalytic activity; structural molecule activity	cytoplasm; cytoskeleton; membrane	metabolic process; cellular component movement; cell organization and biogenesis; cell differentiation; development; response to stimulus	Pf00091; Pf03953; Pf10644	1.91682	1.67963	1.97979	0.876258	0.494391	1.03285	0.645251
Q66HF3	Electron transfer flavoprotein-ubiquinone oxidoreductase, mitochondrial OS=Rattus norvegicus GN=Etfdh PE=2 SV=1 - [Q66HF3_RAT]	68.1207	7.56201	41.56	18	2	catalytic activity; metal ion binding	cytoplasm; mitochondrion; membrane	response to stimulus; metabolic process	Pf00890; Pf01266; Pf01494; Pf01946; Pf03486; Pf05187; Pf05834; Pf07992; Pf12831	0.661466	0.61984	0.606461	0.93707	0.821456	0.916844	0.585864
Q6AYS8	Estradiol 17-beta-dehydrogenase 11 OS=Rattus norvegicus GN=Hsd17b11 PE=2 SV=1 - [DHB11_RAT]	32.9166	8.63135	41.61	8	1	nucleotide binding; catalytic activity	extracellular; cytoplasm	metabolic process	Pf00106; Pf08659	1.32925	1.26911	1.26118	0.954751	0.921799	0.94879	0.784978
Q5BKV9	Rpl9 protein OS=Danio rerio GN=rpl9 PE=2 SV=1 - [Q5BKV9_DANRE]	21.6407	9.94971	41.67	3	5	structural molecule activity; RNA binding	cytoplasm; ribosome	metabolic process	Pf00347	0.717746	0.889243	0.736293	1.23894	0.146334	1.02584	0.690395
A4V6M7	WM6 protein OS=Dugesia japonica PE=2 SV=1 - [A4V6M7_DUGJA]	46.4151	8.00146	41.69	10	1	catalytic activity; nucleotide binding			Pf00270; Pf00271	1.92367	1.81856	1.96434	0.945364	0.868502	1.02115	0.721437
P17764	Acetyl-CoA acetyltransferase, mitochondrial OS=Rattus norvegicus GN=Acat1 PE=1 SV=1 - [THIL_RAT]	44.6664	8.76318	41.75	11	1	catalytic activity; protein binding; metal ion binding	cytoplasm; mitochondrion; membrane; organelle lumen	development; metabolic process; response to stimulus; cell organization and biogenesis	Pf00108; Pf00109; Pf02803	0.722162	0.595403	0.725148	0.824474	0.271837	1.00413	0.838751
Q9DGM3	Chaperonin 10 (Fragment) OS=Danio rerio GN=hspe1 PE=2 SV=1 - [Q9DGM3_DANRE]	9.85833	8.104	41.76	2	4		cytoplasm	metabolic process; response to stimulus	Pf00166	0.854318	0.800461	0.810537	0.936959	0.820826	0.948754	0.78474
G3V7L6	26S protease regulatory subunit 7 OS=Rattus norvegicus GN=Psmc2 PE=3 SV=1 - [G3V7L6_RAT]	48.6031	5.94775	41.8	14	3	nucleotide binding; protein binding; catalytic activity	proteasome; nucleus; organelle lumen; cytoplasm; mitochondrion	metabolic process; regulation of biological process	Pf00004; Pf00158; Pf07724; Pf07726; Pf07728	1.17324	1.20245	1.25009	1.0249	0.738819	1.0655	0.456944
F1RBS6	Uncharacterized protein OS=Danio rerio GN=nme2b.2 PE=2 SV=1 - [F1RBS6_DANRE]	17.2508	7.95752	41.83	2	9	nucleotide binding; catalytic activity; metal ion binding	cytoplasm	metabolic process	Pf00334	1.01643	0.887599	1.01441	0.873255	0.47972	0.998017	0.882485
P51635	Alcohol dehydrogenase [NADP(+)] OS=Rattus norvegicus GN=Akr1a1 PE=1 SV=2 - [AK1A1_RAT]	36.4829	7.31299	41.85	11	1	catalytic activity	cytoplasm; cytosol; membrane	metabolic process	Pf00248	0.72676	0.712986	0.655888	0.981047	0.939896	0.902481	0.502712
F1R9W9	Delta-1-pyrroline-5-carboxylate dehydrogenase, mitochondrial OS=Danio rerio GN=aldh4a1 PE=2 SV=1 - [F1R9W9_DANRE]	61.4683	7.51807	41.91	19	2	catalytic activity	cytoplasm; mitochondrion; organelle lumen	metabolic process	Pf00171	0.946909	1.00033	0.907827	1.05642	0.608527	0.958726	0.849227
Q6PHI8	Tkt protein OS=Danio rerio GN=tkt PE=2 SV=1 - [Q6PHI8_DANRE]	67.7953	7.2251	41.92	19	2	catalytic activity		metabolic process	Pf00456; Pf00676; Pf02779; Pf02780; Pf09364	1.2127	1.14225	1.13476	0.941914	0.848915	0.93573	0.701783
Q6PBY1	40S ribosomal protein S3a OS=Danio rerio GN=rps3a PE=2 SV=3 - [RS3A_DANRE]	30.1799	9.72998	41.95	3	1	structural molecule activity	cytoplasm; ribosome	metabolic process; development	Pf01015	1.40874	1.51074	1.32641	1.0724	0.547978	0.941554	0.738651
P10888	Cytochrome c oxidase subunit 4 isoform 1, mitochondrial OS=Rattus norvegicus GN=Cox4i1 PE=1 SV=1 - [COX41_RAT]	19.5021	9.43701	42.01	7	1	catalytic activity; transporter activity	nucleus; cytoplasm; mitochondrion; membrane	response to stimulus	Pf02936	0.499628	0.430514	0.456448	0.861669	0.424953	0.913575	0.566507
Q5U3Z7	Serine hydroxymethyltransferase OS=Rattus norvegicus GN=Shmt2 PE=2 SV=1 - [Q5U3Z7_RAT]	55.7296	8.20654	42.06	12	1	catalytic activity; protein binding	cytoplasm; mitochondrion; membrane; organelle lumen; cytoskeleton	metabolic process; cell proliferation; regulation of biological process; cell organization and biogenesis	Pf00155; Pf00464	0.956843	0.851677	0.915404	0.89009	0.56427	0.956691	0.836024
L0MXG7	DJ-1 OS=Dugesia japonica GN=DJ-1 PE=2 SV=1 - [L0MXG7_DUGJA]	19.3793	7.28369	42.16	7	1				Protein not found	1.77162	1.74644	1.84116	0.98579	0.917283	1.03925	0.605403
F1M953	Stress-70 protein, mitochondrial OS=Rattus norvegicus GN=Hspa9 PE=2 SV=1 - [F1M953_RAT]	73.6988	6.16357	42.27	10	2	nucleotide binding; protein binding	cytoplasm; mitochondrion; cell surface; organelle lumen	cell organization and biogenesis; metabolic process; transport	Pf00012; Pf06723	0.749186	0.845856	0.741907	1.12903	0.365756	0.990284	0.938658
B8JI00	Uncharacterized protein OS=Danio rerio GN=suclg1 PE=2 SV=1 - [B8JI00_DANRE]	34.1518	9.14404	42.28	6	3	nucleotide binding; catalytic activity		metabolic process	Pf00549; Pf02629	1.08343	1.07282	1.03379	0.990203	0.896397	0.95418	0.81976
P62982	Ubiquitin-40S ribosomal protein S27a OS=Rattus norvegicus GN=Rps27a PE=1 SV=2 - [RS27A_RAT]	17.9395	9.64209	42.31	4	33	structural molecule activity; protein binding; metal ion binding	nucleus; cytoplasm; ribosome; cytosol	metabolic process	Pf00240; Pf01599; Pf11976	1.38482	1.46657	1.345	1.05904	0.598336	0.971251	0.930647
P18418	Calreticulin OS=Rattus norvegicus GN=Calr PE=1 SV=1 - [CALR_RAT]	47.9658	4.48779	42.31	13	5	RNA binding; protein binding; metal ion binding	cytoplasm; extracellular; nucleus; endoplasmic reticulum; organelle lumen; Golgi; cytosol; cell surface; membrane	metabolic process; regulation of biological process; cell organization and biogenesis; transport; reproduction; cell proliferation; response to stimulus; cell communication; cell differentiation; development	Pf00262	0.383875	0.315687	0.315466	0.822369	0.264305	0.821794	0.157357
C0KTP7	90 kDa heat shock protein OS=Dugesia japonica PE=2 SV=1 - [C0KTP7_DUGJA]	82.0976	5.04639	42.38	22	1	nucleotide binding; protein binding	cytoplasm; membrane	metabolic process; response to stimulus	Pf00183; Pf02518	2.0483	1.82485	2.13196	0.890908	0.568513	1.04084	0.595705
P62907	60S ribosomal protein L10a OS=Rattus norvegicus GN=Rpl10a PE=1 SV=2 - [RL10A_RAT]	24.8155	9.93506	42.4	4	7	RNA binding; structural molecule activity	cytoplasm; mitochondrion; ribosome; cytosol	metabolic process	Pf00687	0.508995	0.493519	0.52561	0.969595	0.995125	1.03264	0.646571
F1QF00	Uncharacterized protein OS=Danio rerio GN=pgm1 PE=2 SV=1 - [F1QF00_DANRE]	61.15	6.11279	42.42	15	2	metal ion binding; catalytic activity		metabolic process	Pf00408; Pf02878; Pf02879; Pf02880	0.904648	0.86823	0.929022	0.959744	0.95009	1.02694	0.683192
P56571	ES1 protein homolog, mitochondrial OS=Rattus norvegicus PE=1 SV=2 - [ES1_RAT]	28.1549	8.92432	42.48	8	1		cytoplasm; mitochondrion		Pf01965	0.373294	0.34913	0.296355	0.935268	0.811259	0.793892	0.0913468
Q6DHE8	Ras homolog gene family, member Ad OS=Danio rerio GN=rhoad PE=2 SV=1 - [Q6DHE8_DANRE]	21.9793	6.58057	42.49	3	19	nucleotide binding	membrane	cell communication; regulation of biological process; response to stimulus	Pf00025; Pf00071; Pf08477	1.56648	1.43009	1.7773	0.912929	0.686435	1.13458	0.188121
B3DGZ9	Pyruvate carboxylase OS=Danio rerio GN=pc PE=2 SV=1 - [B3DGZ9_DANRE]	129.917	6.90283	42.51	21	6	nucleotide binding; catalytic activity; metal ion binding	cytoplasm	metabolic process; response to stimulus	Pf00289; Pf00364; Pf00682; Pf01597; Pf02222; Pf02436; Pf02785; Pf02786; Pf07478	1.12754	1.12137	1.16013	0.994528	0.876085	1.0289	0.670484
B0BNJ4	Ethylmalonic encephalopathy 1 OS=Rattus norvegicus GN=Ethe1 PE=2 SV=1 - [B0BNJ4_RAT]	27.659	7.06396	42.52	7	1	catalytic activity	nucleus; organelle lumen; cytoplasm; mitochondrion		Pf00753; Pf12706	0.840963	0.907191	0.80366	1.07875	0.525018	0.955643	0.82923
P05197	Elongation factor 2 OS=Rattus norvegicus GN=Eef2 PE=1 SV=4 - [EF2_RAT]	95.2229	6.82959	42.66	13	2	nucleotide binding; RNA binding; catalytic activity	cytoplasm	metabolic process	Pf00009; Pf00679; Pf03144; Pf03764	0.236059	0.203902	0.18845	0.863775	0.434679	0.798316	0.100134
Q63081	Protein disulfide-isomerase A6 OS=Rattus norvegicus GN=Pdia6 PE=1 SV=2 - [PDIA6_RAT]	48.1433	5.13525	42.73	14	1	catalytic activity; metal ion binding	cytoplasm; endoplasmic reticulum; organelle lumen; membrane	metabolic process; coagulation; response to stimulus; cellular homeostasis; regulation of biological process	Pf00085	0.569059	0.358648	0.455562	0.630247	0.00337677	0.800554	0.104809
Q60587	Trifunctional enzyme subunit beta, mitochondrial OS=Rattus norvegicus GN=Hadhb PE=1 SV=1 - [ECHB_RAT]	51.3815	9.46631	42.74	13	1	catalytic activity; protein binding; nucleotide binding	cytoplasm; mitochondrion; membrane; endoplasmic reticulum; organelle lumen	metabolic process	Pf00108; Pf00109; Pf02803	0.901036	0.85465	0.698996	0.948519	0.886419	0.775769	0.0612453
P97519	Hydroxymethylglutaryl-CoA lyase, mitochondrial OS=Rattus norvegicus GN=Hmgcl PE=2 SV=1 - [HMGCL_RAT]	34.1697	8.41162	42.77	10	3	metal ion binding; catalytic activity; protein binding	cytoplasm; mitochondrion; membrane; organelle lumen	development; metabolic process; cell organization and biogenesis; response to stimulus	Pf00682	0.672326	0.574194	0.887423	0.85404	0.390605	1.31993	0.00704636
P46462	Transitional endoplasmic reticulum ATPase OS=Rattus norvegicus GN=Vcp PE=1 SV=3 - [TERA_RAT]	89.2927	5.26221	42.8	9	6	nucleotide binding; catalytic activity; RNA binding; protein binding	proteasome; nucleus; organelle lumen; cytoplasm; endoplasmic reticulum; cytosol; chromosome	metabolic process; response to stimulus; transport; cell death; regulation of biological process; reproduction; cell organization and biogenesis	Pf00004; Pf00910; Pf01057; Pf01078; Pf02359; Pf02933; Pf05496; Pf05673; Pf06068; Pf07724; Pf07728; Pf09336; Pf09848	0.591602	0.771114	0.615599	1.30343	0.0797633	1.04056	0.597403
P14408	Fumarate hydratase, mitochondrial OS=Rattus norvegicus GN=Fh PE=1 SV=1 - [FUMH_RAT]	54.429	8.95361	42.8	13	2	catalytic activity	cytoplasm; mitochondrion	metabolic process	Pf00206; Pf10415	0.546622	0.44835	0.505486	0.820219	0.256739	0.924745	0.633576
D4ACB8	Chaperonin subunit 8 (Theta) (Predicted), isoform CRA_a OS=Rattus norvegicus GN=Cct8 PE=3 SV=1 - [D4ACB8_RAT]	59.5505	5.5415	42.88	15	1	nucleotide binding; protein binding	cytoplasm; cytoskeleton; cytosol	metabolic process	Pf00118	0.458048	0.39948	0.409373	0.872137	0.474304	0.893733	0.454711
Q5HZY2	GTP-binding protein SAR1b OS=Rattus norvegicus GN=Sar1b PE=2 SV=1 - [SAR1B_RAT]	22.3955	6.11279	42.93	4	4	nucleotide binding; signal transducer activity; metal ion binding	cytoplasm; endoplasmic reticulum; membrane; Golgi	transport; cell communication; regulation of biological process; response to stimulus	Pf00025; Pf00503; Pf01926; Pf08477; Pf09439	0.632248	0.701133	0.620277	1.10895	0.424547	0.981067	0.994275
P20673	Argininosuccinate lyase OS=Rattus norvegicus GN=Asl PE=2 SV=1 - [ARLY_RAT]	51.5173	6.40479	42.95	17	2	catalytic activity	nucleus; cytoplasm; membrane; mitochondrion; endoplasmic reticulum	metabolic process; response to stimulus; development; defense response	Pf00206	0.918501	0.723442	0.629843	0.787633	0.158348	0.68573	0.00435174
Q3B8N9	Biphenyl hydrolase-like (Serine hydrolase) OS=Rattus norvegicus GN=Bphl PE=2 SV=1 - [Q3B8N9_RAT]	32.8021	8.79248	42.96	11	1	catalytic activity	cytoplasm; mitochondrion		Pf00561; Pf01738; Pf03959; Pf12695; Pf12697	0.612455	0.542812	0.578362	0.886289	0.544714	0.944333	0.756379
P62703	40S ribosomal protein S4, X isoform OS=Rattus norvegicus GN=Rps4x PE=2 SV=2 - [RS4X_RAT]	29.5791	10.1548	42.97	10	3	RNA binding; structural molecule activity	cytoplasm; ribosome; cytosol	metabolic process; development; cell proliferation; regulation of biological process	Pf00900; Pf08071	0.646876	0.668897	0.630502	1.03404	0.699613	0.974687	0.952965
Q6NWI0	Tubulin, alpha 8 like OS=Danio rerio GN=tuba8l PE=2 SV=1 - [Q6NWI0_DANRE]	50.0185	5.14795	42.98	3	1	nucleotide binding; catalytic activity; structural molecule activity	cytoplasm; cytoskeleton	metabolic process; cellular component movement; cell organization and biogenesis	Pf00091; Pf03953	0.925636	1.02999	0.927761	1.11273	0.412989	1.0023	0.851822
P46953	3-hydroxyanthranilate 3,4-dioxygenase OS=Rattus norvegicus GN=Haao PE=1 SV=2 - [3HAO_RAT]	32.5613	5.8335	43.01	10	1	catalytic activity; metal ion binding	cytoplasm; cytosol; membrane; mitochondrion	metabolic process; response to stimulus; cellular homeostasis	Pf06052; Pf07883	0.516521	0.579275	0.623308	1.12149	0.387083	1.20674	0.0603949
P09811	Glycogen phosphorylase, liver form OS=Rattus norvegicus GN=Pygl PE=1 SV=5 - [PYGL_RAT]	97.421	7.1958	43.06	17	2	nucleotide binding; catalytic activity; protein binding	cytoplasm; membrane	metabolic process	Pf00343	0.681557	0.581803	0.696659	0.853639	0.388838	1.02216	0.714686
D3ZMF5	Very long-chain-specific acyl-CoA dehydrogenase, mitochondrial OS=Rattus norvegicus GN=Acadvl PE=2 SV=1 - [D3ZMF5_RAT]	68.9077	8.98291	43.08	22	3	catalytic activity		metabolic process	Pf00441; Pf02770; Pf02771; Pf08028	0.530055	0.421921	0.468813	0.795995	0.180696	0.884461	0.406308
Q6PBI6	6-pyruvoyl-tetrahydropterin synthase/dimerization cofactor of hepatocyte nuclear factor 1 alpha (TCF1) OS=Danio rerio GN=pcbd1 PE=3 SV=1 - [Q6PBI6_DANRE]	11.8138	6.13818	43.14	4	2	catalytic activity		metabolic process	Pf01329	1.05375	0.979627	1.09449	0.929661	0.779616	1.03866	0.609
Q6NYR4	Heat shock cognate 71 kDa protein OS=Danio rerio GN=hspa8 PE=2 SV=1 - [Q6NYR4_DANRE]	71.1362	5.46533	43.45	6	8	nucleotide binding		cell organization and biogenesis; response to stimulus; development	Pf00012; Pf06723	1.35318	1.22662	1.21009	0.906472	0.65119	0.894252	0.457498
G3V6T7	Protein disulfide isomerase associated 4 OS=Rattus norvegicus GN=Pdia4 PE=3 SV=1 - [G3V6T7_RAT]	72.7027	5.14795	43.55	24	2	catalytic activity; metal ion binding; protein binding	cytoplasm; endoplasmic reticulum; organelle lumen; cell surface	metabolic process; cellular homeostasis; regulation of biological process	Pf00085; Pf01216	0.656926	0.579958	0.556523	0.882836	0.527173	0.847161	0.240964
Q6DGJ6	Peroxiredoxin 2 OS=Danio rerio GN=prdx2 PE=2 SV=1 - [Q6DGJ6_DANRE]	21.8372	6.34131	43.65	6	1	antioxidant activity; catalytic activity		metabolic process	Pf00578; Pf08534; Pf10417	1.07424	0.875377	0.964293	0.81488	0.238527	0.897651	0.475939
P15650	Long-chain specific acyl-CoA dehydrogenase, mitochondrial OS=Rattus norvegicus GN=Acadl PE=1 SV=1 - [ACADL_RAT]	47.8424	7.73779	43.72	15	1	catalytic activity	cytoplasm; mitochondrion; organelle lumen; membrane	metabolic process; regulation of biological process; cell organization and biogenesis	Pf00441; Pf02770; Pf02771; Pf08028	0.524982	0.49692	0.513986	0.946548	0.875223	0.979054	0.981265
Q6AYQ8	Acylpyruvase FAHD1, mitochondrial OS=Rattus norvegicus GN=Fahd1 PE=2 SV=1 - [FAHD1_RAT]	24.4646	7.73779	43.89	7	2	catalytic activity; metal ion binding	cytoplasm; mitochondrion; membrane; cytosol	metabolic process	Pf01557	1.3377	1.31124	1.2685	0.98022	0.943858	0.948272	0.781641
Q7T1D9	Echs1 protein (Fragment) OS=Danio rerio GN=echs1 PE=2 SV=1 - [Q7T1D9_DANRE]	31.0151	8.55811	43.94	5	2	catalytic activity		metabolic process	Pf00378	0.990156	0.951822	0.997434	0.961285	0.958808	1.00735	0.816054
P70473	Alpha-methylacyl-CoA racemase OS=Rattus norvegicus GN=Amacr PE=1 SV=3 - [AMACR_RAT]	41.8015	6.84424	43.98	14	4	catalytic activity; protein binding	cytoplasm; mitochondrion	metabolic process	Pf02515	0.462369	0.452135	0.333842	0.977866	0.955154	0.722025	0.014611
Q6PTJ4	ATP synthase subunit beta (Fragment) OS=Stylochus sp. KJP-2004 PE=2 SV=1 - [Q6PTJ4_9TURB]	46.106	5.12256	44.03	2	1	nucleotide binding; catalytic activity; transporter activity	membrane	metabolic process; transport	Pf00006; Pf00306; Pf02874	2.1077	2.20502	2.3972	1.04617	0.649354	1.13735	0.180771
P10867	L-gulonolactone oxidase OS=Rattus norvegicus GN=Gulo PE=1 SV=3 - [GGLO_RAT]	50.5823	7.25439	44.09	18	4	catalytic activity	cytoplasm; endoplasmic reticulum; membrane	metabolic process	Pf01565; Pf04030	0.749175	0.702031	0.680474	0.937072	0.821466	0.908298	0.535779
P15149	Cytochrome P450 2A2 OS=Rattus norvegicus GN=Cyp2a2 PE=1 SV=1 - [CP2A2_RAT]	56.3092	7.89893	44.11	10	1	catalytic activity; metal ion binding	cytoplasm; endoplasmic reticulum; membrane	metabolic process	Pf00067	0.465182	0.51312	0.471034	1.10305	0.443036	1.01258	0.779636
Q9QXQ0	Alpha-actinin-4 OS=Rattus norvegicus GN=Actn4 PE=1 SV=2 - [ACTN4_RAT]	104.849	5.43994	44.13	17	3	protein binding; metal ion binding	cytoskeleton; nucleus; cytoplasm; cytosol	response to stimulus; transport; cell death; regulation of biological process; cell organization and biogenesis; cellular component movement	Pf00307; Pf00435; Pf08726; Pf11971	0.782514	0.850026	0.801279	1.08628	0.498634	1.02398	0.702615
P07872	Peroxisomal acyl-coenzyme A oxidase 1 OS=Rattus norvegicus GN=Acox1 PE=1 SV=1 - [ACOX1_RAT]	74.6313	8.47021	44.18	20	3	catalytic activity; protein binding	cytoplasm; mitochondrion; membrane	metabolic process; reproduction	Pf01756	0.43805	0.419526	0.354671	0.957713	0.938593	0.809659	0.125484
Q6P7A7	Ribophorin I OS=Rattus norvegicus GN=Rpn1 PE=2 SV=1 - [Q6P7A7_RAT]	68.3586	6.50732	44.22	23	2	catalytic activity	cytoplasm; endoplasmic reticulum; membrane	metabolic process; transport	Pf04597	0.636252	0.613917	0.563653	0.964896	0.979201	0.885896	0.413626
F1QYK9	Uncharacterized protein OS=Danio rerio GN=myl9a PE=4 SV=1 - [F1QYK9_DANRE]	19.9825	4.91943	44.25	2	9	metal ion binding			Pf00036	1.35009	1.4391	1.2202	1.06593	0.572024	0.903793	0.510089
B3DHC5	Uncharacterized protein OS=Danio rerio GN=zgc:194131 PE=2 SV=1 - [B3DHC5_DANRE]	29.366	4.83057	44.31	2	3		extracellular	transport; metabolic process	Pf01442; Pf10498	0.890643	0.787028	0.890796	0.883662	0.53135	1.00017	0.867
P04466	Myosin regulatory light chain 2, skeletal muscle isoform OS=Rattus norvegicus GN=Mylpf PE=2 SV=2 - [MLRS_RAT]	18.9574	4.91943	44.38	7	1	metal ion binding; structural molecule activity	cytoskeleton	response to stimulus; development		0.38755	0.722126	0.667666	1.86331	0.000113032	1.72279	3.03521e-07
B0K020	CDGSH iron-sulfur domain-containing protein 1 OS=Rattus norvegicus GN=Cisd1 PE=3 SV=1 - [CISD1_RAT]	12.0891	8.83643	44.44	3	1	metal ion binding	cytoplasm; mitochondrion; membrane	metabolic process; regulation of biological process	Pf09360	0.495705	0.398846	0.454636	0.804603	0.205781	0.917151	0.587694
O88767	Protein DJ-1 OS=Rattus norvegicus GN=Park7 PE=1 SV=1 - [PARK7_RAT]	19.9614	6.771	44.44	6	2	RNA binding; antioxidant activity; catalytic activity; protein binding	nucleus; cytoplasm; mitochondrion; cytosol	cell communication; metabolic process; response to stimulus; defense response; cell organization and biogenesis; reproduction; cell death; regulation of biological process; transport; cellular homeostasis	Pf01965	0.582542	0.600944	0.523424	1.03159	0.710019	0.898518	0.480695
P24470	Cytochrome P450 2C23 OS=Rattus norvegicus GN=Cyp2c23 PE=2 SV=2 - [CP2CN_RAT]	56.3966	8.42627	44.53	18	2	catalytic activity; metal ion binding	cytoplasm; endoplasmic reticulum; membrane	metabolic process; response to stimulus	Pf00067	0.412312	0.393793	0.337402	0.955086	0.923698	0.818317	0.147705
A4V6L0	Sam68-like mammalian protein 1 (Fragment) OS=Dugesia japonica PE=2 SV=1 - [A4V6L0_DUGJA]	27.4003	8.93896	44.58	8	1	RNA binding			Pf00013	1.8871	1.71371	2.00553	0.908118	0.660129	1.06276	0.471262
Q92051	Carbonic anhydrase OS=Danio rerio GN=cahz PE=1 SV=2 - [CAHZ_DANRE]	28.6595	7.59131	44.62	8	1	catalytic activity; metal ion binding		metabolic process; transport; response to stimulus	Pf00194	0.858744	0.794649	0.887163	0.925362	0.755473	1.03309	0.643713
Q6GQN6	Acetyl-Coenzyme A acyltransferase 1 OS=Danio rerio GN=acaa1 PE=2 SV=1 - [Q6GQN6_DANRE]	43.9757	8.5874	44.74	9	1	catalytic activity		metabolic process	Pf00108; Pf02803; Pf08541	0.896744	0.920918	0.991062	1.02696	0.729884	1.10518	0.281494
P82995	Heat shock protein HSP 90-alpha OS=Rattus norvegicus GN=Hsp90aa1 PE=1 SV=3 - [HS90A_RAT]	84.7618	5.0083	44.75	16	9	nucleotide binding; RNA binding; protein binding; catalytic activity; enzyme regulator activity	cytoplasm; cytosol; cell surface; membrane	cell differentiation; cellular component movement; development; metabolic process; response to stimulus; cell organization and biogenesis; regulation of biological process; cell death; transport	Pf00183; Pf02518	0.813315	0.737071	0.719885	0.906254	0.650009	0.885125	0.409684
G3V6H0	Protein LOC100363782 OS=Rattus norvegicus GN=Rab1b PE=3 SV=1 - [G3V6H0_RAT]	22.1632	5.73193	44.78	2	63	nucleotide binding	nucleus; cytoplasm; mitochondrion; Golgi; membrane	cell communication; regulation of biological process; response to stimulus; transport	Pf00025; Pf00071; Pf04670; Pf08477; Pf09439	0.662846	0.534671	0.70685	0.806629	0.211995	1.06639	0.452378
P12938	Cytochrome P450 2D3 OS=Rattus norvegicus GN=Cyp2d3 PE=2 SV=2 - [CP2D3_RAT]	56.6051	6.84424	44.8	8	2	catalytic activity; metal ion binding	cytoplasm; endoplasmic reticulum; membrane	development; metabolic process	Pf00067	0.504989	0.390053	0.455967	0.772399	0.12262	0.902925	0.505202
P08683	Cytochrome P450 2C11 OS=Rattus norvegicus GN=Cyp2c11 PE=1 SV=1 - [CP2CB_RAT]	57.1444	7.69385	44.8	16	1	catalytic activity; metal ion binding	cytoplasm; endoplasmic reticulum; membrane	metabolic process; response to stimulus; development	Pf00067	0.586296	0.531258	0.591112	0.906126	0.649314	1.00822	0.80999
P62083	40S ribosomal protein S7 OS=Rattus norvegicus GN=Rps7 PE=1 SV=1 - [RS7_RAT]	22.1133	10.0962	44.85	5	5	structural molecule activity	nucleus; organelle lumen; cytoplasm; cytoskeleton; ribosome; cytosol	metabolic process	Pf01251	1.19439	1.98319	1.0446	1.66042	0.00147038	0.874586	0.357798
Q63150	Dihydropyrimidinase OS=Rattus norvegicus GN=Dpys PE=1 SV=2 - [DPYS_RAT]	56.7787	7.2251	44.89	14	1	catalytic activity; metal ion binding; protein binding	cytoplasm; cytosol	metabolic process; cell organization and biogenesis	Pf01979; Pf04909; Pf07969	0.555335	0.558517	0.408649	1.00573	0.824293	0.73586	0.021955
D3ZXY4	Protein Aldh8a1 OS=Rattus norvegicus GN=Aldh8a1 PE=3 SV=1 - [D3ZXY4_RAT]	53.4263	7.54736	44.97	16	1	catalytic activity	membrane	metabolic process	Pf00171	0.577892	0.470815	0.507116	0.81471	0.237961	0.877527	0.371903
P52873	Pyruvate carboxylase, mitochondrial OS=Rattus norvegicus GN=Pc PE=1 SV=2 - [PYC_RAT]	129.695	6.81494	44.99	27	1	nucleotide binding; catalytic activity; metal ion binding	cytoplasm; mitochondrion; membrane; organelle lumen	metabolic process	Pf00289; Pf00364; Pf00682; Pf02222; Pf02436; Pf02785; Pf02786; Pf07478; Pf08443	0.573996	0.480153	0.534844	0.836508	0.317311	0.931789	0.677094
Q6P972	Tubulin, alpha 2 OS=Danio rerio GN=tuba2 PE=2 SV=1 - [Q6P972_DANRE]	50.0045	5.021	45.23	2	1	nucleotide binding; catalytic activity; structural molecule activity	cytoplasm; cytoskeleton	metabolic process; cellular component movement; cell organization and biogenesis	Pf00091; Pf03953	1.9427	2.27845	2.01076	1.17283	0.258886	1.03504	0.6315
Q6UPE0	Choline dehydrogenase, mitochondrial OS=Rattus norvegicus GN=Chdh PE=1 SV=1 - [CHDH_RAT]	66.3464	8.47021	45.24	16	3	catalytic activity	cytoplasm; mitochondrion; membrane	metabolic process	Pf00732; Pf01266; Pf05199; Pf05834	0.631824	0.54012	0.578337	0.854858	0.394219	0.915345	0.576959
O88618	Formimidoyltransferase-cyclodeaminase OS=Rattus norvegicus GN=Ftcd PE=1 SV=4 - [FTCD_RAT]	58.8765	6.0874	45.29	20	1	catalytic activity; protein binding	cytoplasm; Golgi; cytoskeleton	metabolic process; cell organization and biogenesis	Pf02971; Pf04961; Pf07837	0.707153	0.724652	0.722812	1.02475	0.739469	1.02214	0.714789
Q7SYK7	Aspartate aminotransferase OS=Danio rerio GN=got2a PE=2 SV=1 - [Q7SYK7_DANRE]	47.5566	9.17334	45.33	14	2	catalytic activity		metabolic process	Pf00155	0.9547	0.895616	0.965095	0.938112	0.82736	1.01089	0.791349
G8JF14	Heat shock cognate protein OS=Dugesia japonica GN=hsc70 PE=2 SV=2 - [G8JF14_DUGJA]	72.6227	5.56689	45.45	24	1	nucleotide binding; catalytic activity; protein binding		cell organization and biogenesis; response to stimulus	Pf00012; Pf01968; Pf03234; Pf06723	2.23997	2.03176	2.32018	0.907047	0.654308	1.03581	0.626685
P07824	Arginase-1 OS=Rattus norvegicus GN=Arg1 PE=1 SV=2 - [ARGI1_RAT]	34.9513	7.25439	45.51	11	1	catalytic activity; metal ion binding	extracellular; cytoplasm; membrane; mitochondrion	metabolic process; development; cell proliferation; regulation of biological process; reproduction; response to stimulus; transport; cell organization and biogenesis	Pf00491	0.530233	0.511005	0.485991	0.963737	0.972659	0.916562	0.584186
O88989	Malate dehydrogenase, cytoplasmic OS=Rattus norvegicus GN=Mdh1 PE=1 SV=3 - [MDHC_RAT]	36.46	6.58057	45.51	12	1	nucleotide binding; catalytic activity	cytoplasm; mitochondrion; cytoskeleton	metabolic process	Pf00056; Pf02866	0.530715	0.681936	0.544914	1.28494	0.09537	1.02676	0.684417
Q7SXU3	Aldehyde dehydrogenase 2 family (Mitochondrial)a OS=Danio rerio GN=aldh2.1 PE=2 SV=1 - [Q7SXU3_DANRE]	56.5296	6.31592	45.54	6	2	catalytic activity		metabolic process	Pf00171	1.05522	1.08679	1.02722	1.02991	0.717171	0.973463	0.945018
Q1HCL7	NAD kinase domain-containing protein 1, mitochondrial OS=Rattus norvegicus GN=Nadkd1 PE=2 SV=1 - [NAKD1_RAT]	48.0866	6.94678	45.65	16	4	catalytic activity	cytoplasm; mitochondrion	metabolic process; cell communication; regulation of biological process; response to stimulus	Pf00781; Pf01513	0.742677	0.734009	0.785638	0.988328	0.90525	1.05785	0.497646
F1M9Q5	Hydroxymethylglutaryl-CoA synthase, mitochondrial (Fragment) OS=Rattus norvegicus GN=Hmgcs2 PE=2 SV=1 - [F1M9Q5_RAT]	53.0455	8.20654	45.78	18	5	catalytic activity	cytoplasm; mitochondrion; membrane	metabolic process	Pf01154; Pf08540; Pf08545	0.53256	0.461152	0.450605	0.865915	0.444672	0.846113	0.237039
P00507	Aspartate aminotransferase, mitochondrial OS=Rattus norvegicus GN=Got2 PE=1 SV=2 - [AATM_RAT]	47.2841	8.99756	45.81	17	3	catalytic activity; protein binding	cytoplasm; mitochondrion; membrane; organelle lumen; cell surface	metabolic process; transport; response to stimulus	Pf00155	0.513546	0.489536	0.464411	0.953246	0.913259	0.904322	0.513081
D3ZX87	Uncharacterized protein OS=Rattus norvegicus GN=LOC100910017 PE=4 SV=1 - [D3ZX87_RAT]	14.2537	10.2134	45.97	2	22	structural molecule activity	cytoplasm; ribosome	metabolic process	Pf01198	0.671435	0.511453	0.668903	0.761731	0.101269	0.996229	0.895388
P41034	Alpha-tocopherol transfer protein OS=Rattus norvegicus GN=Ttpa PE=1 SV=1 - [TTPA_RAT]	31.8255	7.02002	46.04	9	1	transporter activity	cytoplasm; endosome; cytosol	development; transport; response to stimulus; metabolic process; cell differentiation; regulation of biological process	Pf00650	0.510545	0.437097	0.461484	0.856138	0.399907	0.903905	0.510724
E7EZ94	Uncharacterized protein OS=Danio rerio GN=gstt1a PE=3 SV=1 - [E7EZ94_DANRE]	27.4834	6.55127	46.28	9	2	protein binding			Pf00043; Pf02798	0.984721	0.906362	1.00171	0.920425	0.727902	1.01726	0.747617
Q6DGU9	Uncharacterized protein OS=Danio rerio GN=zgc:92763 PE=2 SV=1 - [Q6DGU9_DANRE]	25.8902	8.22119	46.29	8	4	catalytic activity			Pf01323	0.894435	0.872647	0.890252	0.97564	0.96587	0.995323	0.901948
P21571	ATP synthase-coupling factor 6, mitochondrial OS=Rattus norvegicus GN=Atp5j PE=1 SV=1 - [ATP5J_RAT]	12.4866	9.43701	46.3	6	1	transporter activity; catalytic activity	cytoplasm; membrane; mitochondrion	metabolic process; transport	Pf05511	0.861425	1.47999	0.760215	1.71808	0.000719864	0.882508	0.396462
A8E5L8	Nme4 protein OS=Danio rerio GN=nme4 PE=2 SV=1 - [A8E5L8_DANRE]	21.188	9.65674	46.32	8	6	nucleotide binding; catalytic activity; metal ion binding	cytoplasm	metabolic process	Pf00334	1.16268	1.29026	1.07618	1.10973	0.422158	0.925605	0.638846
Q24JV3	Uncharacterized protein OS=Danio rerio GN=rpl31 PE=2 SV=1 - [Q24JV3_DANRE]	14.3288	10.5356	46.34	3	9	structural molecule activity	cytoplasm; ribosome	metabolic process	Pf01198	1.32804	1.48998	1.28808	1.12194	0.385798	0.969908	0.921917
P62859	40S ribosomal protein S28 OS=Rattus norvegicus GN=Rps28 PE=1 SV=1 - [RS28_RAT]	7.8362	10.6968	46.38	3	3	RNA binding; structural molecule activity	cytoplasm; ribosome; cytosol	metabolic process; transport	Pf01200	1.07123	1.33921	1.21099	1.25016	0.132117	1.13047	0.199457
A9UMV9	Ndufa7 protein OS=Rattus norvegicus GN=Ndufa7 PE=4 SV=1 - [A9UMV9_RAT]	12.4926	10.4771	46.43	4	1	catalytic activity	cytoplasm; mitochondrion; membrane	metabolic process	Pf07347	0.722941	0.80605	0.636576	1.11496	0.406289	0.880538	0.386649
Q6NYL5	Alanine aminotransferase 2-like OS=Danio rerio GN=gpt2l PE=2 SV=2 - [ALAT2_DANRE]	61.0529	8.26514	46.45	14	3	catalytic activity		metabolic process	Pf00155	1.00236	0.993257	0.990103	0.99092	0.893017	0.987774	0.957065
F1LZW6	Protein Slc25a13 (Fragment) OS=Rattus norvegicus GN=Slc25a13 PE=3 SV=1 - [F1LZW6_RAT]	74.3358	8.70459	46.52	17	3	transporter activity; metal ion binding	cytoplasm; mitochondrion; membrane	metabolic process; transport; response to stimulus	Pf00153	0.579601	0.515583	0.371827	0.889548	0.561469	0.641523	0.000723085
Q9EQX9	Ubiquitin-conjugating enzyme E2 N OS=Rattus norvegicus GN=Ube2n PE=1 SV=1 - [UBE2N_RAT]	17.113	6.56592	46.71	6	5	nucleotide binding; catalytic activity; protein binding	nucleus; cytoplasm	metabolic process; response to stimulus; cell organization and biogenesis; regulation of biological process; cell communication	Pf00179	0.749314	0.802843	0.775083	1.07144	0.551522	1.03439	0.635548
Q64057	Alpha-aminoadipic semialdehyde dehydrogenase OS=Rattus norvegicus GN=Aldh7a1 PE=1 SV=2 - [AL7A1_RAT]	58.7114	7.86963	46.75	17	1	catalytic activity	nucleus; cytoplasm; mitochondrion; cytosol	metabolic process	Pf00171	0.471951	0.434833	0.507023	0.921352	0.733063	1.07431	0.412826
P15651	Short-chain specific acyl-CoA dehydrogenase, mitochondrial OS=Rattus norvegicus GN=Acads PE=1 SV=2 - [ACADS_RAT]	44.737	8.27979	46.84	13	2	catalytic activity	cytoplasm; mitochondrion; organelle lumen; membrane	metabolic process; response to stimulus; cell organization and biogenesis	Pf00441; Pf02770; Pf02771; Pf08028	0.675865	0.604484	0.563261	0.894386	0.586668	0.833394	0.192677
Q64573	Liver carboxylesterase 4 OS=Rattus norvegicus PE=2 SV=2 - [EST4_RAT]	62.2687	6.75635	46.88	9	3	catalytic activity	cytoplasm; endoplasmic reticulum; organelle lumen	metabolic process	Pf00135; Pf00326; Pf00756; Pf07859	0.932169	0.897509	0.972348	0.962818	0.96747	1.0431	0.582083
Q5RKL4	Dimethylglycine dehydrogenase OS=Rattus norvegicus GN=Dmgdh PE=2 SV=1 - [Q5RKL4_RAT]	95.9174	7.23975	46.91	2	2	catalytic activity	cytoplasm; mitochondrion	metabolic process	Pf01266; Pf01571; Pf01946; Pf04268; Pf08669	0.75031	0.675258	0.74131	0.899973	0.616236	0.988006	0.955363
Q920L2	Succinate dehydrogenase [ubiquinone] flavoprotein subunit, mitochondrial OS=Rattus norvegicus GN=Sdha PE=1 SV=1 - [DHSA_RAT]	71.5697	7.1665	46.95	14	3	catalytic activity	cytoplasm; mitochondrion; membrane	metabolic process; transport; development	Pf00890; Pf02910	0.723576	0.600472	0.650676	0.829867	0.291716	0.89925	0.48473
P25093	Fumarylacetoacetase OS=Rattus norvegicus GN=Fah PE=1 SV=1 - [FAAA_RAT]	45.946	7.1665	47.02	15	3	catalytic activity; metal ion binding		metabolic process	Pf01557; Pf09298	0.619425	0.559474	0.601368	0.903216	0.633606	0.970849	0.928036
Q7LZ84	Myosin heavy chain, cardiac and skeletal muscle (Fragment) OS=Notophthalmus viridescens PE=4 SV=1 - [Q7LZ84_NOTVI]	45.1625	5.80811	47.04	6	2	catalytic activity; motor activity	cytoskeleton		Pf01576; Pf07888; Pf12128	0.759409	1.10039	0.976047	1.44901	0.0174614	1.28527	0.0141968
A4V6N0	EIF4A isoform 1A protein OS=Dugesia japonica PE=2 SV=1 - [A4V6N0_DUGJA]	43.9776	5.43994	47.04	12	1	nucleotide binding; catalytic activity			Pf00270; Pf00271	1.85227	1.75735	1.93654	0.948754	0.887755	1.0455	0.567854
P97532	3-mercaptopyruvate sulfurtransferase OS=Rattus norvegicus GN=Mpst PE=1 SV=3 - [THTM_RAT]	32.9194	6.31592	47.14	9	1	catalytic activity	cytoplasm; mitochondrion; membrane		Pf00581	0.698288	0.546187	0.601792	0.782181	0.144833	0.861812	0.300005
B2RYW9	Fumarylacetoacetate hydrolase domain-containing protein 2 OS=Rattus norvegicus GN=Fahd2 PE=1 SV=1 - [FAHD2_RAT]	34.5591	8.35303	47.28	11	1	catalytic activity; metal ion binding	cytoplasm; mitochondrion	metabolic process	Pf01557	1.00232	0.796217	0.860325	0.794372	0.176204	0.858331	0.285269
P19945	60S acidic ribosomal protein P0 OS=Rattus norvegicus GN=Rplp0 PE=1 SV=2 - [RLA0_RAT]	34.1938	6.25244	47.32	5	4	structural molecule activity	nucleus; cytoplasm; ribosome	metabolic process	Pf00428; Pf00466	0.684654	0.683099	0.736424	0.997729	0.861164	1.07561	0.406563
Q7ZTS4	Keratin, type I cytoskeletal 18 OS=Danio rerio GN=krt18 PE=1 SV=2 - [K1C18_DANRE]	48.6011	5.64307	47.33	15	18	catalytic activity; motor activity; structural molecule activity	cytoskeleton	metabolic process	Pf00038; Pf01576; Pf04111; Pf12128	1.191	1.06719	1.15654	0.896038	0.595362	0.971065	0.929435
Q6NWF6	Keratin, type II cytoskeletal 8 OS=Danio rerio GN=krt8 PE=1 SV=1 - [K2C8_DANRE]	57.7235	5.22412	47.5	12	7	catalytic activity; motor activity; structural molecule activity	nucleus; organelle lumen; cytoplasm; cytoskeleton; membrane	cell organization and biogenesis	Pf00038; Pf01576; Pf03148; Pf05957; Pf09726; Pf11559; Pf12128	0.88175	0.743228	0.856277	0.842901	0.343095	0.971111	0.929739
D4A6G6	Protein LOC100362339 OS=Rattus norvegicus GN=LOC100362339 PE=4 SV=1 - [D4A6G6_RAT]	16.1076	10.4038	47.59	5	13	structural molecule activity	cytoplasm; ribosome	metabolic process	Pf01090	0.537163	0.509555	0.457364	0.948604	0.886901	0.851444	0.257411
F1D9A9	Puromycin-sensitive aminopeptidase OS=Dugesia japonica GN=PSA PE=2 SV=1 - [F1D9A9_DUGJA]	24.8705	7.7085	47.64	10	1	catalytic activity	membrane	metabolic process		1.75724	1.8095	1.95808	1.02974	0.717907	1.11429	0.249405
F1LNY0	Hypoxanthine-guanine phosphoribosyltransferase OS=Rattus norvegicus GN=Hprt1 PE=2 SV=1 - [F1LNY0_RAT]	24.5625	6.07471	47.71	4	3	catalytic activity	cytoplasm	metabolic process	Pf00156	0.851197	0.679183	0.760334	0.797915	0.186108	0.893253	0.452141
Q6PC77	ATP synthase, H+ transporting, mitochondrial F0 complex, subunit d OS=Danio rerio GN=atp5h PE=2 SV=1 - [Q6PC77_DANRE]	18.2463	8.25049	47.83	6	1	transporter activity	cytoplasm; membrane; mitochondrion	metabolic process; transport	Pf05873	1.08877	1.06394	1.06469	0.977197	0.958372	0.977887	0.973706
Q803B0	Heat shock 60kD protein 1 (Chaperonin) OS=Danio rerio GN=hspd1 PE=2 SV=1 - [Q803B0_DANRE]	61.1579	5.71924	47.83	7	3	nucleotide binding; protein binding	cytoplasm; mitochondrion; organelle lumen	metabolic process; response to stimulus; development	Pf00118	1.87132	1.73936	1.84847	0.929486	0.778633	0.987793	0.956926
B0BN52	Mitochondrial carrier homolog 2 (C. elegans) OS=Rattus norvegicus GN=Mtch2 PE=2 SV=1 - [B0BN52_RAT]	33.506	8.25049	47.85	11	3		cytoplasm; mitochondrion; membrane	transport	Pf00153	0.656921	0.684794	0.615744	1.04243	0.66464	0.937318	0.711793
F1M7G5	Protein LOC100364224 OS=Rattus norvegicus GN=Sult2a1 PE=2 SV=1 - [F1M7G5_RAT]	33.1409	8.39697	47.89	7	4	catalytic activity			Pf00685	1.03374	0.996374	0.98229	0.963851	0.973303	0.950226	0.794222
Q6P5L8	Hydroxysteroid dehydrogenase-like protein 2 OS=Danio rerio GN=hsdl2 PE=2 SV=1 - [HSDL2_DANRE]	44.3918	7.47412	47.95	13	1	nucleotide binding; catalytic activity	cytoplasm	metabolic process	Pf00106; Pf02036	1.18024	1.07127	1.05194	0.907675	0.657719	0.891293	0.441716
Q00715	Histone H2B type 1 OS=Rattus norvegicus PE=1 SV=2 - [H2B1_RAT]	13.9816	10.3599	48	2	13	DNA binding; protein binding	chromosome; nucleus	cell organization and biogenesis; metabolic process; defense response; response to stimulus	Pf00125	0.609424	0.497736	0.557161	0.816731	0.24475	0.914241	0.570432
P50554	4-aminobutyrate aminotransferase, mitochondrial OS=Rattus norvegicus GN=Abat PE=1 SV=3 - [GABT_RAT]	56.4194	7.92822	48	15	3	catalytic activity; protein binding	cytoplasm; mitochondrion; organelle lumen	response to stimulus; reproduction; metabolic process; cell communication	Pf00202	0.625666	0.555172	0.581068	0.88733	0.550045	0.928719	0.658027
Q9WVK7	Hydroxyacyl-coenzyme A dehydrogenase, mitochondrial OS=Rattus norvegicus GN=Hadh PE=2 SV=1 - [HCDH_RAT]	34.4259	8.76318	48.09	9	1	nucleotide binding; catalytic activity	nucleus; organelle lumen; cytoplasm; mitochondrion; membrane	metabolic process; response to stimulus; cell communication; regulation of biological process; transport	Pf00725; Pf01266; Pf02737; Pf07992	0.552661	0.6139	0.617417	1.11081	0.418844	1.11717	0.239877
K4LC08	Actin (Fragment) OS=Phagocata sibirica PE=3 SV=1 - [K4LC08_9TURB]	26.2652	5.47803	48.1	2	1				Pf00022	1.62853	1.38169	1.86538	0.848426	0.366259	1.14544	0.160639
[truncated: 207 more rows]
